# Supplementary material for: Enantioselective organocatalytic formal [3+2]-cycloaddition of isatin-derived ketimines with benzylidenemalononitriles and benzylidineindanones
Source: Royal Society of Chemistry journal article supplement (doi:10.1039/d1nj04002b), 2021-01-01
Supplement: d1nj04002b1.pdf [file d1nj04002b1.pdf]

## Supplementary Information

# Enantioselective organocatalytic formal [3+2]- cycloaddition of isatin-derived ketimines with benzylidenemalononitriles and benzylidineindanones

Conor Duffy,<sup>a</sup> William E. Roe,<sup>a</sup> Aislinn M. Harkin,<sup>a</sup> Ryan McNamee<sup>b</sup> and Peter C. Knipe\*<sup>a</sup>

<sup>a</sup> *School of Chemistry and Chemical Engineering, Queen's University Belfast, David Keir Building, Belfast, BT9 5AG, UK*

<sup>b</sup> *Chemistry Research Laboratory, University of Oxford, 12 Mansfield Road, Oxford, OX1 3TA, UK*

## 1 Contents

|     |                                                         |    |
|-----|---------------------------------------------------------|----|
| 2   | General Experimental .....                              | 3  |
| 2.1 | Naming and Numbering of Compounds .....                 | 3  |
| 2.2 | Solvents and reagents .....                             | 3  |
| 2.3 | Purification .....                                      | 3  |
| 2.4 | Spectroscopy .....                                      | 3  |
| 2.5 | Mass Spectrometry .....                                 | 4  |
| 2.6 | High-Pressure Liquid Chromatography (HPLC) .....        | 4  |
| 2.7 | Crystallography .....                                   | 4  |
| 2.8 | Melting Points .....                                    | 5  |
| 3   | Experimental procedures and characterisation data ..... | 6  |
| 3.1 | Starting materials .....                                | 6  |
| 3.2 | Catalyst synthesis .....                                | 18 |
| 3.3 | Spirooxindole products .....                            | 25 |
| 4   | HPLC data .....                                         | 46 |

|     |                                                                    |     |
|-----|--------------------------------------------------------------------|-----|
| 5   | Kinetic Study .....                                                | 81  |
| 5.1 | Kinetic profiling and catalyst screening experiments .....         | 81  |
| 5.2 | HPLCs Traces for Catalyst Screen .....                             | 84  |
| 6   | X-ray Crystallography .....                                        | 88  |
| 6.1 | Single Crystal Data for (-)-3d <sub>maj</sub> (CCDC 2103731) ..... | 88  |
| 6.2 | Single Crystal Data for (-)-3l <sub>maj</sub> (CCDC 2114148) ..... | 89  |
| 6.3 | Single Crystal Data for (±)-5a (CCDC 2103730) .....                | 90  |
| 7   | NMR spectra .....                                                  | 91  |
| 8   | References .....                                                   | 216 |

## 2 General Experimental

### 2.1 Naming and Numbering of Compounds

Systematic compound names are those generated by ChemBioDraw™ Ultra version 15.1.0.144 (Perkin Elmer) following IUPAC nomenclature.

### 2.2 Solvents and reagents

Unless stated otherwise, all other solvents and reagents used were directly obtained from commercial sources. Anhydrous and oxygen-free THF was obtained by distillation from Na/benzophenone. Due to the air and moisture sensitive nature of several of the reactions, glassware was oven-dried prior to use and the reaction performed under an inert (argon) atmosphere, with solvents being dried over 3 Å molecular sieves prior to their use. Anhydrous solvents were degassed with argon for 15 minutes immediately prior to use.

### 2.3 Purification

Flash column chromatography was carried out using Fluorochem 60 40-63 micron silica gel. Thin-layer chromatography was carried out using Merck Kieselgel 60 F254 (230-400 mesh) fluorescent treated silica, visualized under UV light (254 nm) or by staining with aqueous potassium permanganate solution, ninhydrin or ceric ammonium molybdate solutions.

### 2.4 Spectroscopy

<sup>1</sup>H, <sup>13</sup>C, and <sup>19</sup>F NMR spectra were obtained using Bruker 600, or 400 MHz spectrometers using either CDCl<sub>3</sub> or DMSO-d<sub>6</sub> as the solvent. To analyse and process the NMR spectra, TopSpin™ software was used, and spectra were calibrated against residual non-deuteriated solvent peaks as internal standards. The chemical shifts are reported in parts per million (ppm) and coupling constants (*J*) are reported in Hertz (Hz). <sup>1</sup>H NMR spectra are reported as follows: δ/ppm (number of protons, multiplicity, coupling constant, assignment of peak (if possible)). The multiplicities are abbreviated as follows: s = singlet, d = doublet, t = triplet, q = quartet, m = multiplet. <sup>13</sup>C NMR spectra are reported as follows: δ/ppm (assignment). Chemical structures are numbered arbitrarily for the purpose of assignment; this numbering scheme does not necessarily correspond with the systematic name of the compound. Two-dimensional NMR experiments (COSY, HSQC, HMBC, NOESY) were also recorded when necessary to help aid assignment of the proton and carbon peaks.

Infra-red (IR) spectra were recorded on an Agilent Cary 630 spectrometer equipped with an attenuated total reflectance (ATR) accessory. Samples were deposited on the ATR as a thin film or neat solid. Only selected maximum absorbances ( $\nu_{\max}$ ) of the most intense peaks are reported ( $\text{cm}^{-1}$ ).

Optical rotations were recorded at the sodium D-line (589 nm) using a Perkin Elmer 341 polarimeter at a temperature of 20 °C and are reported in degrees using concentrations ( $c$ ) in  $\text{g}\cdot 100\text{ mL}^{-1}$ . Reported values are the average of eight readings

## 2.5 Mass Spectrometry

Liquid chromatography-mass spectrometry (LCMS) analyses were conducted using an instrument comprising an Agilent 1260 HPLC (equipped with Infinity II quaternary pump, vial sampler, integrated column compartment and variable wavelength detector) and MSD single quadrupole mass spectrometer. Samples were analysed using an Agilent Infinitylab poroshell 120 column (2.7  $\mu\text{m}$ , 2.1 x 150 mm) under an acetonitrile/water gradient with 0.1% HCOOH additive.

High resolution mass spectra (HRMS) were recorded by Analytical Services and Environmental Projects (ASEP) at Queen's University Belfast on a Waters LCT Premier ToF mass spectrometer using the electrospray ionisation (ESI) technique.

## 2.6 High-Pressure Liquid Chromatography (HPLC)

HPLC was performed on Agilent 1260 and Agilent 1100 instruments, eluting under reverse phase (acetonitrile-water) and normal phase (hexane/chloroform-isopropanol) conditions respectively. The columns, solvents, flow rates and acquisition wavelengths used for individual compounds can be found in section 3.3.

## 2.7 Crystallography

Low temperature<sup>1</sup> single crystal Xray diffraction studies were carried out using  $\text{CuK}\alpha$  radiation on an Agilent Supernova diffractometer equipped with an area detector and graphite monochromator. Raw frame data were reduced using CrysAlisPRO<sup>2</sup> solved using SHELXT<sup>3</sup> (**3d**) and Superflip (**5a**).<sup>4</sup> Full-matrix least-squares refinement of the structures were carried out using CRYSTALS.<sup>5,6</sup> Full refinement details are given in the supplementary material (CIF). CCDC 2103730, 2103731 and 2114148 contain the supplementary crystallographic data for this paper. These data are provided free of charge by The Cambridge Crystallographic Data Centre and copies can be obtained free of charge *via* [www.ccdc.cam.ac.uk/data\\_request/cif](http://www.ccdc.cam.ac.uk/data_request/cif).



## 2.8 Melting Points

Melting points were determined for compounds where a recrystallization was carried out. These were acquired on a Stuart SMP10 digital melting point apparatus. Values are given in °C and are uncorrected.

## 3 Experimental procedures and characterisation data

### 3.1 Starting materials

#### *General procedure 1 (GP1) for the synthesis of benzylidene derivatives*

To a solution of active methylene compound (1 eq.) in EtOH:H<sub>2</sub>O (3:7 v:v) was added the aldehyde (1 eq.) in one portion. The mixture was stirred, placed under argon and warmed to 75 °C, and reaction progress was monitored by TLC. Upon completion, the reaction mixture was cooled to RT and the precipitate filtered under vacuum and washed with pure water (2 mL) or purified by flash column chromatography to afford the products.

#### *2-Benzylidenemalononitrile (2a)*

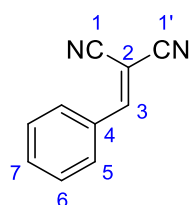

Synthesised following **GP1** according to a literature procedure, and the data obtained are consistent with those previously reported.<sup>7</sup>

Malononitrile (2.00 g, 30.3 mmol, 1 eq.) and benzaldehyde (3.08 mL, 30.3 mmol, 1 eq.) after 17 h in EtOH:H<sub>2</sub>O (3:7, 120 mL) afforded the product (4.58 g, 98%) as a white solid.  $\delta_H$  (400 MHz, CDCl<sub>3</sub>): 7.91 (2H, d, *J* 7.6 Hz, **H5**), 7.78 (1H, s, **H3**), 7.64 (1H, t, *J* 7.6 Hz, **Ar**), 7.54 (2H, t, *J* 7.8 Hz, **Ar**);  $\delta_C$  (101 MHz, CDCl<sub>3</sub>): 160.1(**C3**), 134.8 (**C5**), 131.9 (**Ar**), 130.8 (**Ar**), 129.8 (**C4**), 113.7 (**C1'**), 112.7 (**C1**), 83.0 (**C2**).

#### *2-(4-Methoxybenzylidene)malononitrile (2b)*

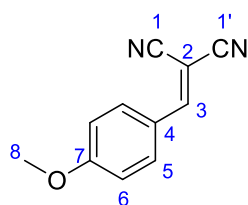

Synthesised following **GP1** according to a literature procedure, and the data obtained are consistent with those previously reported.<sup>7</sup>

Malononitrile (0.5 g, 7.57 mmol, 1 eq.) and 4-methoxybenzaldehyde (0.921 mL, 7.57 mmol, 1 eq.) after 19 h in EtOH:H<sub>2</sub>O (3:7, 30 mL) afforded the product (1.39 g, 99%) as a fluffy, yellow solid.  $\delta_H$  (400 MHz, CDCl<sub>3</sub>): 7.91 (2H, m, **Ar**), 7.65 (1H, s, **H3**), 7.01 (2H, m, **Ar**), 3.91 (3H, s, **H8**);  $\delta_C$  (101 MHz,

CDCl<sub>3</sub>): 165.0 (**C7**), 156.0 (**C3**), 133.6 (**Ar**), 124.2 (**C4**), 115.3 (**Ar**), 114.6 (**C1**), 113.5 (**C1'**), 78.8 (**C2**), 55.8 (**C8**).

2-(4-Nitrobenzylidene)malononitrile (**2c**)

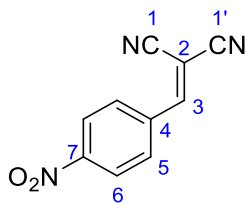

Synthesised following **GP1** according to a literature procedure, and the data obtained are consistent with those previously reported.<sup>7</sup>

Malononitrile (0.5 g, 7.57 mmol, 1 eq.) and 4-nitrobenzaldehyde (1.14 g, 7.57 mmol, 1 eq.) after 18 h in EtOH:H<sub>2</sub>O (3:7, 30 mL) afforded the product (1.36 g, 90%) as a brown solid.  $\delta_H$  (400 MHz, CDCl<sub>3</sub>): 8.39 (2H, d, *J* 8.8 Hz, **Ar**), 8.07 (2H, d, *J* 8.8 Hz, **Ar**), 7.88 (1H, s, **H3**);  $\delta_C$  (101 MHz, CDCl<sub>3</sub>): 156.0 (**C3**), 150.5 (**C7**), 135.9 (**C4**), 131.4 (**Ar**), 124.8 (**Ar**), 112.8 (**C1'**), 111.7 (**C1**), 87.7 (**C2**).

2-(Naphthalen-2-ylmethylene)malononitrile (**2d**)

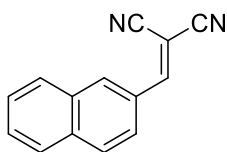

Synthesised following **GP1** according to a literature procedure, and the data obtained are consistent with those previously reported.<sup>7</sup>

Malononitrile (0.25 g, 3.78 mmol, 1 eq.) and 2-naphthaldehyde (0.590 g, 3.78 mmol, 1 eq.) after 1.5 h in EtOH:H<sub>2</sub>O (3:7, 15 mL) afforded the product (0.768 g, 99%) as a yellow solid.  $\delta_H$  (400 MHz, CDCl<sub>3</sub>): 8.29 (1H, s), 8.07 (1H, dd, *J* 8.7, 1.8 Hz), 7.92 (4H, m), 7.68 (1H, t, *J* 6.9 Hz), 7.61 (1H, t, *J* 7.0 Hz);  $\delta_C$  (101 MHz, CDCl<sub>3</sub>): 159.9, 136.0, 134.6, 132.8, 130.1, 129.8, 128.7, 128.2, 127.8, 124.4, 114.1, 113.0, 82.4.\*

---

\* One expected <sup>13</sup>C signal is absent due to co-incidence with another peak.

### 2-(2-methylbenzylidene)malononitrile (2e)

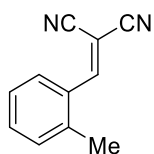

The reaction was carried out according to a literature procedure and the data obtained are consistent with those previously reported.<sup>8</sup>

*o*-Tolualdehyde (0.46 ml, 3.97 mmol, 1 eq.), malononitrile (0.46 ml, 3.92 mmol, 1 eq.), and K<sub>2</sub>CO<sub>3</sub> (56 mg, 0.405 mmol, 0.1 eq.) were added into a mortar and ground rapidly at rt for 1 min. The mixture was washed with water and filtered, and the crude product then recrystallized from ethanol, to yield the product as white needles, 280 mg, 43%. M.p. = 107-110 °C (EtOH).

$\delta_{\text{H}}$  (400 MHz, CDCl<sub>3</sub>): 8.10 (1H, s), 8.08 (1H, d, *J* 8.8 Hz), 7.50 (1H, td, *J* 7.5, 1.2 Hz), 7.37 (1H, d, *J* 7.8 Hz), 7.33 (1H, d, *J* 7.8 Hz), 2.45 (3H, s);  $\delta_{\text{C}}$  (101 MHz, CDCl<sub>3</sub>): 158.3, 139.9, 134.3, 131.5, 130.1, 128.4, 127.2, 113.9, 112.6, 84.2, 19.9; **HRMS** (ESI<sup>+</sup>): found 201.0979; C<sub>8</sub>H<sub>4</sub>N<sub>2</sub>OCH<sub>5</sub>O, [M+MeOH+H]<sup>+</sup> requires 201.1022;  $\nu_{\text{max}}$  (neat): 2967.0, 2221.5, 1572.9, 1371.7, 1230.0, 1058.6.

### 2-(2-Bromobenzylidene)malononitrile (2f)

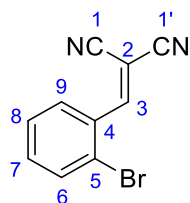

Synthesised following **GP1** by analogy to a literature procedure,<sup>7</sup> and the data obtained are consistent with those previously reported.<sup>9</sup>

Malononitrile (0.25 g, 3.78 mmol, 1 eq.) and 2-bromobenzaldehyde (0.441 mL, 3.78 mmol, 1 eq.) after 21 h in EtOH:H<sub>2</sub>O (3:7, 15 mL) afforded the product (0.499 g, 57%) as a brown solid.  $\delta_{\text{H}}$  (400 MHz, CDCl<sub>3</sub>): 8.22 (1H, s, **H3**), 8.12 (1H, dd, *J* 7.6, 1.8 Hz, **Ar**), 7.74 (1H, dd, *J* 7.8, 1.5 Hz, **Ar**), 7.47 (2H, m, **H7-8**);  $\delta_{\text{C}}$  (101 MHz, CDCl<sub>3</sub>): 158.9 (**C3**), 135.1 (**Ar**), 134.2 (**Ar**), 131.0 (**C5**), 130.0 (**Ar**), 128.5 (**Ar**), 126.6 (**C4**), 113.3 (**C1'**), 111.9 (**C1**), 86.2 (**C2**).

### 2-(4-Chlorobenzylidene)malononitrile (2g)

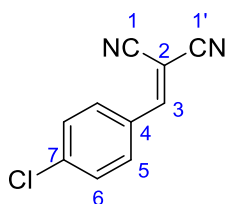

Synthesised following **GP1** according to a literature procedure, and the data obtained are consistent with those previously reported.<sup>7</sup>

Malononitrile (0.25 g, 3.78 mmol, 1 eq.) and 4-chlorobenzaldehyde (0.531 g, 3.78 mmol, 1 eq.) after 1 h in EtOH:H<sub>2</sub>O (3:7, 15 mL) afforded the product (0.65 g, 91%) as a white powder.  $\delta_H$  (400 MHz, CDCl<sub>3</sub>): 7.85 (2H, d, *J* 8.6 Hz, **Ar**), 7.73 (1H, s, **H3**), 7.52 (2H, d, *J* 8.6 Hz, **Ar**);  $\delta_C$  (101 MHz, CDCl<sub>3</sub>): 158.4 (**C3**), 141.3 (**C7**), 132.0 (**Ar**), 130.2 (**Ar**), 129.4 (**C4**), 113.6 (**C1**), 112.5 (**C1'**), 83.5 (**C2**).

### 2-(3,4,5-Trimethoxybenzylidene)malononitrile (2h)

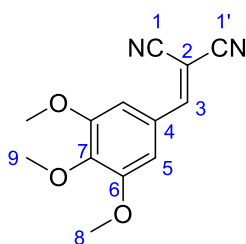

Synthesised following **GP1** according to a literature procedure.<sup>7</sup>

Malononitrile (0.25 g, 3.78 mmol, 1 eq.) and 3,4,5-trimethoxybenzaldehyde (0.741 g, 3.78 mmol, 1 eq.) after 1.5 h in EtOH:H<sub>2</sub>O (3:7, 15 mL) afforded the product (0.886 g, 96%) as a bright yellow solid.  $\delta_H$  (400 MHz, CDCl<sub>3</sub>): 7.65 (1H, s, **H3**), 7.19 (2H, s, **H5**), 3.98 (3H, s, **H9**), 3.91 (6H, s, **H8**);  $\delta_C$  (101 MHz, CDCl<sub>3</sub>): 159.5 (**C3**), 153.4 (**C6**), 144.2 (**C7**), 126.1 (**C4**), 114.1 (**C1'**), 113.3 (**C1**), 108.5 (**C5**), 80.8 (**C2**), 61.4 (**C9**), 56.5 (**C8**); **HRMS** (ESI<sup>+</sup>): found 283.0496; C<sub>13</sub>H<sub>12</sub>KN<sub>2</sub>O<sub>3</sub>, [M+K]<sup>+</sup> requires 283.0485;  $\nu_{max}$  (neat): 2939.0, 2219.6, 1567.3, 1498.4, 1343.7, 1321.3, 1258.0, 1127.5, 698.9.

### 2-(furan-2-ylmethylene)malononitrile (2i)

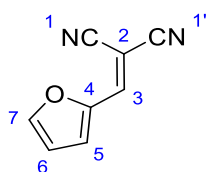

The reaction was carried out according to a literature procedure and the data obtained are consistent with those previously reported.<sup>8</sup>

Furfural (0.64 ml, 7.73 mmol, 1 eq.), malononitrile (510 mg, 7.72 mmol, 1 eq.), and K<sub>2</sub>CO<sub>3</sub> (115 mg, 0.832 mmol, 0.11 eq.) were added into a mortar and ground rapidly at rt for 1 min. The mixture was washed with water and filtered, and the crude product was purified via flash column chromatography (100% DCM), to yield the product as yellow solid, 490 mg, 44 %.

$\delta_{\text{H}}$  (400 MHz, CDCl<sub>3</sub>): 7.80 (1H, d, *J* 1.4, **H7**), 7.51 (1H, s, **H3**), 7.35 (1H, d, *J* 3.5 Hz, **H5**), 6.71 (1H, dd, *J*, 3.7, 1.7 Hz, **H6**);  $\delta_{\text{C}}$  (101 MHz, CDCl<sub>3</sub>): 149.7 (**C7**), 148.2 (**C4**), 143.1 (**C3**), 123.6 (**C5**), 114.6 (**C6**), 113.9 (**C1'**), 112.7 (**C1**), 77.7 (**C2**); **HRMS** (ESI<sup>+</sup>): found 162.0667; C<sub>8</sub>H<sub>4</sub>N<sub>2</sub>ONH<sub>4</sub>, [M+NH<sub>4</sub>]<sup>+</sup> requires 162.0662 ;  $\nu_{\text{max}}$  (neat): 3041.5, 2225.2, 1602.8, 1453.7, 1394.0, 1297.1, 1017.6.

#### 2-(3-phenylpropylidene)malononitrile (2j)

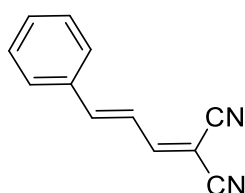

The reaction was carried out according to a literature procedure and the data obtained are consistent with those previously reported.<sup>8</sup>

Cinnamaldehyde (0.96 ml, 7.63 mmol, 1 eq.), malononitrile (506 mg, 7.66 mmol, 1 eq.), and K<sub>2</sub>CO<sub>3</sub> (118 mg, 0.854 mmol, 0.11 eq.) were added into a mortar and ground rapidly at rt for 10 min. The mixture was washed with water and filtered, and the crude product then recrystallized from ethanol, to yield the product as a yellow solid, 590 mg, 43%. M.p. = 127-130 °C (EtOH).  $\delta_{\text{H}}$  (400 MHz, CDCl<sub>3</sub>): 7.63-7.53 (3H, m), 7.51-7.42 (3H, m), 7.32-7.21 (2H, m);  $\delta_{\text{C}}$  (101 MHz, CDCl<sub>3</sub>): 160.2, 150.6, 134.1, 132.2, 129.5, 129.1, 122.4, 113.6, 111.8, 83.1; **HRMS** (ESI<sup>+</sup>): found 181.0766; C<sub>12</sub>H<sub>8</sub>N<sub>2</sub>H, [M+H]<sup>+</sup> requires 181.0760;  $\nu_{\text{max}}$  (neat): 2970.7, 2221.5, 1606.5, 1446.2, 1174.1, 1054.8.

#### Ethyl-2-cyano-3-phenylacrylate (2l)

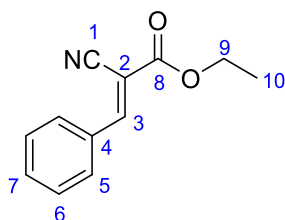

Synthesised following **GP1** according to a literature procedure and the data obtained are consistent with those previously reported.<sup>7</sup>

Ethyl cyanoacetate (0.5 mL, 4.70 mmol, 1 eq.) and benzaldehyde (0.477 mL, 4.70 mmol, 1 eq.) were heated at 75 °C for 24 h in EtOH:H<sub>2</sub>O (3:7, 15 mL). The mixture was cooled to RT, extracted with EtOAc (3x30 mL), dried over MgSO<sub>4</sub>, filtered, and concentrated *in vacuo*. The residue was purified by flash column chromatography (silica gel, PhMe:Et<sub>2</sub>O 99:1) to afford the product (0.245 g, 26%) as a white solid.  $\delta_H$  (400 MHz, CDCl<sub>3</sub>): 8.25 (1H, s, **H3**), 7.99 (2H, d, *J* 7.1 Hz, **H5**), 7.53 (3H, m, **H6-7**), 4.39 (2H, q, *J* 7.1 Hz, **H9**), 1.40 (3H, t, 7.1 Hz, **H10**);  $\delta_C$  (101 MHz, CDCl<sub>3</sub>): 162.6 (**C8**), 155.2 (**C3**), 133.4 (**Ar**), 131.6 (**C4**), 131.2 (**C5**), 129.4 (**Ar**), 115.6 (**C1**), 103.2 (**C2**), 62.9 (**C9**), 14.3 (**C10**).

*2-(3-phenylpropylidene)malononitrile (2o)*

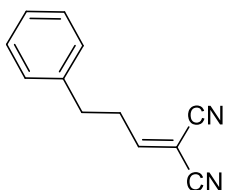

The reaction was carried out according to a literature procedure<sup>10</sup> and the data obtained are consistent with those previously reported.<sup>11</sup>

To a solution of hydrocinnamaldehyde (0.41 mL, 3.48 mmol, 1.0 eq.) and malononitrile (375 mg, 5.68 mmol, 1.6 eq.) under an inert atmosphere of argon in dry CH<sub>2</sub>Cl<sub>2</sub> (15 mL) was added K<sub>2</sub>CO<sub>3</sub> (262 mg, 1.89 mmol, 0.5 eq.). The reaction mixture was stirred at room temperature for 16 h, after which the solvent was then removed *in vacuo* and the residue quenched with ice cold water and then extracted with EtOAc (3 x 10 mL). The combined organic layers were then washed with brine, dried over MgSO<sub>4</sub>, filtered under gravity and then concentrated *in vacuo*. The crude residue was then purified by short silica plug (30 % DCM:petroleum ether) to afford the product (248 mg, 39%) as a yellow oil.

$\delta_H$  (400 MHz, CDCl<sub>3</sub>): 7.34 (2H, t, *J* 6.9 Hz), 7.30-7.26 (2H, m) 7.17 (1H, d, *J* 6.8 Hz), 2.96-2.85 (4H, m);  $\delta_C$  (101 MHz, CDCl<sub>3</sub>): 168.3, 138.3, 129.2, 128.4, 127.3, 112.1, 110.5, 90.8, 34.4, 33.7.

*2-benzylidene-1H-indene-1,3(2H)-dione (4a)*

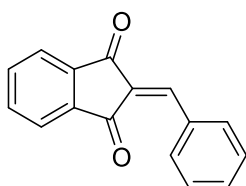

The reaction was carried out according to a literature procedure and the data obtained are consistent with those previously reported.<sup>12</sup>

To a round-bottom flask under an inert atmosphere of argon and equipped with a magnetic stir bar, was added 1,3-indandione (438 mg, 3.00 mmol, 1eq.), benzaldehyde (0.35 ml, 3.30 mmol, 1.1 eq.), *L*-proline (104 mg, 0.899 mmol, 0.3 eq.) and dry MeOH (6 ml). The reaction was then left to stir at rt for 20 hours, with a precipitate forming over time. Following this, the precipitate was then filtered under vacuum and washed several times with MeOH to yield the product as a khaki solid, 631 mg, 90 %.

$\delta_{\text{H}}$  (400 MHz,  $\text{CDCl}_3$ ): 8.46 (2H, d, *J* 8.3), 8.05-7.99 (2H, m), 7.90 (1H, s), 7.84-7.79 (2H, m), 7.59-7.49 (3H, m);  $\delta_{\text{C}}$  (101 MHz,  $\text{CDCl}_3$ ): 190.4, 189.1, 147.1, 142.7, 140.2, 135.5, 135.3, 134.3, 133.3, 133.2, 129.3, 128.9, 123.5, 123.4; **HRMS** (ESI+): found 235.0764;  $\text{C}_{16}\text{H}_{10}\text{O}_2$ ,  $[\text{M}+\text{H}]^+$  requires 235.0754;  $\nu_{\text{max}}$  (neat): 2113.4, 1681.0, 161.2, 1587.8, 1349.3, 1200.2.

*(E)-2-benzylidene-2,3-dihydro-1H-inden-1-one (4b)*

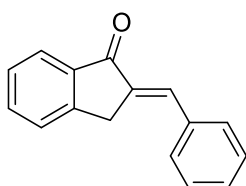

The reaction was carried out according to a literature procedure and the data obtained are consistent with those previously reported.<sup>13</sup>

To a round-bottom, equipped with a magnetic stir bar, was added indanone (333 mg, 2.52 mmol, 1 eq.), benzaldehyde (0.27 ml, 2.52 mmol, 1 eq.) and EtOH (1.4 ml). Following this the solution was then cooled down to 0 °C and 10 % NaOH (1.4 ml) solution then added dropwise. The solution was then left to stir at 0 °C for 2 hours. Once the reaction had finished the solid was then filtered under vacuum and washed with  $\text{H}_2\text{O}$  and hexane. The solid was then dried under high vac to yield the product as a faint pink solid, 485 mg, 87%.



$\delta_H$  (400 MHz,  $CDCl_3$ ): 7.91 (1H, d,  $J$  7.7 Hz), 7.67 (3H, d,  $J$  6.7 Hz), 7.61 (1H, td,  $J$  7.7, 1.1 Hz), 7.55 (1H, d,  $J$  7.6 Hz), 7.49-7.37 (4H, m), 4.05 (2H, s);  $\delta_C$  (101 MHz,  $CDCl_3$ ): 194.4, 149.8, 138.1, 135.5, 134.9, 134.7, 134.0, 130.8, 129.8, 129.1, 127.8, 126.3, 124.6, 32.6; **HRMS** (ESI+): found 221.0935;  $C_{16}H_{12}OH$ ,  $[M+H]^+$  requires 221.0961, found 441.1826;  $C_{32}H_{12}O_2H$ ,  $[2M+H]^+$  requires 441.1849;  $\nu_{max}$  (neat): 2133.4, 1871.1, 1621.4, 1688.5, 1580.4 1446.2.

*N*-Benzyl isatin (*S1*)

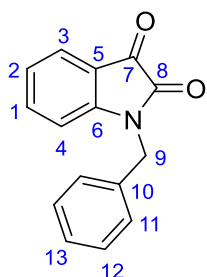

The reaction was carried out according to a literature procedure and the data obtained are consistent with those previously reported.<sup>14</sup>

To a stirred solution of isatin (3.00 g, 20.4 mmol) and potassium carbonate (8.45 g, 61.2 mmol, 3 eq.) in acetonitrile (200 mL) was added benzyl bromide (2.67 mL, 22.4 mmol, 1.1 eq.) dropwise *via* syringe. The reaction was heated to 95 °C and refluxed for 4 h until completion. The mixture was cooled to RT and concentrated *in vacuo*. The crude product was recrystallised from PhMe to afford the product (4.42 g, 91%) as a red-orange crystalline solid. M.p. = 136-139 °C (PhMe).  $\delta_H$  (400 MHz,  $CDCl_3$ ): 7.61 (1H, d,  $J$  7.5 Hz, **H3**), 7.48 (1H, td,  $J$  7.8, 1.3 Hz, **H1**), 7.40-7.27 (5H, m, **H11-13**), 7.09 (1H, td,  $J$  7.5, 0.8 Hz, **H2**), 6.78 (1H, d,  $J$  7.8 Hz, **H4**), 4.93 (2H, s, **H9**);  $\delta_C$  (101 MHz,  $CDCl_3$ ): 183.3 (**C7**), 158.4 (**C8**), 150.9 (**C5/6**), 138.4 (**C1**), 134.7 (**C10**), 129.2 (**C12/13**), 128.3 (**C12/13**), 127.6 (**C11**), 125.5 (**C3**), 123.9 (**C2**), 117.9 (**C5/6**), 111.1 (**C4**), 44.2 (**C9**); **HRMS** (ESI+): found 276.0434;  $C_{15}H_{11}NO_2K$ ,  $[M+K]^+$  requires 276.0421;  $\nu_{max}$  (neat): 1725.8, 1606.5, 1468.6, 1345.6.

(Z)-1-Benzyl-3-((2,2,2-trifluoroethyl)imino)indolin-2-one (1a)

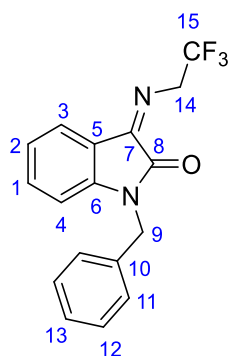

The reaction was carried out according to a literature procedure and the data obtained are consistent with those previously reported.<sup>15</sup>

*N*-benzyl isatin (2.00 g, 8.43 mmol, 1 eq.), 2,2,2-trifluoroethylamine (0.99 mL, 12.6 mmol, 1.5 eq.), *p*-TsOH.H<sub>2</sub>O (0.16 g, 0.843 mmol, 0.1 eq.) and MgSO<sub>4</sub> (3.00 g, 25.3 mmol, 3 eq.) were dissolved in toluene (75 mL) and refluxed in a sealed tube at 120 °C until completion. The solution was cooled to RT, washed with NaHCO<sub>3</sub> (40 mL) and extracted with DCM (2x40 mL). Solvent removed *in vacuo* and the crude residue was recrystallised from MeOH to afford the product (1.96 g, 73%) as an 12:1 mixture of *Z*:*E* isomers as a yellow solid. M.p. = 127-130 °C (MeOH).  $\delta_H$  (400 MHz, CDCl<sub>3</sub>, major isomer): 7.73 (1H, d, *J* 7.5 Hz, **H3**), 7.38-7.29 (6H, m, **H1, H11-13**), 7.09 (1H, t, *J* 7.6 Hz, **H2**), 6.74 (1H, d, *J* 7.8 Hz, **H4**), 4.90 (2H, s, **H9**), 4.87 (2H, q, *J* 9.7 Hz, **H14**);  $\delta_C$  (101 MHz, CDCl<sub>3</sub>): 158.7 (**C8**), 155.7 (**C7**), 145.6 (**C5/6**), 135.1 (**C10**), 133.8 (**C1**), 129.1 (**C12/13**), 128.2 (**C11**), 127.5 (**C12/13**), 125.2 (q, *J*<sub>C-F</sub> 277 Hz, **C15**), 123.6 (**C4**), 123.2 (**C3**), 120.9 (**C5/6**), 109.9 (**C2**) 53.8 (q, *J*<sub>C-F</sub> 31.5 Hz, **C14**), 43.8 (**C9**);  $\delta_F$  (376 MHz, CDCl<sub>3</sub>): -71.9 (t, *J* 9.7 Hz).

*N*-Methyl isatin (*S2*)

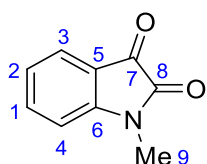

The reaction was carried out according to a literature procedure and the data obtained are consistent with those previously reported.<sup>16</sup>

To a stirred solution of isatin (0.5 g, 3.40 mmol) and potassium carbonate (0.94 g, 6.80 mmol, 2 eq.) in DMF (5 mL) in a sealed tube, was added iodomethane (0.423 mL, 6.80 mmol, 2 eq.) dropwise at RT. The reaction was heated to 40 °C until completion. After 22 h, the mixture was cooled to RT, diluted with DCM (20 mL) and H<sub>2</sub>O (20 mL), extracted and washed with brine (2x20 mL). The mixture was dried

over  $\text{MgSO}_4$ , filtered and concentrated *in vacuo*, affording the product (0.439 g, 80%) as a red-orange solid.  $\delta_{\text{H}}$  (400 MHz,  $\text{CDCl}_3$ ): 7.62-7.56 (2H, m, **H1,3**), 7.11 (1H, t,  $J$  7.8 Hz, **H2**), 6.89 (1H, d,  $J$  7.8 Hz, **H4**), 3.24 (3H, s, **H9**);  $\delta_{\text{C}}$  (101 MHz,  $\text{CDCl}_3$ ): 183.5 (**C7**), 158.4 (**C8**), 151.6 (**C5/6**), 138.5 (**C3**), 125.4 (**C1**), 124.0 (**C2**), 117.6 (**C5/6**), 110.1 (**C4**), 26.3 (**C9**).

*(Z)*-1-Methyl-3-((2,2,2-trifluoroethyl)imino)indolin-2-one (**1b**)

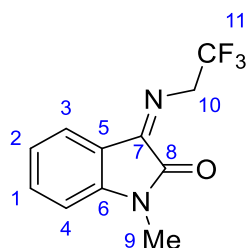

The reaction was carried out by analogy to a literature procedure, and the data obtained are consistent with those previously reported.<sup>15</sup>

*N*-methyl isatin (252 mg, 1.56 mmol, 1 eq.), 2,2,2-trifluoroethylamine (180  $\mu\text{L}$ , 2.29 mmol, 1.5 eq.) and *p*-TsOH $\cdot$ H $_2$ O (11.8 mg, 0.062 mmol, 0.1 eq.) were dissolved in toluene (9 mL) and refluxed in a sealed tube at 120  $^\circ\text{C}$  until completion. After 24 h the solution was cooled to RT, solvent removed *in vacuo* and the crude residue was purified by flash column chromatography (silica gel, petrol:ethyl acetate, 19:1) to afford the product (95.4 mg, 26%) as an 11:1 mixture of Z:E isomers as an orange solid.

$\delta_{\text{H}}$  (400 MHz,  $\text{CDCl}_3$ , major isomer): 7.71 (1H, d,  $J$  7.7 Hz, **H3**), 7.47 (1H, t,  $J$  7.7 Hz, **H1**), 7.12 (1H, t,  $J$  7.5 Hz, **H2**), 6.84 (1H, d,  $J$  7.9 Hz, **H4**), 4.83 (2H, q,  $J$  9.8 Hz, **H10**), 3.22 (3H, s, **H9**);  $\delta_{\text{C}}$  (101 MHz,  $\text{CDCl}_3$ ): 158.8 (**C8**), 155.9 (**C7**), 146.4 (**C5/6**), 133.9 (**C3**), 125.1 (q,  $J_{\text{C-F}}$  276.1 Hz, **C11**), 123.6 (**C2**), 123.1 (**C1**), 120.7 (**C5/6**), 108.9 (**C4**), 53.6 (q,  $J_{\text{C-F}}$  32.3 Hz, **C10**), 26.0 (**C9**); **Major**  $\delta_{\text{F}}$  (376 MHz,  $\text{CDCl}_3$ ): -71.9 (t,  $J$  9.9 Hz).

1-Benzyl-6-chloroindoline-2,3-dione (**S3**)

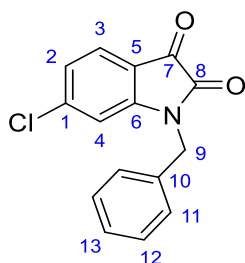

The reaction was carried out according to a literature procedure.<sup>14</sup>

To a stirred solution of 6-chloroisatin (1.00 g, 5.50 mmol, 1 eq.) and potassium carbonate (2.28 g, 16.5 mmol, 3 eq.) in acetonitrile (55 mL) was added benzyl bromide (0.98 mL, 8.26 mmol, 1.1 eq.) dropwise *via* syringe. The reaction was heated to 95 °C and refluxed overnight until completion. The mixture was cooled to RT, filtered under gravity and concentrated *in vacuo*. The crude product was recrystallised from PhMe to afford the product (1.14 g, 76%) as a burnt-orange crystalline solid. M.p. = 175-177 °C (PhMe).  $\delta_H$  (400 MHz, CDCl<sub>3</sub>): 7.54 (1H, d, *J* 8.0 Hz, **H3**), 7.40-7.29 (5H, m, **H11-13**), 7.07 (1H, dd, *J* 8.0, 1.6 Hz, **H2**), 6.78 (1H, d, *J* 1.5 Hz, **H4**), 4.91 (2H, s, **H9**);  $\delta_C$  (101 MHz, CDCl<sub>3</sub>): 181.9 (**C=O**), 158.3 (**C=O**), 151.8 (**C5/6**), 144.8 (**C5/6**), 134.1 (**C10**), 129.3 (**C12/13**), 128.5 (**C12/13**), 127.5 (**C11**), 126.5 (**C3**), 124.2 (**C2**), 116.1 (**C1**), 111.8 (**C4**), 44.3 (**C9**); **HRMS** (ESI<sup>+</sup>): found 272.0478; C<sub>15</sub>H<sub>10</sub>ClNO<sub>2</sub>H, [M+H]<sup>+</sup> requires 272.0472;  $\nu_{\max}$  (neat): 3078.8, 1731.3, 1608.3, 1425.7, 1347.4, 1254.2, 1071.6.

(*Z*)-1-benzyl-6-chloro-3-((2,2,2-trifluoroethyl)imino)indolin-2-one (**1c**)

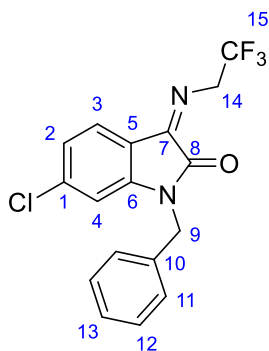

1-benzyl-6-chloroindoline-2,3-dione **S3** (300 mg, 1.10 mmol, 1 eq.), 2,2,2-trifluoroethylamine (0.13 mL, 1.66 mmol, 1.5 eq.), *p*-TsOH.H<sub>2</sub>O (25 mg, 0.13 mmol, 0.12 eq.) and MgSO<sub>4</sub> (500 mg, 4.15 mmol, 3.8 eq.) were dissolved in toluene (10 mL) and refluxed in a sealed tube at 120 °C until completion. The solution was cooled to RT, washed with NaHCO<sub>3</sub> (20 mL) and extracted with DCM (3x15 mL). Solvent removed *in vacuo* and the crude residue was recrystallised from MeOH to afford the product (122 mg, 31 %) as an 75:1 mixture of *Z*:*E* isomers as a mustard-yellow solid. M.p. = 155-157 °C (MeOH).  $\delta_H$  (400 MHz, CDCl<sub>3</sub>, major isomer): 7.65 (1H, d, *J* 8.0 Hz, **H3**), 7.37-7.27 (5H, m, **H11-13**), 7.06 (1H, d, *J* 7.9 Hz, **H2**), 6.74 (1H, s, **H4**), 4.88 (2H, s, **H9**), 4.85 (2H, q, *J* 9.8 Hz, **H14**);  $\delta_C$  (101 MHz, CDCl<sub>3</sub>): 158.6 (**C8**), 154.6 (**C7**), 146.6 (**C5/6**), 139.9 (**C5/6**), 134.6 (**C10**), 129.3 (**Ar**), 128.4 (**Ar**), 127.5 (**Ar**), 125.1 (q, *J*<sub>C-F</sub> 276 Hz, **C15**), 124.3 (**C3**), 123.8 (**C2**), 119.3 (**C1**), 110.6 (**C4**), 53.9 (q, *J*<sub>C-F</sub> 32.5 Hz, **C14**), 43.9 (**C9**);  $\delta_F$  (376 MHz, CDCl<sub>3</sub>): -71.9 (3F, t, *J* 9.7 Hz); **HRMS** (ESI<sup>+</sup>): found 353.0669; C<sub>17</sub>H<sub>12</sub>ClF<sub>3</sub>N<sub>2</sub>O<sub>2</sub>H, [M+H]<sup>+</sup> requires 353.0663;  $\nu_{\max}$  (neat): 2115.3, 1716.4, 1612.1, 1367.9, 1267.3, 1146.2.

1-benzyl-5-methoxyindoline-2,3-dione (**S4**)

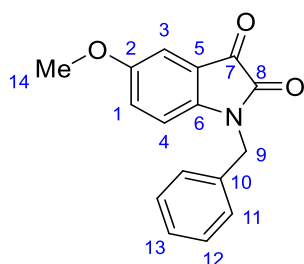

The reaction was carried out according to a literature procedure and the data obtained are consistent with those previously reported.<sup>14</sup>

To a stirred solution of 5-methoxyisatin (1.00 g, 5.64 mmol, 1 eq.) and potassium carbonate (2.34 g, 16.9 mmol, 3 eq.) in acetonitrile (55 mL) was added benzyl bromide (1.00 mL, 8.47 mmol, 1.1 eq.) dropwise *via* syringe. The reaction was heated to 95 °C and refluxed until completion (4 h). The mixture was cooled to RT, filtered under gravity and concentrated *in vacuo*. The crude product was recrystallised from PhMe to afford the product (1.45 g, 96%) as a burgundy crystalline solid. M.p. = 119-121 °C (PhMe).  $\delta_H$  (400 MHz, CDCl<sub>3</sub>): 7.37-7.27 (5H, m, **H11-13**), 7.14 (1H, d, *J* 2.8 Hz, **H3**), 7.02 (1H, dd, *J* 8.6, 2.8 Hz, **H1**), 6.68 (1H, d, *J* 8.6 Hz, **H4**), 4.90 (2H, s, **H9**), 3.76 (3H, s, **H14**);  $\delta_C$  (101 MHz, CDCl<sub>3</sub>): 183.7 (**C=O**), 158.5 (**C=O**), 156.7 (**C2**), 144.7 (**C5/6**), 134.7 (**C10**), 129.1 (**Ar**), 128.2 (**Ar**), 127.5 (**Ar**), 124.8 (**C1**), 118.2 (**C5/6**), 112.1 (**C3**), 109.7 (**C4**), 56.1 (**C14**), 44.2 (**C9**).

(*Z*)-1-benzyl-5-methoxy-3-((2,2,2-trifluoroethyl)imino)indolin-2-one (**1d**)

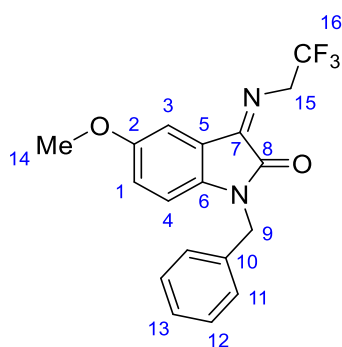

1-benzyl-5-methoxyindoline-2,3-dione **S4** (300 mg, 1.12 mmol, 1 eq.), 2,2,2-trifluoroethylamine (0.15 mL, 1.68 mmol, 1.5 eq.), *p*-TsOH.H<sub>2</sub>O (21 mg, 0.11 mmol, 0.10 eq.) and MgSO<sub>4</sub> (405 mg, 3.37 mmol, 3.0 eq.) were dissolved in toluene (10 mL) and refluxed in a sealed tube at 120 °C until completion (24 h). The solution was cooled to RT, washed with NaHCO<sub>3</sub> (20 mL) and extracted with DCM (3x15 mL). Solvent removed *in vacuo* and the crude residue was recrystallised from MeOH to afford the product (263 mg, 67 %) as an 24:1 mixture of *Z*:*E* isomers as an orange solid. M.p. = 144-147 °C (MeOH).  $\delta_H$  (400 MHz, CDCl<sub>3</sub>, major isomer): 7.39-7.26 (6H, m, **H3 + H11-13**), 6.89 (1H, dd, *J*

8.4, 2.2 Hz, **H1**), 6.63 (1H, d, *J* 8.5 Hz, **H4**), 4.89 (2H, q, *J* 9.7 Hz, **H15**), 4.87 (2H, s, **H9**), 3.79 (3H, s, **H14**);  $\delta_C$  (101 MHz, CDCl<sub>3</sub>): 158.8 (**C=O**), 156.6 (**C2**), 156.1 (**C=O**), 139.4 (**C5/6**), 135.2 (**C10**), 129.1 (**Ar**), 128.1 (**Ar**), 127.5 (**Ar**), 125.2 (q, *J*<sub>C-F</sub> 276.0 Hz, **C16**), 121.6 (**C5/6**), 120.3 (**C1**), 110.8 (**C4**), 108.0 (**C3**), 56.1 (**C14**), 53.7 (q, *J*<sub>C-F</sub> 32.4 Hz, **C15**), 43.8 (**C9**);  $\delta_F$  (376 MHz, CDCl<sub>3</sub>): -71.8 (3F, t, *J* 9.7 Hz); **HRMS** (ESI+): found 349.1164; C<sub>18</sub>H<sub>15</sub>F<sub>3</sub>N<sub>2</sub>O<sub>2</sub>H, [M+H]<sup>+</sup> requires 349.1159;  $\nu_{\max}$  (neat): 3008.0, 2961.4, 2109.7, 1720.2, 1599.0, 1489.1, 1433.3, 1269.2.

### 3.2 Catalyst synthesis

*3-((3,5-Bis(trifluoromethyl)phenyl)amino)-4-ethoxycyclobut-3-ene-1,2-dione (S5)*

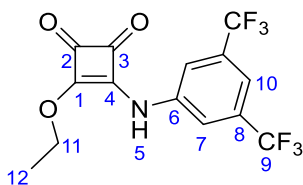

The reaction was carried out according to a literature procedure and the data obtained are consistent with those previously reported.<sup>17</sup>

To a stirred solution of diethyl squarate (1.36 mL, 9.20 mmol) and Zn(OTf)<sub>2</sub> (335 mg, 0.92 mmol, 0.1 eq.) in EtOH (36 mL) at RT, was added 3,5-bis(trifluoromethyl)aniline (1.44 mL, 9.20 mmol, 1 eq.) dropwise *via* syringe. The mixture was left to stir at RT under a flow of argon until consumption of the starting material. After 48 h, the precipitate was filtered, washed with cold EtOH (2 mL), and dried under vacuum. The product (2.36 g, 73%) was obtained as a pale cream solid.  $\delta_H$  (400 MHz, DMSO-d<sub>6</sub>): 11.2 (1H, s, **H5**), 8.04 (2H, s, **H7**), 7.79 (1H, s, **H10**), 4.81 (2H, q, *J* 7.1 Hz, **H11**), 1.42 (3H, t, *J* 7.1 Hz, **H12**);  $\delta_C$  (101 MHz, DMSO-d<sub>6</sub>): 187.9 (**C2/3**), 184.9 (**C2/3**), 179.7 (**C1/4**), 169.6 (**C1/4**), 140.6 (**C6**), 131.1 (q, *J*<sub>C-F</sub> 33.0 Hz, **C8**), 123.0 (q, *J*<sub>C-F</sub> 272.9 Hz, **C9**), 119.9 (**C7**), 116.7 (**C10**), 70.5 (**C11**), 15.8 (**C12**);  $\delta_F$  (376 MHz, DMSO-d<sub>6</sub>): -61.7 (6F, s).

(S)-Quinolin-4-yl((1S,2S,4S,5R)-5-vinylquinuclidin-2-yl)methanamine (S6)

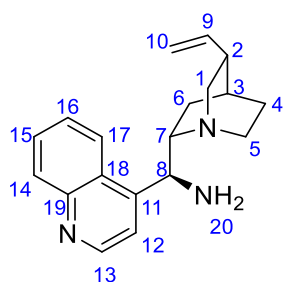

The reaction was carried out according to a literature procedure and the data obtained are consistent with those previously reported.<sup>18</sup>

To a solution of PPh<sub>3</sub> (579 mg, 2.21 mmol, 1.3 eq.) and cinchonidine (500 mg, 1.70 mmol, 1 eq.) in dry THF (10 mL) under argon at 0 °C, was added DIAD (434  $\mu$ L, 2.21 mmol, 1.3 eq.) in one portion. After 15 min, DPPA (475  $\mu$ L, 2.21 mmol, 1.3 eq.) was added dropwise over 15 min and the reaction mixture was heated to 45 °C. After 40 h, PPh<sub>3</sub> (624 mg, 2.38 mmol, 1.4 eq.) was added in one portion and stirred for a further 3 h. The reaction mixture was cooled to RT, diluted with H<sub>2</sub>O (0.5 mL) and stirred for 3 h where-after the crude product was concentrated *in vacuo*. The yellow oil was dissolved in a mixture of DCM:HCl (10% aq. solution) (32 mL) and mixed thoroughly. The aqueous layer was removed and basified to pH 9-10 with aq. NH<sub>4</sub>OH solution. Solution extracted with EtOAc (3x40 mL), organic layers dried over MgSO<sub>4</sub>, filtered, and concentrated *in vacuo*. The crude residue was purified by flash column chromatography (silica gel, EtOAc:MeOH:NH<sub>4</sub>OH, 90:10:2) to afford the product (0.341 g, 68%) as a yellow oil.

$\delta_H$  (600 MHz, CDCl<sub>3</sub>): 8.90 (1H, d, *J* 4.6 Hz, **H12/13**), 8.35 (1H, s, **H14/17**), 8.13 (1H, d, *J* 8.3 Hz, **H14/17**), 7.72 (1H, ddd, *J* 8.4, 6.9, 1.4 Hz, **H15/16**), 7.60 (1H, ddd, *J* 8.3, 7.1, 1.2 Hz, **H15/16**), 7.55-7.49 (1H, m, **H12/13**), 5.84-5.76 (1H, m, **H9**), 4.98 (2H, dd, *J* 20.9, 13.8 Hz, **H10**), 4.71 (1H, s, **H8**), 3.28 (1H, dd, *J* 13.8, 10.1 Hz, **H1'**), 3.24-3.17 (1H, m, **H5'**), 3.07 (1H, s, **H7**), 2.84-2.76 (2H, m, **H1/5**), 2.31-2.24 (1H, m, **H2**), 2.03 (2H, s, **H20**), 1.63-1.60 (1H, m, **H3**), 1.58-1.53 (2H, m, **H4**), 1.45-1.38 (1H, m, **H6'**), 0.75 (1H, dd, *J* 13.8, 7.5 Hz, **H6**);  $\delta_C$  (151 MHz, CDCl<sub>3</sub>): 150.5 (**C12/13**), 148.8 (**C8**), 142.0 (**C9**), 132.2 (**C12/13**), 130.6 (**C14/17**), 129.1 (**C15/16**), 128.7 (**C18/19**), 128.6 (**C18/19**), 128.1 (**C11**), 126.6 (**C15/16**), 123.5 (**C14/17**), 119.7 (**C12/13**), 114.4 (**C10**), 62.2 (**C7**), 56.5 (**C1**), 41.1 (**C5**), 40.1 (**C2**), 28.3 (**C4**), 27.8 (**C3**), 26.3 (**C6**);  $[\alpha]_D^{20}$  +58.7 (*c* = 0.562, CHCl<sub>3</sub>).

Cinchonidine derived aryl-thiourea catalyst (C1)

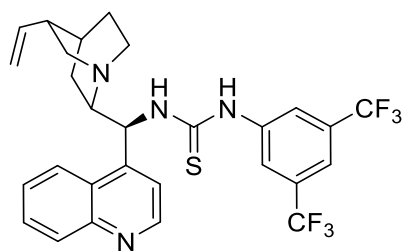

This reaction was carried out according to a literature procedure, and the data obtained are consistent with those previously reported.<sup>19</sup>

A solution of 3,5-bis(trifluoromethyl)phenyl isothiocyanate (0.60 mL, 3.3 mmol, 1.11 eq.) in THF (6 mL) was added slowly to a solution of 9-amino(9-deoxy)epicinchonidine **S6** (870 mg, 2.96 mmol, 1.00 eq.) in THF (20 mL) at room temperature. The reaction mixture was stirred at room temperature for 24 h and evaporated *in vacuo*. The residue was purified by column chromatography on silica gel (10 g) using CH<sub>2</sub>Cl<sub>2</sub>/MeOH/Et<sub>3</sub>N 100/2/1 as eluent to afford an off-white solid (1.83 g, 99 %).

$\delta_H$  (400 MHz, CDCl<sub>3</sub>): 8.86 (1H, d, *J* 3.8 Hz), 8.31 (1H, bs), 8.16 (1H, d, *J* 8.5 Hz), 7.84 (2H, s), 7.76 (1H, t, *J* 7.5 Hz), 7.69 (1H, s), 7.65 (1H, t, *J* 7.7 Hz), 7.32 (1H, d, *J* 4.0 Hz), 5.75-5.62 (2H, m), 5.04-4.95 (2H, m), 3.39-3.17 (3H, m), 2.90-2.76 (2H, m), 2.36 (1H, bs), 1.77-1.60 (3H, m), 1.40-1.31 (1H, m), 1.00-0.90 (1H, m);  $\delta_C$  (101 MHz, CDCl<sub>3</sub>):\* 181.0, 150.1, 148.7, 140.6, 140.0, 132.7 (q, *J*<sub>C-F</sub> 34.1 Hz), 130.6, 129.7, 127.2, 123.6, 123.0, 119.0, 118.9, 115.3, 61.6, 55.0, 41.2, 39.2, 27.5, 27.2, 25.6;  $\delta_F$  (CDCl<sub>3</sub>, 376 MHz): -62.3 (6F, s); **HRMS** (ESI) calcd for C<sub>28</sub>H<sub>27</sub>F<sub>6</sub>N<sub>4</sub>S [M+H]<sup>+</sup>: 565.1860, found: 565.1860; [ $\alpha$ ]<sub>D</sub><sup>20</sup> – 87 (*c* = 1.0, CHCl<sub>3</sub>).

---

\* Signals at ~146 and ~56 ppm were visible as broad humps on the baseline but with insufficient signal:noise to determine precise chemical shift values.



3-((3,5-Bis(trifluoromethyl)phenyl)amino)-4-(((S)-quinolin-4-yl((1S,2S,4S,5R)-5-vinylquinuclidin-2-yl)methyl)amino)cyclobut-3-ene-1,2-dione (**C2**)

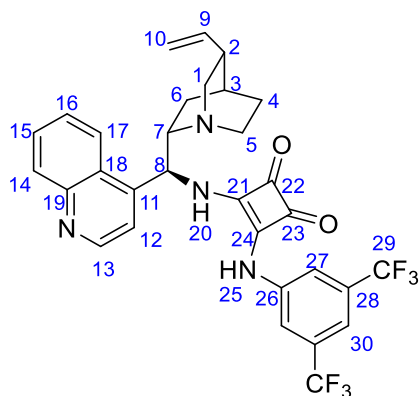

This reaction was carried out according to a literature procedure, and the data obtained are consistent with those previously reported.<sup>20</sup>

To a stirred solution of 3-((3,5-bis(trifluoromethyl)phenyl)amino)-4-ethoxycyclobut-3-ene-1,2-dione (370 mg, 1.05 mmol, 1.2 eq.) in dry MeOH (6 mL) under argon was added (S)-quinolin-4-yl((1S,2S,4S,5R)-5-vinylquinuclidin-2-yl)methanamine (256 mg, 0.872 mmol, 1 eq.) in dry MeOH (4 mL) in one portion. The reaction mixture was stirred for 24 h under Ar at RT after which the precipitate was filtered under vacuum, washed with cold MeOH (2 mL) and dried to afford the product (0.222 g, 42%) as a white solid.

$\delta_H$  (600 MHz, DMSO-d<sub>6</sub>): 10.25 (1H, s, **H20/25**), 8.98 (1H, d, *J* 4.4 Hz, **H12/13**), 8.47 (1H, d, *J* 8.0 Hz, **Ar**), 8.39 (1H, s, **H20/25**), 8.09 (1H, d, *J* 8.3 Hz, **Ar**), 7.98 (2H, s, **H27**), 7.81 (1H, t, *J* 7.7 Hz, **Ar**), 7.74 (1H, t, *J* 7.7 Hz, **Ar**), 7.70 (1H, d, *J* 4.6 Hz, **H12/13**), 7.65 (1H, s, **H30**), 6.06 (1H, s, **H8**), 5.99-5.88 (1H, m, **H9**), 4.99 (2H, dd, *J* 16.8, 10.3 Hz, **H10**), 3.34-3.37 (1H, m, **H7**), 3.30-3.18 (2H, m, **H1'+5'**), 2.71 (1H, d, *J* 13.3 Hz, **H1**), 2.69-2.61 (1H, m, **H5**), 2.28 (1H, s, **H2**), 1.62-1.55 (2H, m, **H3+4'**), 1.54-1.47 (1H, m, **H4**) 1.42-1.33 (1H, m, **H6'**), 0.73 (1H, s, **H6**);  $\delta_C$  (151 MHz, DMSO-d<sub>6</sub>): 184.4 (**C22/23**), 180.3 (**C22/23**), 168.8, 162.7, 150.4 (**C12/13**), 148.1, 145.0 (**Ar**), 142.1 (**C9**), 140.9 (**Ar**), 131.2 (q, *J*<sub>C-F</sub> 33.0 Hz, **C28**), 130.0 (**Ar**), 129.4 (**Ar**), 127.2 (**Ar**), 126.3 (**Ar**), 125.8 (**Ar**), 124.0 (**Ar**), 123.4 (**Ar**), 123.1 (q, *J*<sub>C-F</sub> 273 Hz, **C29**), 120.4 (**C12/13**), 118.3 (**C27**), 114.9 (**C30**), 114.3 (**C10**), 59.5 (**C7**), 55.5 (**C1**), 40.6 (**C5**), 39.5 (**C2**)\*, 27.2 (**C4**), 25.7 (**C6**);  $\delta_F$  (376 MHz, DMSO-d<sub>6</sub>): -61.7 (6F, s);  $[\alpha]_D^{20}$  -82.9 (*c* = 0.9, DMSO).

\* Carbon peak at **C2** is obscured by the DMSO peak, but is visible in the HSQC spectrum

(S)-N-Benzhydryl-2-((2-((3,5-bis(trifluoromethyl)phenyl)amino)-3,4-dioxocyclobut-1-en-1-yl)amino)-N,3,3-trimethylbutanamide (C3)

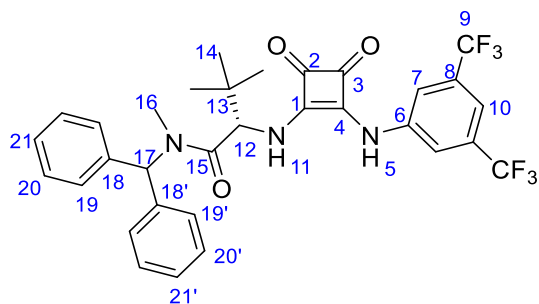

The reaction was carried out according to a literature procedure and the data obtained are consistent with those previously reported.<sup>21</sup>

To a stirred solution of *N*-methylbenzhydrylamine (200 mg, 1.01 mmol, 1.1 eq.), HBTU (383 mg, 1.01 mmol, 1.1 eq.) and *N*-Boc-L-tert-leucine (213 mg, 0.918 mmol, 1 eq.) in dry DCM (15 mL) was added *i*-Pr<sub>2</sub>NEt (191 μL, 1.1 mmol, 1.2 eq.) dropwise. The reaction mixture was stirred at RT under Ar until completion. After 5 d, the reaction mixture was washed with 1M HCl (2x25 mL) and extracted with Et<sub>2</sub>O (40 mL). The organic layers were washed with aq. NaHCO<sub>3</sub> (2x25 mL) and brine (2x25 mL), dried over MgSO<sub>4</sub>, filtered, and concentrated *in vacuo*. HCl (4M in dioxane, 2.5 mL) was added dropwise to the amide at 0 °C, stirred for 2 h at RT and concentrated to produce the amine hydrochloride. DCM (8 mL) and Et<sub>3</sub>N (0.4 mL, 2.75 mmol, 3 eq.) were added and stirred for 15 min before addition of 3-((3,5-Bis(trifluoromethyl)phenyl)amino)-4-ethoxycyclobut-3-ene-1,2-dione (325 mg, 0.918 mmol, 1 eq.) in one portion. The reaction mixture was stirred at RT for 48 h where after NaOH (1N, 8 mL) was added and stirred for a further 4 h at RT. Reaction mixture was diluted with DCM (12.5 mL) and H<sub>2</sub>O (12.5 mL), washed with brine (15 mL), dried over MgSO<sub>4</sub>, filtered and concentrated. The crude residue was purified by flash column chromatography (PhMe:EtOAc, 20:1) to afford the product (73.8 mg, 13%) as a white solid.

$\delta_H$  (400 MHz, CDCl<sub>3</sub>, exists as  $\approx$  5:1 rotamers, resonance of major reported): 10.1 (1H, s, **NH**), 7.92-7.77 (2H, s, **Ar**), 7.54 (1H, s, **NH**), 7.39-7.32 (4H, m, **Ar**), 7.24-7.17 (5H, m, **Ar**), 7.00-6.93 (3H, m, **Ar**), 5.58-5.46 (1H, m, **H12**), 2.99 (3H, s, **H16**), 1.07 (9H, s, **H14**);  $\delta_C$  (101 MHz, CDCl<sub>3</sub>): 171.4, 169.2, 161.8, 139.8, 138.1, 137.8, 137.2, 133.1 (q,  $J_{C-F}$  34.0 Hz), 129.4, 129.0, 128.7, 128.5, 128.2, 122.8 (q,  $J_{C-F}$  273 Hz), 118.9, 61.5, 60.4, 36.9, 33.4, 26.1; \*  $\delta_F$  (376 MHz, CDCl<sub>3</sub>): -62.9 (6F, s); [ $\alpha$ ]<sub>D</sub><sup>20</sup> -48.2 (c = 0.28, CHCl<sub>3</sub>).

\* Three <sup>13</sup>C signals are not observed, likely due to co-incidence between diastereotopic groups (e.g. 21 and 21').

1,1'-((1*R*,2*R*)-1,2-Diphenylethane-1,2-diyl)bis(3-(3,5-bis(trifluoromethyl)phenyl)thiourea) (C4)

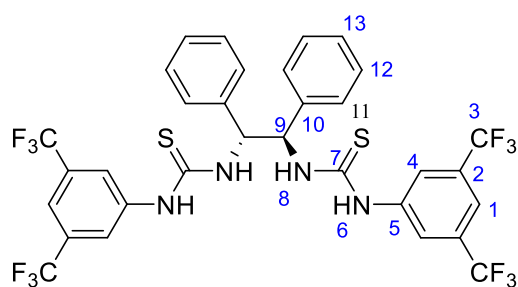

The reaction was carried out by analogy to a literature procedure and the data obtained are consistent with those previously reported.<sup>22,23</sup>

Isothiocyanato-3,5-bistrifluoromethylbenzene (344  $\mu$ L, 1.88 mmol, 2 eq.) was added dropwise over 2 min to a stirred solution of (1*R*,2*R*)-DPEN (200 mg, 0.942 mmol, 1 eq.) in dry THF (2.5 mL) at 0 °C. The reaction mixture was heated to RT and stirred under a constant flow of argon. After 24 h the THF was removed *in vacuo*. The crude yellow residue was purified by flash column chromatography (silica gel, DCM:MeOH, 95:5) to afford the product (530 mg, 75%) as a white solid.

$\delta_H$  (400 MHz, DMSO-*d*<sub>6</sub>): 10.3 (2H, s, **H6**), 8.73 (2H, s, **H8**), 8.16 (4H, s, **H4**), 7.69 (2H, s, **H1**), 7.30 – 7.18 (10H, m, **H11–13**), 5.96 (2H, s, **H9**);  $\delta_C$  (101 MHz, DMSO-*d*<sub>6</sub>): 180.4 (**C7**), 141.5 (**Ar**), 138.4 (**Ar**), 130.2 (q,  $J_{C-F}$  32.8 Hz, **C2**), 128.3 (**Ar**), 128.0 (**Ar**), 127.6 (**Ar**), 121.9 (**C4**), 121.7 (q,  $J_{C-F}$  272.9 Hz, **C3**), 116.4 (**C1**), 62.6 (**C9**);  $\delta_F$  (376 MHz, DMSO-*d*<sub>6</sub>): -61.8 (s);  $[\alpha]_D^{20}$  - 39.9 ( $c = 0.8$ , CHCl<sub>3</sub>).

*N*-((4*S*,5*S*)-4,5-Diphenylimidazolidin-2-ylidene)-3,5-bis(trifluoromethyl)aniline (C5)

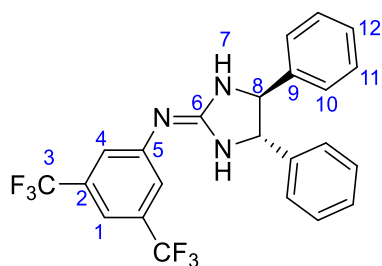

To a stirred solution of (1*R*,2*R*)-DPEN (200 mg, 0.942 mmol, 1 eq.) in dry THF (1.5 mL) was added a solution of isothiocyanato-3,5-bistrifluoromethylbenzene (172  $\mu$ L, 0.942 mmol, 1 eq.) in dry THF (1 mL) dropwise over 30 min at 0 °C *via* syringe pump. The reaction mixture is stirred at RT for 24 h where after the solvent was removed *in vacuo*. The crude yellow oil was purified by flash column chromatography (silica gel, Petrol:EtOAc:NEt<sub>3</sub>, 20:1:0.01  $\rightarrow$  10:1:0.01) to afford the product (67.5 mg, 16%) as a white solid.

$\delta_H$  (400 MHz, DMSO-d6): 7.46 (2H, s, **H7**), 7.40-7.26 (13H, m, **H1+4+10-12**), 4.54 (2H, s, **H8**);  
 $\delta_C$  (101 MHz, DMSO-d6): 157.6 (**C6**), 141.9 (**C5**), 131.1 (q,  $J_{C-F}$  32.0 Hz, **C2**), 129.0 (**C10**), 128.2 (**Ar**),  
127.1 (**Ar**), 124.1 (q,  $J_{C-F}$  273 Hz, **C3**), 112.6 (**C1**), 67.2 (**C8**), possible overlapping with two carbons as  
speaks is short one peak;  $\delta_F$  (376 MHz, DMSO-d6): -61.4 (6F, s);  $[\alpha]_D^{20}$  -72.2 ( $c = 0.266$ ,  $\text{CHCl}_3$ ); **HRMS**  
(ESI+): found 450.1334;  $\text{C}_{23}\text{H}_{18}\text{F}_6\text{N}_3$ ,  $[\text{M}+\text{H}]^+$  requires 450.1327;  $\nu_{\text{max}}$  (neat): 3028.5, 2844.0, 1664.3,  
1595.3, 1382.8, 1271.0, 1170.4, 1129.4, 698.9, 680.2.

### 3.3 Spirooxindole products

#### ***General procedure for the synthesis of spiro[pyrrolidine-oxindoles]***

To a stirred solution of imine (**1a/1b**) (1 eq.) and benzylidene derivatives (1.2 eq.) in DCM (0.1 M) was added catalyst **C1** (0.1 eq.) in one portion. The reaction mixture was stirred under air at RT and monitored by TLC. Upon completion, the solvent was removed *in vacuo* and the crude residue was purified by flash column chromatography to afford the product.

#### ***A Note on Purification***

In some instances, residual benzylidinemalononitriles present upon completion of the reaction underwent hydrolysis during silica gel chromatography leading to contamination of the product with the corresponding aldehydes. These were removed by dissolving the product in methanol (5 mL), transferring the solution to a separatory funnel, adding saturated aqueous sodium bisulfite (1 mL) and shaking for 30 seconds. The solution was then diluted with water (25 mL) and extracted with CHCl<sub>3</sub> (25 mL). The aqueous layer was then extracted three times with chloroform (5 mL). Following this the organic layers were combined, dried over MgSO<sub>4</sub>, filtered under gravity, and then concentrated *in vacuo*. This procedure was adapted from Furigay *et al.*<sup>24</sup>

#### ***A Note on Relative and Absolute Configuration***

All spirocyclization reactions produced at least two diastereomeric products identifiable from the crude <sup>1</sup>H NMR spectra. In most cases these diastereomers were not separable by chromatography. The relative and absolute stereochemistry of the major diastereomers of all products are assumed to be analogous to the crystal structure obtained for (–)-**3d** (see the main text and section 6 below). With the exception of **3l** and **5b** (which contain an additional stereocentre not common to the other compounds synthesised), we assume the minor diastereomer to be consistent with the following analysis for **3k**.

The relative configuration of the minor diastereomer of **3k** was identified through NOESY analysis (Figure S1). In a mixture containing ~1:1 major:minor diastereomer, a strong nOe enhancement was observed between the *ortho*-CH of the oxindole (H3) and the benzylidene hydrogen (H13), consistent with the C(13)-H(13) and C(7)-C(5) bonds being *syn* relative to the pyrrolidine ring. The presence of strong enhancements between H<sup>15</sup> and H<sup>11</sup> for both diastereomers indicates that the CF<sub>3</sub> and Ph groups are *anti* for both the major and minor diastereomers. It should be noted that the absolute stereochemistry of the minor diastereomer is not known.

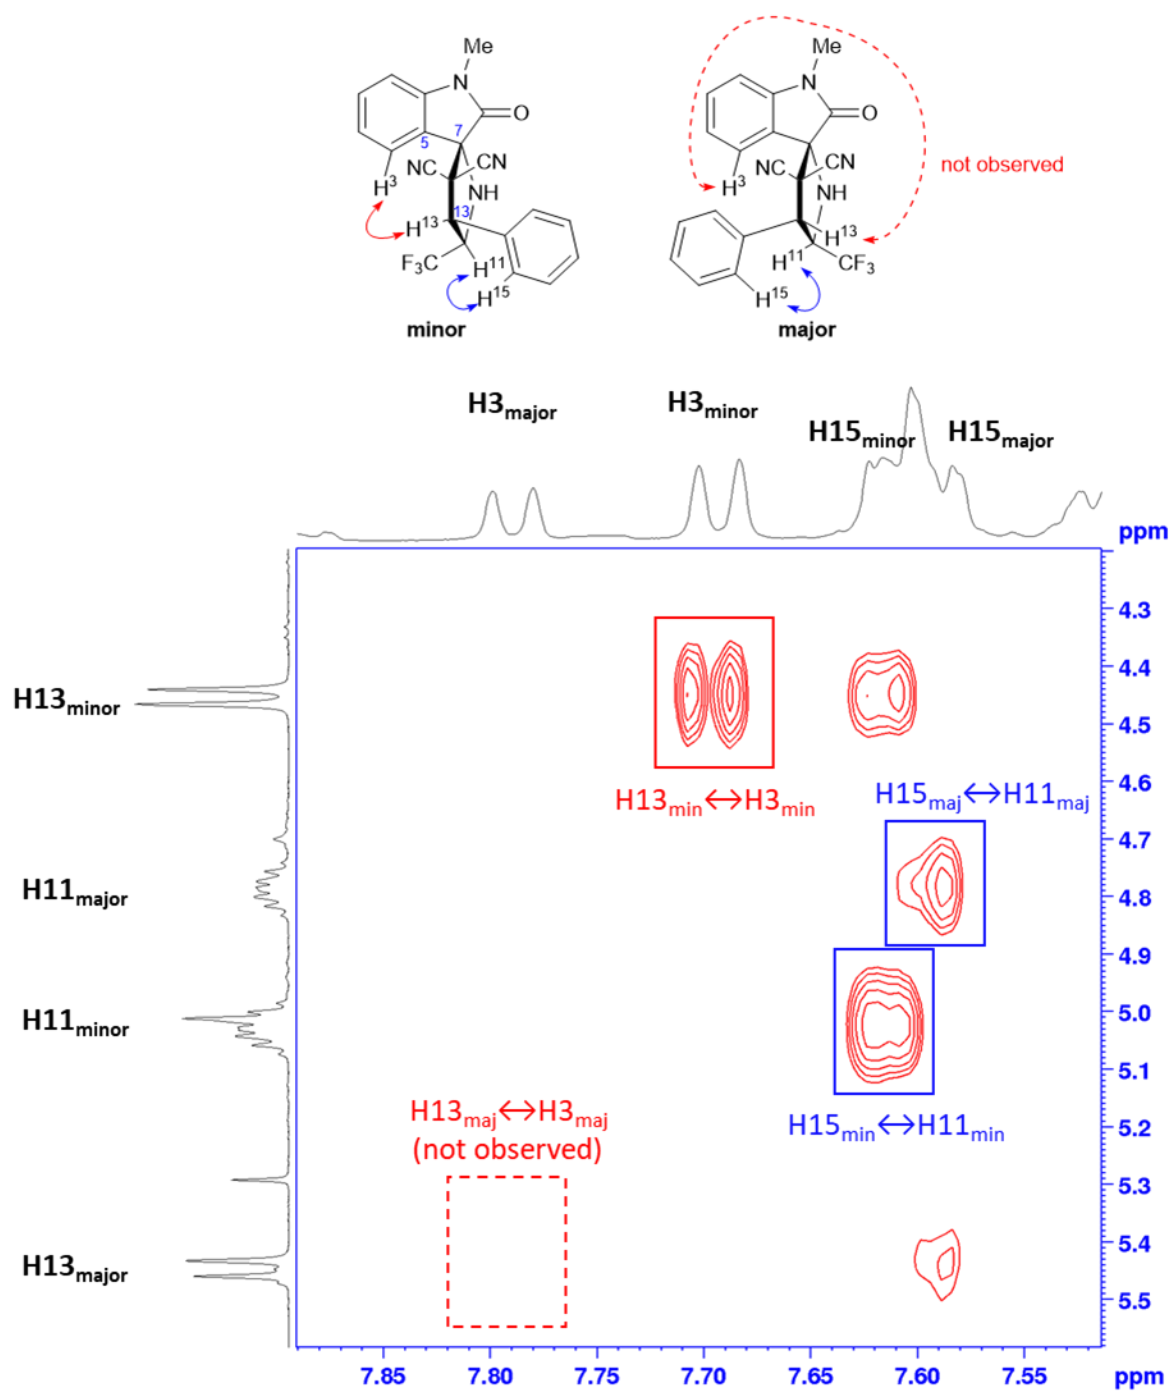

Figure S1. NOESY analysis of spirocycle **3k** (CDCl<sub>3</sub>, 400 MHz,  $t_{mix}$  0.3 s).

1-Benzyl-2-oxo-4'-phenyl-5'-(trifluoromethyl)spiro[indoline-3,2'-pyrrolidine]-3',3'-dicyanitrile (**3a**)

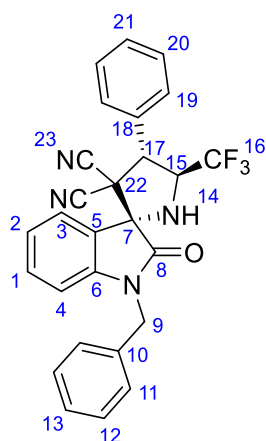

**1a** (50 mg, 0.157 mmol, 1 eq.), **2a** (29.1 mg, 0.188 mmol, 1.2 eq.) and **C1** (8.9 mg, 0.016 mmol, 0.1 eq.) after 1 day afforded the spirocycle (71.3 mg, 96%, 91% ee, 12:1 d.r.) as a white foam solid. Crude was purified using 1% acetone in toluene. Yield of 250 mg scale, (366 mg, 96%, 90% ee, 6.7:1 d.r.).

**Major**  $\delta_H$  (400 MHz,  $CDCl_3$ ): 7.80 (1H, d,  $J$  7.8 Hz, **H3**), 7.65-7.60 (2H, m, **H19**), 7.52-7.47 (3H, m, **H20-21**), 7.41-7.26 (6H, m, **H1+11-13**), 7.19 (1H, t,  $J$  7.6 Hz, **H2**), 6.80 (1H, d,  $J$  7.9 Hz, **H4**), 5.52 (1H, d,  $J$  10.8 Hz, **H17**), 5.22 (1H, d,  $J$  15.5 Hz, **H9'**), 4.85-4.76 (1H, m, **H15**), 4.69 (1H, d,  $J$  15.6 Hz, **H9**), 2.90 (1H, d,  $J$  7.5 Hz, **H14**); **Major**  $\delta_C$  (101 MHz,  $CDCl_3$ ): 173.5 (**C8**), 143.8 (**C10**), 134.6 (**Ar**), 132.5 (**C1**), 130.3 (**Ar**), 129.6 (**Ar**), 129.5 (**C18**), 129.2 (**Ar**), 129.1 (**Ar**), 128.2 (**Ar**), 127.7 (**Ar**), 125.1 (**C3**), 124.0 (**C2**), 122.1 (**Ar**), 111.4 (**C23'**), 111.3 (**C23**), 110.6 (**C4**), 70.7 (**C7**), 60.1 (q,  $J_{C-F}$  32.2 Hz, **C15**), 51.8 (**C17**), 51.6 (**C22**), 44.8 (**C9**);\* **Major**  $\delta_F$  (376 MHz,  $CDCl_3$ ): -73.5 (3F, d,  $J$  6.2 Hz);  $[\alpha]_D^{20}$  -34.8 ( $c$  = 0.94,  $CHCl_3$ ); **HRMS** (ESI+): found 473.1589;  $C_{27}H_{19}F_3N_4OH$ ,  $[M+H]^+$  requires 473.1584;  $\nu_{max}$  (neat): 3371.4, 1709.0, 1612.1, 1287.8, 1140.6, 1094.0, 751.1, 695.1; **HPLC**: Chiral art Amylose-SA (with column guard), 15% IPA-hexane 1.0 mL/min,  $\lambda$  = 254 nm,  $t_R$  (major) = 19.8 min,  $t_R$  (minor) = 10.5 min.

---

\* **C16** not observed due to low signal intensity.

1-Benzyl-4'-(4-methoxyphenyl)-2-oxo-5'-(trifluoromethyl)spiro[indoline-3,2'-pyrrolidine]-3',3'-dicarbonitrile (**3b**)

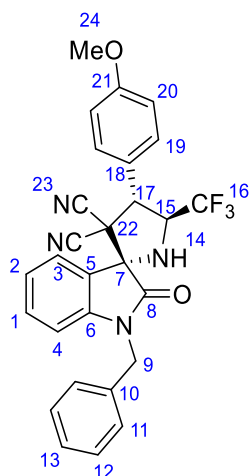

**1a** (50 mg, 0.157 mmol, 1 eq.), **2b** (46 mg, 0.187 mmol, 1.2 eq.) and **C1** (9 mg, 0.0159 mmol, 0.1 eq.) after 3 days afforded the spirocycle (77 mg, 98%, 93% ee, 2.8:1 d.r.) as a white foam solid. Crude was purified using 0.5% acetone in toluene.

**Major  $\delta_H$**  (400 MHz,  $CDCl_3$ ):\* 7.79 (1H, d,  $J$  7.7 Hz, **H3**), 7.54 (2H, d,  $J$  8.7 Hz, **Ar**), 7.41-7.31 (6H, m, **H1+H11-13**), 7.18 (1H, t,  $J$  7.7 Hz, **H2**), 7.01 (2H, d,  $J$  8.8 Hz, **Ar**), 6.79 (1H, d,  $J$  7.9 Hz, **H4**), 5.47 (1H, d,  $J$  10.8 Hz, **H17**), 5.21 (1H, d,  $J$  15.7 Hz, **H9'**), 4.78-4.71 (1H, m, **H15**), 4.68 (1H, d,  $J$  15.6 Hz, **H9**), 3.84 (3H, s, **H24**), 2.87 (1H, m, **H14**); **Minor  $\delta_H$**  (400 MHz,  $CDCl_3$ ):<sup>††</sup> 7.69 (1H, d,  $J$  7.6 Hz, **H3**), 7.56 (2H, m, **Ar**), 7.41-7.31 (6H, m, **H1+H11-13**), 7.22 (1H, d,  $J$  7.5 Hz, **H2**), 6.99 (2H, d,  $J$  9.0 Hz, **Ar**), 6.83 (1H, d, 7.8 Hz, **H4**), 5.12 (1H, d,  $J$  15.8 Hz, **H9'**), 5.06-4.96 (1H, m, **H15**), 4.82 (1H, d,  $J$  15.6 Hz, **H9**), 4.43 (1H, d,  $J$  10.0 Hz, **H17**), 3.83 (3H, s, **H24**), 3.13 (1H, m, **H14**); **Major  $\delta_C$**  (101 MHz,  $CDCl_3$ ): 173.6 (**C8**), 161.0 (**C21**), 143.8 (**Ar**), 134.6 (**C10**), 132.5 (**Ar**), 130.3 (**Ar**), 129.1 (**Ar**), 128.2 (**Ar**), 127.7 (**Ar**), 125.1 (**C3**), 124.0 (**C2**), 122.3 (**Ar**), 121.3 (**Ar**), 114.9 (**Ar**), 111.6 (**C23'**), 111.5 (**C23**), 110.5 (**C4**), 70.4 (**C7**), 60.2 (q,  $J_{C-F}$  32.2 Hz, **C15**), 55.5 (**C24**), 51.8 (**C22**), 51.4 (**C17**), 44.8 (**C9**);<sup>†</sup> **Major  $\delta_F$**  (376 MHz,  $CDCl_3$ ): -73.4 (3F, d,  $J$  5.9 Hz), **Minor  $\delta_F$**  (376 MHz,  $CDCl_3$ ): -73.3 (3F, d,  $J$  6.0 Hz);  **$[\alpha]_D^{20}$**  -28.6 ( $c$  = 1.06,  $CHCl_3$ ); **HRMS** (ESI+): found 503.1695;  $C_{28}H_{21}F_3N_4O_2H$ ,  $[M+H]^+$  requires 503.1690;  **$\nu_{max}$**  (neat): 3358.3, 1718.3, 1610.2, 1513.3, 1256.1, 1177.8, 1140.6, 752.9, 697.0; **HPLC**: Chiral art Amylose-SA (with column guard), 15% IPA-hexane 1.0 mL/min,  $\lambda$  = 254 nm,  $t_R$  (major) = 19.3 min,  $t_R$  = (minor) 13.7 min.

\* Due to significant overlapping in the aromatic region, integration of certain multiplets was inaccurate although where possible, assignment was made *via* 2D analysis.

<sup>†</sup> **C16** not observed due to low signal intensity.



1-Benzyl-4'-(4-nitrophenyl)-2-oxo-5'-(trifluoromethyl)spiro[indoline-3,2'-pyrrolidine]-3',3'-dicarbonitrile (**3c**)

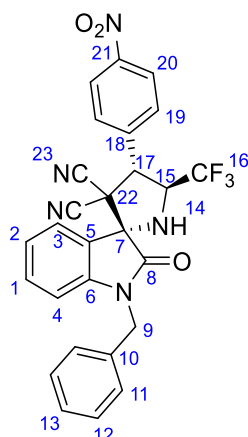

**1a** (51 mg, 0.160 mmol, 1 eq.), **2c** (38 mg, 0.192 mmol, 1.2 eq.) and **C1** (9 mg, 0.0159 mmol, 0.1 eq.) after 2 days afforded the spirocycle (63 mg, 76%, 97% ee, 48.8:1 d.r.) as a faint-orange foam solid. Crude was purified using 1% acetone in toluene.

**Major  $\delta_H$**  (400 MHz,  $CDCl_3$ ): 8.37 (2H, d,  $J$  8.8 Hz, **Ar**), 7.82 (2H, d,  $J$  8.8 Hz, **Ar**), 7.80 (1H, d,  $J$  7.6 Hz, **H3**), 7.43-7.27 (6H, m, **H1 + H11-13**), 7.20 (1H, t,  $J$  7.7 Hz, **H2**), 6.83 (1H, d,  $J$  7.9 Hz, **H4**), 5.66 (1H, d,  $J$  10.7 Hz, **H17**), 5.21 (1H, d,  $J$  15.6 Hz, **H9'**), 4.90-4.80 (1H, m, **H15**), 4.71 (1H, d,  $J$  15.6 Hz, **H9**), 2.97 (1H, d,  $J$  7.6 Hz, **H14**); **Major  $\delta_C$**  (101 MHz,  $CDCl_3$ ): 173.3 (**C8**), 149.2 (**C21**), 143.8 (**Ar**), 136.6 (**C18**), 134.3 (**Ar**), 132.8 (**Ar**), 130.3 (**Ar**), 129.2 (**Ar**), 128.3 (**Ar**), 127.7 (**Ar**), 125.1 (**C3**), 124.6 (**Ar**), 124.2 (**C2**), 121.5 (**Ar**), 111.0 (**C23'**), 110.9 (**C23**), 110.8 (**C4**), 70.8 (**C7**), 60.2 (q,  $J_{C-F}$  32.8 Hz, **C15**), 51.1 (**C17 & C22**), 44.8 (**C9**); **Major  $\delta_F$**  (376 MHz,  $CDCl_3$ ): -73.5 (3F, d,  $J$  6.1 Hz);  **$[\alpha]_D^{20}$**  -42.5 ( $c = 1.00$ ,  $CHCl_3$ ); **HRMS** (ESI+): found 503.1440;  $C_{27}H_{18}F_3N_5O_3H$ ,  $[M+H]^+$  requires 518.1435;  **$\nu_{max}$**  (neat): 3352.7, 1720.2, 1608.3, 1522.6, 1345.5, 1284.4, 1140.6; **HPLC**: Chiral art Amylose-SB (with column guard), 20% IPA-hexane 1.0 mL/min,  $\lambda = 254$  nm,  $t_R$  (major) = 15.0 min,  $t_R$  (minor) = 12.8 min.

\* No peak visible corresponding to **C22** likely due to co-incidence with another peak.

† As indicated by HMBC and HSQC spectra.

‡ **C16** not observed due to low signal intensity.

1-Benzyl-4'-(naphthalen-2-yl)-2-oxo-5'-(trifluoromethyl)spiro[indoline-3,2'-pyrrolidine]-3',3'-dicarbonitrile (**3d**)

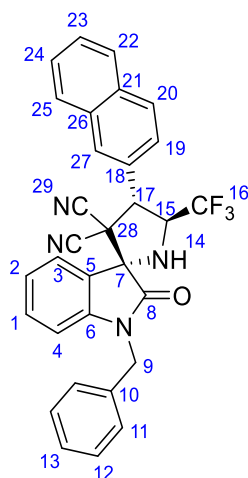

**1a** (50 mg, 0.158 mmol, 1 eq.), **2d** (38 mg, 0.187 mmol, 1.2 eq.) and **C1** (9 mg, 0.0160 mmol, 0.1 eq.) after 1 day afforded the spirocycle (78 mg, 95%, 87% ee, 10.1:1 d.r.) as a white foam solid. Crude was purified using 1% acetone in toluene.

**Major  $\delta_H$**  (400 MHz,  $CDCl_3$ ): 8.13 (1H, s, **H25**), 7.99 (1H, d,  $J$  8.7 Hz, **Ar**), 7.96-7.87 (2H, m, **Ar**), 7.83 (1H, d,  $J$  7.6 Hz, **H3**), 7.72 (1H, d,  $J$  8.5, **Ar**), 7.59-7.54 (2H, m, **Ar**), 7.44-7.29 (6H, m, **H11+11-13**), 7.20 (1H, t,  $J$  7.8 Hz, **H2**), 6.81 (1H, d,  $J$  7.9 Hz, **H4**), 5.72 (1H, d,  $J$  10.7 Hz, **H17**), 5.25 (1H, d,  $J$  15.7 Hz, **H9**), 5.00-4.92 (1H, m, **H15**), 4.71 (1H, d,  $J$  15.6 Hz, **H9'**), 2.98 (1H, d,  $J$  7.5 Hz, **H14**); **Major  $\delta_C$**  (101 MHz,  $CDCl_3$ ): 173.6 (**C8**), 143.8 (**Ar**), 134.6 (**Ar**), 134.1 (**Ar**), 133.4 (**Ar**), 132.6 (**Ar**), 129.4 (**Ar**), 129.1 (**Ar**), 128.8 (**Ar**), 128.5 (**Ar**), 128.2 (**Ar**), 127.9 (**Ar**), 127.7 (**Ar**), 127.4 (**Ar**), 127.0 (**Ar<sub>q</sub>**), 126.9 (**Ar**), 125.4 (**Ar**), 125.1 (**C3**), 124.0 (**C2**), 122.1 (**Ar<sub>q</sub>**), 111.5 (**C29'**), 111.4 (**C29**), 110.6 (**C4**), 70.8 (**C7**), 60.2 (q,  $J_{C-F}$  31.7 Hz, **C15**), 52.0 (**C17**), 51.6 (**C28**), 44.8 (**C9**);\* **Major  $\delta_F$**  (376 MHz,  $CDCl_3$ ): -73.4 (3F, d,  $J$  5.8 Hz);  $[\alpha]_D^{20}$  -19.8 ( $c$  = 0.95,  $CHCl_3$ ); **HRMS** (ESI+): found 523.1746;  $C_{31}H_{21}F_3N_4OH$ ,  $[M+H]^+$  requires 523.1740;  $\nu_{max}$  (neat): 3360.2, 1710.8, 1612.1, 1468.6, 1366.1, 1285.9, 1138.7; **HPLC**: Chiral art Amylose-SB (with column guard), 20% IPA-hexane 1.0 mL/min,  $\lambda$  = 254 nm,  $t_R$  (major) = 11.8 min,  $t_R$  (minor) = 9.4 min.

\* **C16** not observed due to low signal intensity.

1-benzyl-2-oxo-4'-(*o*-tolyl)-5'-(trifluoromethyl)spiro[indoline-3,2'-pyrrolidine]-3',3'-dicarbonitrile (**3e**)

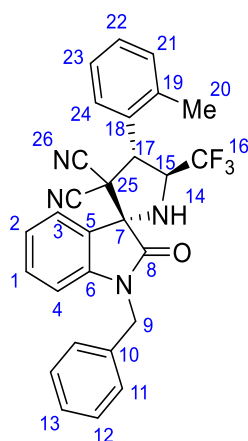

**1a** (51.3 mg, 0.161 mmol, 1 eq.), **3e** (33.0 mg, 0.196 mmol, 1.2 eq.) and Catalyst **C1** (9 mg, 0.0159 mmol, 0.1 eq.) after 2 days afforded the spirocycle (72.0 mg, 92 %, 83% ee, 4.0:1 d.r.) as a white solid. Crude was purified using 1% acetone in toluene.

**Major  $\delta_H$**  (600 MHz,  $CDCl_3$ ): 7.83 (1H, d,  $J$  7.6 Hz, **H3**), 7.74-7.71 (1H, m, **Ar**), 7.39-7.31 (9H, m, **Ar** + **H1**), 7.19 (1H, t,  $J$  7.6 Hz, **H2**), 6.78 (1H, d,  $J$  7.8 Hz, **H4**), 6.14 (1H, d,  $J$  10.8 Hz, **H17**), 5.21 (1H, d,  $J$  15.8 Hz, **H9'**), 4.72 (1H, d,  $J$  15.8 Hz, **H9**), 4.70-4.64 (1H, m, **H15**), 2.88 (1H, d,  $J$  7.4 Hz, **H14**), 2.64 (3H, s, **H20**); **Major  $\delta_C$**  (151 MHz,  $CDCl_3$ ): 173.7 (**C8**), 143.9 (**Ar**), 139.1 (**Ar**), 134.6 (**Ar**), 132.5 (**Ar**), 131.8 (**Ar**), 129.8 (**Ar**), 129.1 (**Ar**), 128.2 (**Ar**), 127.9 (**Ar**), 127.6 (**Ar**), 127.4 (**Ar**), 126.8 (**Ar**), 125.2 (**C3**), 124.0 (**C2**), 122.2 (**Ar**), 111.7 (**C26** & **C26'**), 110.6 (**C24**), 71.0 (**C22**), 61.3 (q,  $J_{C-F}$  32.1 Hz, **C15**), 50.2 (**C25**), 46.1 (**C7**), 44.8 (**C9**), 20.0 (**C20**);\* **Major  $\delta_F$**  (564 MHz,  $CDCl_3$ ): -73.7 (3F, d,  $J$  6.2 Hz);  **$[\alpha]_D^{20}$**  -6.4 ( $c$  = 1.07,  $CHCl_3$ ); **HRMS** (ESI+): found 487.1746;  $C_{28}H_{21}F_3N_4OH$ ,  $[M+H]^+$  requires 487.1734;  **$\nu_{max}$**  (thin film): 3362.1, 1722.0, 1610.2, 1490.9, 1367.9, 1282.2, 1144.3, **HPLC**: Chiral art Amylose-SA (with column guard), 20% IPA-hexane 1.0 mL/min,  $\lambda$  = 254 nm,  $t_R$  (major) = 11.3 min,  $t_R$  (minor) = 6.6 min.

\* **C16** not observed due to low signal intensity.

1-Benzyl-4'-(2-bromophenyl)-2-oxo-5'-(trifluoromethyl)spiro[indoline-3,2'-pyrrolidine]-3,3'-dicarbonitrile (**3f**)

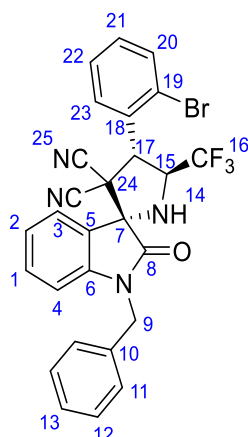

**1a** (76 mg, 0.239 mmol, 1 eq.), **2f** (67 mg, 0.300 mmol, 1.2 eq.) and **C1** (14 mg, 0.0248 mmol, 0.1 eq.) after 3 days afforded the spirocycle (113 mg, 86%, 80% ee, 9.9:1 d.r.) as a white foam solid. Crude was purified using 1% acetone in toluene.

**Major  $\delta_H$**  (600 MHz,  $CDCl_3$ ): 7.82 (1H, d,  $J$  8.0 Hz, **H3**), 7.78 (1H, dd,  $J$  8.0, 1.2 Hz **Ar**), 7.76 (1H, dd,  $J$  8.0, 1.2 Hz, **Ar**), 7.48 (1H, td,  $J$  7.5, 1.2 Hz, **Ar**), 7.41-7.32 (6H, m, **H1+ Ar**), 7.28 (1H, m, **Ar**), 7.19 (1H, td,  $J$  7.7, 0.7 Hz, **H2**), 6.78 (1H, d,  $J$  7.9 Hz, **H4**), 6.56 (1H, d,  $J$  10.8 Hz, **H17**), 5.22 (1H, d,  $J$  15.7 Hz, **H9'**), 4.74 (1H, d,  $J$  15.7 Hz, **H9**), 4.68-4.62 (1H, m, **H15**), 2.89 (1H, d,  $J$  7.5 Hz, **H14**); **Major  $\delta_C$**  (151 MHz,  $CDCl_3$ ): 173.3 (**C8**), 144.0 (**Ar**), 134.6 (**Ar**), 134.4 (**Ar**), 132.6 (**Ar**), 131.4 (**Ar**), 129.5 (**Ar**), 129.2 (**Ar**), 129.1 (**Ar**), 128.2 (**Ar**), 128.1 (**Ar**), 127.7 (**Ar**), 127.2 (**C10**), 125.1 (**C3**), 123.9 (**C2**), 121.9 (**Ar**), 111.6 (**C25'**), 110.9 (**C25**), 110.7 (**C4**), 71.1 (**C7**), 61.5 (q,  $J_{C-F}$  32.1 Hz, **C15**), 50.0 (**C24**), 48.7 (**C17**), 44.8 (**C9**);\* **Major  $\delta_F$**  (564 MHz,  $CDCl_3$ ): -73.6 (d,  $J$  6.1 Hz);  **$[\alpha]_D^{20}$**  +15.6 ( $c = 1.01$ ,  $CHCl_3$ ); **HRMS** (ESI+): found 589.0242;  $C_{27}H_{18}BrF_3N_4OK$ ,  $[M+K]^+$  requires 589.0246;  **$\nu_{max}$**  (neat): 3350.9, 1718.3, 1612.1, 1470.4, 1282.2, 1172.2, 1142.4; **HPLC**: Chiral art Amylose-SA (with column guard), 20% IPA-hexane 1.0 mL/min,  $\lambda = 254$  nm,  $t_R$  (major) = 13.7 min,  $t_R$  (minor) = 9.9 min.

\* **C16** not observed due to low signal intensity.

1-Benzyl-4'-(4-chlorophenyl)-2-oxo-5'-(trifluoromethyl)spiro[indoline-3,2'-pyrrolidine]-3',3'-dicarbonitrile (**3g**)

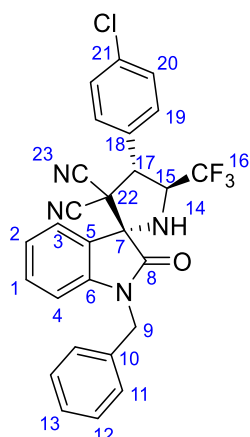

**1a** (102 mg, 0.321 mmol, 1 eq.), **2g** (73 mg, 0.384 mmol, 1.2 eq.) and **C1** (19 mg, 0.0337 mmol, 0.1 eq.) after 1 day afforded the spirocycle (147 mg, 90%, 93% ee, 8.6:1 d.r.) as a white foam solid. Crude was purified using 1% acetone in toluene.

**Major  $\delta_H$**  (400 MHz,  $CDCl_3$ ): 7.79 (1H, d,  $J$  7.8 Hz, **H3**), 7.58-7.54 (2H, m, **Ar**), 7.51-7.47 (2H, m, **Ar**), 7.41-7.32 (6H, m, **H1**, **H11-13**), 7.19 (1H, td,  $J$  7.9, 1.0 Hz, **H2**), 6.81 (1H, d,  $J$  7.9 Hz, **H4**), 5.50 (1H, d,  $J$  10.7 Hz, **H17**), 5.21 (1H, d,  $J$  15.5 Hz, **H9'**), 4.78-4.72 (1H, m, **H15**), 4.69 (1H, d,  $J$  15.7 Hz, **H9**), 2.89 (1H, d,  $J$  7.6 Hz, **H14**); **Major  $\delta_C$**  (101 MHz,  $CDCl_3$ ): 173.4 (**C8**), 143.8 (**Ar**), 136.5 (**C21**), 134.5 (**C10**), 132.6 (**Ar**), 130.4 (**Ar**), 129.8 (**Ar**), 129.2 (**Ar**), 128.3 (**Ar**), 128.1 (**C18**), 127.7 (**Ar**), 125.1 (**C3**), 124.1 (**C2**), 121.9 (**Ar**), 111.3 (**C23'**), 111.2 (**C23**), 110.7 (**C4**), 70.6 (**C7**), 60.1 (q,  $J_{C-F}$  32.6 Hz, **C15**), 51.4 (**C22**), 51.2 (**C17**), 44.8 (**C9**);\* **Major  $\delta_F$**  (376 MHz,  $CDCl_3$ ): -73.4 (3F, d,  $J$  6.1 Hz);  **$[\alpha]_D^{20}$**  -37.2 ( $c$  = 0.98,  $CHCl_3$ ); **HRMS** (ESI+): found 545.0747;  $C_{27}H_{18}ClF_3N_4OK$ ,  $[M+K]^+$  requires 545.0758;  **$\nu_{max}$**  (neat): 3363.9, 1710.8, 1612.1, 1490.9, 1280.3, 1140.6, 1094.0; **HPLC**: Chiral art Amylose-SA (with column guard), 15% IPA-hexane 1.0 mL/min,  $\lambda$  = 254 nm,  $t_R$  (major) = 18.7 min,  $t_R$  (minor) = 16.7 min.

\* **C16** not observed due to low signal intensity.

1-Benzyl-2-oxo-5'-(trifluoromethyl)-4'-(3,4,5-trimethoxyphenyl)spiro[indoline-3,2'-pyrrolidine]-3,3'-dicarbonitrile (**3h**)

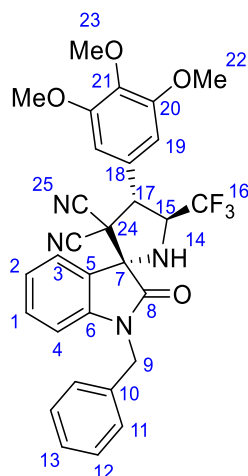

**1a** (51 mg, 0.160 mmol, 1 eq.), **2h** (47 mg, 0.192 mmol, 1.2 eq.) and **C1** (9 mg, 0.0160 mmol, 0.1 eq.) after 3 days afforded the spirocycle (75 mg, 84%, 92% ee, 7.3:1 d.r.) as a white foam solid. Crude was purified using 1% acetone in toluene.

**Major  $\delta_H$**  (400 MHz,  $CDCl_3$ ): 7.79 (1H, d,  $J$  7.9 Hz, **H3**), 7.41-7.31 (6H, m, **H1+H11-13**), 7.20 (1H, t,  $J$  7.7, **H2**), 6.81 (3H, m, **H4+H19**), 5.43 (1H, d,  $J$  10.8 Hz, **H17**), 5.23 (1H, d,  $J$  15.7 Hz, **H9'**), 4.79-4.71 (1H, m, **H15**), 4.68 (1H, d,  $J$  15.6 Hz, **H9**), 3.92 (6H, s, **H22**), 3.90 (3H, s, **H23**), 2.89 (1H, d,  $J$  7.6 Hz, **H14**); **Major  $\delta_C$**  (101 MHz,  $CDCl_3$ ): 173.6 (**C8**), 153.8 (**Ar**), 143.8 (**Ar**), 139.5 (**Ar**), 134.5 (**Ar**), 132.6 (**Ar**), 129.2 (**Ar**), 128.3 (**Ar**), 127.7 (**Ar**), 125.1 (**C3**), 124.8 (**Ar**), 124.1 (**C2**), 122.1 (**Ar**), 111.7 (**C25'**), 111.6 (**C25**), 110.7 (**C4**), 106.2 (**C19**), 70.7 (**C7**), 61.1 (**C23**), 60.3 (q,  $J_{C-F}$  31.9 Hz, **C15**), 56.5 (**C22**), 52.3 (**C17**), 51.6 (**C24**), 44.8 (**C9**);\* **Major  $\delta_F$**  (376 MHz,  $CDCl_3$ ): -73.5 (3F, d,  $J$  6.1 Hz);  $[\alpha]_D^{20}$  -36.7 ( $c$  = 0.98,  $CHCl_3$ ); **HRMS** (ESI+): found 601.1465;  $C_{30}H_{23}F_3N_4O_4K$ ,  $[M+K]^+$  requires 601.1460;  $\nu_{max}$  (neat): 3326.6, 2931.6, 1710.8, 1593.4, 1464.8, 1284.1, 1250.5, 1125.7; **HPLC**: Chiral art Amylose-SA (with column guard), 15% IPA-hexane 1.0 mL/min,  $\lambda$  = 254 nm,  $t_R$  (major) = 20.7 min,  $t_R$  (minor) = 9.9 min.

\* **C16** not observed due to low signal intensity.

1-Benzyl-4'-(furan-2-yl)-2-oxo-5'-(trifluoromethyl)spiro[indoline-3,2'-pyrrolidine]-3',3'-dicarbonitrile (3i)

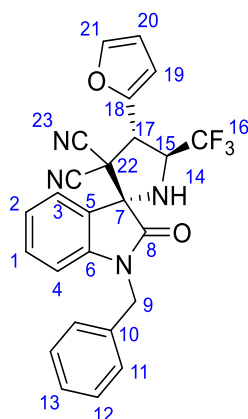

**1a** (50.6mg, 0.159 mmol, 1 eq.), **2i** (27.6 mg, 0.192 mmol, 1.2 eq.) and **C1** (9 mg, 0.0194 mmol, 0.1 eq.) after 1 day afforded the spirocycle (55 mg, 75 %, 91% ee, 16:1 d.r.) as a yellow solid. Crude was purified using 1% acetone in toluene.

**Major  $\delta_H$**  (600 MHz,  $CDCl_3$ ): 7.79 (1H, d,  $J$  7.8 Hz, **H3**), 7.56 (1H, d,  $J$  1.5 Hz, **Ar**), 7.40-7.27 (6H, m, **H1** + **H11-13**), 7.18 (1H, t,  $J$  7.7 Hz, **H2**), 6.79 (1H, d,  $J$  7.7 Hz, **H4**), 6.68 (1H, d,  $J$  3.4 Hz, **H19**), 6.48 (1H, dd,  $J$  3.3, 1.9 Hz, **H20**), 5.62 (1H, d,  $J$  10.7 Hz, **H17**), 5.19 (1H, d,  $J$  15.7 Hz, **H9'**), 4.87-4.80 (1H, m, **H15**), 4.69 (1H, d,  $J$  15.7 Hz, **H9**), 2.94 (1H, d,  $J$  7.9 Hz, **H14**); **Major  $\delta_C$**  (151 MHz,  $CDCl_3$ ): 173.4 (**C8**), 144.7 (**Ar**), 143.9 (**C10**), 143.8 (**C18**), 134.5 (**Ar**), 132.6 (**Ar**), 129.1 (**Ar**), 128.2 (**Ar**), 127.7 (**Ar**), 125.1 (**C3**), 124.0 (**C2**), 121.7 (**Ar**), 111.9 (**Ar**), 111.3 (**C23'**), 111.3 (**C20**), 111.2 (**C23**), 110.6 (**C4**), 70.6 (**C7**), 59.8 (q,  $J_{C-F}$  32.3 Hz, **C15**), 49.6 (**C22**), 46.6 (**C17**), 44.7 (**C9**);\* **Major  $\delta_F$**  (564 MHz,  $CDCl_3$ ): -74.0 (3F, d,  $J$  5.6 Hz);  **$[\alpha]_D^{20}$**  -43.2 ( $c = 1.02$ ,  $CHCl_3$ ); **HRMS** (ESI+): found 463.1382;  $C_{25}H_{17}F_3N_4O_2H$ ,  $[M+H]^+$  requires 463.1377;  **$\nu_{max}$**  (thin film): 3358.3, 2228.9, 1718.3, 1610.2, 1490.9, 1371.7, 1289.7, 1140.6; **HPLC**: Chiral art Amylose-SA (with column guard), 15% IPA-hexane 1.0 mL/min,  $\lambda = 254$  nm,  $t_R$  (major) = 19.2 min,  $t_R$  (minor) 9.2 min.

\* **C16** not observed due to low signal intensity.

(*E*)-1-benzyl-2-oxo-4'-styryl-5'-(trifluoromethyl)spiro[indoline-3,2'-pyrrolidine]-3',3'-dicyanitrile (**3j**)

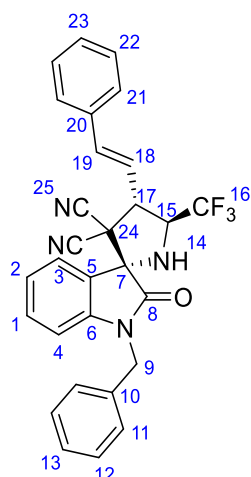

**1a** (50.0 mg, 0.157 mmol, 1 eq.), **2j** (34.0 mg, 0.189 mmol, 1.2 eq.) and **C1** (9 mg, 0.0159 mmol, 0.1 eq.) after 3 days afforded the spirocycle (52 mg, 67 %, 94% ee, 11.5:1 d.r.) as a yellow solid. Crude was purified using 1% acetone in toluene.

**Major  $\delta_H$**  (600 MHz,  $CDCl_3$ ): 7.77 (1H, d, *J* 7.6 Hz, **H3**), 7.51-7.47 (2H, m, **Ar**), 7.41-7.30 (9H, m, **Ar+H1**), 7.18 (1H, t, *J* 7.7 Hz, **H2**), 7.02 (1H, d, *J* 15.8 Hz, **H19**), 6.79 (1H, d, *J* 7.7 Hz, **H4**), 6.30 (1H, dd, *J* 15.8, 9.3 Hz, **H18**), 5.20 (1H, d, *J* 15.8 Hz, **H9'**), 5.01 (1H, t, *J* 9.9 Hz, **H17**), 4.67 (1H, d, *J* 15.7 Hz, **H9**), 4.36-4.26 (1H, m, **H15**), 2.18 (1H, d, *J* 7.8 Hz, **H14**); **Major  $\delta_C$**  (151 MHz,  $CDCl_3$ ): 173.5 (**C8**), 143.8 (**Ar**), 140.2 (**C19**), 135.4 (**Ar**), 134.6 (**Ar**), 132.5 (**Ar**), 129.2 (**Ar**), 129.1 (**Ar**), 128.9 (**Ar**), 128.2 (**Ar**), 127.7 (**Ar**), 127.3 (**Ar**), 125.0 (**C3**), 124.0 (**C2**), 122.0 (**Ar**), 118.0 (**C18**), 114.4 (**C25**), 113.3 (**C25**), 110.6 (**C4**), 70.5 (**C7**), 62.0 (q, *J*<sub>C-F</sub> 31.6 Hz, **C15**), 51.0 (**C22**), 50.2 (**C17**), 44.8 (**C9**); \* **Major  $\delta_F$**  (564 MHz,  $CDCl_3$ ): -74.0 (3F, d, *J* 6.5); [ $\alpha$ ]<sub>D</sub><sup>20</sup> -19.8 (*c* = 0.5,  $CHCl_3$ ); **HRMS** (ESI<sup>+</sup>): found 499.1746;  $C_{29}H_{21}F_3N_4OH$ , [M+H]<sup>+</sup> requires 499.1740;  **$\nu_{max}$**  (thin film): 3362.1, 2228.9, 1722.0, 1610.2, 1490.9, 1289.7, 1170.4, 1144.3; **HPLC**: Chiral art Amylose-SA (with column guard), 15% IPA-hexane 1.0 mL/min,  $\lambda$  = 254 nm, *t*<sub>R</sub> (major) = 15.3 min, *t*<sub>R</sub> (minor) = 8.8 min.

---

\* **C16** not observed due to low signal intensity.



1-Methyl-2-oxo-4'-phenyl-5'-(trifluoromethyl)spiro[indoline-3,2'-pyrrolidine]-3',3'-dicarbonitrile (**3k**)

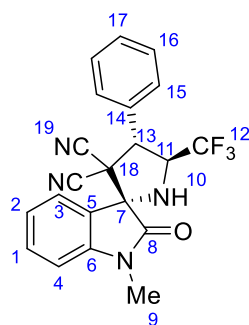

**1b** (50 mg, 0.206 mmol, 1 eq.), **2a** (38 mg, 0.248 mmol, 1.2 eq.) and **C1** (12 mg, 0.0206 mmol, 0.1 eq.) after 3 days afforded the spirocycle (63 mg, 77%, 85% ee, 2.0:1 d.r.) as a cream coloured glassy solid residue. Crude was purified using 1% acetone in toluene.

**Major  $\delta_H$**  (400 MHz,  $CDCl_3$ ): 7.79 (1H, d,  $J$  7.7 Hz, **H3**), 7.61-7.57 (2H, m, **H15**), 7.53-7.46 (4H, m, **H1+16+17**), 7.22 (1H, td,  $J$  7.8, 1.1 Hz, **H2**), 6.93 (1H, d,  $J$  7.8 Hz, **H4**), 5.44 (1H, d,  $J$  10.7 Hz, **H13**), 4.84-4.74 (1H, m, **H11**), 3.27 (3H, s, **H9**), 2.98 (1H, d,  $J$  7.5 Hz, **H10**); **Minor  $\delta_H$**  (400 MHz,  $CDCl_3$ ):\* 7.69 (1H, d,  $J$  7.6 Hz, **H3**), 7.61-7.57 (m, **Ar**), 7.53-7.46 (m, **Ar**), 7.28 (1H, dd,  $J$  7.8 Hz, 1.0 Hz, **H2**), 6.97 (1H, d,  $J$  7.8 Hz, **H4**), 5.07-4.98 (1H, m, **H11**), 4.45 (1H, d,  $J$  10.3 Hz, **H13**), 3.29 (3H, s, **H9**), 3.32-3.17 (1H, m, **H10**); **Major  $\delta_C$**  (101 MHz,  $CDCl_3$ ):<sup>†</sup> 173.4 (**C8**), 144.5 (**Ar**), 132.6 (**C1**), 130.2 (**Ar**), 129.5 (**Ar**), 129.0 (**Ar**), 125.0 (**C3**), 124.0 (**C2**), 122.0 (**Ar**), 111.3 (**C19'**), 111.2 (**C19**), 109.5 (**C4**), 70.9 (**C7**), 60.1 (q,  $J_{C-F}$  31.3 Hz, **C11**), 51.7 (**C13**), 51.6 (**C18**), 26.8 (**C9**);<sup>‡</sup> **Minor  $\delta_C$**  (101 MHz,  $CDCl_3$ ): 173.3 (**C8**), 143.3 (**Ar**), 132.6 (**Ar**), 132.1 (**Ar**), 130.3 (**Ar**), 130.1 (**Ar**), 129.5 (**Ar**), 129.3 (**Ar**), 126.1 (**Ar**), 125.6 (**Ar**), 124.2 (**Ar**), 112.5 (**C19'**), 110.4 (**C19**), 109.6 (**C4**), 72.3 (**C7**), 61.2 (q,  $J_{C-F}$  32.4 Hz, **C11**), 55.5 (**C13**), 51.5 (**C18**), 27.3 (**C9**); **Major  $\delta_F$**  (376 MHz,  $CDCl_3$ ): -73.5 (3F, d,  $J$  6.1 Hz); **Minor  $\delta_F$**  (376 MHz,  $CDCl_3$ ): -74.3 (3F, d,  $J$  5.9 Hz); **Sole Major diastereomer  $[\alpha]_D^{20}$**  -71.4 ( $c$  = 1.01,  $CHCl_3$ ); **Mix of diastereomers  $[\alpha]_D^{20}$**  -25.5 ( $c$  = 1.01,  $CHCl_3$ ); **HRMS** (ESI+): found 397.1276;  $C_{21}H_{15}F_3N_4OH$ ,  $[M+H]^+$  requires 397.1271;  $\nu_{max}$  (thin film): 3365.8, 2926.0, 1718.3, 1613.9, 1289.7, 1170.4, 1140.6; **HPLC**: Chiral art Amylose-SA (with column guard), 15% IPA-hexane 1.0 mL/min,  $\lambda$  = 254 nm,  $t_R$  (major) = 13.3 min,  $t_R$  (minor) = 8.7 min.

\* Due to significant overlapping in the aromatic region, integration of certain multiplets was inaccurate and therefore excluded although where possible, assignment was made *via* 2D analysis.

<sup>†</sup> A small amount of the major diastereomer was able to separated whilst the other fraction contained both diastereomers, therefore assignment was made by subtracting the peaks not present in the major diastereomer spectra

<sup>‡</sup> **C14** and **C16** not observed due to low signal intensity.

*Ethyl-1-benzyl-3'-cyano-2-oxo-4'-phenyl-5'-(trifluoromethyl)spiro[indoline-3,2'-pyrrolidine]-3'-carboxylate (3l)*

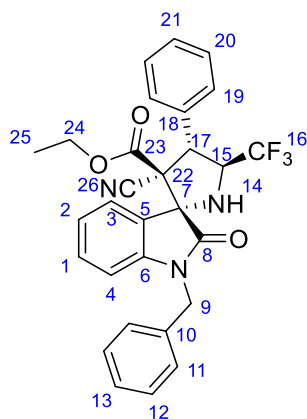

Major diastereomer

**1a** (50 mg, 0.157 mmol, 1 eq.), **2l** (38 mg, 0.189 mmol, 1.2 eq.) and **C1** (9 mg, 0.0160 mmol, 0.1 eq.) after 3 days afforded the spirocycle (78 mg, 95%, 94% ee, 1.8:1:0.05 or 1:0.41:0.02)\* as a yellow solid. Crude was purified using 0.5→1% acetone in toluene.

**Major**  $\delta_H$  (400 MHz,  $CDCl_3$ ):<sup>†</sup> 7.91 (1H, dd, *J* 7.6 Hz, 0.8 Hz, **H3**), 7.65 (m, **Ar**), 7.41-7.27 (m, **Ar**), 7.17 (1H, td, *J* 7.6, 0.9 Hz, **H2**), 6.80 (1H, d, *J* 7.9 Hz, **H4**), 5.43 (1H, d, *J* 10.9 Hz, **H17**), 5.07 (1H, d, *J* 15.6 Hz, **H9'**), 4.76-4.66 (1H, m, **H15**), 4.61 (1H, d, *J* 15.4 Hz, **H9**), 3.79 (1H, dq, *J* 10.7, 7.1 Hz, **H24'**), 3.68 (1H, dq, *J* 10.7, 7.1 Hz, **H24**), 2.79 (1H, d, *J* 8.0 Hz, **H14**), 0.72 (3H, t, *J* 7.2 Hz, **H25**); **Minor**  $\delta_H$  (400 MHz,  $CDCl_3$ ):<sup>‡</sup> 7.78 (1H, d, *J* 7.5 Hz, **H3**), 7.41-7.27 (m, **Ar**), 7.09 (1H, td, *J* 7.8, 0.9 Hz, **H2**), 6.78 (1H, m, **H4**), 5.17 (1H, d, *J* 15.6 Hz, **H9'**), 4.89-4.81 (1H, m, **H15**), 4.76-4.66 (2H, m, **H9+H17**), 3.66-3.55 (2H, m, **H24**), 2.79 (1H, d, *J* 8.2 Hz, **H14**), 0.56 (3H, t, *J* 7.2 Hz, **H25**);  $\delta_C$  (101 MHz,  $CDCl_3$ ):<sup>§</sup> 174.5 (**C8**, **Min**), 174.3 (**C8**, **Maj**), 163.4 (**C23**, **Min**), 162.5 (**C23**, **Maj**), 143.8, 142.6, 135.5, 135.0, 132.2, 132.1, 131.4, 130.8, 130.0, 129.9, 129.2, 129.1, 129.0, 128.8, 128.7, 128.2, 128.1, 128.0, 127.4, 125.8, 125.0, 124.6, 123.5, 123.4, 115.2, 114.1, 109.7, 109.4, 72.3(**C7**, **Min**), 70.0 (**C7**, **Maj**), 63.7 (**C22**, **Min**), 63.5 (**C22**, **Maj**), 63.3 (**C24**, **Min**), 63.2 (**C24**, **Maj**), 62.7 (q, *J*<sub>C-F</sub> 30.4 Hz, **C15**, **Min**), 61.8 (q, *J*<sub>C-F</sub> 31.3 Hz, **C15**, **Maj**), 51.2 (**C17**, **Min**), 49.0 (**C17**, **Maj**), 44.9 (**C9**, **Min**), 44.5 (**C9**, **Maj**), 13.4 (**C25**, **Maj**), 13.2 (**C25**, **Min**);\*\* **Major**  $\delta_F$  (376 MHz,  $CDCl_3$ ): -73.4 (3F, d, *J* 6.4 Hz); **Minor**  $\delta_F$  (376 MHz,  $CDCl_3$ ): -74.4 (3F, d, *J* 6.0 Hz);  $[\alpha]_D^{20}$  -42.1 (*c* = 1.02,  $CHCl_3$ ); **HRMS** (ESI+): found 558.1405;  $C_{29}H_{24}F_3N_3O_3K$ ,  $[M+K]^+$  requires 558.1402;  $\nu_{max}$  (neat): 3330.4,

\* A further minor diastereomer can be observed in the crude NMR.

† Due to significant overlapping in the aromatic region, integration of certain multiplets was inaccurate and therefore excluded although where possible, assignment was made *via* 2D analysis.

‡ H17 peak is absent in minor due to being buried in 4.76-4.66 multiplet, observed *via* 2D analysis

§ Due to the small d.r. complete assignment of the individual diastereomer carbon peaks are not given, but assignment of certain peaks has been given where possible *via* 2D NMR.

\*\* **C16** not observed due to low signal intensity.

1720.2, 1237.5, 1164.8, 1136.8, 752.9, 697.0; **HPLC**: Chiral art Amylose-SA (with column guard), 15% IPA-hexane 1.0 mL/min,  $\lambda = 254$  nm,  $t_R$  (major) = 18.9 min,  $t_R$  (minor) = 9.8 min.

The relative and absolute configuration of the major diastereomer (–)-**31**<sub>maj</sub> was determined by single crystal x-ray diffraction (see section 6.2 below).

1-Benzyl-2-oxo-4'-phenyl-5'-(trifluoromethyl)spiro[indoline-3,2'-pyrrolidine]-3',3'-dicarbonitrile (**3m**)

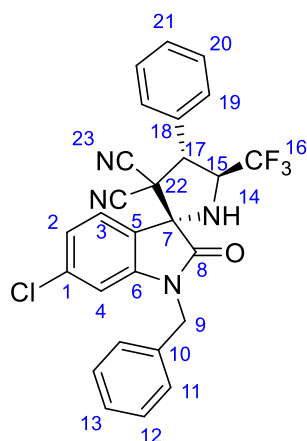

**1c** (50 mg, 0.142 mmol, 1 eq.), **2a** (26.2 mg, 0.170 mmol, 1.2 eq.) and **C1** (8.0 mg, 0.014 mmol, 0.1 eq.) after 1 day afforded the spirocycle (66.8 mg, 93%, 89% ee, 2.3:1 d.r.) as a pink foam solid. Crude was purified using 0.5% acetone in toluene.

**Major  $\delta_H$**  (600 MHz,  $CDCl_3$ ):\* 7.72 (1H, d,  $J$  8.2 Hz, **H3**), 7.63-7.58 (m, **Ar**), 7.51-7.47 (m, **Ar**), 7.40-7.34 (5H, m, **H11-13**), 7.16 (1H, dd,  $J$  8.1, 1.8 Hz, **H2**), 6.80 (1H, d,  $J$  1.8 Hz, **H4**), 5.46 (1H, d,  $J$  10.7 Hz, **H17**), 5.19 (1H, d,  $J$  15.7 Hz, **H9'**), 4.82-4.76 (1H, m, **H15**), 4.66 (1H, d,  $J$  15.7 Hz, **H9**), 2.87 (1H, d,  $J$  7.3 Hz, **H14**); **Minor  $\delta_H$**  (600 MHz,  $CDCl_3$ ): 7.63-7.58 (m, **H3 + Ar**), 7.33-7.29 (5H, m, **H11-13**), 7.20 (1H, dd,  $J$  8.1, 1.9 Hz, **H2**), 6.83 (1H, d,  $J$  1.7 Hz, **H4**), 5.11 (1H, d,  $J$  15.7 Hz, **H9'**), 5.09-5.04 (1H, m, **H15**), 4.77 (1H, d,  $J$  15.5 Hz, **H9**), 4.40 (1H, d,  $J$  10.1 Hz, **H17**), 3.10 (1H, d,  $J$  6.5 Hz, **H14**); **Major  $\delta_C$**  (151 MHz,  $CDCl_3$ ):<sup>†,‡</sup> 173.7 (**C8 Min**), 173.4 (**C8, Maj**), 145.0 (**C5/6, Maj**), 143.8 (**C5/6, Min**), 138.8 (**C1, Maj**), 138.2 (**C1, Min**), 134.8, 134.0, 133.8, 130.9, 130.4, 130.3, 130.1, 129.8, 129.6, 129.5, 129.42, 129.37, 129.34, 129.29, 129.0, 128.6, 128.5, 127.7, 127.5, 126.9, 126.2 (**C3, Maj**), 124.2 (**C2, Min**), 124.0 (**C2, Maj**), 120.4 (**C5/6, Maj**), 111.28 (**C4, Min**), 111.24 (**C23, Maj**), 111.23 (**C4, Maj**), 110.4 (**C23, Min**), 72.0 (**C7, Min**), 70.4 (**C7, Maj**), 61.3 (q,  $J_{C-F}$  30.0 Hz, **C15, Min**), 60.0 (q,  $J_{C-F}$  32.1 Hz, **C15, Maj**), 55.7 (**C22, Min**), 51.7 (**C22, Maj**), 45.0 (**C9, Min**), 44.9 (**C9, Maj**); **Major  $\delta_F$**  (564 MHz,  $CDCl_3$ ): -73.5 (3F, d,  $J$  6.0 Hz); **Minor  $\delta_F$**  (564 MHz,  $CDCl_3$ ): -74.1 (3F, d,  $J$  5.7 Hz);  **$[\alpha]_D^{20}$**  -33.2 ( $c = 1.00$ ,  $CHCl_3$ ); **HRMS** (ESI+): found 507.1199;  $C_{27}H_{18}ClF_3N_4OH$ ,  $[M+H]^+$  requires 507.1193;  $\nu_{max}$  (film): 3339.7, 2922.2, 2253.2, 1720.2, 1608.3, 1490.9, 1284.1, 1142.4; **HPLC**: Chiral ART Amylose-SB (with column guard), 20% IPA-hexane 1.0 mL/min,  $\lambda = 254$  nm,  $t_R$  (major) = 13.1 min,  $t_R$  (minor) = 7.6 min.

\* Due to significant overlapping of major and minor diastereomers in the aromatic region, integration of certain multiplets was inaccurate and therefore omitted. Where possible, assignment was made *via* 2D analysis.

† Due to the low d.r. complete assignment of the individual diastereomer carbon peaks are not given, but assignment of certain peaks has been given where possible via 2D NMR.

‡ **C16** not observed due to low signal intensity.

1-Benzyl-5-methoxy-2-oxo-4'-phenyl-5'-(trifluoromethyl)spiro[indoline-3,2'-pyrrolidine]-3',3'-dicarbonitrile (**3n**)

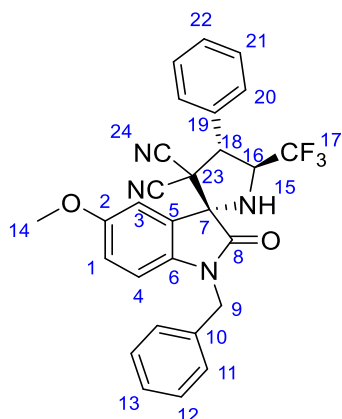

**1d** (50 mg, 0.144 mmol, 1 eq.), **2a** (26.6 mg, 0.172 mmol, 1.2 eq.) and **C1** (8.1 mg, 0.014 mmol, 0.1 eq.) after 1 day afforded the spirocycle (70.8 mg, 98%, 93% ee, 8.2:1 d.r.) as a white foam solid. Crude was purified using 0.5% acetone in toluene.

**Major  $\delta_H$**  (600 MHz,  $CDCl_3$ ): 7.63-7.60 (2H, m, **H20/21/22**), 7.51-7.47 (3H, m, **H20/21/22**), 7.40 (1H, d,  $J$  2.5 Hz, **H3**), 7.39-7.37 (2H, m, **H11/12**), 7.36-7.32 (2H, m, **H11/12**), 7.31-7.28 (1H, m, **H13**), 6.68 (1H, dd,  $J$  8.7, 2.5 Hz, **H1**), 6.69 (1H, d,  $J$  8.6 Hz, **H4**), 5.53 (1H, d,  $J$  10.7 Hz, **H18**), 5.20 (1H, d,  $J$  15.6 Hz, **H9'**), 4.85-4.77 (1H, m, **H16**), 4.66 (1H, d,  $J$  15.6 Hz, **H9**), 3.79 (3H, s, **H14**), 2.90 (1H, dd,  $J$  7.3, 2.8 Hz, **H15**); **Major  $\delta_C$**  (151 MHz,  $CDCl_3$ ):\* 173.4 (**C8**), 156.8 (**C2**), 136.9 (**C5/6**), 134.7 (**C10**), 130.3 (**C19**), 129.6 (**C20/21/22**), 129.5 (**C20/21/22**), 129.1 (**Ar**), 129.0 (**C20/21/22**), 128.2 (**Ar**), 127.7 (**Ar**), 123.2 (**C5/6**), 117.3 (**C1**), 112.1 (**C3**), 111.5 (**C24'**), 111.4 (**C24**), 111.2 (**C4**), 71.0 (**C7**), 60.1 (q,  $J_{C-F}$  32.4 Hz, **C16**), 56.1 (**C14**), 51.8 (**C18**), 51.7 (**C23**), 44.9 (**C9**); **Major  $\delta_F$**  (564 MHz,  $CDCl_3$ ): -7.41 (3F, d,  $J$  6.0 Hz);  **$[\alpha]_D^{20}$**  -8.5 ( $c$  = 1.05,  $CHCl_3$ ); **HRMS** (ESI+): found 503.1695;  $C_{28}H_{21}F_3N_4O_2H$ ,  $[M+H]^+$  requires 503.1690;  **$\nu_{max}$**  (film): 3363.9, 2924.1, 1994.1, 1716.4, 1455.5, 1284.1, 1144.3; **HPLC**: Chiral ART Amylose-SA (with column guard), 15% IPA-hexane 1.0 mL/min,  $\lambda$  = 254 nm,  $t_R$  (major) = 32.2 min,  $t_R$  (minor) = 10.1 min.

\* **C16** not observed due to low signal intensity.

**1-benzyl-2-oxo-4'-phenethyl-5'-(trifluoromethyl)spiro[indoline-3,2'-pyrrolidine]-3',3'-dicarbonitrile (3o)**

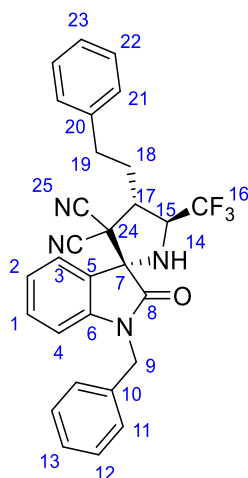

**1a** (50.0 mg, 0.157 mmol, 1 eq.), **2o** (34.5 mg, 0.190 mmol, 1.2 eq.) and **C1** (9 mg, 0.0157 mmol, 0.1 eq.) after 1 day afforded the spirocycle (71 mg, 90 %, 73% ee, >100:1 d.r.) as a yellow foam solid. Crude was purified using 0.5% acetone in toluene.

**Major  $\delta_H$**  (600 MHz,  $CDCl_3$ ): 7.74 (1H, d,  $J$  7.6 Hz, **H3**), 7.38-7.31 (7H, m, **H1 + Ar**), 7.30-7.22 (4H, m, **Ar**), 7.17 (1H, td,  $J$  7.7, 0.8 Hz, **H2**), 6.77 (1H, d,  $J$  7.9 Hz, **H4**), 5.15 (1H, d,  $J$  15.7 Hz, **H9'**), 4.67 (1H, d,  $J$  15.7 Hz, **H9**), 4.35 (1H, td,  $J$  10.2, 3.7 Hz, **H17**), 4.03-3.97 (1H, m, **H15**), 3.05 (1H, td,  $J$  13.5, 5.3 Hz, **H18'**), 2.95-2.89 (1H, m, **H18**), 2.74 (1H, d,  $J$  7.6 Hz, **H14**), 2.44-2.37 (1H, m, **H19'**), 2.32- 2.25 (1H, m, **H19**); **Major  $\delta_C$**  (151 MHz,  $CDCl_3$ ):\* 173.4 (**C8**), 144.0 (**C5/6**), 140.1 (**Ar**), 134.6 (**Ar**), 132.5 (**C1**), 129.1 (**Ar**), 128.9 (**Ar**), 128.4 (**Ar**), 128.2 (**Ar**), 127.7 (**Ar**), 126.7 (**Ar**), 125.0 (**C3**), 123.9 (**C2**), 122.1 (**C5/6**), 112.6 (**C25'**), 111.2 (**C25**), 110.6 (**C4**), 71.2 (**C7**), 63.3 (q,  $J_{C-F}$  32.1 Hz, **C15**), 48.4 (**C24**), 46.8 (**C17**), 44.7 (**C9**), 33.8 (**C18**), 32.2 (**C19**); **Major  $\delta_F$**  (564 MHz,  $CDCl_3$ ): -72.9 (3F, d,  $J$  6.7 Hz);  **$[\alpha]_D^{20}$**  -17.1 ( $c$  = 1.06,  $CHCl_3$ ); **HRMS** (ESI+): found 501.1899;  $C_{29}H_{23}F_3N_4OH$ ,  $[M+H]^+$  requires 501.1897;  **$\nu_{max}$**  (film): 3352.7, 2924.1, 2251.3, 1712.7, 1612.1, 1470.4, 1284.1, 1133.1; **HPLC**: Chiral ART Amylose-SA (with column guard), 20% IPA-hexane 1.0 mL/min,  $\lambda$  = 254 nm,  $t_R$  (major) = 12.6 min,  $t_R$  (minor) = 7.5 min.

\* **C16** not observed due to low signal intensity.

1''-Benzyl-4'-phenyl-5'-(trifluoromethyl)dispiro[indene-2,3'-pyrrolidine-2',3''-indoline]-1,2''(3H)-dione (5a)

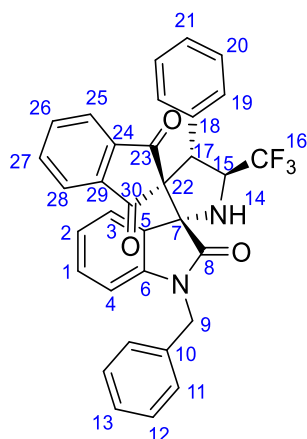

**1a** (100 mg, 0.315 mmol, 1 eq.), **4a** (90.6 mg, 0.387 mmol, 1.2 eq.) and **C1** (18 mg, 0.0319 mmol, 0.1 eq.) after 1 day afforded the spirocycle (133 mg, 77 %, 85% ee, 23.0:1 d.r.) as a sandy-coloured solid. Crude was purified using 1:1 DCM:hexane; → 100 % DCM.

**Major  $\delta_H$**  (600 MHz, CDCl<sub>3</sub>): 7.69-7.64 (1H, m, **Indanone**), 7.62-7.58 (1H, m **Indanone**), 7.56-7.51 (2H, m, **Indanone**), 7.34 (4H, m, **Ar**), 7.27 (3H, m, **Ar**), 7.18 (1H, d, *J* 7.8 Hz, **H3**), 7.18 (2H, d, *J* 7.3, **Ar**), 7.07-7.04 (1H, m, **Ar**), 6.97 (1H, t, *J* 7.8 Hz, **H1**), 6.77 (1H, t, *J* 7.6 Hz, **H2**), 6.44 (1H, d, *J* 7.9 Hz, **H4**), 5.50 (1H, d, *J* 10.6 Hz, **H17**), 5.37-5.30 (1H, m, **H15**), 5.28 (1H, d, *J* 13.2 Hz, **H9'**), 4.42 (1H, d, *J* 15.5 Hz, **H9**), 3.19 (1H, d, *J* 8.7 Hz, **H14**); **Major  $\delta_C$**  (151 MHz, CDCl<sub>3</sub>): 198.7 (**C8**), 195.4 (C=O), 175.5 (C=O), 143.8 (**Ar**), 142.6 (**Ar**), 141.9 (**Ar**), 136.1 (**Ar**), 136.0 (**Ar**), 135.8 (**Ar**), 132.8 (**Ar**), 130.6 (**C1**), 129.1 (**Ar**), 128.8 (**Ar**), 128.6 (**Ar**), 128.1 (**Ar**), 127.9 (**Ar**), 127.8 (**Ar**), 124.9 (**C3**), 123.7 (**Ar**), 123.1 (**Ar**), 123.0 (**Ar**), 122.4 (**C2**), 109.5 (**C4**), 71.2 (**C7**), 71.0 (**C22**), 61.3 (q, *J*<sub>C-F</sub> 31.0 Hz, **C15**), 49.7 (**C17**), 44.5 (**C9**);\* **Major  $\delta_F$**  (564 MHz, CDCl<sub>3</sub>): -78.4 (3F, d, *J* 7.0 Hz);  **$[\alpha]_D^{20}$**  -146.9 (*c* = 1.06, CHCl<sub>3</sub>); **HRMS** (ESI+): found 553.1722; C<sub>33</sub>H<sub>23</sub>F<sub>3</sub>N<sub>2</sub>O<sub>3</sub>H, [M+H]<sup>+</sup> requires 553.1734;  **$\nu_{max}$**  (thin film): 3365.8, 2929.7, 2255.0, 1740.7, 1699.7, 1610.2, 1490.9, 1349.3, 1259.8, 1133.1; **HPLC**: Chiral ART Amylose-SA (with column guard), 35% CHCl<sub>3</sub>-hexane 1.0 mL/min,  $\lambda$  = 254 nm, *t<sub>R</sub>* (major) = 10.7 min, *t<sub>R</sub>* (minor) = 5.4 min.

\* **C16** not observed due to low signal intensity.

1''-Benzyl-4'-phenyl-5'-(trifluoromethyl)dispiro[indene-2,3'-pyrrolidine-2',3''-indoline]-1,2'',3-trione  
(5b)

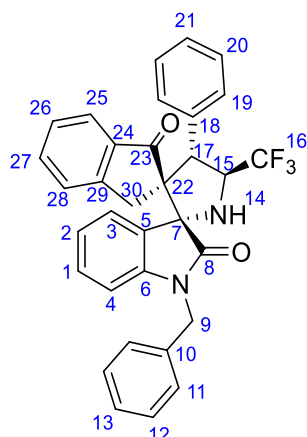

**1a** (100 mg, 0.314 mmol, 1 eq.), **4b** (83mg, 0.337 mmol, 1.2 eq.) and **C1** (18 mg, 0.0314 mmol, 0.1 eq.) after 4 days afforded the spirocycle (90 mg, 53 %, 8.0:1 d.r.) as a pale yellow solid. Crude was purified using 1% acetone in toluene.

**Major  $\delta_H$**  (600 MHz,  $CDCl_3$ ): 7.45 (1H, d,  $J$  7.6 Hz, **H3**), 7.40-7.30 (6H, m, **Ar**), 7.29-7.26 (2H, m, **indanone**), 7.23-7.16 (3H, m, **Ar**), 7.14 (1H, t,  $J$  7.3 Hz, **Ar**) 6.97 (2H, m, **indanone**), 6.90 (1H, t,  $J$  7.7 Hz, **H1**), 6.80 (1H, t,  $J$  7.3 Hz, **H2**), 6.31 (1H, d,  $J$  7.8 Hz, **H4**), 5.44 (1H, d,  $J$  10.9 Hz, **H17**), 5.22 (1H, d,  $J$  15.3 Hz, **H9'**), 4.74 (1H, m, **H15**), 4.27 (1H, d,  $J$  15.5 Hz, **H9**), 3.48 (1H, d,  $J$  16.5 Hz, **H30'**), 3.10 (1H, d,  $J$  16.4 Hz, **H30**), 2.75 (1H, s, **H14**); **Major  $\delta_C$**  (151 MHz,  $CDCl_3$ ): 201.3 (**C23**), 177.5 (**C8**), 151.2 (**Ar**), 143.9 (**C10**), 136.3 (**Ar**), 135.8 (**Ar**), 134.8 (**Ar**), 134.5 (**C10**), 130.0 (**Ar**), 129.5 (**C1**), 128.8 (**Ar**), 128.5 (**Ar**), 127.9 (**Ar**), 127.7 (**Ar**), 127.2 (**Ar**), 126.3 (**Ar**), 125.6 (**Ar**), 125.1 (**Ar**), 124.4 (**C3**), 123.6 (**Ar**), 121.7 (**C2**), 109.1 (**C4**), 73.5 (**C7**), 68.5 (**C22**), 60.6 (q,  $J_{C-F}$  30.7 Hz, **C15**), 47.7 (**C17**), 44.6 (**C9**), 31.4 (**C30**);\* **Major  $\delta_F$**  (564 MHz,  $CDCl_3$ ): -72.4 (3F, d,  $J$  6.5 Hz);  **$[\alpha]_D^{20}$**  -71.4 ( $c$  = 1.01,  $CHCl_3$ ). **HRMS** (ESI+): found 539.1933;  $C_{33}H_{25}F_3N_2O_2H$ ,  $[M+H]^+$  requires 539.1941;  $\nu_{max}$  (thin film): 3339.7, 2922.2, 2251.3, 1718.3, 1606.5, 1349.3, 1278.5, 1136.8.

The enantiomeric composition of this material could not be determined since we were unable to produce a racemic standard of the required diastereoisomer. All attempts to do so (DBU,  $NEt_3$ /Schreiner's catalyst, and an achiral cinchona-thiourea surrogate catalyst derived from 4-(2-aminoethyl)morpholine and 3,5-bis(trifluoromethyl)phenyl isothiocyanate) gave an insufficient quantity of ( $\pm$ )-**5b** to allow identification of enantiomers by HPLC.

---

\* **C16** not observed due to low signal intensity.



Its relative configuration was determined by NOESY analysis (Figure S2), and assuming the relative configuration of the 3 non-indanone stereocentres are identical to **5a**.

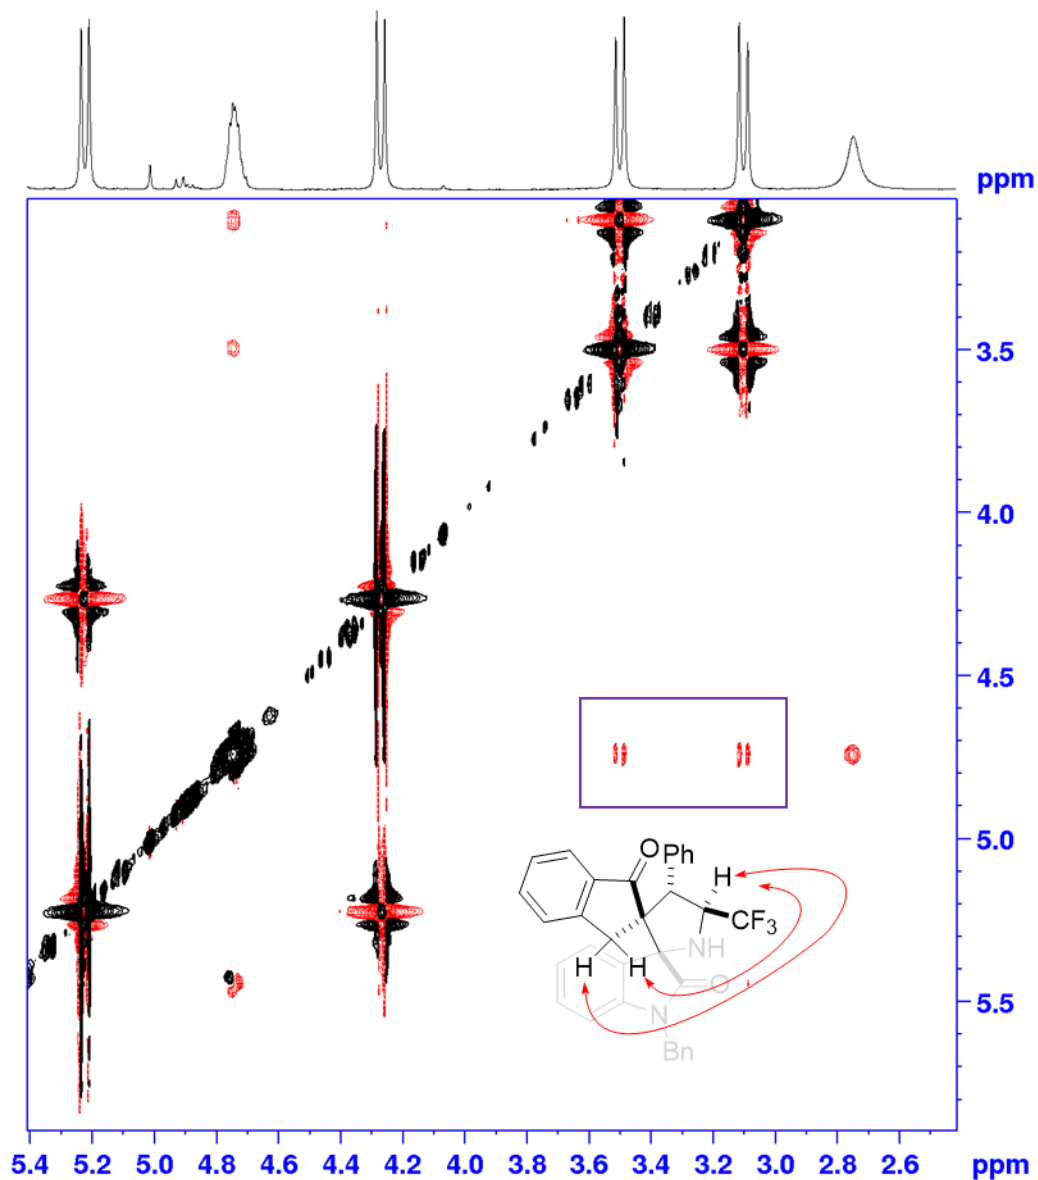

**Figure S2.** NOESY analysis of indanone **5b** (CDCl<sub>3</sub>, 600 MHz,  $t_{mix}$  0.3 s). Key stereochemically consequential nOe signals are indicated.

## 4 HPLC data

*1-Benzyl-2-oxo-4'-phenyl-5'-(trifluoromethyl)spiro[indoline-3,2'-pyrrolidine]-3',3'-dicarbonitrile (3a)*

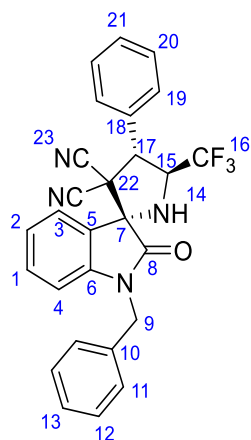

**Conditions:** Chiral ART Amylose-SA (with column guard), 15% IPA-hexane 1.0 mL/min,  $\lambda = 254$  nm,  
 $t_R$  (major) = 19.8 min,  $t_R$  (minor) = 10.5 min.

50 mg scale asymmetric trace: 92% ee

# Single Injection Report

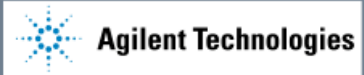

Data file: WR 2.144.dx  
Sequence Name: SingleSample Project Name: WR  
Sample name: WR 2.144 Operator: SYSTEM  
Instrument: 1100HPLC Injection date: 2021-05-03 12:15:33+01:00  
Inj. volume: 25.000 Location: 3  
Acq. method: 15% IPA-HEX 30 mins.amx Type: Sample  
Processing method: 3D UV Quantitative\_DefaultMethod.pmx Sample amount: 0.00  
Manually modified: Manual Integration

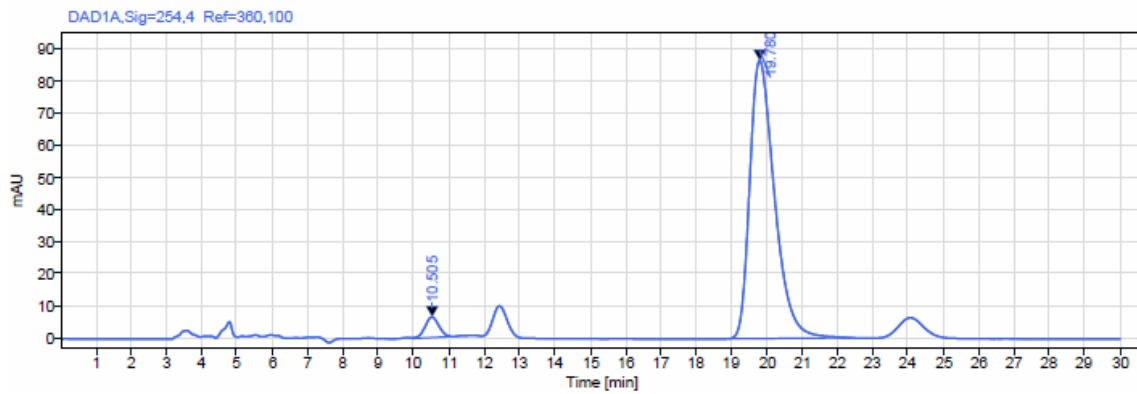

Signal: DAD1A, Sig=254,4 Ref=360,100

| RT [min] | Type | Width [min] | Area    | Height | Area% | Name |
|----------|------|-------------|---------|--------|-------|------|
| 10.505   | VB   | 1.10        | 172.76  | 6.39   | 3.94  |      |
| 19.780   | BB   | 3.44        | 4209.27 | 86.43  | 96.06 |      |
|          |      | Sum         | 4382.03 |        |       |      |

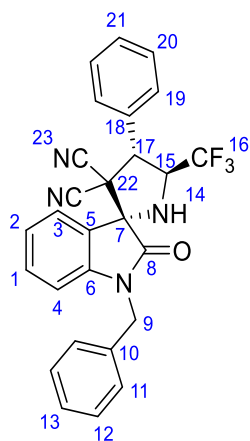

**Conditions:** Chiral art Amylose-SA (with column guard), 15% IPA-hexane 1.0 mL/min,  $\lambda = 254 \text{ nm}$ ,  
 $t_R$  (major) = 18.4 min,  $t_R$  (minor) = 9.9 min.

250 mg scale asymmetric trace: 90% ee

## Single Injection Report

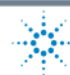

Agilent Technologies

|                           |                                         |                        |                           |
|---------------------------|-----------------------------------------|------------------------|---------------------------|
| <b>Data file:</b>         | WR 2.176 Run 3.dx                       | <b>Project Name:</b>   | WR                        |
| <b>Sequence Name:</b>     | SingleSample                            | <b>Operator:</b>       | SYSTEM                    |
| <b>Sample name:</b>       | WR 2.176 Run 3                          | <b>Injection date:</b> | 2021-07-29 08:52:16+01:00 |
| <b>Instrument:</b>        | 1100HPLC                                | <b>Location:</b>       | 1                         |
| <b>Inj. volume:</b>       | 25.000                                  | <b>Type:</b>           | Sample                    |
| <b>Acq. method:</b>       | 15% IPA-HEX 30 mins.amx                 | <b>Sample amount:</b>  | 0.00                      |
| <b>Processing method:</b> | 3D UV<br>Quantitative_DefaultMethod.pmx |                        |                           |
| <b>Manually modified:</b> | Manual Integration                      |                        |                           |

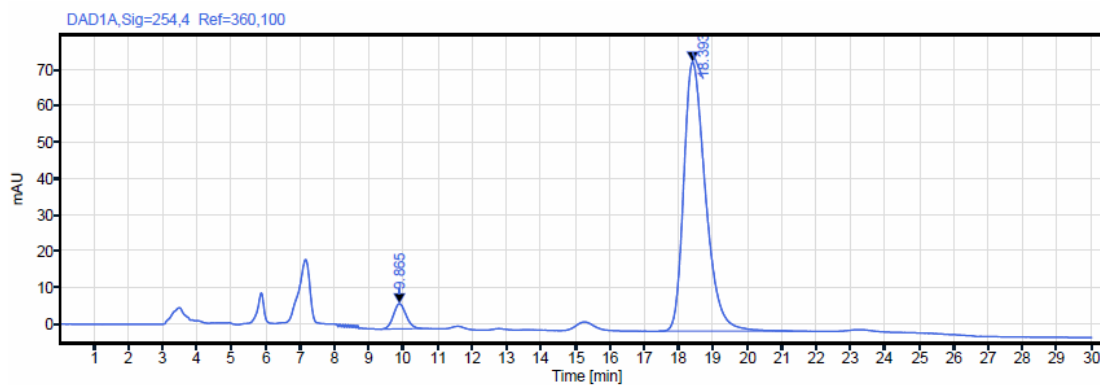

Signal: DAD1A,Sig=254,4 Ref=360,100

| RT [min] | Type | Width [min] | Area    | Height | Area% | Name |
|----------|------|-------------|---------|--------|-------|------|
| 9.865    | MM m | 0.38        | 176.80  | 6.91   | 5.15  |      |
| 18.393   | BM m | 0.66        | 3253.69 | 74.06  | 94.85 |      |
|          | Sum  |             | 3430.49 |        |       |      |

## Single Injection Report

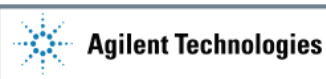

|                           |                                         |                        |                           |
|---------------------------|-----------------------------------------|------------------------|---------------------------|
| <b>Data file:</b>         | WR 2.139 Vial 1.dx                      | <b>Project Name:</b>   | WR                        |
| <b>Sequence Name:</b>     | SingleSample                            | <b>Operator:</b>       | SYSTEM                    |
| <b>Sample name:</b>       | WR 2.139 Vial 1                         | <b>Injection date:</b> | 2021-03-25 16:20:05+00:00 |
| <b>Instrument:</b>        | 1100HPLC                                | <b>Location:</b>       | 1                         |
| <b>Inj. volume:</b>       | 25.000                                  | <b>Type:</b>           | Sample                    |
| <b>Acq. method:</b>       | 15% IPA-HEX 30 mins.amx                 | <b>Sample amount:</b>  | 0.00                      |
| <b>Processing method:</b> | 3D UV<br>Quantitative_DefaultMethod.pmx |                        |                           |
| <b>Manually modified:</b> | Manual Integration                      |                        |                           |

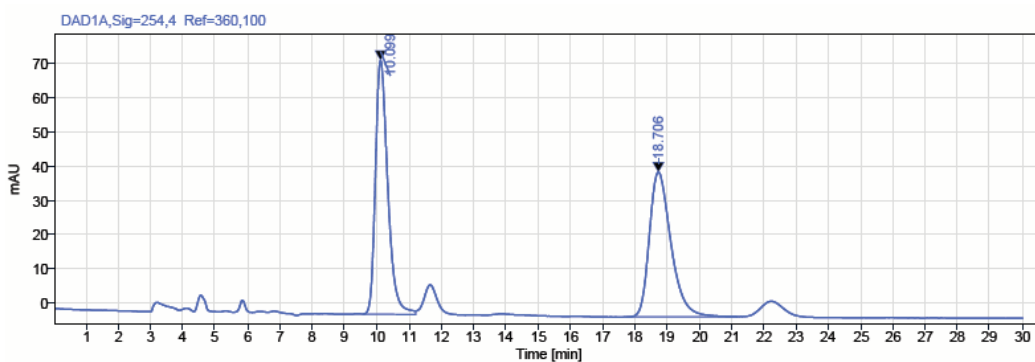

Signal: DAD1A,Sig=254,4 Ref=360,100

| RT [min] | Type | Width [min] | Area    | Height | Area% | Name |
|----------|------|-------------|---------|--------|-------|------|
| 10.099   | BV   | 1.65        | 1972.49 | 74.25  | 50.00 |      |
| 18.706   | BB   | 3.46        | 1972.24 | 42.35  | 50.00 |      |
|          | Sum  |             | 3944.73 |        |       |      |

1-Benzyl-4'-(4-methoxyphenyl)-2-oxo-5'-(trifluoromethyl)spiro[indoline-3,2'-pyrrolidine]-3',3'-dicarbonitrile (3b)

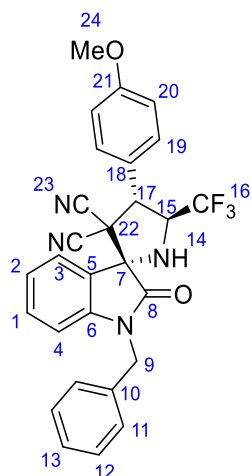

**Conditions:** Chiral art Amylose-SA (with column guard), 15% IPA-hexane 1.0 mL/min,  $\lambda = 254$  nm,  $t_R$  (major) = 19.3 min,  $t_R$  (minor) = 13.7 min.

Asymmetric trace: 93% ee

Single Injection Report 

Data file: WR 2.174 Run 2.dx  
 Sequence Name: SingleSample  
 Sample name: WR 2.174 Run 2  
 Instrument: 1100HPLC  
 Inj. volume: 25.000  
 Acq. method: 15% IPA-HEX 30 mins.amx  
 Processing method: 3D UV Quantitative\_DefaultMethod.pmx  
 Manually modified: Manual Integration  
 Project Name: WR  
 Operator: SYSTEM  
 Injection date: 2021-06-18 15:19:35+01:00  
 Location: 43  
 Type: Sample  
 Sample amount: 0.00

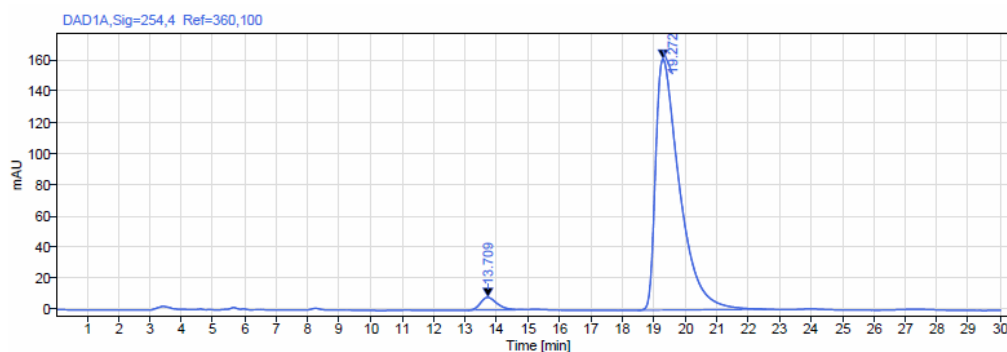

Signal: DAD1A,Sig=254,4 Ref=360,100

| RT [min] | Type | Width [min] | Area    | Height | Area% | Name |
|----------|------|-------------|---------|--------|-------|------|
| 13.709   | BB   | 1.75        | 295.57  | 8.11   | 3.35  |      |
| 19.272   | BB   | 4.08        | 8516.62 | 161.50 | 96.65 |      |
|          | Sum  |             | 8812.19 |        |       |      |

Racemic trace

## Single Injection Report

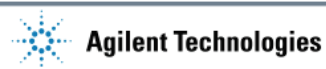

**Data file:** WR 2.139 Vial2 (CAD-1-39 rac) re-run.dx  
**Sequence Name:** SingleSample **Project Name:** WR  
**Sample name:** WR 2.139 Vial2 (CAD-1-39 rac) re-run **Operator:** SYSTEM  
**Instrument:** 1100HPLC **Injection date:** 2021-03-30 13:18:00+01:00  
**Inj. volume:** 25.000 **Location:** 5  
**Acq. method:** 15% IPA-HEX 30 mins.amx **Type:** Sample  
**Processing method:** 3D UV Quantitative\_DefaultMethod.pmx **Sample amount:** 0.00  
**Manually modified:** Manual Integration

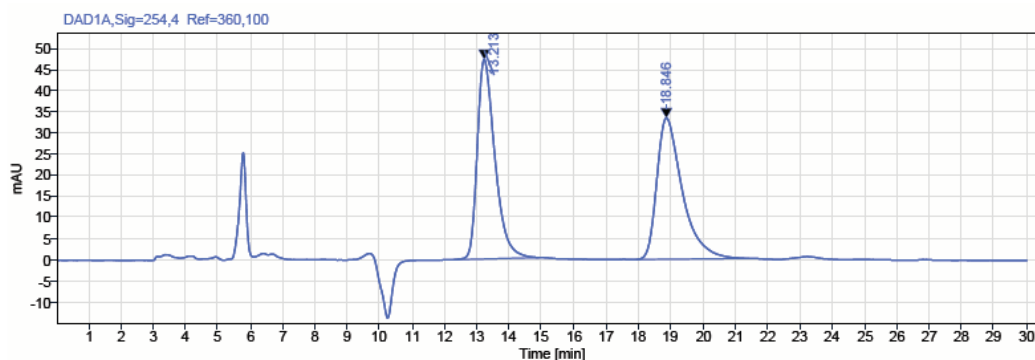

Signal: DAD1A,Sig=254,4 Ref=360,100

| RT [min] | Type | Width [min] | Area    | Height | Area% | Name |
|----------|------|-------------|---------|--------|-------|------|
| 13.213   | BB   | 2.68        | 1794.29 | 47.27  | 49.54 |      |
| 18.846   | BB   | 3.49        | 1827.90 | 33.43  | 50.46 |      |
|          |      | Sum         | 3622.19 |        |       |      |

1-Benzyl-4'-(4-nitrophenyl)-2-oxo-5'-(trifluoromethyl)spiro[indoline-3,2'-pyrrolidine]-3',3'-dicarbonitrile (3c)

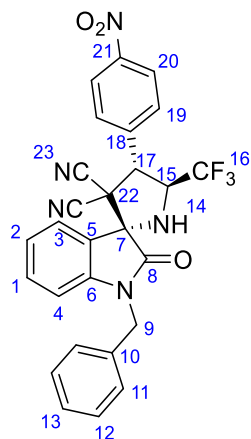

**Conditions:** Chiral art Amylose-SB (with column guard), 20% IPA-hexane 1.0 mL/min,  $\lambda = 254$  nm,  $t_R$  (major) = 15.0 min,  $t_R$  (minor) = 12.8 min.

Asymmetric trace: 97% ee



# Single Injection Report

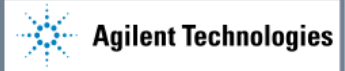

**Data file:** WR 2.167 (20% IPA-Hex, SB).dx  
**Sequence Name:** SingleSample **Project Name:** WR  
**Sample name:** WR 2.167 (20% IPA-Hex, SB) **Operator:** SYSTEM  
**Instrument:** 1100HPLC **Injection date:** 2021-06-03 14:30:28+01:00  
**Inj. volume:** 25.000 **Location:** 22  
**Acq. method:** 20% IPA-HEX 30 mins.amx **Type:** Sample  
**Processing method:** 3D UV Quantitative\_DefaultMethod.pmx **Sample amount:** 0.00  
**Manually modified:** Manual Integration

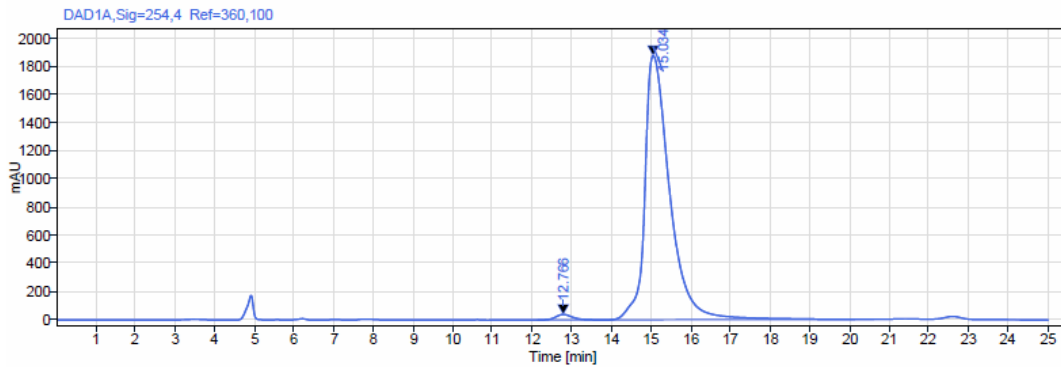

Signal: DAD1A, Sig=254,4 Ref=360,100

| RT [min] | Type | Width [min] | Area     | Height  | Area% | Name |
|----------|------|-------------|----------|---------|-------|------|
| 12.766   | VB   | 1.69        | 1157.03  | 39.28   | 1.38  |      |
| 15.034   | BB   | 6.77        | 82564.95 | 1879.89 | 98.62 |      |
|          | Sum  |             | 83721.98 |         |       |      |

Racemic trace

## Single Injection Report Agilent Technologies

|                           |                                              |                        |                           |
|---------------------------|----------------------------------------------|------------------------|---------------------------|
| <b>Data file:</b>         | PCK 3.74 TLC 20% SB repeat20210312 152812.dx |                        |                           |
| <b>Sequence Name:</b>     | SingleSample                                 | <b>Project Name:</b>   | JS                        |
| <b>Sample name:</b>       | PCK 3.74 TLC 20% SB repeat                   | <b>Operator:</b>       | SYSTEM                    |
| <b>Instrument:</b>        | 1100HPLC                                     | <b>Injection date:</b> | 2021-03-12 15:31:56+00:00 |
| <b>Inj. volume:</b>       | 25.000                                       | <b>Location:</b>       | 24                        |
| <b>Acq. method:</b>       | 20% IPA-hexane 60 mins 35C.amx               | <b>Type:</b>           | Sample                    |
| <b>Processing method:</b> | 3D UV<br>Quantitative_DefaultMethod.pmx      | <b>Sample amount:</b>  | 0.00                      |
| <b>Manually modified:</b> | Manual Integration                           |                        |                           |

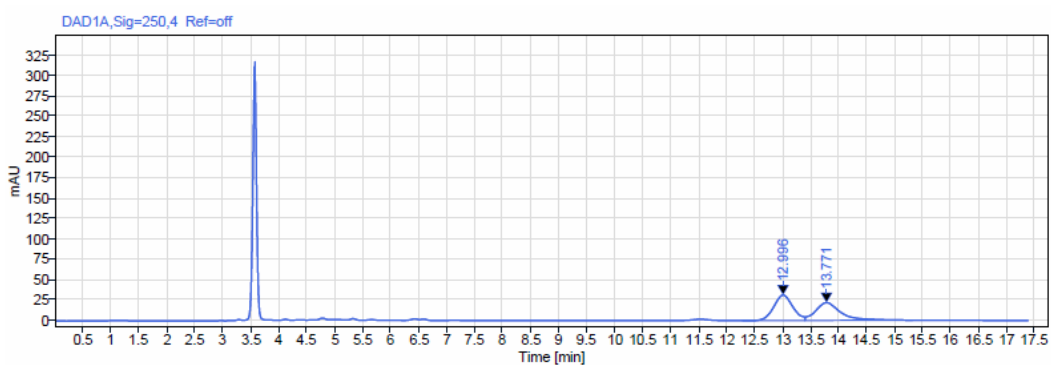

Signal: DAD1A,Sig=250,4 Ref=off

| RT [min] | Type | Width [min] | Area    | Height | Area% | Name |
|----------|------|-------------|---------|--------|-------|------|
| 12.996   | BV   | 1.12        | 737.90  | 31.27  | 51.93 |      |
| 13.771   | VB   | 1.92        | 683.00  | 21.73  | 48.07 |      |
|          | Sum  |             | 1420.90 |        |       |      |

1-Benzyl-4'-(naphthalen-2-yl)-2-oxo-5'-(trifluoromethyl)spiro[indoline-3,2'-pyrrolidine]-3',3'-dicarbonitrile (3d)

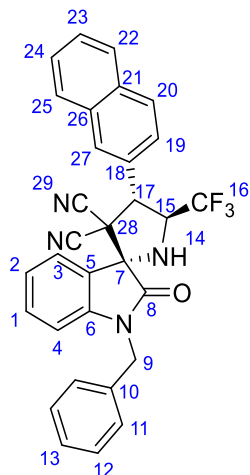

**Conditions:** Chiral art Amylose-SB (with column guard), 20% IPA-hexane 1.0 mL/min,  $\lambda = 254$  nm,  $t_R$  (major) = 11.8 min,  $t_R$  (minor) = 9.4 min.

Asymmetric trace: 87% ee

Single Injection Report 

**Data file:** WR 2.164 (20% IPA-Hex, SB).dx  
**Sequence Name:** SingleSample **Project Name:** WR  
**Sample name:** WR 2.164 (20% IPA-Hex, SB) **Operator:** SYSTEM  
**Instrument:** 1100HPLC **Injection date:** 2021-06-03 14:56:46+01:00  
**Inj. volume:** 25.000 **Location:** 13  
**Acq. method:** 20% IPA-HEX 30 mins.amx **Type:** Sample  
**Processing method:** 3D UV Quantitative\_DefaultMethod.pmx **Sample amount:** 0.00  
**Manually modified:** Manual Integration

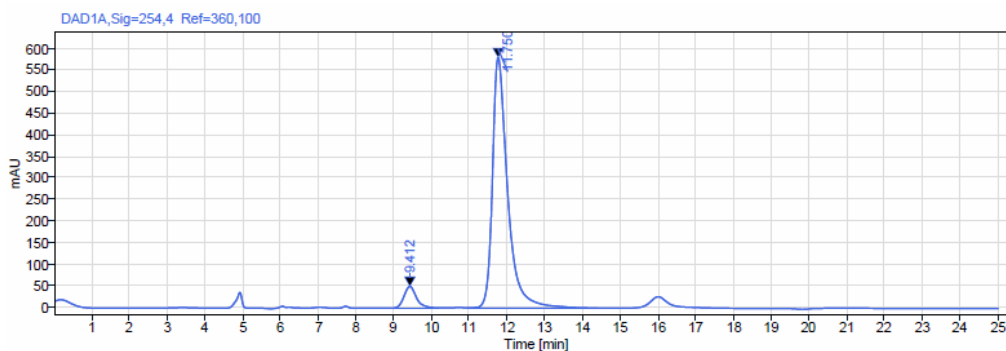

Signal: DAD1A,Sig=254,4 Ref=360,100

| RT [min] | Type | Width [min] | Area     | Height | Area% | Name |
|----------|------|-------------|----------|--------|-------|------|
| 9.412    | BV   | 1.32        | 1157.58  | 50.28  | 6.66  |      |
| 11.750   | VB   | 3.45        | 16225.88 | 579.92 | 93.34 |      |
|          | Sum  |             | 17383.46 |        |       |      |

Racemic trace

**Single Injection Report** 

**Data file:** WR 2.164 RAC (20% IPA-Hex, SB).dx  
**Sequence Name:** SingleSample **Project Name:** WR  
**Sample name:** WR 2.164 RAC (20% IPA-Hex, SB) **Operator:** SYSTEM  
**Instrument:** 1100HPLC **Injection date:** 2021-06-03 15:23:09+01:00  
**Inj. volume:** 25.000 **Location:** 10  
**Acq. method:** 20% IPA-HEX 30 mins.amx **Type:** Sample  
**Processing method:** 3D UV Quantitative\_DefaultMethod.pmx **Sample amount:** 0.00  
**Manually modified:** Manual Integration

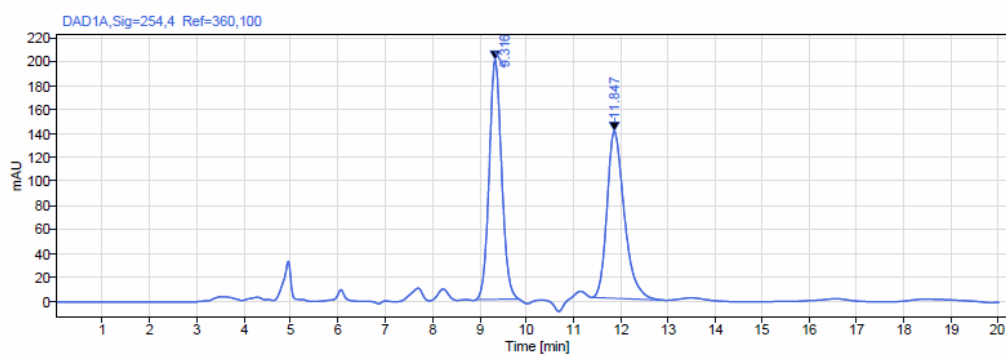

Signal: DAD1A, Sig=254,4 Ref=360,100

| RT [min] | Type | Width [min] | Area    | Height | Area% | Name |
|----------|------|-------------|---------|--------|-------|------|
| 9.316    | MM m | 0.28        | 3658.89 | 199.58 | 50.75 |      |
| 11.847   | MM m | 0.39        | 3551.20 | 139.15 | 49.25 |      |
|          |      | Sum         | 7210.10 |        |       |      |

1-benzyl-2-oxo-4'-(*o*-tolyl)-5'-(trifluoromethyl)spiro[indoline-3,2'-pyrrolidine]-3',3'-dicarbonitrile (3e)

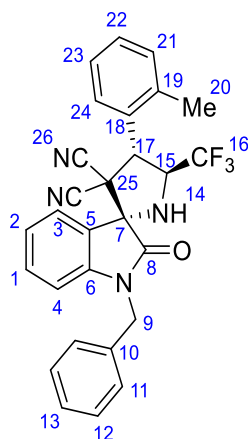

**Conditions:** Chiral art Amylose-SA (with column guard), 20% IPA-hexane 1.0 mL/min,  $\lambda = 254$  nm,  $t_R$  (major) = 11.3 min,  $t_R$  (minor) = 6.6 min.

Asymmetric trace: 83% ee

Single Injection Report  Agilent Technologies

**Data file:** WR 2.160 (20% IPA, 10 uL, SA).dx  
**Sequence Name:** SingleSample **Project Name:** WR  
**Sample name:** WR 2.160 (20% IPA, 10 uL, SA) **Operator:** SYSTEM  
**Instrument:** 1100HPLC **Injection date:** 2021-05-06 12:04:52+01:00  
**Inj. volume:** 10.000 **Location:** 1  
**Acq. method:** 20% IPA-HEX 30 mins 10 micro L.amx **Type:** Sample  
**Processing method:** 3D UV Quantitative\_DefaultMethod.pmx **Sample amount:** 0.00  
**Manually modified:** Manual Integration

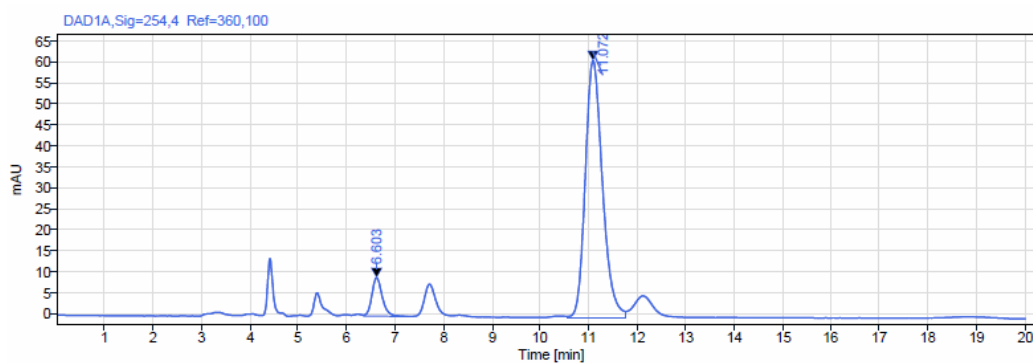

Signal: DAD1A,Sig=254,4 Ref=360,100

| RT [min] | Type | Width [min] | Area    | Height | Area% | Name |
|----------|------|-------------|---------|--------|-------|------|
| 6.603    | VB   | 0.91        | 136.69  | 9.15   | 8.33  |      |
| 11.072   | VV   | 1.21        | 1505.06 | 61.17  | 91.67 |      |
|          |      | Sum         | 1641.75 |        |       |      |

Racemic traces

**Single Injection Report** 

|                           |                                         |                        |                           |
|---------------------------|-----------------------------------------|------------------------|---------------------------|
| <b>Data file:</b>         | WR 2.160 RAC (Run 1).dx                 | <b>Project Name:</b>   | WR                        |
| <b>Sequence Name:</b>     | SingleSample                            | <b>Operator:</b>       | SYSTEM                    |
| <b>Sample name:</b>       | WR 2.160 RAC (Run 1)                    | <b>Injection date:</b> | 2021-05-07 15:25:04+01:00 |
| <b>Instrument:</b>        | 1100HPLC                                | <b>Location:</b>       | 1                         |
| <b>Inj. volume:</b>       | 25.000                                  | <b>Type:</b>           | Sample                    |
| <b>Acq. method:</b>       | 20% IPA-HEX 30 mins.amx                 | <b>Sample amount:</b>  | 0.00                      |
| <b>Processing method:</b> | 3D UV<br>Quantitative_DefaultMethod.pmx |                        |                           |
| <b>Manually modified:</b> | Manual Integration                      |                        |                           |

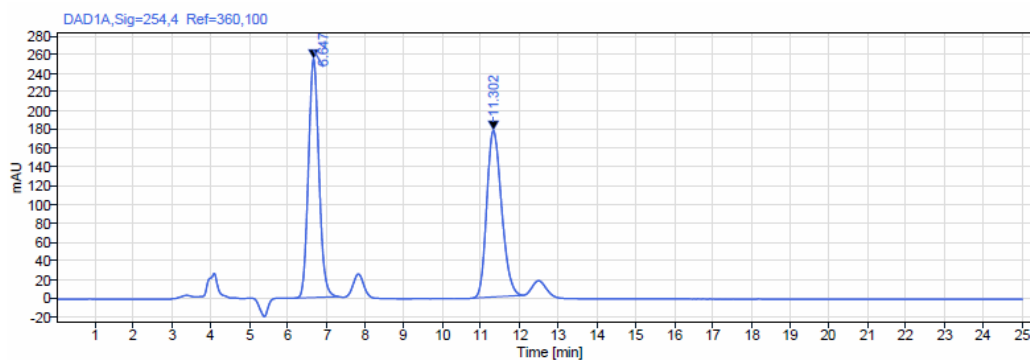

Signal: DAD1A, Sig=254,4 Ref=360,100

| RT [min] | Type | Width [min] | Area    | Height | Area% | Name |
|----------|------|-------------|---------|--------|-------|------|
| 6.647    | MM m | 0.29        | 4813.79 | 254.30 | 50.42 |      |
| 11.302   | MM m | 0.42        | 4733.64 | 177.40 | 49.58 |      |
|          |      | Sum         | 9547.43 |        |       |      |

1-Benzyl-4'-(2-bromophenyl)-2-oxo-5'-(trifluoromethyl)spiro[indoline-3,2'-pyrrolidine]-3',3'-dicarbonitrile (3f)

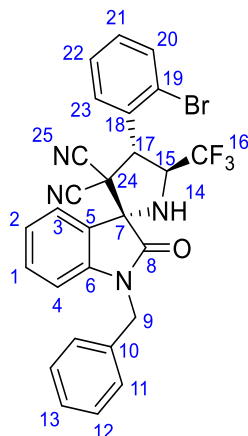

**Conditions:** Chiral art Amylose-SA (with column guard), 20% IPA-hexane 1.0 mL/min,  $\lambda = 254 \text{ nm}$ ,  
 $t_R$  (major) = 13.7 min,  $t_R$  (minor) = 9.9 min.

Asymmetric trace: 80% ee

### Single Injection Report

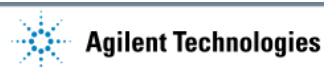

|                           |                                         |                        |                           |
|---------------------------|-----------------------------------------|------------------------|---------------------------|
| <b>Data file:</b>         | WR 2.158 (20% IPA-Hex, 25 uL).dx        | <b>Project Name:</b>   | WR                        |
| <b>Sequence Name:</b>     | SingleSample                            | <b>Operator:</b>       | SYSTEM                    |
| <b>Sample name:</b>       | WR 2.158 (20% IPA-Hex, 25 uL)           | <b>Injection date:</b> | 2021-06-02 10:53:00+01:00 |
| <b>Instrument:</b>        | 1100HPLC                                | <b>Location:</b>       | 11                        |
| <b>Inj. volume:</b>       | 25.000                                  | <b>Type:</b>           | Sample                    |
| <b>Acq. method:</b>       | 20% IPA-HEX 30 mins.amx                 | <b>Sample amount:</b>  | 0.00                      |
| <b>Processing method:</b> | 3D UV<br>Quantitative_DefaultMethod.pmx |                        |                           |
| <b>Manually modified:</b> | Manual Integration                      |                        |                           |

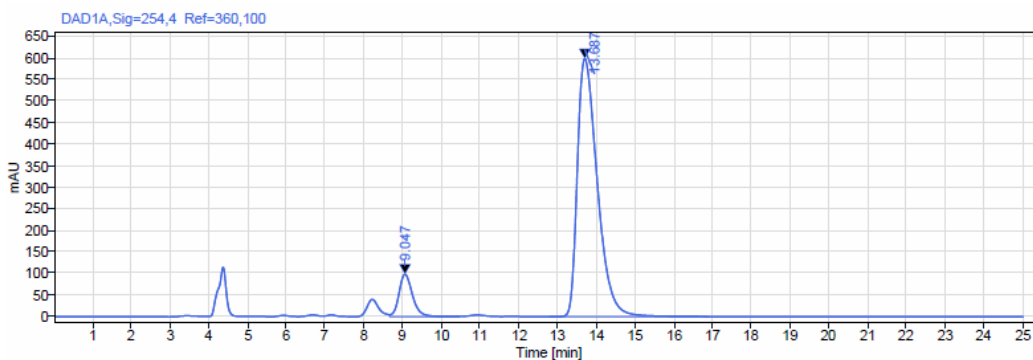

Signal: DAD1A,Sig=254,4 Ref=360,100

| RT [min] | Type | Width [min] | Area     | Height | Area% | Name |
|----------|------|-------------|----------|--------|-------|------|
| 9.047    | VV   | 1.78        | 2405.32  | 98.85  | 10.07 |      |
| 13.687   | BB   | 4.09        | 21479.40 | 600.08 | 89.93 |      |
|          | Sum  |             | 23884.73 |        |       |      |

Racemic trace

# Single Injection Report

**Data file:** WR 2.139 Vial 5 20% IPA.dx  
**Sequence Name:** SingleSample  
**Sample name:** WR 2.139 Vial 5 20% IPA  
**Instrument:** 1100HPLC  
**Inj. volume:** 25.000  
**Acq. method:** 20% IPA-HEX 60 mins.amx  
**Processing method:** 3D UV  
Quantitative\_DefaultMethod.pmx  
**Manually modified:** Manual Integration

**Project Name:** WR  
**Operator:** SYSTEM  
**Injection date:** 2021-03-25 18:44:47+00:00  
**Location:** 5  
**Type:** Sample  
**Sample amount:** 0.00

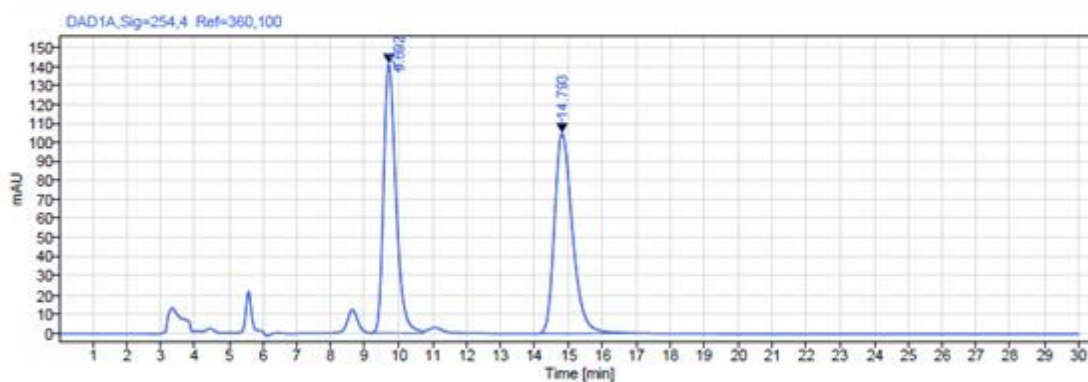

Signal: DAD1A, Sig=254,4 Ref=360,100

| RT [min] | Type | Width [min] | Area    | Height | Area% | Name |
|----------|------|-------------|---------|--------|-------|------|
| 9.692    | BV   | 1.57        | 3561.01 | 141.36 | 48.00 |      |
| 14.793   | BB   | 2.93        | 3857.83 | 105.14 | 52.00 |      |
|          |      | Sum         | 7418.85 |        |       |      |



1-Benzyl-4'-(4-chlorophenyl)-2-oxo-5'-(trifluoromethyl)spiro[indoline-3,2'-pyrrolidine]-3',3'-dicarbonitrile (3g)

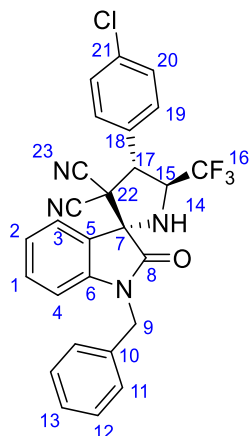

**Conditions:** Chiral art Amylose-SA (with column guard), 15% IPA-hexane 1.0 mL/min,  $\lambda = 254$  nm,  $t_R$  (major) = 18.7 min,  $t_R$  (minor) = 16.7 min.

Asymmetric trace: 93% ee

Single Injection Report 

|                           |                                         |                        |                           |
|---------------------------|-----------------------------------------|------------------------|---------------------------|
| <b>Data file:</b>         | WR 2.145.dx                             | <b>Project Name:</b>   | WR                        |
| <b>Sequence Name:</b>     | SingleSample                            | <b>Operator:</b>       | SYSTEM                    |
| <b>Sample name:</b>       | WR 2.145                                | <b>Injection date:</b> | 2021-05-03 12:46:53+01:00 |
| <b>Instrument:</b>        | 1100HPLC                                | <b>Location:</b>       | 4                         |
| <b>Inj. volume:</b>       | 25.000                                  | <b>Type:</b>           | Sample                    |
| <b>Acq. method:</b>       | 15% IPA-HEX 30 mins.amx                 | <b>Sample amount:</b>  | 0.00                      |
| <b>Processing method:</b> | 3D UV<br>Quantitative_DefaultMethod.pmx |                        |                           |
| <b>Manually modified:</b> | Manual Integration                      |                        |                           |

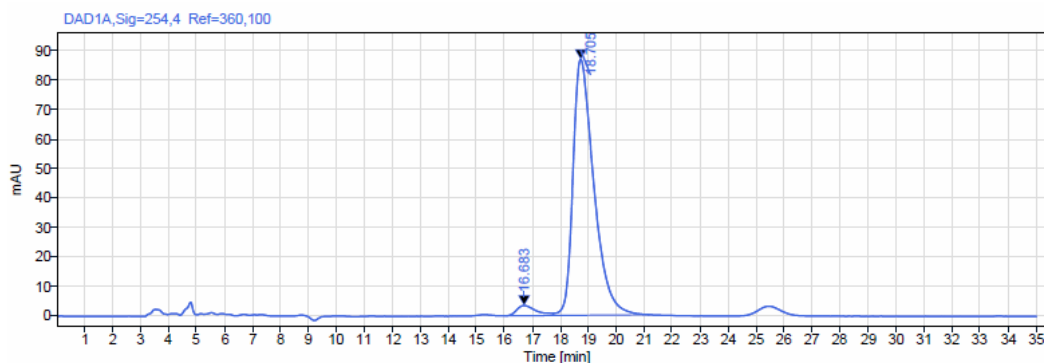

| RT [min] | Type | Width [min] | Area    | Height | Area% | Name |
|----------|------|-------------|---------|--------|-------|------|
| 16.683   | BV   | 1.74        | 168.04  | 3.48   | 3.60  |      |
| 18.705   | VB   | 3.42        | 4500.38 | 86.85  | 96.40 |      |
|          | Sum  |             | 4668.42 |        |       |      |

Racemic trace

## Single Injection Report

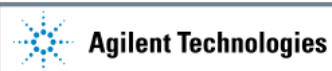

|                           |                                         |                        |                           |
|---------------------------|-----------------------------------------|------------------------|---------------------------|
| <b>Data file:</b>         | WR 2.139 Vial 3.dx                      | <b>Project Name:</b>   | WR                        |
| <b>Sequence Name:</b>     | SingleSample                            | <b>Operator:</b>       | SYSTEM                    |
| <b>Sample name:</b>       | WR 2.139 Vial 3                         | <b>Injection date:</b> | 2021-03-25 17:32:50+00:00 |
| <b>Instrument:</b>        | 1100HPLC                                | <b>Location:</b>       | 3                         |
| <b>Inj. volume:</b>       | 25.000                                  | <b>Type:</b>           | Sample                    |
| <b>Acq. method:</b>       | 15% IPA-HEX 30 mins.amx                 | <b>Sample amount:</b>  | 0.00                      |
| <b>Processing method:</b> | 3D UV<br>Quantitative_DefaultMethod.pmx |                        |                           |
| <b>Manually modified:</b> | Manual Integration                      |                        |                           |

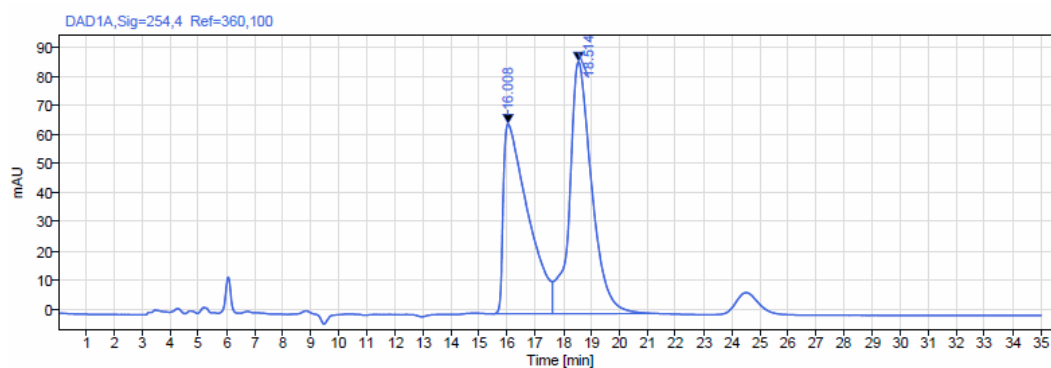

Signal: DAD1A, Sig=254,4 Ref=360,100

| RT [min] | Type | Width [min] | Area    | Height | Area% | Name |
|----------|------|-------------|---------|--------|-------|------|
| 16.008   | BV   | 2.15        | 3966.36 | 65.13  | 45.32 |      |
| 18.514   | VB   | 3.64        | 4784.74 | 86.46  | 54.68 |      |
|          |      | Sum         | 8751.10 |        |       |      |

1-Benzyl-2-oxo-5'-(trifluoromethyl)-4'-(3,4,5-trimethoxyphenyl)spiro[indoline-3,2'-pyrrolidine]-3',3'-dicarbonitrile (3h)

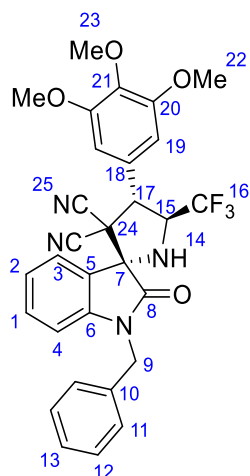

**Conditions:** Chiral art Amylose-SA (with column guard), 15% IPA-hexane 1.0 mL/min,  $\lambda = 254$  nm,  $t_R$  (major) = 20.7 min,  $t_R$  (minor) = 9.9 min.

Asymmetric trace: 92% ee

Single Injection Report 

|                           |                                         |                        |                           |
|---------------------------|-----------------------------------------|------------------------|---------------------------|
| <b>Data file:</b>         | WR 2.143.dx                             | <b>Project Name:</b>   | WR                        |
| <b>Sequence Name:</b>     | SingleSample                            | <b>Operator:</b>       | SYSTEM                    |
| <b>Sample name:</b>       | WR 2.143                                | <b>Injection date:</b> | 2021-05-03 11:39:14+01:00 |
| <b>Instrument:</b>        | 1100HPLC                                | <b>Location:</b>       | 2                         |
| <b>Inj. volume:</b>       | 25.000                                  | <b>Type:</b>           | Sample                    |
| <b>Acq. method:</b>       | 15% IPA-HEX 30 mins.amx                 | <b>Sample amount:</b>  | 0.00                      |
| <b>Processing method:</b> | 3D UV<br>Quantitative_DefaultMethod.pmx |                        |                           |
| <b>Manually modified:</b> | Manual Integration                      |                        |                           |

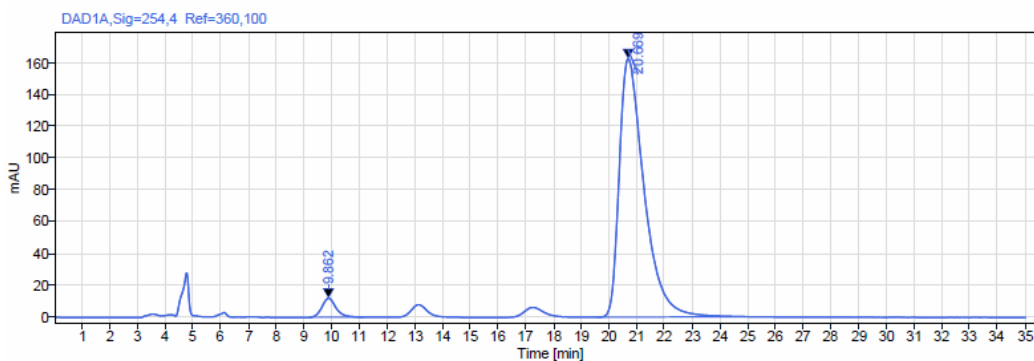

| Signal: DAD1A, Sig=254,4 Ref=360,100 |      |             |          |        |       |      |
|--------------------------------------|------|-------------|----------|--------|-------|------|
| RT [min]                             | Type | Width [min] | Area     | Height | Area% | Name |
| 9.862                                | BV   | 1.96        | 423.19   | 12.02  | 4.02  |      |
| 20.669                               | BB   | 5.37        | 10111.75 | 162.65 | 95.98 |      |
|                                      | Sum  |             | 10534.94 |        |       |      |

Racemic trace

**Single Injection Report** 

**Data file:** CAD-1-46 RAC (15% IPA, 10 uL, SA).dx  
**Sequence Name:** SingleSample **Project Name:** WR  
**Sample name:** CAD-1-46 RAC (15% IPA, 10 uL, SA) **Operator:** SYSTEM  
**Instrument:** 1100HPLC **Injection date:** 2021-05-06 11:07:52+01:00  
**Inj. volume:** 10.000 **Location:** 3  
**Acq. method:** 15% IPA-HEX 30 mins 10 micro L.amx **Type:** Sample  
**Processing method:** 3D UV Quantitative\_DefaultMethod.pmx **Sample amount:** 0.00  
**Manually modified:** Manual Integration

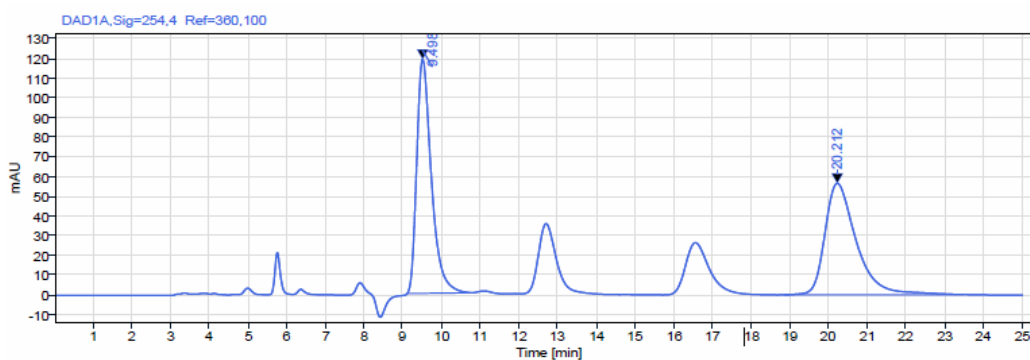

Signal: DAD1A, Sig=254,4 Ref=360,100

| RT [min] | Type | Width [min] | Area    | Height | Area% | Name |
|----------|------|-------------|---------|--------|-------|------|
| 9.498    | MM m | 0.40        | 3118.86 | 118.84 | 49.50 |      |
| 20.212   | BB   | 4.65        | 3181.88 | 56.57  | 50.50 |      |
|          | Sum  |             | 6300.74 |        |       |      |

1-benzyl-4'-(furan-2-yl)-2-oxo-5'-(trifluoromethyl)spiro[indoline-3,2'-pyrrolidine]-3',3'-dicarbonitrile (3i)

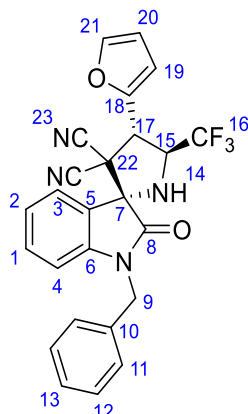

**Conditions:** Chiral art Amylose-SA (with column guard), 15% IPA-hexane 1.0 mL/min,  $\lambda = 254 \text{ nm}$ ,  $t_R$  (major) = 19.2 min,  $t_R$  (minor) = 9.2 min.

Asymmetric trace: 91% ee

Single Injection Report 

**Data file:** WR 2.161 (15% IPA-Hex, SA) Run 3 V2.dx  
**Sequence Name:** SingleSample **Project Name:** WR  
**Sample name:** WR 2.161 (15% IPA-Hex, SA) Run 3 V2 **Operator:** SYSTEM  
**Instrument:** 1100HPLC **Injection date:** 2021-06-11 11:15:07+01:00  
**Inj. volume:** 25.000 **Location:** 3  
**Acq. method:** 15% IPA-HEX 30 mins.amx **Type:** Sample  
**Processing method:** 3D UV Quantitative\_DefaultMethod.pmx **Sample amount:** 0.00  
**Manually modified:** None

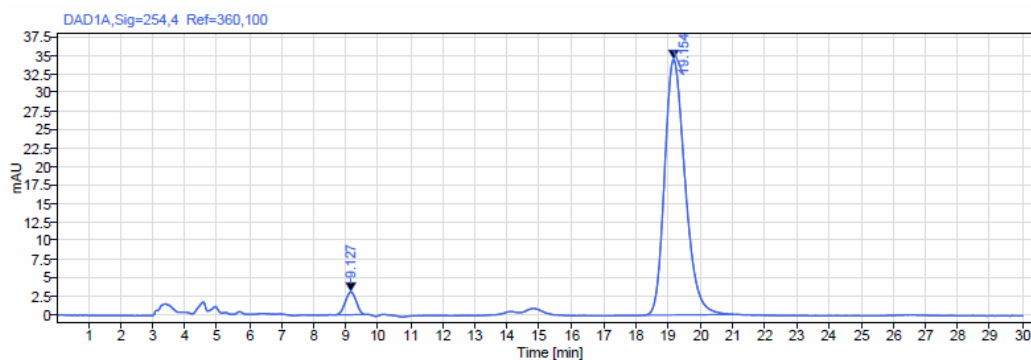

Signal: DAD1A, Sig=254,4 Ref=360,100

| RT [min] | Type | Width [min] | Area    | Height | Area% | Name |
|----------|------|-------------|---------|--------|-------|------|
| 9.127    | BB   | 0.93        | 72.56   | 3.07   | 4.54  |      |
| 19.154   | BB   | 2.80        | 1527.09 | 34.57  | 95.46 |      |
|          | Sum  |             | 1599.65 |        |       |      |

Racemic trace

**Single Injection Report** 

**Data file:** WR 2.161 Rac (22-06) Run 3.dx  
**Sequence Name:** SingleSample **Project Name:** WR  
**Sample name:** WR 2.161 Rac (22-06) Run 3 **Operator:** SYSTEM  
**Instrument:** 1100HPLC **Injection date:** 2021-06-22 12:29:08+01:00  
**Inj. volume:** 25.000 **Location:** 41  
**Acq. method:** 15% IPA-HEX 30 mins.amx **Type:** Sample  
**Processing method:** 3D UV Quantitative\_DefaultMethod.pmx **Sample amount:** 0.00  
**Manually modified:** Manual Integration

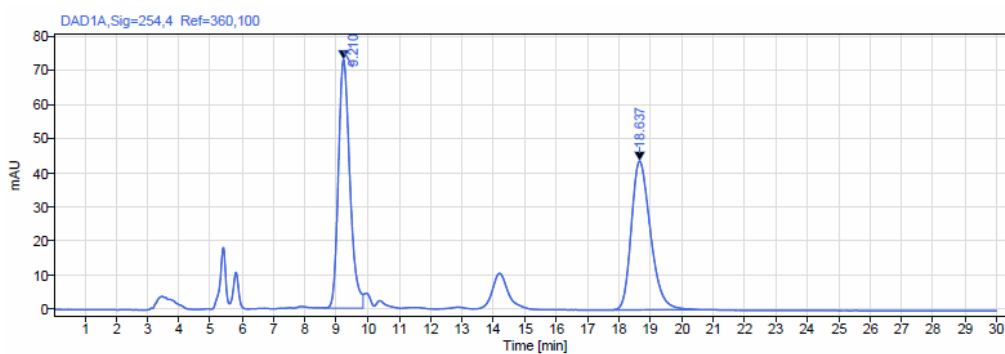

Signal: DAD1A,Sig=254,4 Ref=360,100

| RT [min] | Type | Width [min] | Area    | Height | Area% | Name |
|----------|------|-------------|---------|--------|-------|------|
| 9.210    | BV   | 1.26        | 1852.09 | 72.88  | 50.03 |      |
| 18.637   | BB   | 2.80        | 1849.70 | 43.65  | 49.97 |      |
|          | Sum  |             | 3701.79 |        |       |      |

(E)-1-benzyl-2-oxo-4'-styryl-5'-(trifluoromethyl)spiro[indoline-3,2'-pyrrolidine]-3',3'-dicarbonitrile (3j)



**Conditions:** Chiral art Amylose-SA (with column guard), 15% IPA-hexane 1.0 mL/min,  $\lambda = 254$  nm,  $t_R$  (major) = 15.3 min,  $t_R$  (minor) = 8.8 min.

Asymmetric trace: 94% ee

## Single Injection Report

**Data file:** WR 2.162 (15% IPA-Hex, SA) V3.dx  
**Sequence Name:** SingleSample **Project Name:** WR  
**Sample name:** WR 2.162 (15% IPA-Hex, SA) V3 **Operator:** SYSTEM  
**Instrument:** 1100HPLC **Injection date:** 2021-06-14 12:07:06+01:00  
**Inj. volume:** 25.000 **Location:** 10  
**Acq. method:** 15% IPA-HEX 30 mins.amx **Type:** Sample  
**Processing method:** 3D UV Quantitative\_DefaultMethod.pmx **Sample amount:** 0.00  
**Manually modified:** Manual Integration

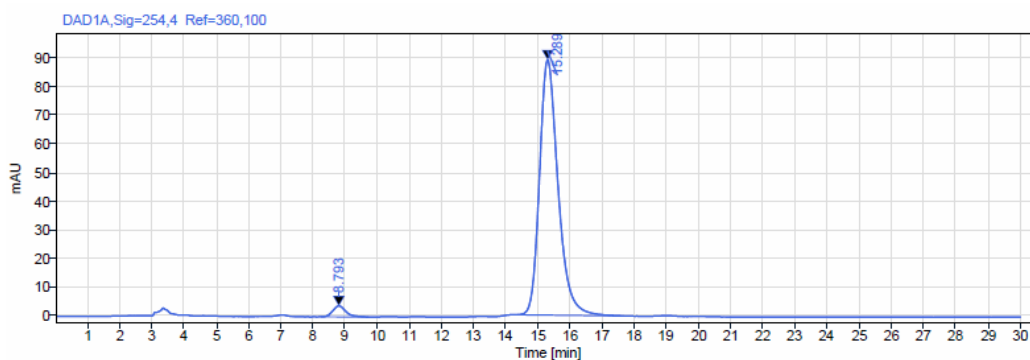

Signal: DAD1A, Sig=254,4 Ref=360,100

| RT [min] | Type | Width [min] | Area    | Height | Area% | Name |
|----------|------|-------------|---------|--------|-------|------|
| 8.793    | BB   | 1.47        | 107.90  | 3.84   | 2.93  |      |
| 15.289   | BB   | 3.32        | 3579.20 | 89.24  | 97.07 |      |
|          | Sum  |             | 3687.10 |        |       |      |

Racemic trace

Single Injection Report

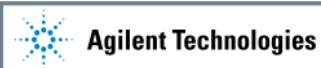

**Data file:** WR 2.162 Rac.dx  
**Sequence Name:** SingleSample **Project Name:** WR  
**Sample name:** WR 2.162 Rac **Operator:** SYSTEM  
**Instrument:** 1100HPLC **Injection date:** 2021-06-18 14:37:00+01:00  
**Inj. volume:** 25.000 **Location:** 42  
**Acq. method:** 15% IPA-HEX 30 mins.amx **Type:** Sample  
**Processing method:** 3D UV Quantitative\_DefaultMethod.pmx **Sample amount:** 0.00  
**Manually modified:** Manual Integration

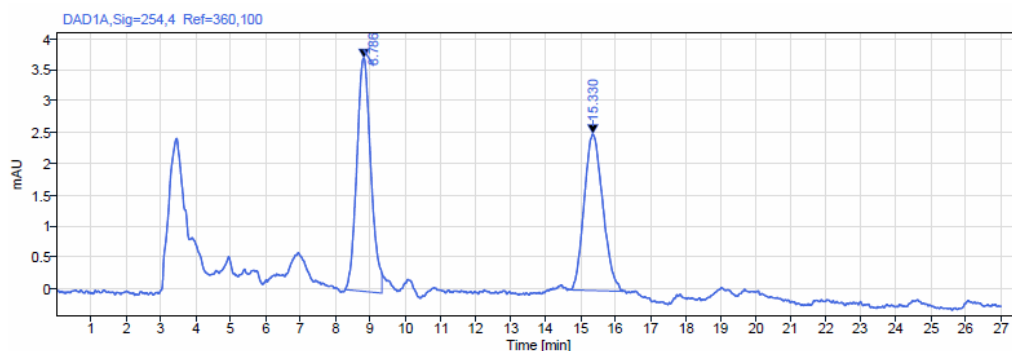

Signal: DAD1A,Sig=254,4 Ref=360,100

| RT [min] | Type | Width [min] | Area   | Height | Area% | Name |
|----------|------|-------------|--------|--------|-------|------|
| 8.786    | MM m | 0.42        | 103.95 | 3.73   | 52.88 |      |
| 15.330   | BB   | 1.49        | 92.63  | 2.50   | 47.12 |      |
|          |      | Sum         | 196.58 |        |       |      |



1-Methyl-2-oxo-4'-phenyl-5'-(trifluoromethyl)spiro[indoline-3,2'-pyrrolidine]-3',3'-dicarbonitrile (3k)



**Conditions:** Chiral art Amylose-SA (with column guard), 15% IPA-hexane 1.0 mL/min,  $\lambda = 254 \text{ nm}$ ,  
 $t_R$  (major) = 13.3 min,  $t_R$  (minor) = 8.7 min.

Asymmetric trace: 85% ee

Single Injection Report 

**Data file:** WR 2.168 F1 (15% IPA-Hex, 25 uL) run 2.dx  
**Sequence Name:** SingleSample **Project Name:** WR  
**Sample name:** WR 2.168 F1 (15% IPA-Hex, 25 uL) run 2 **Operator:** SYSTEM  
**Instrument:** 1100HPLC **Injection date:** 2021-06-03 11:44:12+01:00  
**Inj. volume:** 25.000 **Location:** 12  
**Acq. method:** 15% IPA-HEX 30 mins.amx **Type:** Sample  
**Processing method:** 3D UV Quantitative\_DefaultMethod.pmx **Sample amount:** 0.00  
**Manually modified:** Manual Integration

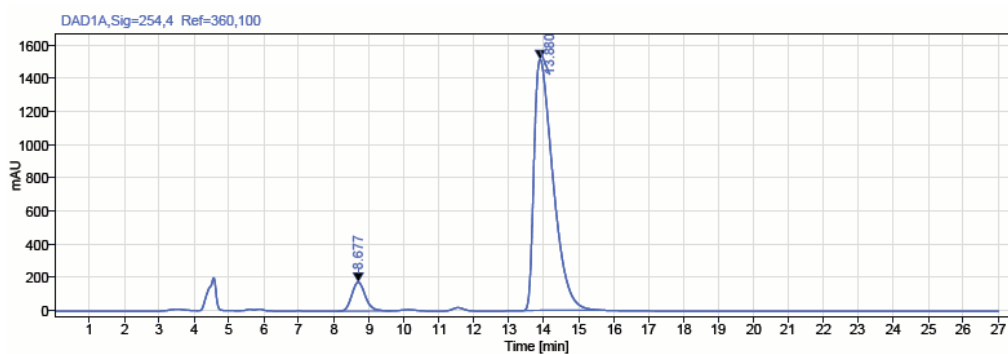

Signal: DAD1A, Sig=254,4 Ref=360,100

| RT [min] | Type | Width [min] | Area     | Height  | Area% | Name |
|----------|------|-------------|----------|---------|-------|------|
| 8.677    | VB   | 1.55        | 4683.00  | 174.11  | 7.58  |      |
| 13.880   | MM m | 0.57        | 57086.10 | 1514.19 | 92.42 |      |
|          |      | Sum         | 61769.10 |         |       |      |

Racemic trace

**Single Injection Report** 

**Data file:** WR 2.168 RAC (15% IPA,Hex, SA).dx  
**Sequence Name:** SingleSample **Project Name:** WR  
**Sample name:** WR 2.168 RAC (15% IPA,Hex, SA) **Operator:** SYSTEM  
**Instrument:** 1100HPLC **Injection date:** 2021-06-04 12:08:52+01:00  
**Inj. volume:** 25.000 **Location:** 3  
**Acq. method:** 15% IPA-HEX 30 mins.amx **Type:** Sample  
**Processing method:** 3D UV Quantitative\_DefaultMethod.pmx **Sample amount:** 0.00  
**Manually modified:** Manual Integration

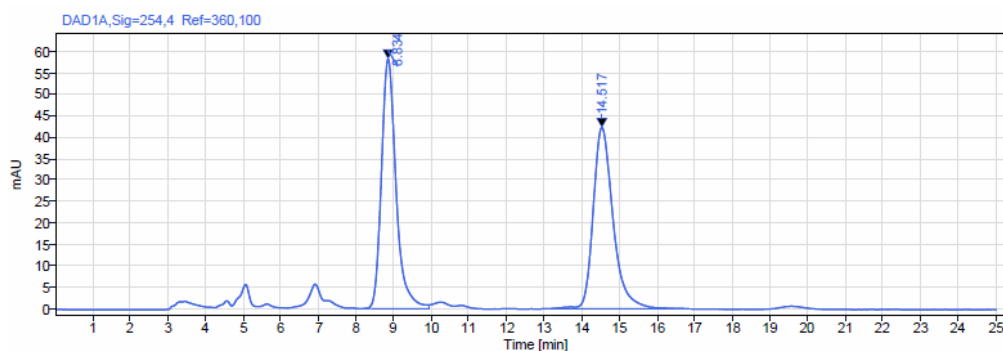

Signal: DAD1A,Sig=254,4 Ref=360,100

| RT [min] | Type | Width [min] | Area    | Height | Area% | Name |
|----------|------|-------------|---------|--------|-------|------|
| 8.834    | BV   | 1.70        | 1566.70 | 58.11  | 50.28 |      |
| 14.517   | BV   | 3.27        | 1549.17 | 42.16  | 49.72 |      |
|          |      | Sum         | 3115.87 |        |       |      |

Ethyl-1-benzyl-3'-cyano-2-oxo-4'-phenyl-5'-(trifluoromethyl)spiro[indoline-3,2'-pyrrolidine]-3'-carboxylate (3)

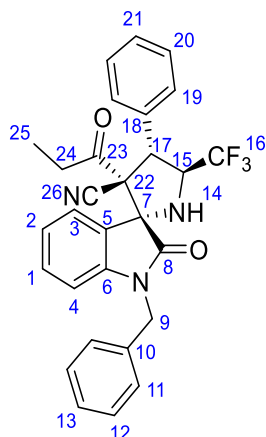

**Conditions:** Chiral art Amylose-SA (with column guard), 15% IPA-hexane 1.0 mL/min,  $\lambda = 254$  nm,  $t_R$  (major) = 18.9 min,  $t_R$  (minor) = 9.8 min.

Asymmetric trace: 94% ee

## Single Injection Report

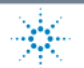

Agilent Technologies

|                           |                                         |                        |                           |
|---------------------------|-----------------------------------------|------------------------|---------------------------|
| <b>Data file:</b>         | WR 2.170 (15% IPA,Hex, SA).dx           | <b>Project Name:</b>   | WR                        |
| <b>Sequence Name:</b>     | SingleSample                            | <b>Operator:</b>       | SYSTEM                    |
| <b>Sample name:</b>       | WR 2.170 (15% IPA,Hex, SA)              | <b>Injection date:</b> | 2021-06-04 12:35:11+01:00 |
| <b>Instrument:</b>        | 1100HPLC                                | <b>Location:</b>       | 4                         |
| <b>Inj. volume:</b>       | 25.000                                  | <b>Type:</b>           | Sample                    |
| <b>Acq. method:</b>       | 15% IPA-HEX 30 mins.amx                 | <b>Sample amount:</b>  | 0.00                      |
| <b>Processing method:</b> | 3D UV<br>Quantitative_DefaultMethod.pmx |                        |                           |
| <b>Manually modified:</b> | Manual Integration                      |                        |                           |

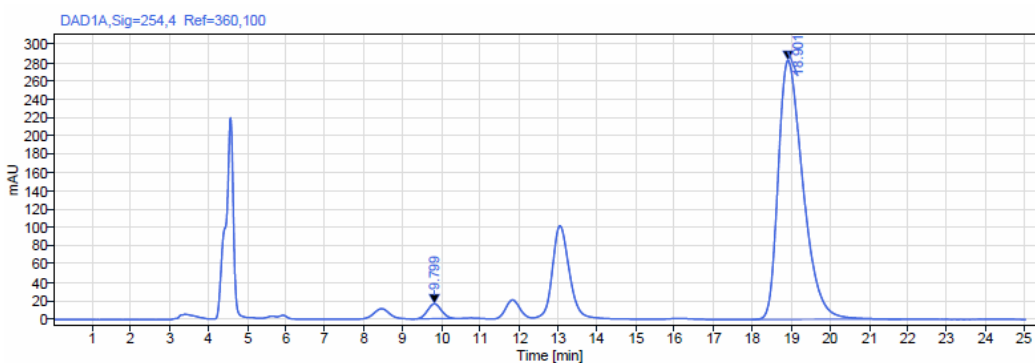

Signal: DAD1A,Sig=254,4 Ref=360,100

| RT [min] | Type | Width [min] | Area     | Height | Area% | Name |
|----------|------|-------------|----------|--------|-------|------|
| 9.799    | MM m | 0.38        | 400.76   | 16.13  | 3.10  |      |
| 18.901   | BB   | 3.83        | 12516.69 | 282.80 | 96.90 |      |
|          | Sum  |             | 12917.46 |        |       |      |

Racemic trace

**Single Injection Report** 

**Data file:** WR 2.139 Vial 6 repeat (CAD 1-45 rac).dx  
**Sequence Name:** SingleSample **Project Name:** WR  
**Sample name:** WR 2.139 Vial 6 repeat (CAD 1-45 rac) **Operator:** SYSTEM  
**Instrument:** 1100HPLC **Injection date:** 2021-03-30 15:15:07+01:00  
**Inj. volume:** 25.000 **Location:** 7  
**Acq. method:** 15% IPA-HEX 30 mins.amx **Type:** Sample  
**Processing method:** 3D UV Quantitative\_DefaultMethod.pmx **Sample amount:** 0.00  
**Manually modified:** Manual Integration

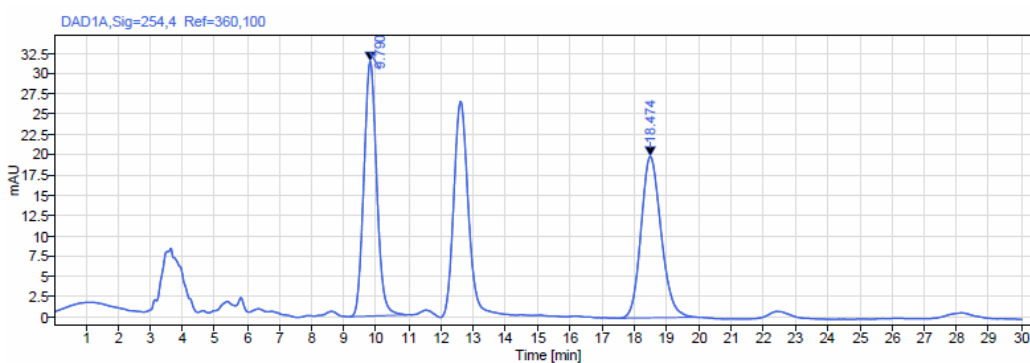

Signal: DAD1A, Sig=254,4 Ref=360,100

| RT [min] | Type | Width [min] | Area    | Height | Area% | Name |
|----------|------|-------------|---------|--------|-------|------|
| 9.790    | BB   | 1.78        | 864.98  | 31.38  | 50.16 |      |
| 18.474   | BB   | 2.42        | 859.41  | 19.90  | 49.84 |      |
|          |      | Sum         | 1724.40 |        |       |      |

1-Benzyl-2-oxo-4'-phenyl-5'-(trifluoromethyl)spiro[indoline-3,2'-pyrrolidine]-3',3'-dicarbonitrile (**3m**)

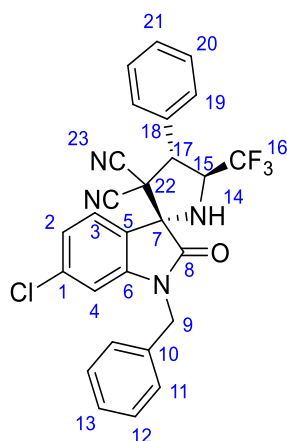

**Conditions:** Chiral ART Amylose-SB (with column guard), 20% IPA-hexane 1.0 mL/min,  $\lambda = 254 \text{ nm}$ ,  $t_R$  (major) = 13.1 min,  $t_R$  (minor) = 7.6 min.

Asymmetric trace: 89% ee

## Single Injection Report

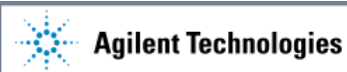

|                           |                                               |                        |                           |
|---------------------------|-----------------------------------------------|------------------------|---------------------------|
| <b>Data file:</b>         | WR 2.226 Run 2 (20% IPA-Hexane, SB, 25 ul).dx |                        |                           |
| <b>Sequence Name:</b>     | SingleSample                                  | <b>Project Name:</b>   | WR                        |
| <b>Sample name:</b>       | WR 2.226 Run 2 (20% IPA-Hexane, SB, 25 ul)    | <b>Operator:</b>       | SYSTEM                    |
| <b>Instrument:</b>        | 1100HPLC                                      | <b>Injection date:</b> | 2021-10-11 10:12:13+01:00 |
| <b>Inj. volume:</b>       | 25.000                                        | <b>Location:</b>       | 1                         |
| <b>Acq. method:</b>       | 20% IPA-HEX 60 mins.amx                       | <b>Type:</b>           | Sample                    |
| <b>Processing method:</b> | 3D UV<br>Quantitative_DefaultMethod.pmx       | <b>Sample amount:</b>  | 0.00                      |
| <b>Manually modified:</b> | Manual Integration                            |                        |                           |

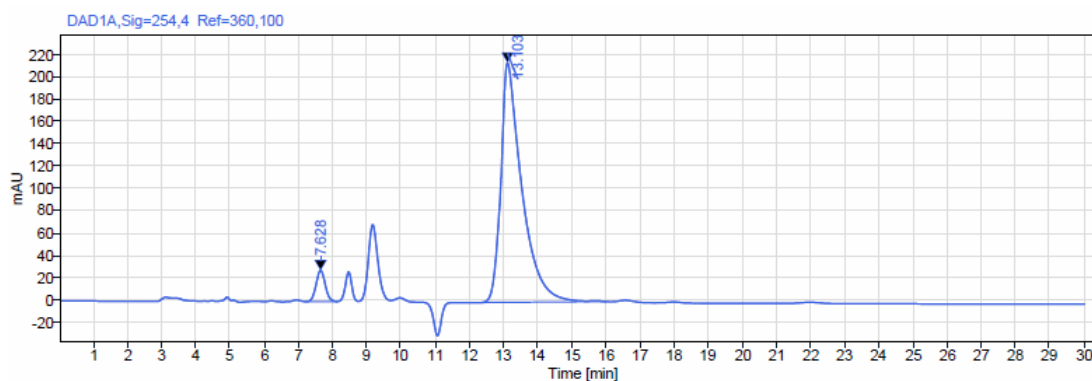

Signal: DAD1A,Sig=254,4 Ref=360,100

| RT [min] | Type | Width [min] | Area    | Height | Area% | Name |
|----------|------|-------------|---------|--------|-------|------|
| 7.628    | VB   | 0.91        | 519.38  | 27.92  | 5.36  |      |
| 13.103   | MM m | 0.60        | 9162.92 | 214.79 | 94.64 |      |
|          |      | Sum         | 9682.31 |        |       |      |

Racemic trace

**Single Injection Report** 

**Data file:** WR 2.226 RAC V2 (20% IPA-Hexane, SB, 25 ul).dx  
**Sequence Name:** SingleSample **Project Name:** WR  
**Sample name:** WR 2.226 RAC V2 (20% IPA-Hexane, SB, 25 ul) **Operator:** SYSTEM  
**Instrument:** 1100HPLC **Injection date:** 2021-10-11 12:05:56+01:00  
**Inj. volume:** 25.000 **Location:** 11  
**Acq. method:** 20% IPA-HEX 30 mins.amx **Type:** Sample  
**Processing method:** 3D UV Quantitative\_DefaultMethod.pmx **Sample amount:** 0.00  
**Manually modified:** Manual Integration

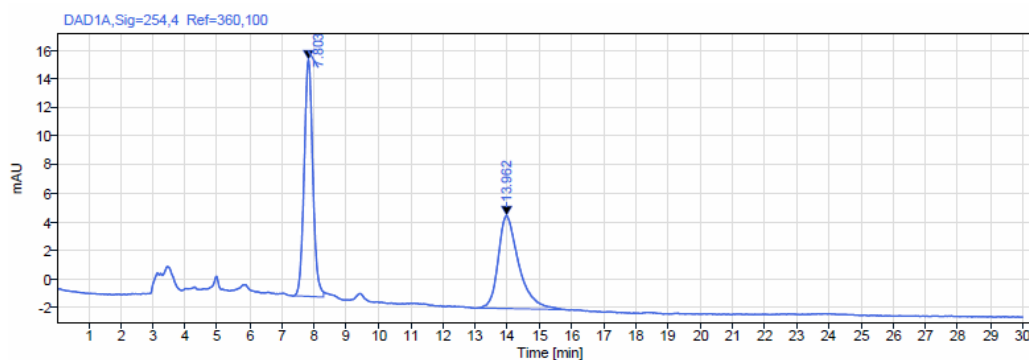

Signal: DAD1A,Sig=254,4 Ref=360,100

| RT [min] | Type | Width [min] | Area   | Height | Area% | Name |
|----------|------|-------------|--------|--------|-------|------|
| 7.803    | MM m | 0.29        | 308.86 | 16.55  | 51.74 |      |
| 13.962   | BB   | 2.59        | 288.11 | 6.48   | 48.26 |      |
|          |      | Sum         | 596.97 |        |       |      |

1-benzyl-5-methoxy-2-oxo-4'-phenyl-5'-(trifluoromethyl)spiro[indoline-3,2'-pyrrolidine]-3',3'-dicarbonitrile (3n)



**Conditions:** Chiral ART Amylose-SA (with column guard), 15% IPA-hexane 1.0 mL/min,  $\lambda = 254 \text{ nm}$ ,  $t_R$  (major) = 32.2 min,  $t_R$  (minor) = 10.1 min.

Asymmetric trace: 93% ee

Single Injection Report 

**Data file:** WR 2.231 V2 (15% IPA-Hexane, SA, 25 ul).dx  
**Sequence Name:** SingleSample **Project Name:** WR  
**Sample name:** WR 2.231 V2 (15% IPA-Hexane, SA, 25 ul) **Operator:** SYSTEM  
**Instrument:** 1100HPLC **Injection date:** 2021-10-13 16:09:41+01:00  
**Inj. volume:** 25.000 **Location:** 21  
**Acq. method:** 15% IPA-HEX 45 mins.amx **Type:** Sample  
**Processing method:** 3D UV Quantitative\_DefaultMethod.pmx **Sample amount:** 0.00  
**Manually modified:** Manual Integration

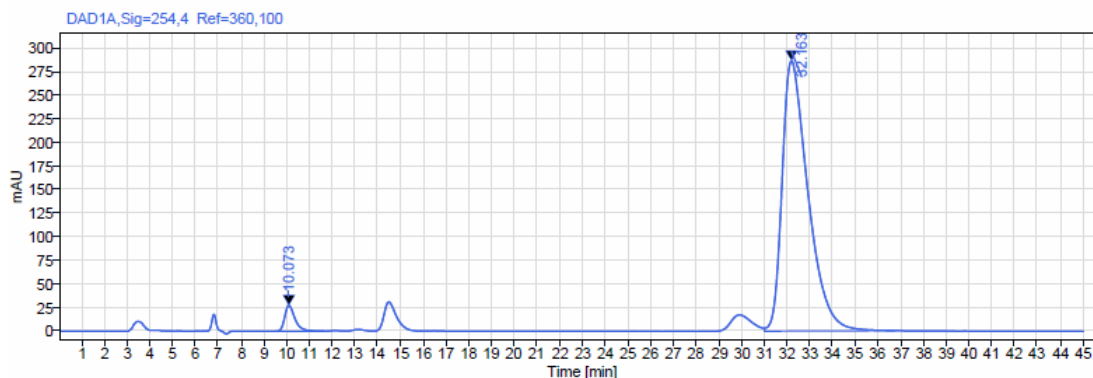

Signal: DAD1A, Sig=254,4 Ref=360,100

| RT [min] | Type | Width [min] | Area     | Height | Area% | Name |
|----------|------|-------------|----------|--------|-------|------|
| 10.073   | BV   | 2.27        | 865.03   | 27.39  | 3.67  |      |
| 32.163   | VB   | 5.72        | 22691.00 | 287.16 | 96.33 |      |
|          | Sum  |             | 23556.03 |        |       |      |

# Single Injection Report

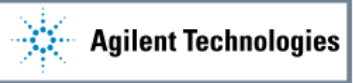

|                           |                                                |                        |                           |
|---------------------------|------------------------------------------------|------------------------|---------------------------|
| <b>Data file:</b>         | WR 2.231 RAC V2 (15% IPA-Hexane, SA, 25 ul).dx |                        |                           |
| <b>Sequence Name:</b>     | SingleSample                                   | <b>Project Name:</b>   | WR                        |
| <b>Sample name:</b>       | WR 2.231 RAC V2 (15% IPA-Hexane, SA, 25 ul)    | <b>Operator:</b>       | SYSTEM                    |
| <b>Instrument:</b>        | 1100HPLC                                       | <b>Injection date:</b> | 2021-10-13 15:21:21+01:00 |
| <b>Inj. volume:</b>       | 25.000                                         | <b>Location:</b>       | 22                        |
| <b>Acq. method:</b>       | 15% IPA-HEX 45 mins.amx                        | <b>Type:</b>           | Sample                    |
| <b>Processing method:</b> | 3D UV<br>Quantitative_DefaultMethod.pmx        | <b>Sample amount:</b>  | 0.00                      |
| <b>Manually modified:</b> | Manual Integration                             |                        |                           |

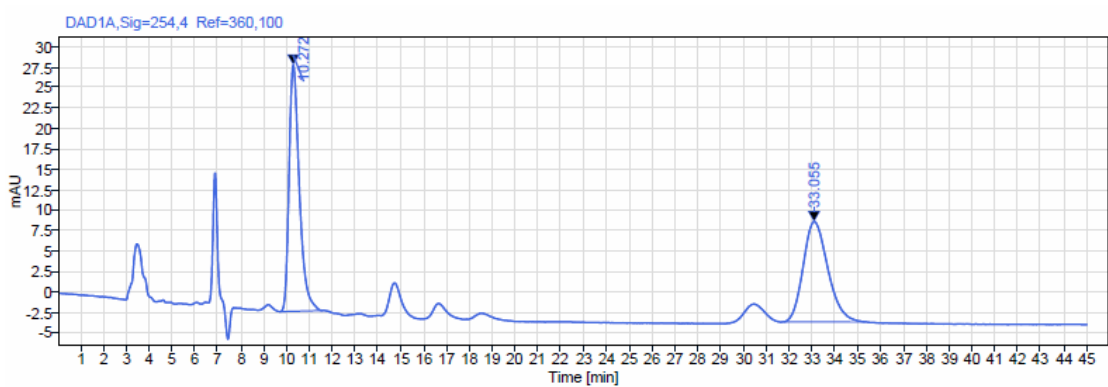

Signal: DAD1A, Sig=254,4 Ref=360,100

| RT [min] | Type | Width [min] | Area    | Height | Area% | Name |
|----------|------|-------------|---------|--------|-------|------|
| 10.272   | BB   | 1.84        | 940.39  | 30.15  | 50.52 |      |
| 33.055   | BB   | 3.54        | 921.03  | 12.27  | 49.48 |      |
|          | Sum  |             | 1861.42 |        |       |      |



**1-Benzyl-2-oxo-4'-phenethyl-5'-(trifluoromethyl)spiro[indoline-3,2'-pyrrolidine]-3',3'-dicarbonitrile (30)**

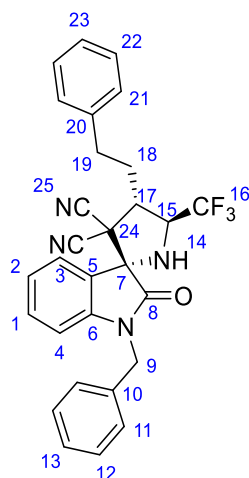

**Conditions:** Chiral ART Amylose-SA (with column guard), 20% IPA-hexane 1.0 mL/min,  $\lambda = 254$  nm,  $t_R$  (major) = 12.6 min,  $t_R$  (minor) = 7.5 min.

Asymmetric trace: 73% ee

**Single Injection Report**  **Agilent Technologies**

|                           |                                         |                        |                           |
|---------------------------|-----------------------------------------|------------------------|---------------------------|
| <b>Data file:</b>         | WR 2.227 (15% IPA-Hexane, SA, 25 ul).dx | <b>Project Name:</b>   | WR                        |
| <b>Sequence Name:</b>     | SingleSample                            | <b>Operator:</b>       | SYSTEM                    |
| <b>Sample name:</b>       | WR 2.227 (15% IPA-Hexane, SA, 25 ul)    | <b>Injection date:</b> | 2021-10-04 14:44:45+01:00 |
| <b>Instrument:</b>        | 1100HPLC                                | <b>Location:</b>       | 2                         |
| <b>Inj. volume:</b>       | 25.000                                  | <b>Type:</b>           | Sample                    |
| <b>Acq. method:</b>       | 15% IPA-HEX 30 mins.amx                 | <b>Sample amount:</b>  | 0.00                      |
| <b>Processing method:</b> | 3D UV<br>Quantitative_DefaultMethod.pmx |                        |                           |
| <b>Manually modified:</b> | Manual Integration                      |                        |                           |

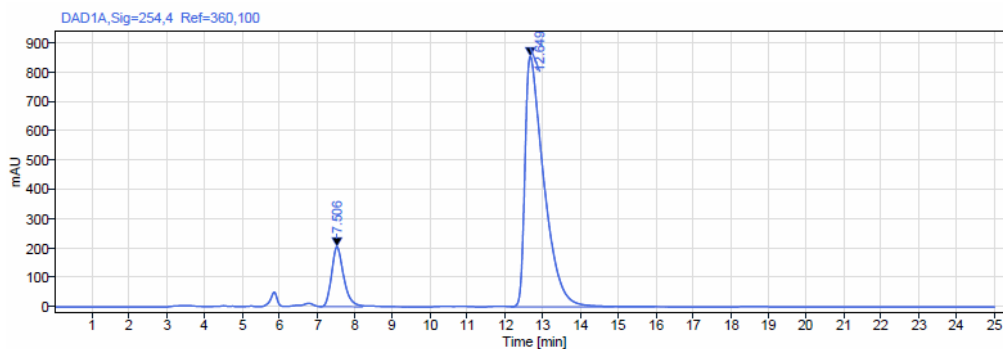

Signal: DAD1A, Sig=254.4 Ref=360,100

| RT [min] | Type | Width [min] | Area     | Height | Area% | Name |
|----------|------|-------------|----------|--------|-------|------|
| 7.506    | MM m | 0.34        | 4565.19  | 203.95 | 13.27 |      |
| 12.649   | VV   | 3.82        | 29841.96 | 855.25 | 86.73 |      |
|          | Sum  |             | 34407.15 |        |       |      |

## Single Injection Report

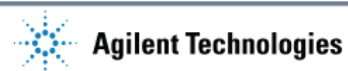

**Data file:** WR 2.227 RAC (15% IPA-Hexane, SA, 25 ul).dx  
**Sequence Name:** SingleSample **Project Name:** WR  
**Sample name:** WR 2.227 RAC (15% IPA-Hexane, SA, 25 ul) **Operator:** SYSTEM  
**Instrument:** 1100HPLC **Injection date:** 2021-10-04 16:14:37+01:00  
**Inj. volume:** 25.000 **Location:** 4  
**Acq. method:** 15% IPA-HEX 30 mins.amx **Type:** Sample  
**Processing method:** 3D UV Quantitative\_DefaultMethod.pmx **Sample amount:** 0.00  
**Manually modified:** Manual Integration

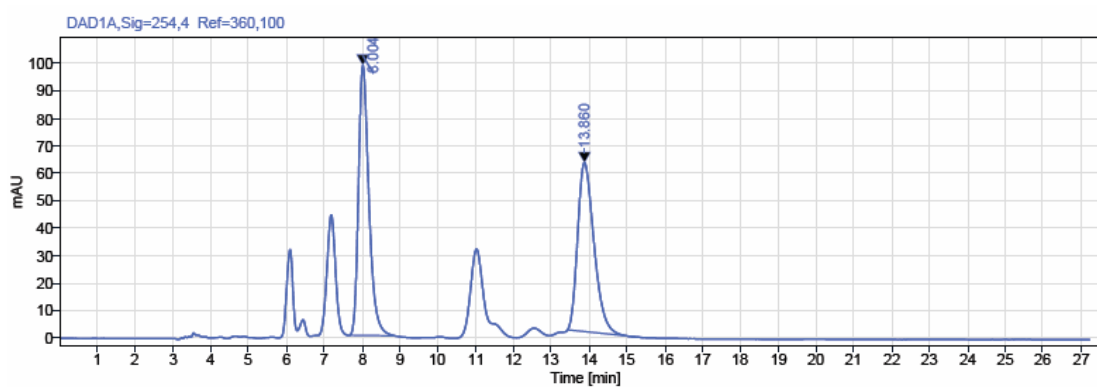

Signal: DAD1A,Sig=254,4 Ref=360,100

| RT [min] | Type | Width [min] | Area    | Height | Area% | Name |
|----------|------|-------------|---------|--------|-------|------|
| 8.004    | MM m | 0.29        | 1877.83 | 98.58  | 50.43 |      |
| 13.860   | MM m | 0.46        | 1845.80 | 61.61  | 49.57 |      |
|          |      | Sum         | 3723.63 |        |       |      |

1''-benzyl-4'-phenyl-5'-(trifluoromethyl)dispiro[indene-2,3'-pyrrolidine-2',3''-indoline]-1,2'',3-trione (5a)

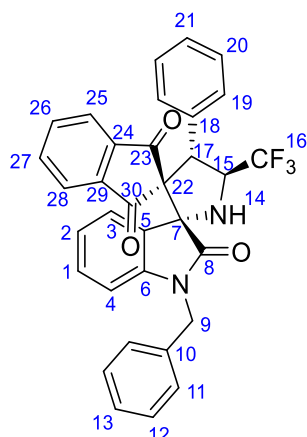

**Conditions:** Chiral art Amylose-SA (with column guard), 35% CHCl<sub>3</sub>-hexane 1.0 mL/min, λ = 254 nm, t<sub>R</sub> (major) = 10.7 min, t<sub>R</sub> (minor) = 5.4 min.

Asymmetric trace: 85% ee

Single Injection Report 

**Data file:** WR 1.136 V3 (35% CHCl<sub>3</sub>-Hex, SA, 5 uL).dx  
**Sequence Name:** SingleSample **Project Name:** WR  
**Sample name:** WR 1.136 V3 (35% CHCl<sub>3</sub>-Hex, SA, 5 uL) **Operator:** SYSTEM  
**Instrument:** 1100HPLC **Injection date:** 2021-07-02 12:51:07+01:00  
**Inj. volume:** 5.000 **Location:** 6  
**Acq. method:** 35% CHCl<sub>3</sub> 30 mins 5 micro L.amx **Type:** Sample  
**Processing method:** 3D UV Quantitative\_DefaultMethod.pmx **Sample amount:** 0.00  
**Manually modified:** Manual Integration

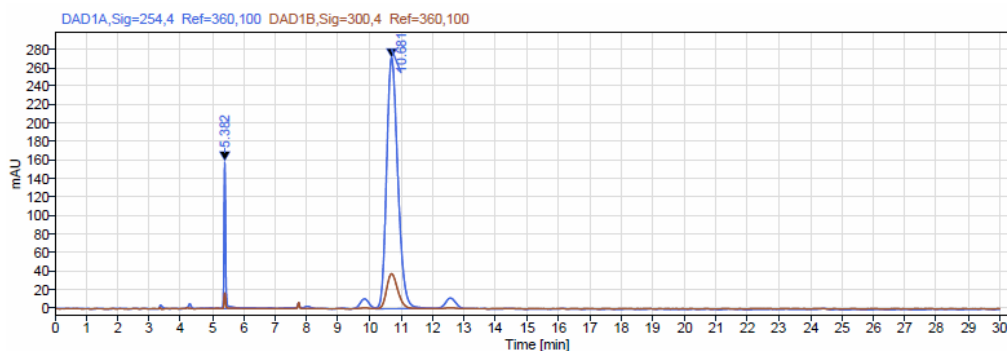

Signal: DAD1A, Sig=254,4 Ref=360,100

| RT [min] | Type | Width [min] | Area    | Height | Area% | Name |
|----------|------|-------------|---------|--------|-------|------|
| 5.382    | VV   | 0.57        | 543.23  | 159.05 | 7.47  |      |
| 10.681   | VV   | 1.88        | 6731.52 | 270.82 | 92.53 |      |
|          |      | Sum         | 7274.75 |        |       |      |

Racemic trace

**Single Injection Report** 

**Data file:** WR 1.136 RAC (35% CHCl3-Hex, SA, 10 uL).dx  
**Sequence Name:** SingleSample **Project Name:** WR  
**Sample name:** WR 1.136 RAC (35% CHCl3-Hex, SA, 10 uL) **Operator:** SYSTEM  
**Instrument:** 1100HPLC **Injection date:** 2021-07-02 11:44:03+01:00  
**Inj. volume:** 10.000 **Location:** 1  
**Acq. method:** 35% CHCl3 30 mins 10 micro L.amx **Type:** Sample  
**Processing method:** 3D UV Quantitative\_DefaultMethod.pmx **Sample amount:** 0.00  
**Manually modified:** Manual Integration

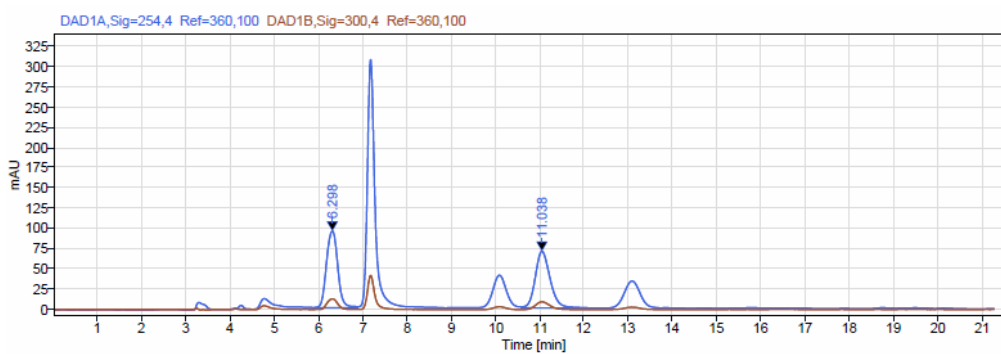

Signal: DAD1A,Sig=254,4 Ref=360,100

| RT [min] | Type | Width [min] | Area    | Height | Area% | Name |
|----------|------|-------------|---------|--------|-------|------|
| 6.298    | BV   | 0.99        | 1672.26 | 94.68  | 50.82 |      |
| 11.038   | VB   | 1.56        | 1618.08 | 70.05  | 49.18 |      |
|          |      | Sum         | 3290.35 |        |       |      |

## 5 Kinetic Study

### 5.1 Kinetic profiling and catalyst screening experiments

Prior to the catalyst screening, a kinetic profiling experiment was carried out with **C1** (Figure SX). 10 mol% of catalyst and 50 mol% of EtOAc (NMR standard) were added, and the reaction mixture was subjected to a series of  $^1\text{H}$  NMR experiments over the course of 24 h. The cyclization proceeds smoothly to complete conversion in around 3.5 h. The reaction mixture was then concentrated *in vacuo*, and the product then purified via prep-TLC to obtain the *ee* via HPLC: Chiral art Amylose-SA (with column guard), 15% IPA-hexane 1.0 mL/min,  $\lambda = 254$  nm,  $t_R$  (major) = 19.8 min,  $t_R$  (minor) 10.5 min.

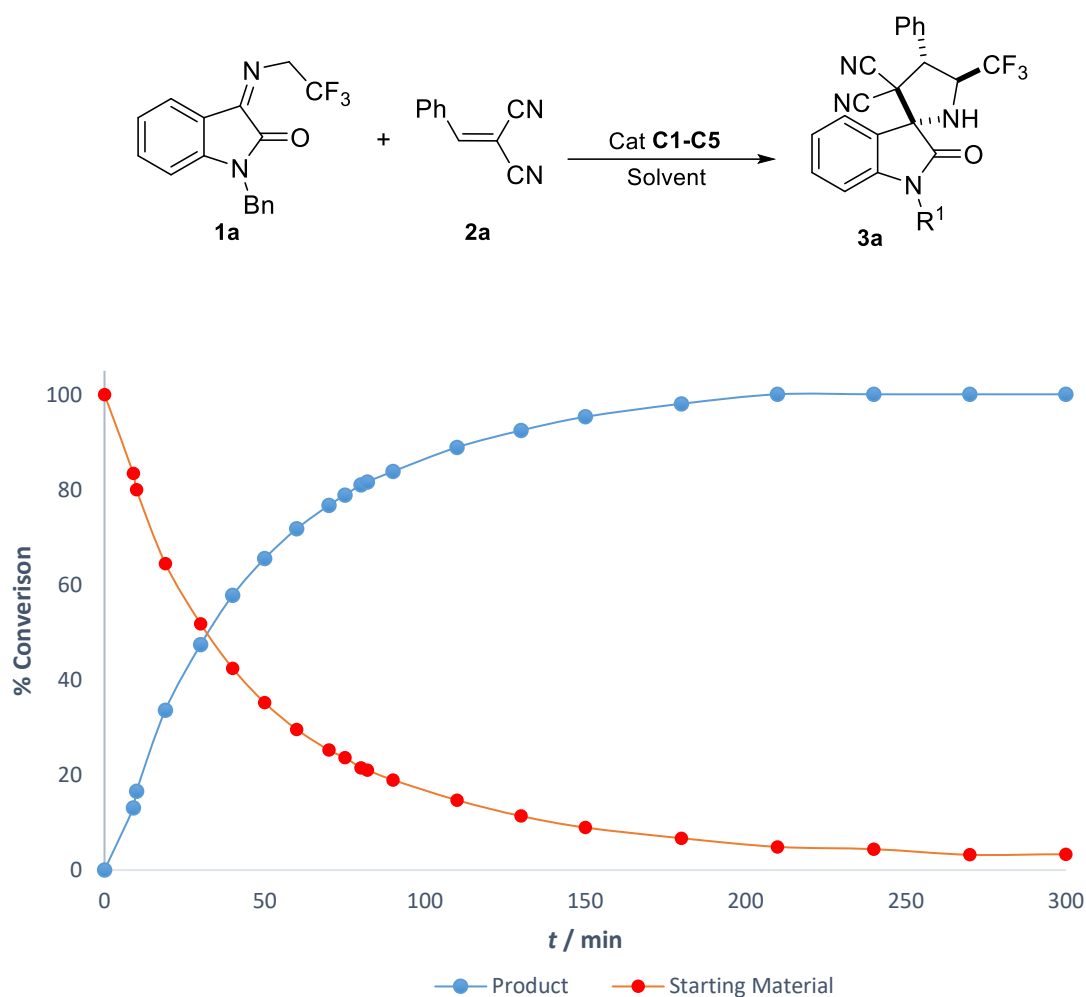

**Figure X:** Formation of spirocycle **3a** (blue) and consumption of ketimine **1a** (red) as a function of time. Reaction conditions: **1a** (0.1 mmol), **2a** (0.15 mmol), **C1** (0.01 mmol),  $\text{CD}_2\text{Cl}_2$  (1 mL), ethyl acetate (0.05 mmol).

Catalysts **C2-C5** the remaining 4 catalysts were screened by the same procedure and subjected to a series of  $^1\text{H}$  NMR experiments to compare the activity and *ee* from each catalyst (**Scheme S1** and **Figure S3**). All catalysts screened led to a reduction in *ee* and d.r. relative to **C1**.

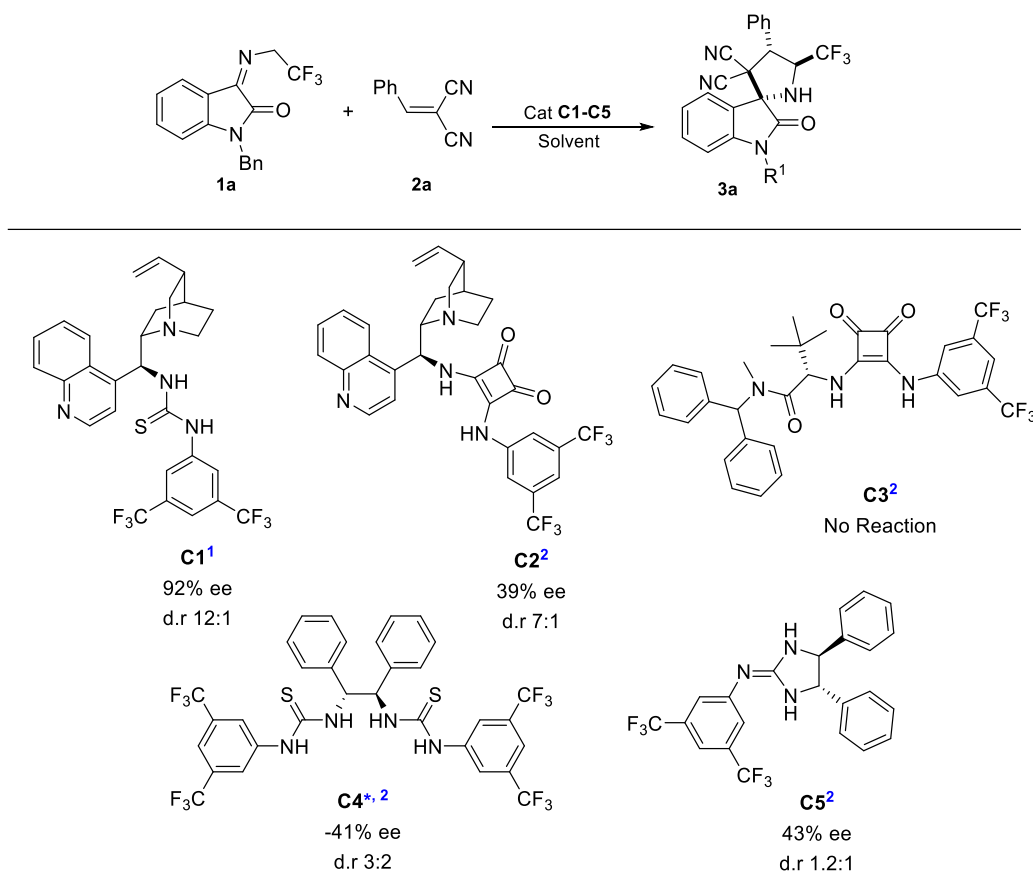

Scheme S1. [a] Reaction conditions: **108** (0.1 mmol), **111** (0.15 mmol), catalyst (0.01 mmol),  $\text{CD}_2\text{Cl}_2$  (1 mL), ethyl acetate<sup>1</sup>/triisopropylbenzene<sup>2</sup> (0.05 mmol); \*Plus  $\text{NEt}_3$  (0.01 mmol).

Internal standards were used to quantitatively measure the conversion and yield. (**Figure S3**). These indicate that the most active catalyst is **C4**,\* for which complete consumption of starting material was observed after ~30 min. However, this high reactivity was not mirrored in stereoselectivity: the major diastereomer was formed in 54% yield and -41% *ee*, and the d.r. was a mere 3:2. Squaramide catalysts **C2** and **C3** proved to be poor catalysts in terms of both conversion and stereoselectivity. The poor conversion may be attributed in part to their observed low solubilities in  $\text{CD}_2\text{Cl}_2$ . **C2** formed product slowly, ultimately reaching 72% yield after 25 h, while **C3** yielded no product at all. Lastly guanidine-

\* Used alongside  $\text{NEt}_3$  as co-catalyst. No product formation was observed after 16 h when  $\text{NEt}_3$  was added in the absence of the thiourea.

based catalyst (**C5**) catalysed the spiro-annulation slowly, and gave minimal diastereocontrol (1.2:1 d.r.). The major diastereomer was formed in 28% yield after 26 h, in 46% *ee*.

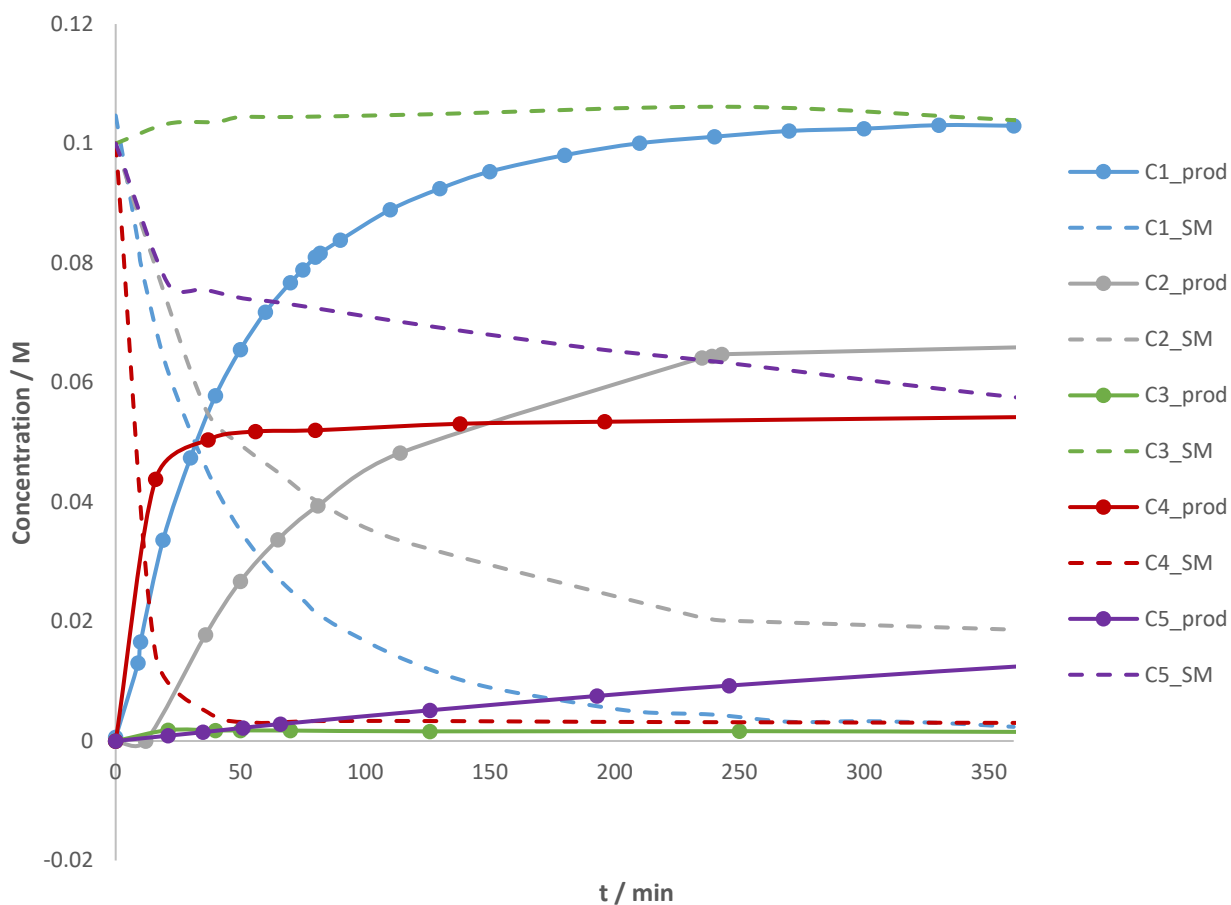

**Figure S3:** Formation of spirocycle **125** with each catalyst. Reaction conditions: **1a** (0.1 mmol), **2a** (0.15 mmol), catalyst (0.01 mmol), CD<sub>2</sub>Cl<sub>2</sub> (1 mL), internal standards: ethyl acetate or triisopropylbenzene (0.05 mmol). Solid lines indicate NMR concentration of the major diastereomer (**3a<sub>maj</sub>**), dashed lines indicate NMR concentration of the starting material (**1a**).

## 5.2 HPLCs Traces for Catalyst Screen

### Catalyst C1

**Conditions:** Chiral art Amylose-SA (with column guard), 15% IPA-hexane 1.0 mL/min,  $\lambda = 254 \text{ nm}$ ,  $t_R$  (major) = 19.4 min,  $t_R$  (minor) = 10.4 min.

Asymmetric trace: 92% ee

| Single Injection Report   |                                         | Agilent Technologies   |                           |
|---------------------------|-----------------------------------------|------------------------|---------------------------|
| <b>Data file:</b>         | CAD-1-17 SA-amylose 15% IPA 30 min.dx   |                        |                           |
| <b>Sequence Name:</b>     | SingleSample                            | <b>Project Name:</b>   | CD                        |
| <b>Sample name:</b>       | CAD-1-17 SA-amylose 15% IPA 30 min      | <b>Operator:</b>       | SYSTEM                    |
| <b>Instrument:</b>        | 1100HPLC                                | <b>Injection date:</b> | 2020-01-21 16:12:59+00:00 |
| <b>Inj. volume:</b>       | 25.000                                  | <b>Location:</b>       | 11                        |
| <b>Acq. method:</b>       | 15% IPA 30 mins.amx                     | <b>Type:</b>           | Sample                    |
| <b>Processing method:</b> | 3D UV<br>Quantitative_DefaultMethod.pmx | <b>Sample amount:</b>  | 0.00                      |
| <b>Manually modified:</b> | Manual Integration                      |                        |                           |

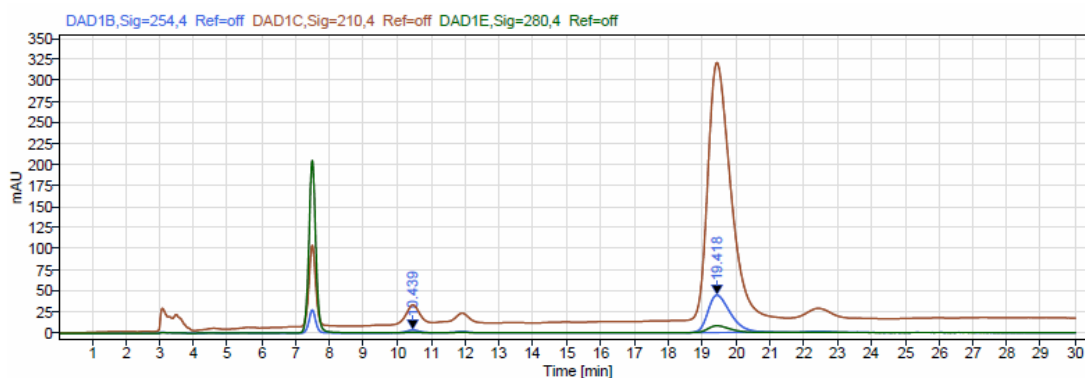

Signal: DAD1B,Sig=254,4 Ref=off

| RT [min] | Type | Width [min] | Area    | Height | Area% | Name |
|----------|------|-------------|---------|--------|-------|------|
| 10.439   | BB   | 1.14        | 83.31   | 3.16   | 3.89  |      |
| 19.418   | BB   | 3.04        | 2058.89 | 44.41  | 96.11 |      |
|          | Sum  |             | 2142.21 |        |       |      |



Catalyst C2

**Conditions:** Chiral art Amylose-SA (with column guard), 15% IPA-hexane 1.0 mL/min,  $\lambda = 254 \text{ nm}$ ,  $t_R$  (major) = 19.4 min,  $t_R$  (minor) = 10.4 min.

Asymmetric trace: 38% ee

| Single Injection Report   |                                       | Agilent Technologies   |                           |
|---------------------------|---------------------------------------|------------------------|---------------------------|
| <b>Data file:</b>         | CAD-1-30 SA-amylose 15% IPA 30 min.dx |                        |                           |
| <b>Sequence Name:</b>     | SingleSample                          | <b>Project Name:</b>   | CD                        |
| <b>Sample name:</b>       | CAD-1-30 SA-amylose 15% IPA 30 min    | <b>Operator:</b>       | SYSTEM                    |
| <b>Instrument:</b>        | 1100HPLC                              | <b>Injection date:</b> | 2020-01-31 11:26:31+00:00 |
| <b>Inj. volume:</b>       | 25.000                                | <b>Location:</b>       | 17                        |
| <b>Acq. method:</b>       | 15% IPA 30 mins.amx                   | <b>Type:</b>           | Sample                    |
| <b>Processing method:</b> | 3D UV Quantitative_DefaultMethod.pmx  | <b>Sample amount:</b>  | 0.00                      |
| <b>Manually modified:</b> | Manual Integration                    |                        |                           |

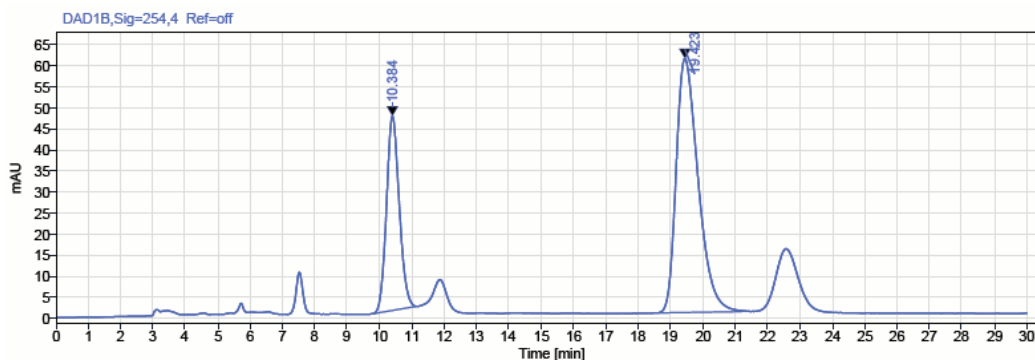

| Signal: DAD1B,Sig=254,4 Ref=off |      |             |         |        |       |      |
|---------------------------------|------|-------------|---------|--------|-------|------|
| RT [min]                        | Type | Width [min] | Area    | Height | Area% | Name |
| 10.384                          | BB   | 1.36        | 1269.46 | 46.39  | 30.78 |      |
| 19.423                          | BV   | 2.57        | 2854.92 | 60.60  | 69.22 |      |
|                                 |      | Sum         | 4124.38 |        |       |      |

## Catalyst C4

**Conditions:** Chiral art Amylose-SA (with column guard), 15% IPA-hexane 1.0 mL/min,  $\lambda = 254 \text{ nm}$ ,  
 $t_R$  (major) = 19.3 min,  $t_R$  (minor) = 10.3 min.

Asymmetric trace: -41% ee

### Single Injection Report

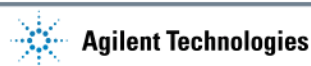

**Data file:** CAD-1-25B SA-amylose 15% IPA 30 min.dx  
**Sequence Name:** SingleSample **Project Name:** CD  
**Sample name:** CAD-1-25B SA-amylose 15% IPA 30 min **Operator:** SYSTEM  
**Instrument:** 1100HPLC **Injection date:** 2020-01-28 15:49:34+00:00  
**Inj. volume:** 25.000 **Location:** 14  
**Acq. method:** 15% IPA 30 mins.amx **Type:** Sample  
**Processing method:** 3D UV Quantitative\_DefaultMethod.pmx **Sample amount:** 0.00  
**Manually modified:** Manual Integration

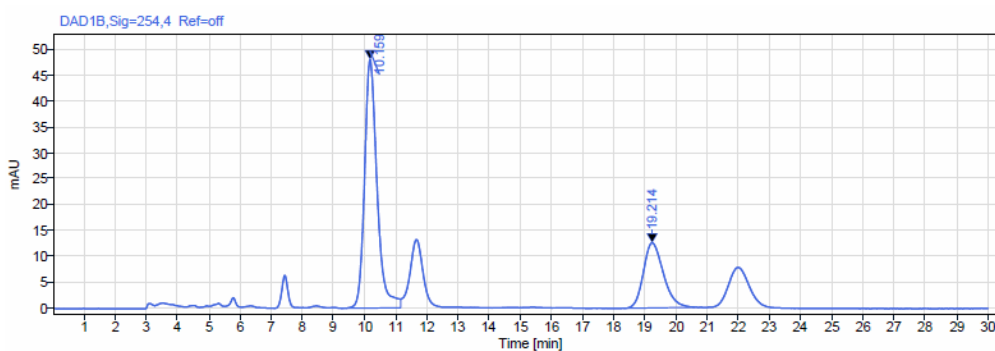

Signal: DAD1B,Sig=254,4 Ref=off

| RT [min] | Type | Width [min] | Area    | Height | Area% | Name |
|----------|------|-------------|---------|--------|-------|------|
| 10.159   | BV   | 1.77        | 1336.71 | 47.99  | 70.52 |      |
| 19.214   | BV   | 2.23        | 558.78  | 12.56  | 29.48 |      |
|          | Sum  |             | 1895.49 |        |       |      |

Catalyst C5

**Conditions:** Chiral art Amylose-SA (with column guard), 15% IPA-hexane 1.0 mL/min,  $\lambda = 254 \text{ nm}$ ,  $t_R$  (major) = 19.3 min,  $t_R$  (minor) = 10.3 min.

Asymmetric trace: 43% ee

**Single Injection Report** 

**Data file:** CAD-1-28B SA-amylose 15% IPA 30 min.dx  
**Sequence Name:** SingleSample **Project Name:** CD  
**Sample name:** CAD-1-28B SA-amylose 15% IPA 30 min **Operator:** SYSTEM  
**Instrument:** 1100HPLC **Injection date:** 2020-01-29 16:35:17+00:00  
**Inj. volume:** 25.000 **Location:** 16  
**Acq. method:** 15% IPA 30 mins.amx **Type:** Sample  
**Processing method:** 3D UV Quantitative\_DefaultMethod.pmx **Sample amount:** 0.00  
**Manually modified:** Manual Integration

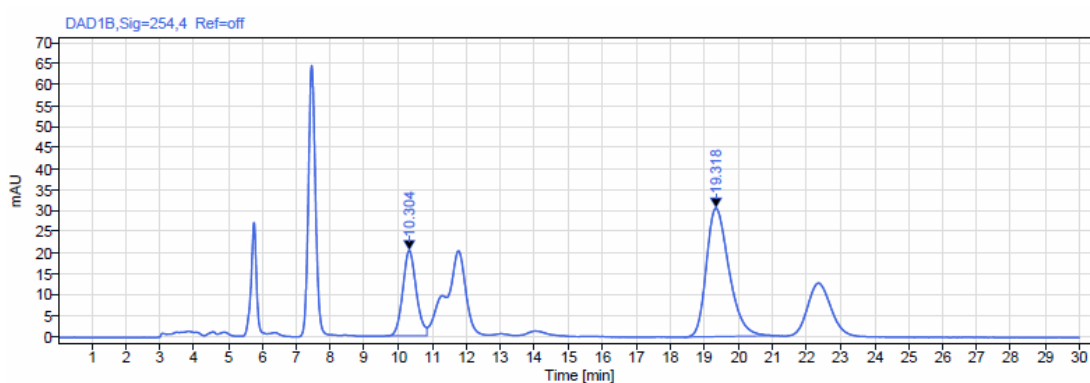

Signal: DAD1B,Sig=254,4 Ref=off

| RT [min] | Type | Width [min] | Area    | Height | Area% | Name |
|----------|------|-------------|---------|--------|-------|------|
| 10.304   | BV   | 1.16        | 557.29  | 20.28  | 28.30 |      |
| 19.318   | BB   | 2.63        | 1411.73 | 30.58  | 71.70 |      |
|          | Sum  |             | 1969.02 |        |       |      |

## 6 X-ray Crystallography

### 6.1 Single Crystal Data for (-)-3d<sub>maj</sub> (CCDC 2103731)

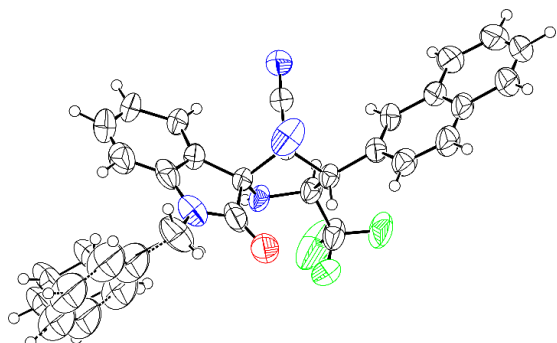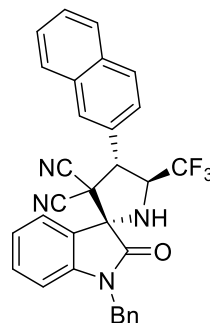

|                                                                                                                |                                                                     |
|----------------------------------------------------------------------------------------------------------------|---------------------------------------------------------------------|
| Crystal data                                                                                                   |                                                                     |
| Chemical formula                                                                                               | C <sub>31</sub> H <sub>21</sub> F <sub>3</sub> N <sub>4</sub> O     |
| <i>M</i> <sub>r</sub>                                                                                          | 522.52                                                              |
| Crystal system, space group                                                                                    | Monoclinic, <i>P</i> 2 <sub>1</sub>                                 |
| Temperature (K)                                                                                                | 150                                                                 |
| <i>a</i> , <i>b</i> , <i>c</i> (Å)                                                                             | 11.6334 (6), 6.6182 (4), 16.7064 (9)                                |
| β (°)                                                                                                          | 91.462 (5)                                                          |
| <i>V</i> (Å <sup>3</sup> )                                                                                     | 1285.84 (12)                                                        |
| <i>Z</i>                                                                                                       | 2                                                                   |
| Radiation type                                                                                                 | Cu Kα                                                               |
| μ (mm <sup>-1</sup> )                                                                                          | 0.82                                                                |
| Crystal size (mm)                                                                                              | 0.24 × 0.16 × 0.16                                                  |
| Data collection                                                                                                |                                                                     |
| Diffractometer                                                                                                 | Oxford Diffraction SuperNova                                        |
| Absorption correction                                                                                          | Multi-scan<br><i>CrysAlis PRO</i> (Rigaku Oxford Diffraction, 2017) |
| <i>T</i> <sub>min</sub> , <i>T</i> <sub>max</sub>                                                              | 0.59, 0.88                                                          |
| No. of measured, independent and observed [ <i>I</i> > 2.0σ( <i>I</i> )] reflections                           | 39351, 4910, 4258                                                   |
| <i>R</i> <sub>int</sub>                                                                                        | 0.108                                                               |
| (sin θ/λ) <sub>max</sub> (Å <sup>-1</sup> )                                                                    | 0.625                                                               |
| Refinement                                                                                                     |                                                                     |
| <i>R</i> [ <i>F</i> <sup>2</sup> > 2σ( <i>F</i> <sup>2</sup> )], <i>wR</i> ( <i>F</i> <sup>2</sup> ), <i>S</i> | 0.108, 0.354, 1.62                                                  |
| No. of reflections                                                                                             | 4910                                                                |
| No. of parameters                                                                                              | 408                                                                 |
| No. of restraints                                                                                              | 127                                                                 |
| H-atom treatment                                                                                               | H-atom parameters not refined                                       |
| Δρ <sub>max</sub> , Δρ <sub>min</sub> (e Å <sup>-3</sup> )                                                     | 1.52, -0.66                                                         |
| Absolute structure                                                                                             | Parsons, Flack & Wagner (2013), 1925 Friedel Pairs                  |
| Absolute structure parameter                                                                                   | 0.11 (7)                                                            |

## 6.2 Single Crystal Data for (-)-3l<sub>maj</sub> (CCDC 2114148)

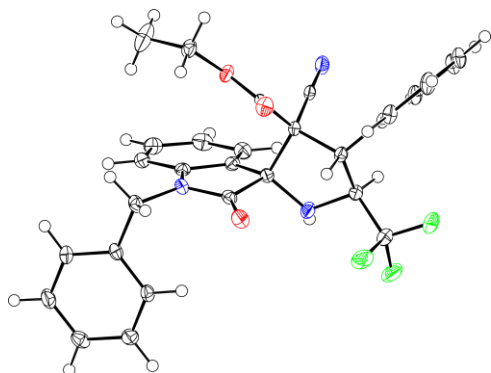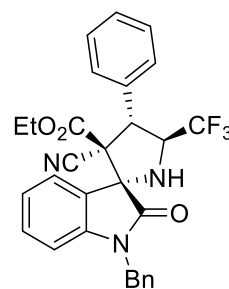

|                                                                     |                                                                              |
|---------------------------------------------------------------------|------------------------------------------------------------------------------|
| Crystal data                                                        |                                                                              |
| Chemical formula                                                    | C <sub>29</sub> H <sub>24</sub> F <sub>3</sub> N <sub>3</sub> O <sub>3</sub> |
| Mr                                                                  | 519.51                                                                       |
| Crystal system, space group                                         | Orthorhombic, P212121                                                        |
| Temperature (K)                                                     | 100                                                                          |
| a, b, c (Å)                                                         | 11.84750 (1), 13.54710 (1), 15.256700 (14)                                   |
| V (Å <sup>3</sup> )                                                 | 2448.69 (1)                                                                  |
| Z                                                                   | 4                                                                            |
| Radiation type                                                      | Cu Kα                                                                        |
| μ (mm <sup>-1</sup> )                                               | 0.91                                                                         |
| Crystal size (mm)                                                   | 0.36 × 0.28 × 0.24                                                           |
| Data collection                                                     |                                                                              |
| Diffractometer                                                      |                                                                              |
| Absorption correction                                               | Multi-scan                                                                   |
| CrysAlis PRO (Rigaku Oxford Diffraction, 2017)                      |                                                                              |
| T <sub>min</sub> , T <sub>max</sub>                                 | 0.55, 0.80                                                                   |
| No. of measured, independent and observed [I > 2.0σ(I)] reflections | 22989, 4737, 4681                                                            |
| R <sub>int</sub>                                                    | 0.000                                                                        |
| (sin θ/λ) <sub>max</sub> (Å <sup>-1</sup> )                         |                                                                              |
| Refinement                                                          |                                                                              |
| R[F <sup>2</sup> > 2σ(F <sup>2</sup> )], wR(F <sup>2</sup> ), S     | 0.026, 0.064, 0.94                                                           |
| No. of reflections                                                  | 4737                                                                         |
| No. of parameters                                                   | 344                                                                          |
| H-atom treatment                                                    | H-atom parameters not refined                                                |
| Δρ <sub>max</sub> , Δρ <sub>min</sub> (e Å <sup>-3</sup> )          | 0.28, -0.31                                                                  |
| Absolute structure                                                  | Parsons, Flack & Wagner (2013), 2037 Friedel Pairs                           |
| Absolute structure parameter                                        | 0.04 (3)                                                                     |

### 6.3 Single Crystal Data for (±)-5a (CCDC 2103730)

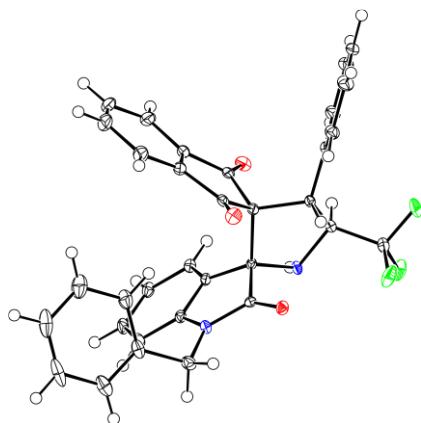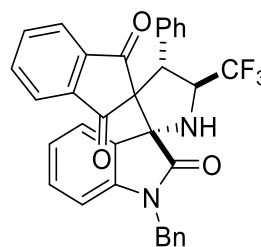

#### Crystal data

|                                    |                                                                              |
|------------------------------------|------------------------------------------------------------------------------|
| Chemical formula                   | C <sub>33</sub> H <sub>23</sub> F <sub>3</sub> N <sub>2</sub> O <sub>3</sub> |
| <i>M</i> <sub>r</sub>              | 552.53                                                                       |
| Crystal system, space group        | Monoclinic, <i>P</i> 2 <sub>1</sub> / <i>c</i>                               |
| Temperature (K)                    | 100                                                                          |
| <i>a</i> , <i>b</i> , <i>c</i> (Å) | 9.52763 (10), 22.8402 (2), 12.17728 (14)                                     |
| β (°)                              | 95.6178 (10)                                                                 |
| <i>V</i> (Å <sup>3</sup> )         | 2637.20 (5)                                                                  |
| <i>Z</i>                           | 4                                                                            |
| Radiation type                     | Cu <i>K</i> α                                                                |
| μ (mm <sup>-1</sup> )              | 0.87                                                                         |
| Crystal size (mm)                  | 0.26 × 0.14 × 0.12                                                           |

#### Data collection

|                       |                                                                     |
|-----------------------|---------------------------------------------------------------------|
| Diffractometer        | Oxford Diffraction SuperNova                                        |
| Absorption correction | Multi-scan<br><i>CrysAlis PRO</i> (Rigaku Oxford Diffraction, 2017) |

|                                                                                      |                   |
|--------------------------------------------------------------------------------------|-------------------|
| <i>T</i> <sub>min</sub> , <i>T</i> <sub>max</sub>                                    | 0.89, 0.90        |
| No. of measured, independent and observed [ <i>I</i> > 2.0σ( <i>I</i> )] reflections | 15149, 5075, 4646 |

|                                             |       |
|---------------------------------------------|-------|
| <i>R</i> <sub>int</sub>                     | 0.069 |
| (sin θ/λ) <sub>max</sub> (Å <sup>-1</sup> ) | 0.615 |

#### Refinement

|                                                                                                                |                                                                        |
|----------------------------------------------------------------------------------------------------------------|------------------------------------------------------------------------|
| <i>R</i> [ <i>F</i> <sup>2</sup> > 2σ( <i>F</i> <sup>2</sup> )], <i>wR</i> ( <i>F</i> <sup>2</sup> ), <i>S</i> | 0.046, 0.123, 1.00                                                     |
| No. of reflections                                                                                             | 5074                                                                   |
| No. of parameters                                                                                              | 374                                                                    |
| No. of restraints                                                                                              | 4                                                                      |
| H-atom treatment                                                                                               | H atoms treated by a mixture of independent and constrained refinement |
| Δρ <sub>max</sub> , Δρ <sub>min</sub> (e Å <sup>-3</sup> )                                                     | 0.28, -0.33                                                            |

## 7 NMR spectra

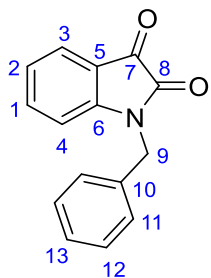

S1

<sup>1</sup>H NMR

400 MHz

CDCl<sub>3</sub>

Current Data Parameters  
 NAME CAD-1-05  
 EXPNO 10  
 PROCNO 1

F2 - Acquisition Parameters  
 Date\_ 20191018  
 Time 14.38  
 INSTRUM AVIII\_400  
 PROBHD 5 mm PABBO BB/  
 PULPROG zg30  
 TD 65536  
 SOLVENT CDCl3  
 NS 16  
 DS 2  
 SWH 8223.685 Hz  
 FIDRES 0.125483 Hz  
 AQ 3.9845889 sec  
 RG 80.6  
 DW 60.800 usec  
 DE 6.50 usec  
 TE 297.0 K  
 D1 1.00000000 sec  
 TD0 1

===== CHANNEL f1 =====  
 SFO1 399.9124696 MHz  
 NUC1 1H  
 P1 15.00 usec  
 PLW1 17.29199982 W

F2 - Processing parameters  
 SI 32768  
 SF 399.9100097 MHz  
 WDW EM  
 SSB 0  
 LB 0.30 Hz  
 GB 0  
 PC 1.00

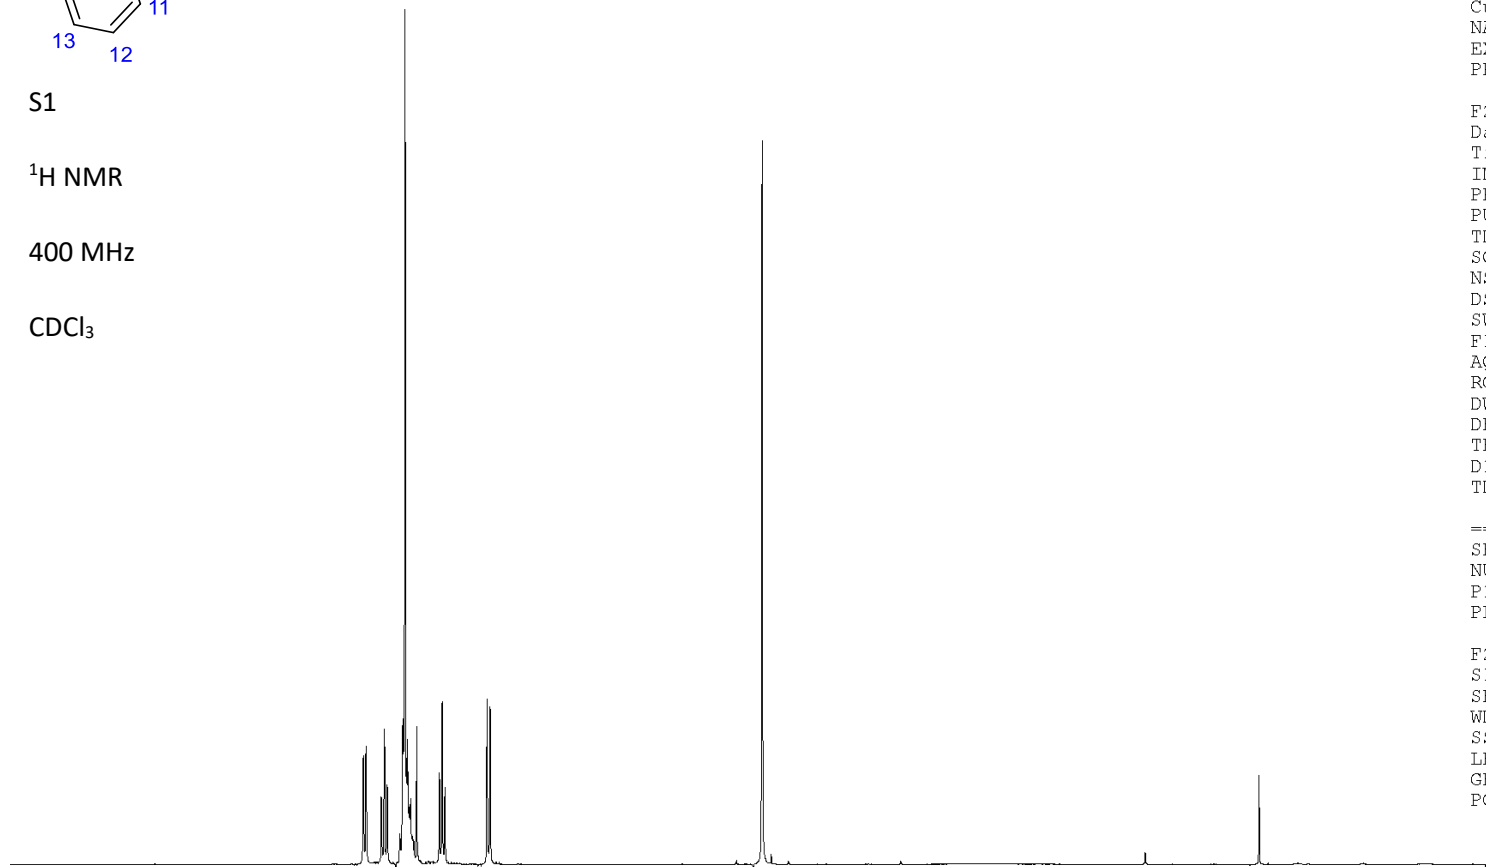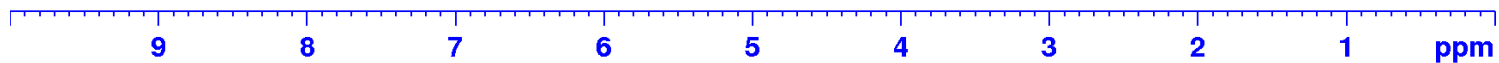

0.89  
1.01  
4.89  
1.00  
1.00

2.14



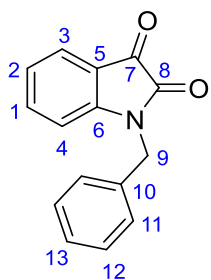

S1

<sup>13</sup>C NMR

101 MHz

CDCl<sub>3</sub>

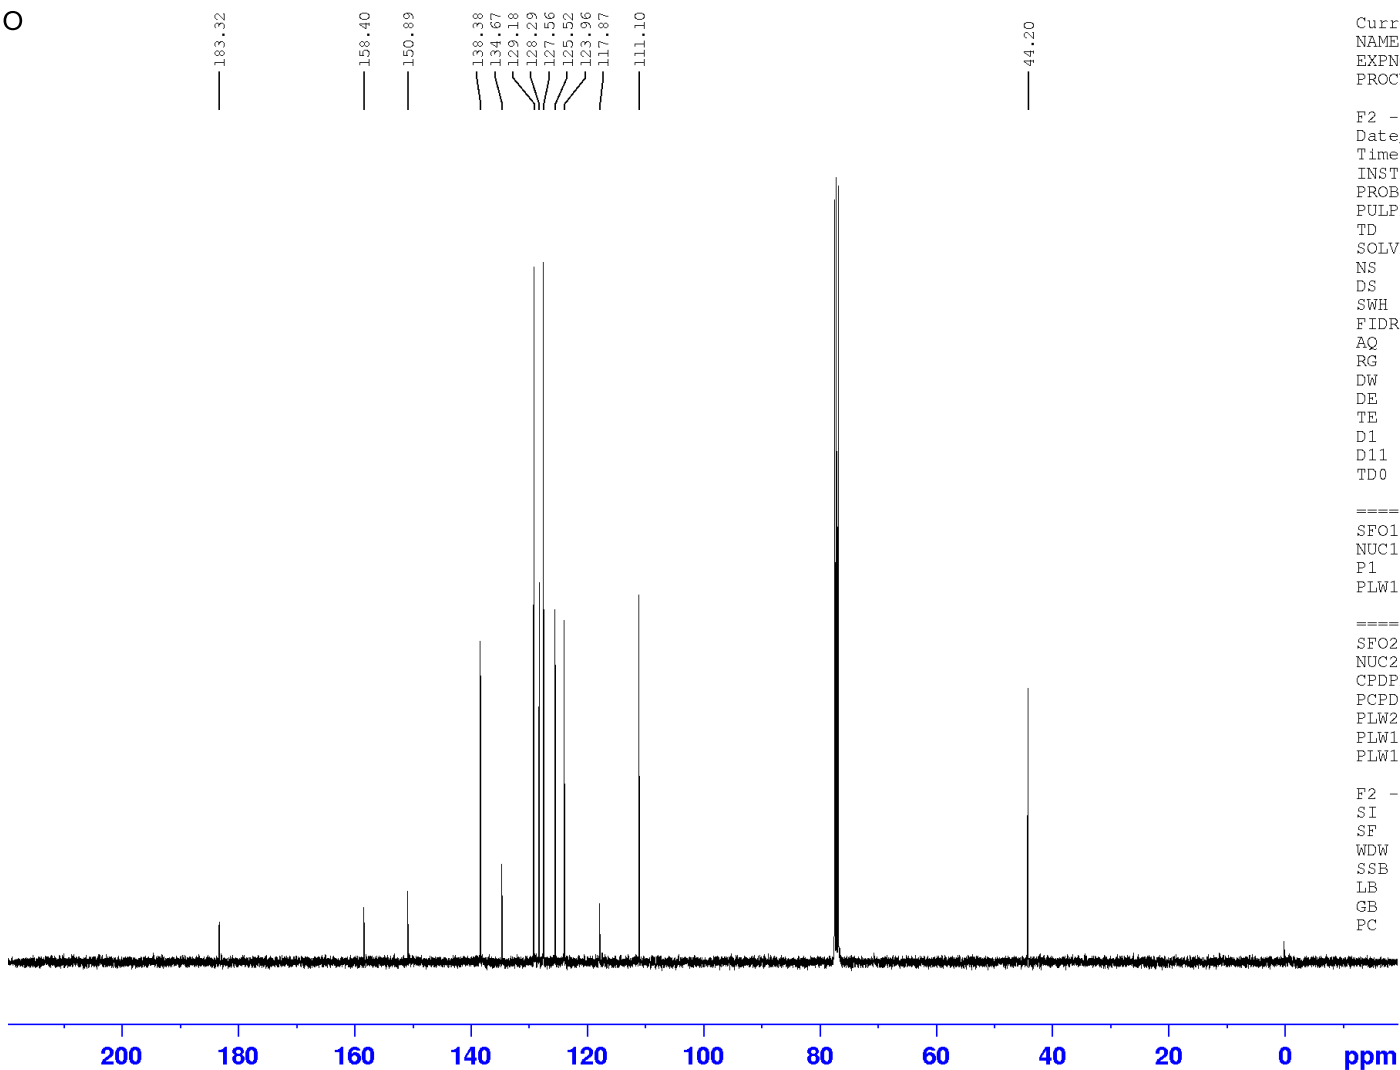

Current Data Parameters

NAME CAD-1-05  
EXPNO 11  
PROCNO 1

F2 - Acquisition Parameters

Date\_ 20191018  
Time 20.27  
INSTRUM AVIII\_400  
PROBHD 5 mm PABBO BB/  
PULPROG zgpg30  
TD 96150  
SOLVENT CDC13  
NS 1024  
DS 4  
SWH 24038.461 Hz  
FIDRES 0.250010 Hz  
AQ 1.9999200 sec  
RG 144  
DW 20.800 usec  
DE 6.50 usec  
TE 302.9 K  
D1 1.00000000 sec  
D11 0.03000000 sec  
TD0 1

===== CHANNEL f1 =====

SFO1 100.5675047 MHz  
NUC1 13C  
P1 9.00 usec  
PLW1 96.68000031 W

===== CHANNEL f2 =====

SFO2 399.9115996 MHz  
NUC2 1H  
CPDPRG[2] waltz64  
PCPD2 90.00 usec  
PLW2 17.29199982 W  
PLW12 0.48032999 W  
PLW13 0.38907000 W

F2 - Processing parameters

SI 131072  
SF 100.5574367 MHz  
WDW EM  
SSB 0  
LB 1.00 Hz  
GB 0  
PC 1.40

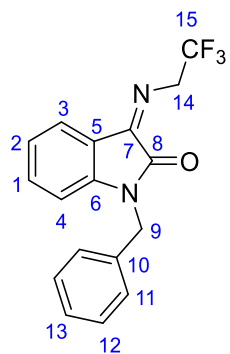

1a

<sup>1</sup>H NMR

400 MHz

CDCl<sub>3</sub>

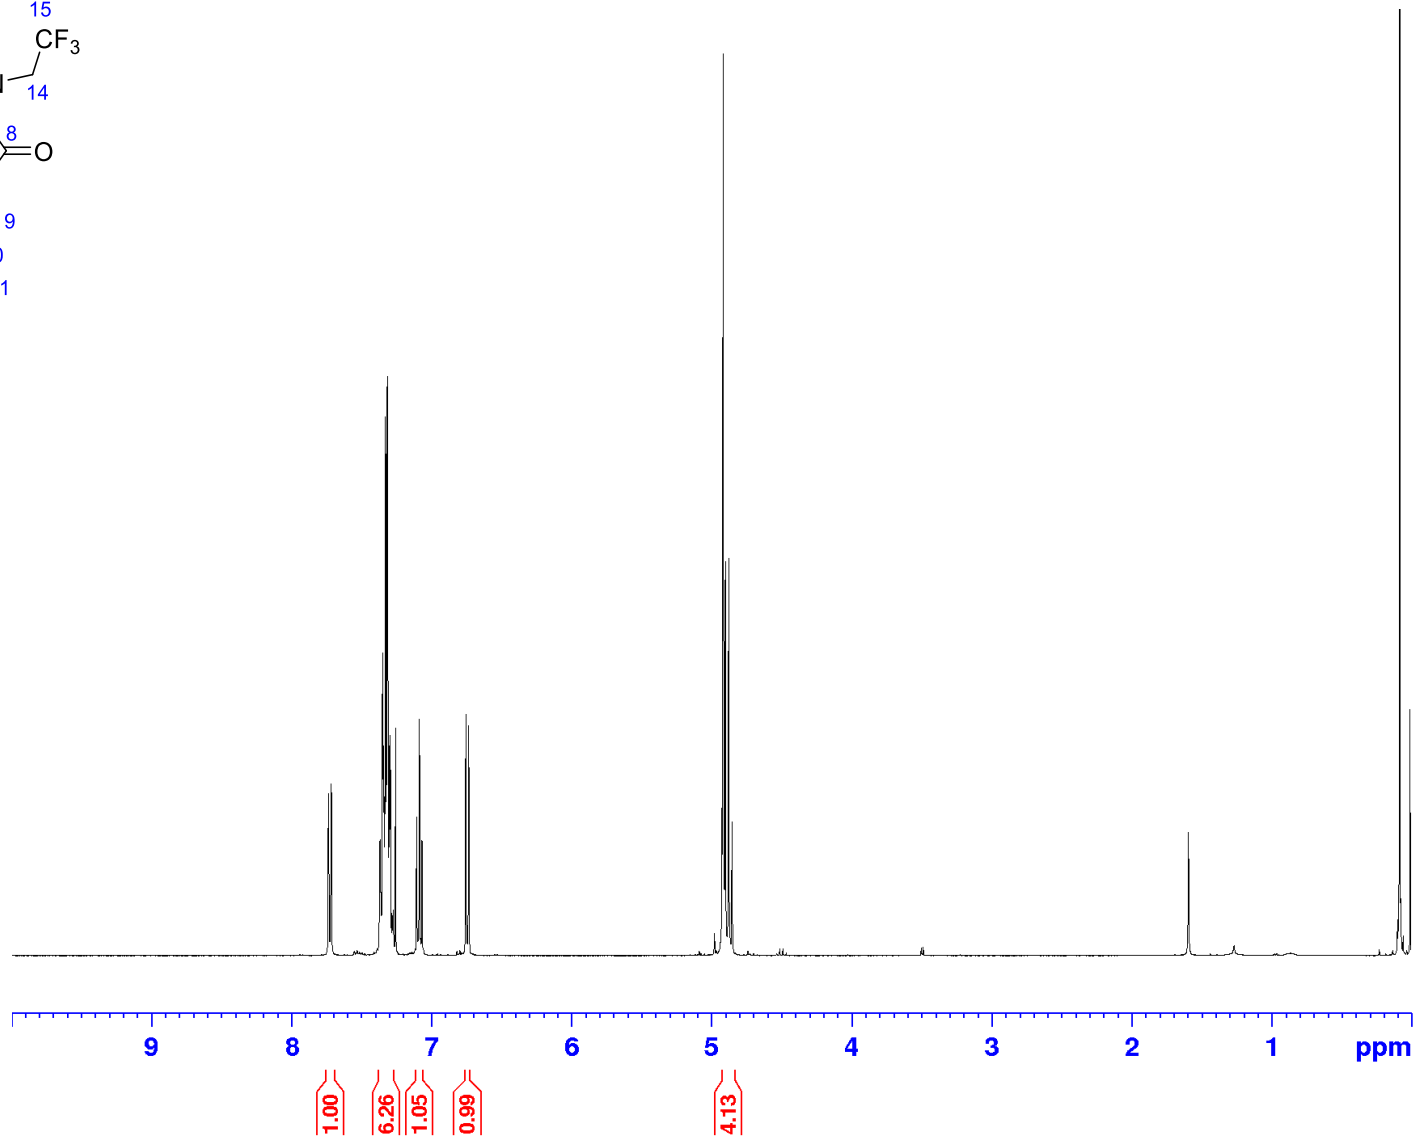

```

Current Data Parameters
NAME          CAD-1-36
EXPNO         10
PROCNO        1

F2 - Acquisition Parameters
Date_         20200214
Time          16.43 h
INSTRUM       AVIII_400
PROBHD        Z108618_0146 (
PULPROG       zg30
TD            65536
SOLVENT       CDCl3
NS            16
DS            2
SWH           8223.685 Hz
FIDRES        0.250967 Hz
AQ            3.9845889 sec
RG            144
DW            60.800 usec
DE            17.42 usec
TE            300.0 K
D1            1.00000000 sec
TD0           1
SFO1          400.1124708 MHz
NUC1          1H
P0            5.00 usec
P1            15.00 usec
PLW1          17.29199982 W

F2 - Processing parameters
SI            32768
SF            400.1100093 MHz
WDW           EM
SSB           0
LB            0.30 Hz
GB            0
PC            1.00
  
```

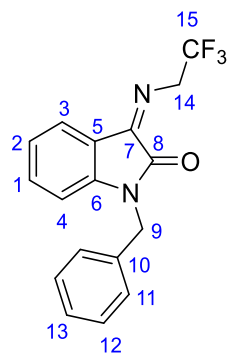

1a

<sup>13</sup>C NMR

101 MHz

CDCl<sub>3</sub>

158.74  
155.71  
145.64  
135.08  
133.85  
129.12  
128.16  
127.49  
125.18  
123.62  
123.24  
120.86  
109.89

53.78  
43.76

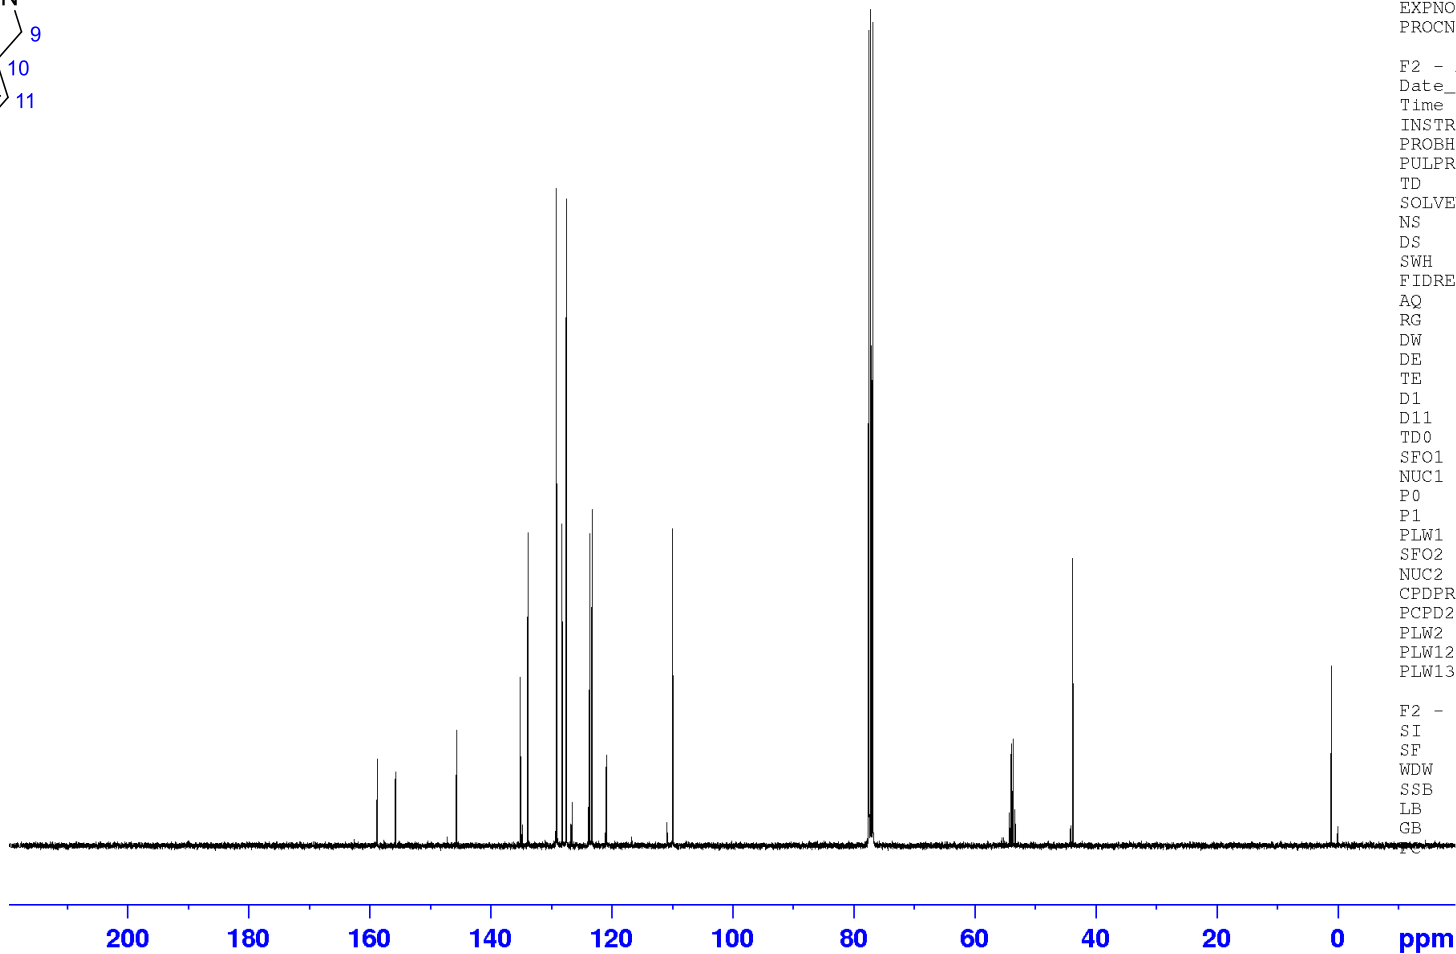

Current Data Parameters  
NAME CAD-1-36  
EXPNO 13  
PROCNO 1

F2 - Acquisition Parameters  
Date\_ 20200214  
Time 20.49 h  
INSTRUM AVIII\_400  
PROBHD Z108618\_0146 (   
PULPROG zgpg30  
TD 96150  
SOLVENT CDC13  
NS 2048  
DS 4  
SWH 24038.461 Hz  
FIDRES 0.500020 Hz  
AQ 1.9999200 sec  
RG 1030  
DW 20.800 usec  
DE 6.50 usec  
TE 300.0 K  
D1 1.00000000 sec  
D11 0.03000000 sec  
TD0 1  
SFO1 100.6178003 MHz  
NUC1 13C  
P0 3.00 usec  
P1 9.00 usec  
PLW1 96.68000031 W  
SFO2 400.1116004 MHz  
NUC2 1H  
CPDPRG[2] waltz64  
PCPD2 90.00 usec  
PLW2 17.29199982 W  
PLW12 0.48032999 W  
PLW13 0.24160001 W

F2 - Processing parameters  
SI 131072  
SF 100.6077268 MHz  
WDW EM  
SSB 0  
LB 1.00 Hz  
GB 0  
PC 1.40

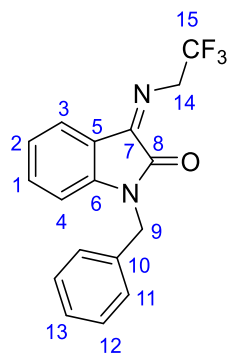

1a

<sup>19</sup>F NMR

376 MHz

CDCl<sub>3</sub>

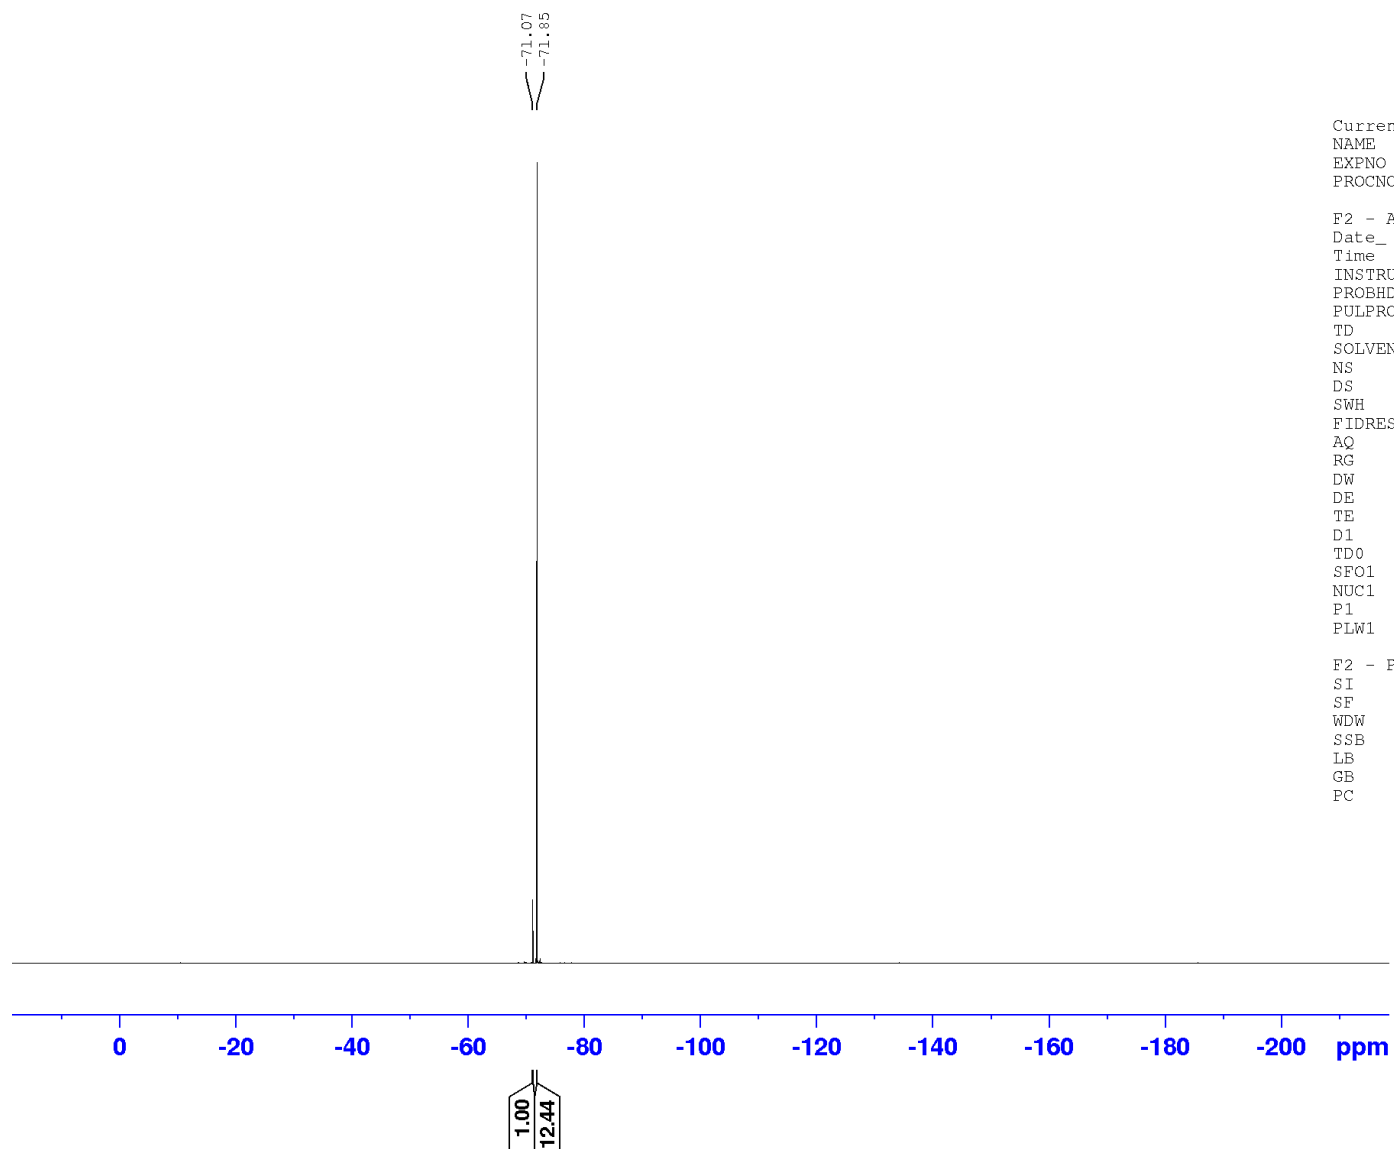

Current Data Parameters  
 NAME CAD-1-36  
 EXPNO 15  
 PROCNO 1

F2 - Acquisition Parameters  
 Date\_ 20200214  
 Time 21.08 h  
 INSTRUM AVIII\_400  
 PROBHD Z108618\_0146 (  
 PULPROG zg  
 TD 261992  
 SOLVENT CDCl3  
 NS 16  
 DS 4  
 SWH 89285.711 Hz  
 FIDRES 0.681591 Hz  
 AQ 1.4671552 sec  
 RG 724  
 DW 5.600 usec  
 DE 7.11 usec  
 TE 300.0 K  
 D1 1.00000000 sec  
 TD0 1  
 SFO1 376.4418995 MHz  
 NUC1 19F  
 P1 11.80 usec  
 PLW1 32.96500015 W

F2 - Processing parameters  
 SI 262144  
 SF 376.4795470 MHz  
 WDW EM  
 SSB 0  
 LB 0.30 Hz  
 GB 0  
 PC 1.00

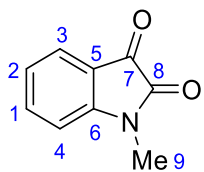

S2

<sup>1</sup>H NMR

400 MHz

CDCl<sub>3</sub>

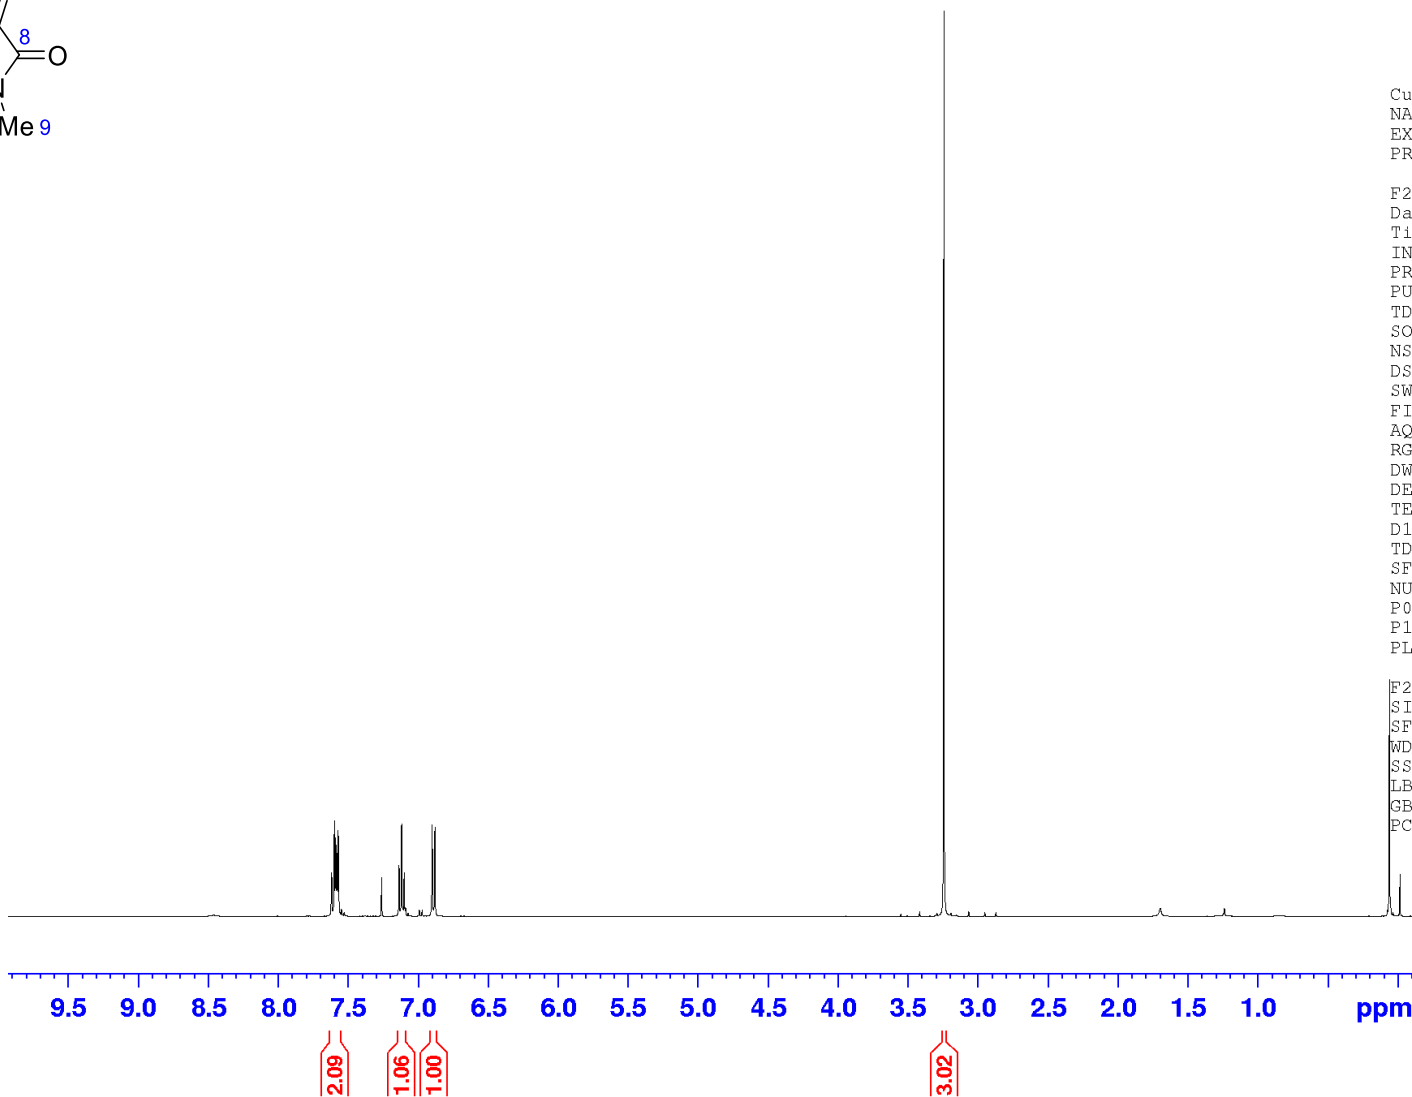

Current Data Parameters  
NAME CAD-1-38  
EXPNO 10  
PROCNO 1

F2 - Acquisition Parameters  
Date\_ 20200214  
Time 17.02 h  
INSTRUM AVIII\_400  
PROBHD Z108618\_0146 (  
PULPROG zg30  
TD 65536  
SOLVENT CDCl3  
NS 16  
DS 2  
SWH 8223.685 Hz  
FIDRES 0.250967 Hz  
AQ 3.9845889 sec  
RG 144  
DW 60.800 usec  
DE 17.42 usec  
TE 300.0 K  
D1 1.00000000 sec  
TD0 1  
SFO1 400.1124708 MHz  
NUC1 1H  
P0 5.00 usec  
P1 15.00 usec  
PLW1 17.29199982 W

F2 - Processing parameters  
SI 32768  
SF 400.1100092 MHz  
WDW EM  
SSB 0  
LB 0.30 Hz  
GB 0  
PC 1.00

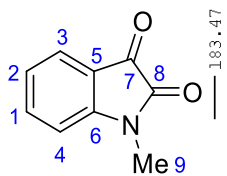

S2

<sup>13</sup>C NMR

101 MHz

CDCl<sub>3</sub>

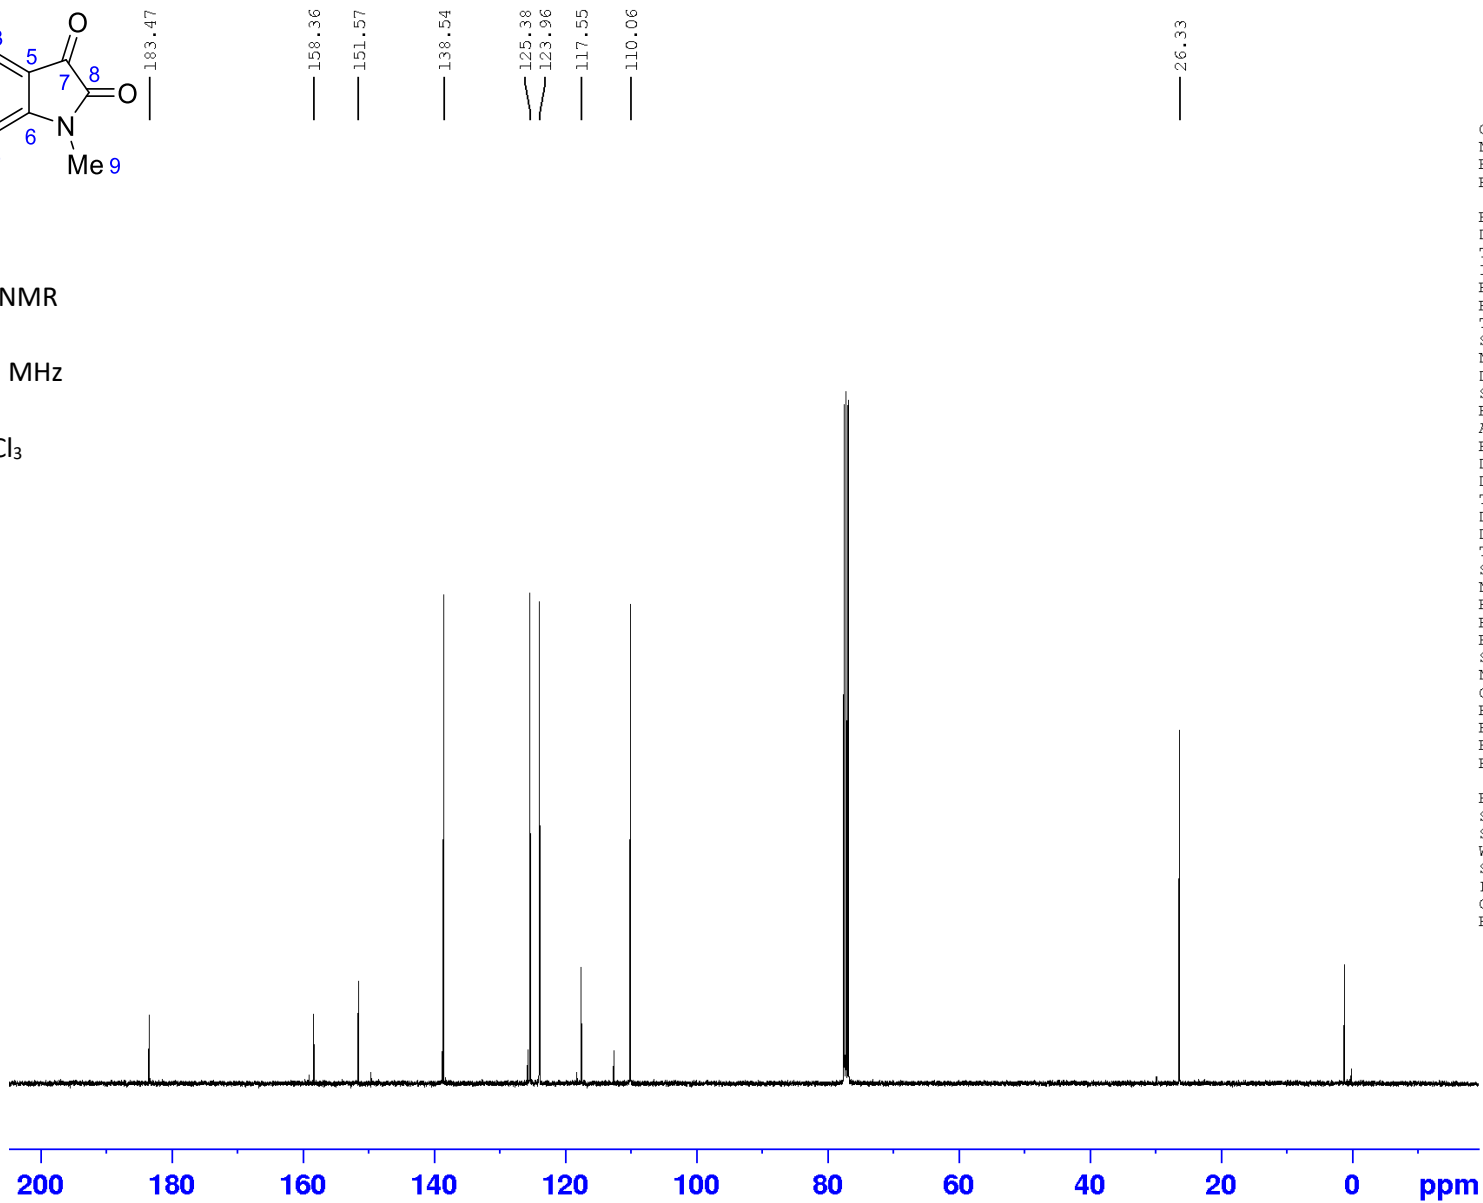

Current Data Parameters  
 NAME CAD-1-38  
 EXPNO 13  
 PROCNO 1

F2 - Acquisition Parameters  
 Date\_ 20200214  
 Time 22.57 h  
 INSTRUM AVIII\_400  
 PROBHD Z108618\_0146 (  
 PULPROG zgpg30  
 TD 96150  
 SOLVENT CDCl3  
 NS 2048  
 DS 4  
 SWH 24038.461 Hz  
 FIDRES 0.500020 Hz  
 AQ 1.9999200 sec  
 RG 2050  
 DW 20.800 usec  
 DE 6.50 usec  
 TE 300.0 K  
 D1 1.0000000 sec  
 D11 0.0300000 sec  
 TD0 1  
 SFO1 100.6178003 MHz  
 NUC1 13C  
 P0 3.00 usec  
 P1 9.00 usec  
 PLW1 96.68000031 W  
 SFO2 400.1116004 MHz  
 NUC2 1H  
 CPDPRG[2] waltz64  
 PCPD2 90.00 usec  
 PLW2 17.29199982 W  
 PLW12 0.48032999 W  
 PLW13 0.24160001 W

F2 - Processing parameters  
 SI 131072  
 SF 100.6077299 MHz  
 WDW EM  
 SSB 0  
 LB 1.00 Hz  
 GB 0  
 PC 1.40

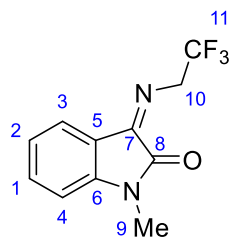

1b

<sup>1</sup>H NMR

400 MHz

CDCl<sub>3</sub>

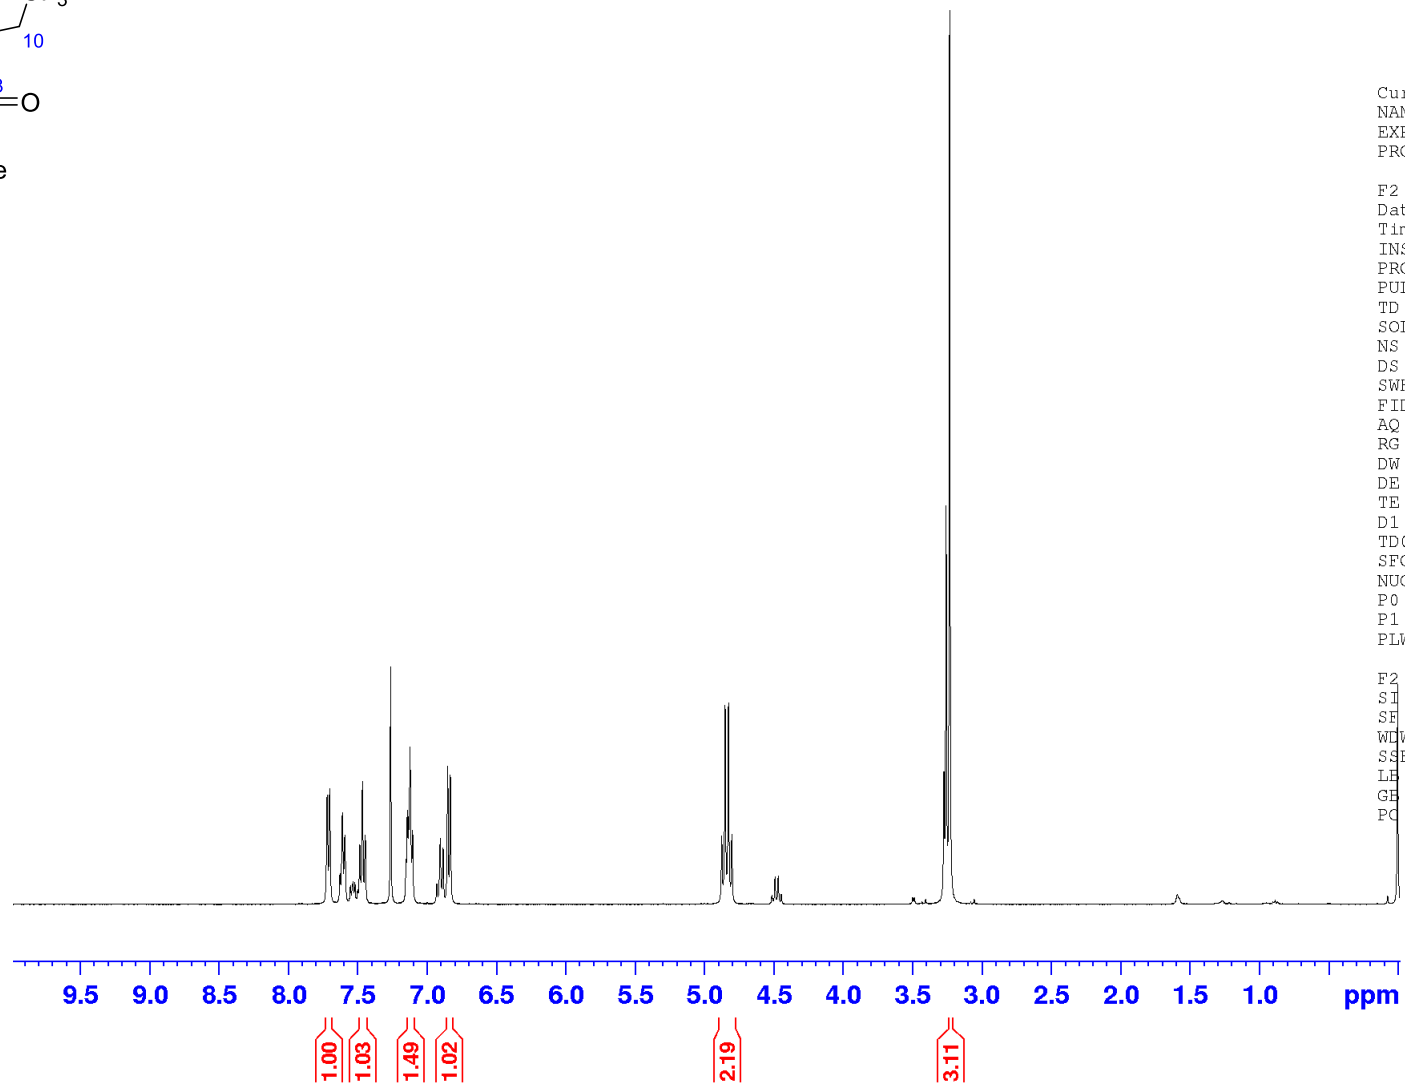

Current Data Parameters  
 NAME WR 2.163 Crop 1  
 EXPNO 10  
 PROCNO 1

F2 - Acquisition Parameters  
 Date\_ 20210510  
 Time 16.39 h  
 INSTRUM AVIII\_400  
 PROBHD Z108618\_0146 (  
 PULPROG zg30  
 TD 65536  
 SOLVENT CDCl3  
 NS 16  
 DS 2  
 SWH 8223.685 Hz  
 FIDRES 0.250967 Hz  
 AQ 3.9845889 sec  
 RG 256  
 DW 60.800 usec  
 DE 17.42 usec  
 TE 300.0 K  
 D1 1.00000000 sec  
 TD0 1  
 SFO1 400.1124708 MHz  
 NUC1 1H  
 P0 5.00 usec  
 P1 15.00 usec  
 PLW1 17.29199982 W

F2 - Processing parameters  
 SI 32768  
 SF 400.1100085 MHz  
 WDW EM  
 SSB 0  
 LB 0.30 Hz  
 GB 0  
 PC 1.00



1b

<sup>13</sup>C NMR

101 MHz

CDCl<sub>3</sub>

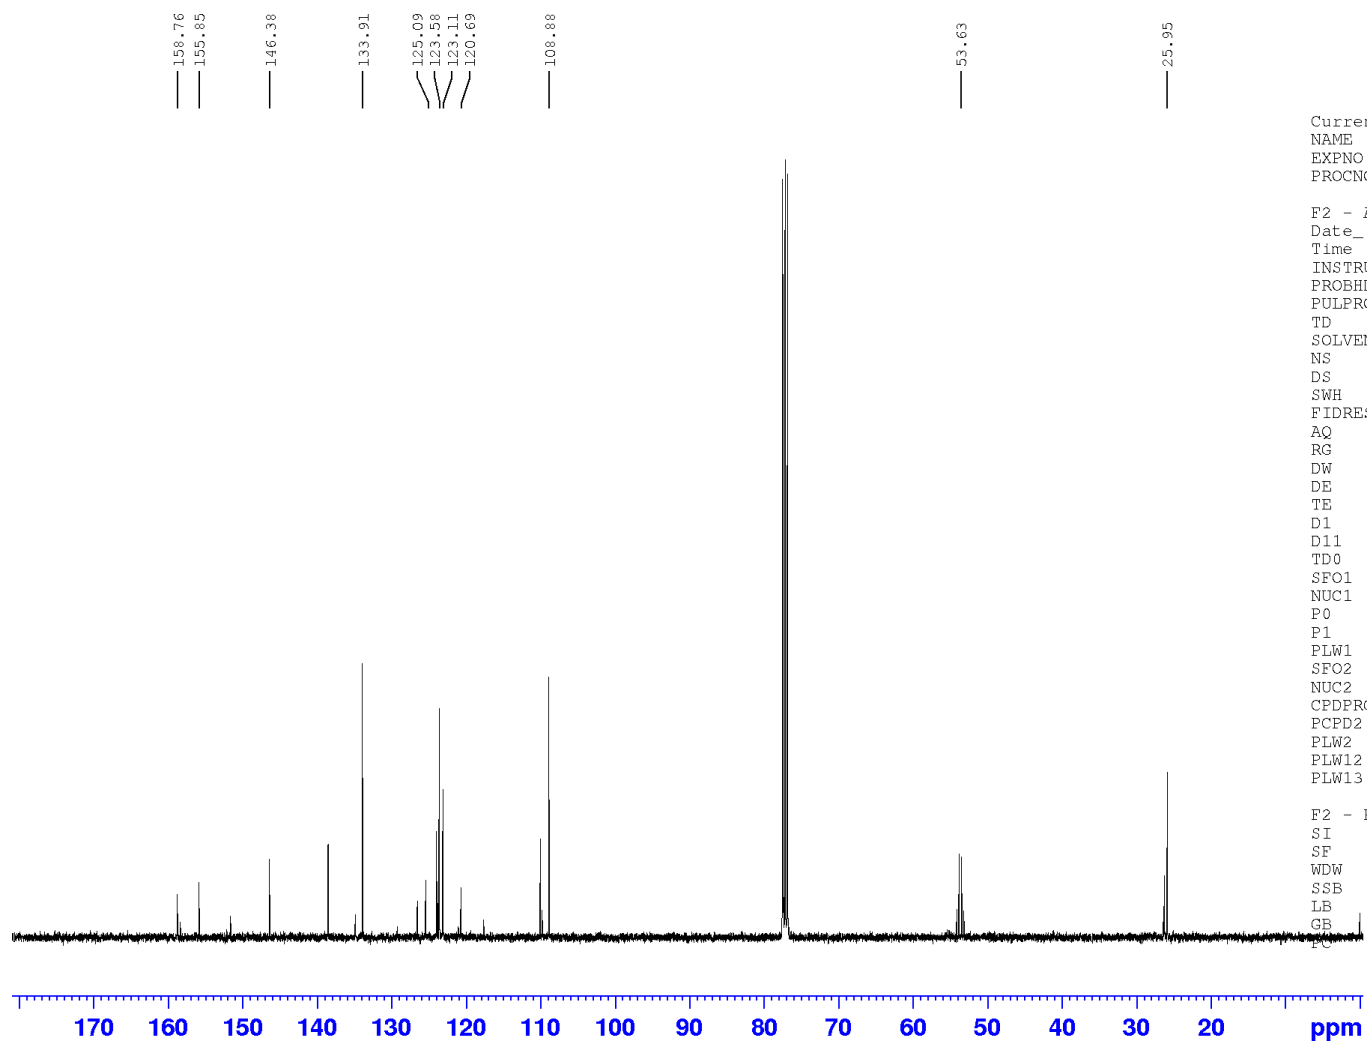

Current Data Parameters  
 NAME WR 2.163 Crop 1  
 EXPNO 20  
 PROCNO 1

F2 - Acquisition Parameters  
 Date\_ 20210510  
 Time 20.53 h  
 INSTRUM AVIII\_400  
 PROBHD Z108618\_0146 (  
 PULPROG zgpg30  
 TD 96150  
 SOLVENT CDCl3  
 NS 1024  
 DS 4  
 SWH 24038.461 Hz  
 FIDRES 0.500020 Hz  
 AQ 1.9999200 sec  
 RG 2050  
 DW 20.800 usec  
 DE 6.50 usec  
 TE 300.0 K  
 D1 1.00000000 sec  
 D11 0.03000000 sec  
 TD0 1  
 SFO1 100.6178003 MHz  
 NUC1 13C  
 P0 3.00 usec  
 P1 9.00 usec  
 PLW1 96.68000031 W  
 SFO2 400.1116004 MHz  
 NUC2 1H  
 CPDPRG[2] waltz64  
 PCPD2 90.00 usec  
 PLW2 17.29199982 W  
 PLW12 0.48032999 W  
 PLW13 0.24160001 W

F2 - Processing parameters  
 SI 131072  
 SF 100.6077266 MHz  
 WDW EM  
 SSB 0  
 LB 1.00 Hz  
 GB 0  
 PC 1.40



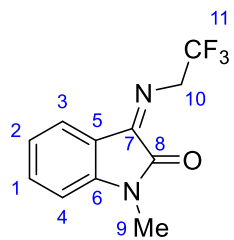

1b

<sup>19</sup>F NMR

376 MHz

CDCl<sub>3</sub>

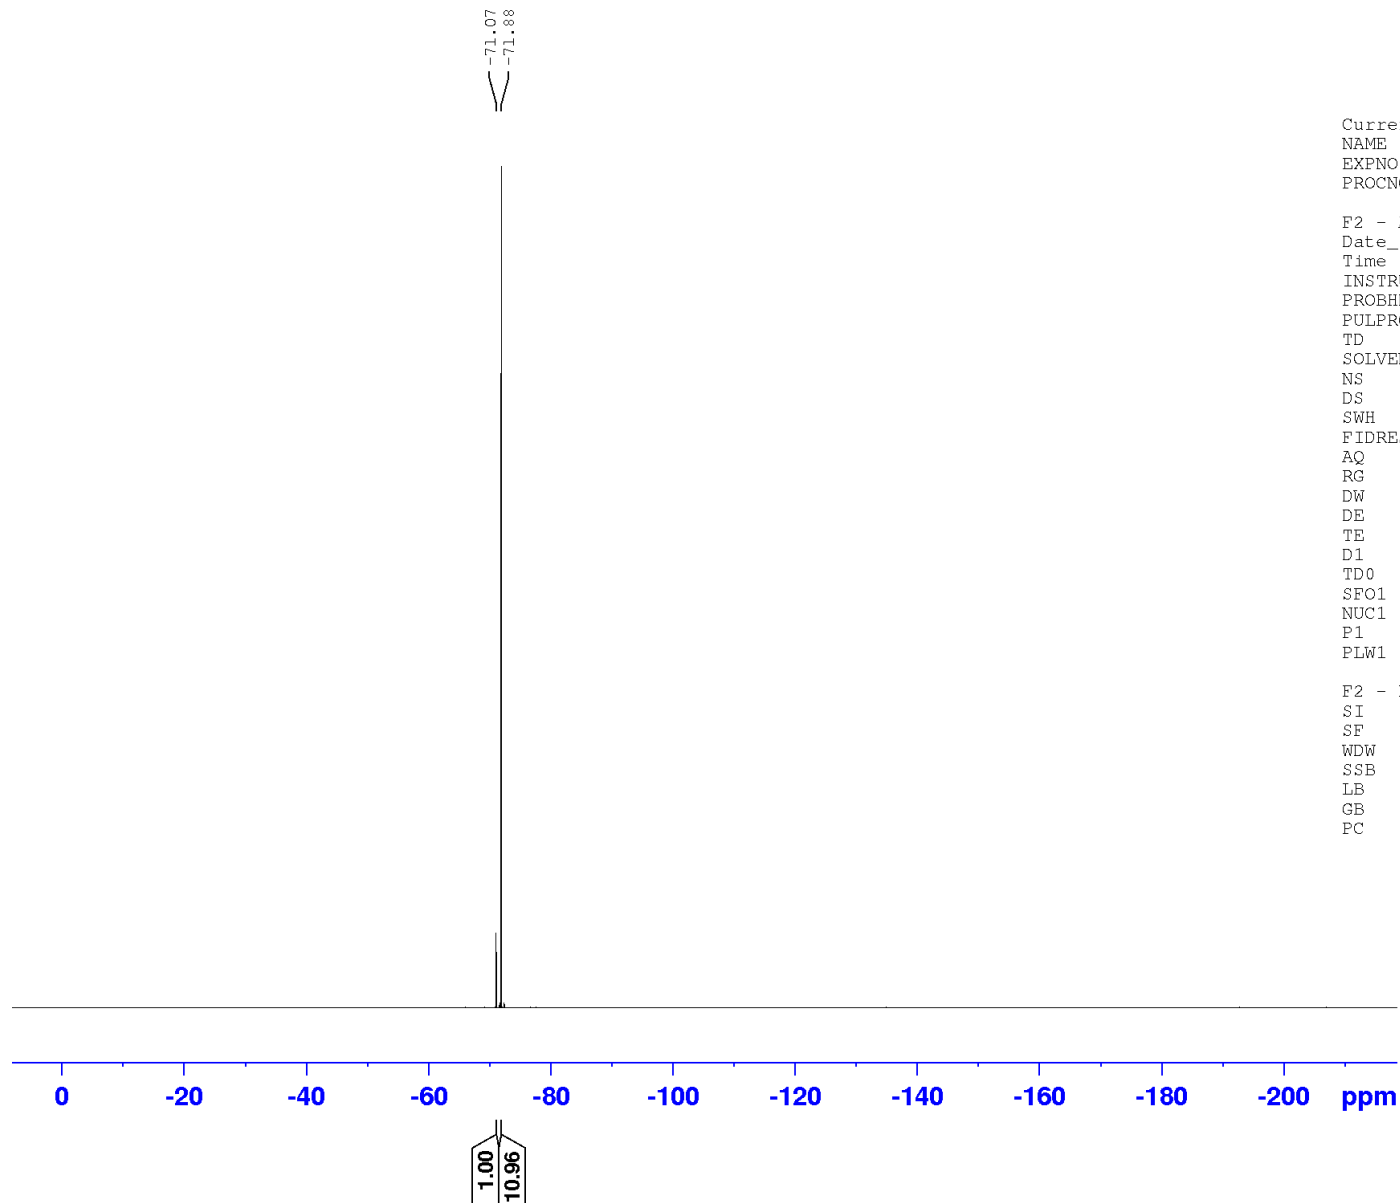

Current Data Parameters  
 NAME WR 2.163 Crop 1  
 EXPNO 25  
 PROCNO 1

F2 - Acquisition Paramet  
 Date\_ 20210510  
 Time 21.52  
 INSTRUM AVIII\_400  
 PROBHD Z108618\_0146 {  
 PULPROG zg  
 TD 261992  
 SOLVENT CDC13  
 NS 16  
 DS 4  
 SWH 89285.711  
 FIDRES 0.681591  
 AQ 1.4671552  
 RG 724  
 DW 5.600  
 DE 7.11  
 TE 300.0  
 D1 1.00000000  
 TD0 1  
 SFO1 376.4418995  
 NUC1 19F  
 P1 11.80  
 PLW1 32.96500015

F2 - Processing paramete  
 SI 262144  
 SF 376.4795470  
 WDW EM  
 SSB 0  
 LB 0.30  
 GB 0  
 PC 1.00

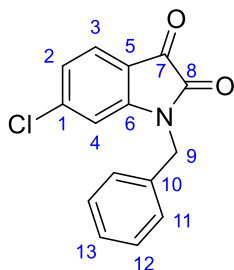

S3

<sup>1</sup>H NMR

400 MHz

CDCl<sub>3</sub>

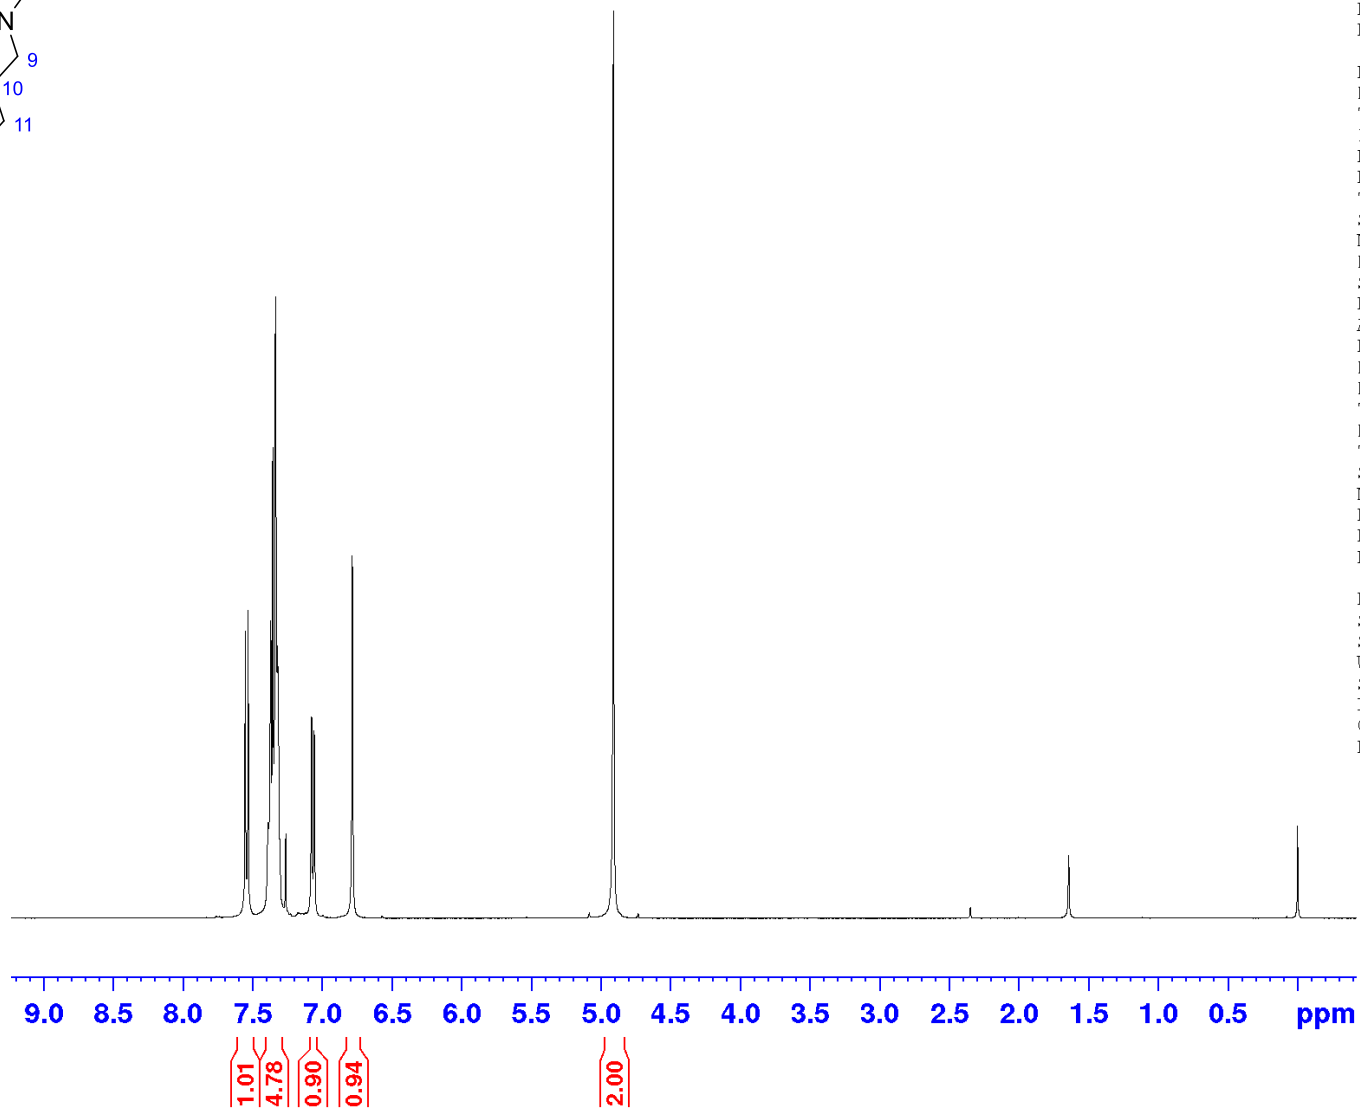

Current Data Parameters  
 NAME WR 2.220 C1  
 EXPNO 10  
 PROCNO 1

F2 - Acquisition Parameters  
 Date\_ 20210923  
 Time 17.37 h  
 INSTRUM AVIII\_400  
 PROBHD Z108618\_0146 ( )  
 PULPROG zg30  
 TD 65536  
 SOLVENT CDCl3  
 NS 16  
 DS 2  
 SWH 8223.685 Hz  
 FIDRES 0.250967 Hz  
 AQ 3.9845889 sec  
 RG 128  
 DW 60.800 usec  
 DE 17.42 usec  
 TE 300.0 K  
 D1 1.00000000 sec  
 TD0 1  
 SFO1 400.1124708 MHz  
 NUC1 1H  
 P0 5.00 usec  
 P1 15.00 usec  
 PLW1 17.29199982 W

F2 - Processing parameters  
 SI 32768  
 SF 400.1100083 MHz  
 WDW EM  
 SSB 0  
 LB 0.30 Hz  
 GB 0  
 PC 1.00

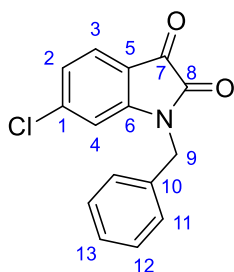

S3

<sup>13</sup>C NMR

101 MHz

CDCl<sub>3</sub>

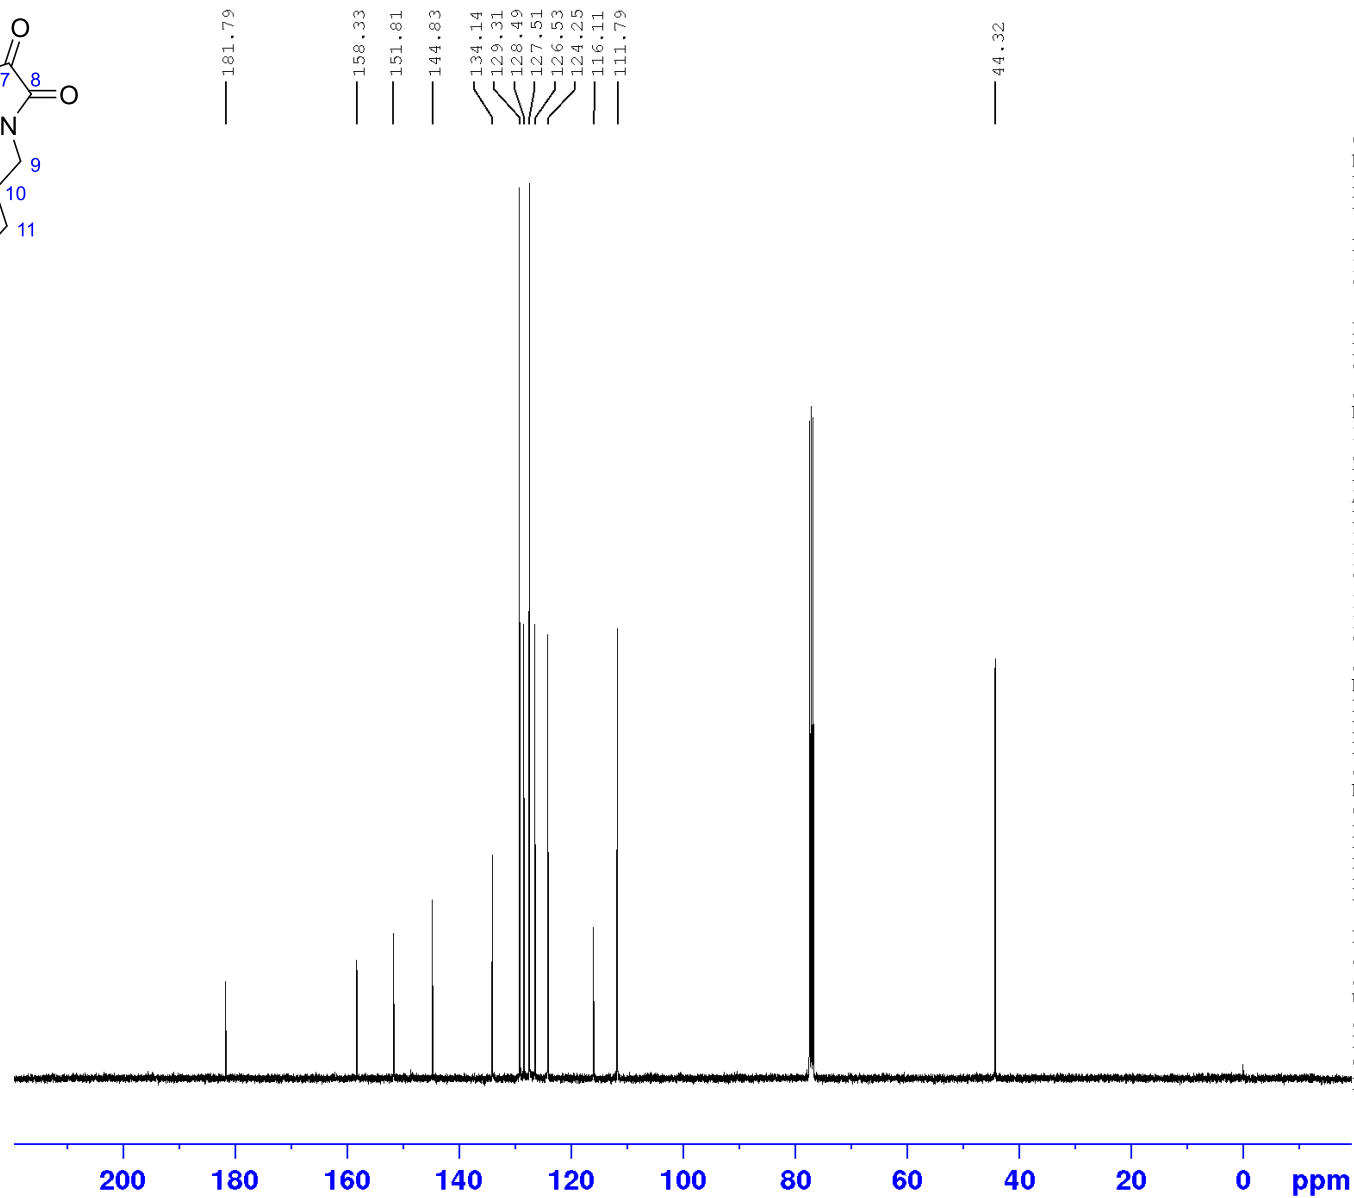

Current Data Parameters  
 NAME WR 2.220 C1  
 EXPNO 11  
 PROCNO 1

F2 - Acquisition Parameters  
 Date\_ 20210923  
 Time 18.31 h  
 INSTRUM AVIII\_400  
 PROBHD Z108618\_0146 (  
 PULPROG zgpg30  
 TD 96150  
 SOLVENT CDCl3  
 NS 1024  
 DS 4  
 SWH 24038.461 Hz  
 FIDRES 0.500020 Hz  
 AQ 1.9999200 sec  
 RG 2050  
 DW 20.800 usec  
 DE 6.50 usec  
 TE 300.0 K  
 D1 1.00000000 sec  
 D11 0.03000000 sec  
 TD0 1  
 SFO1 100.6178003 MHz  
 NUC1 13C  
 P0 3.00 usec  
 P1 9.00 usec  
 PLW1 96.68000031 W  
 SFO2 400.1116004 MHz  
 NUC2 1H  
 CPDPRG[2] waltz64  
 PCPD2 90.00 usec  
 PLW2 17.29199982 W  
 PLW12 0.48032999 W  
 PLW13 0.24160001 W

F2 - Processing parameters  
 SI 131072  
 SF 100.6077301 MHz  
 WDW EM  
 SSB 0  
 LB 1.00 Hz  
 GB 0  
 PC 1.40

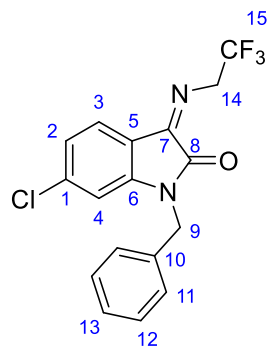

1c

<sup>1</sup>H NMR

400 MHz

CDCl<sub>3</sub>

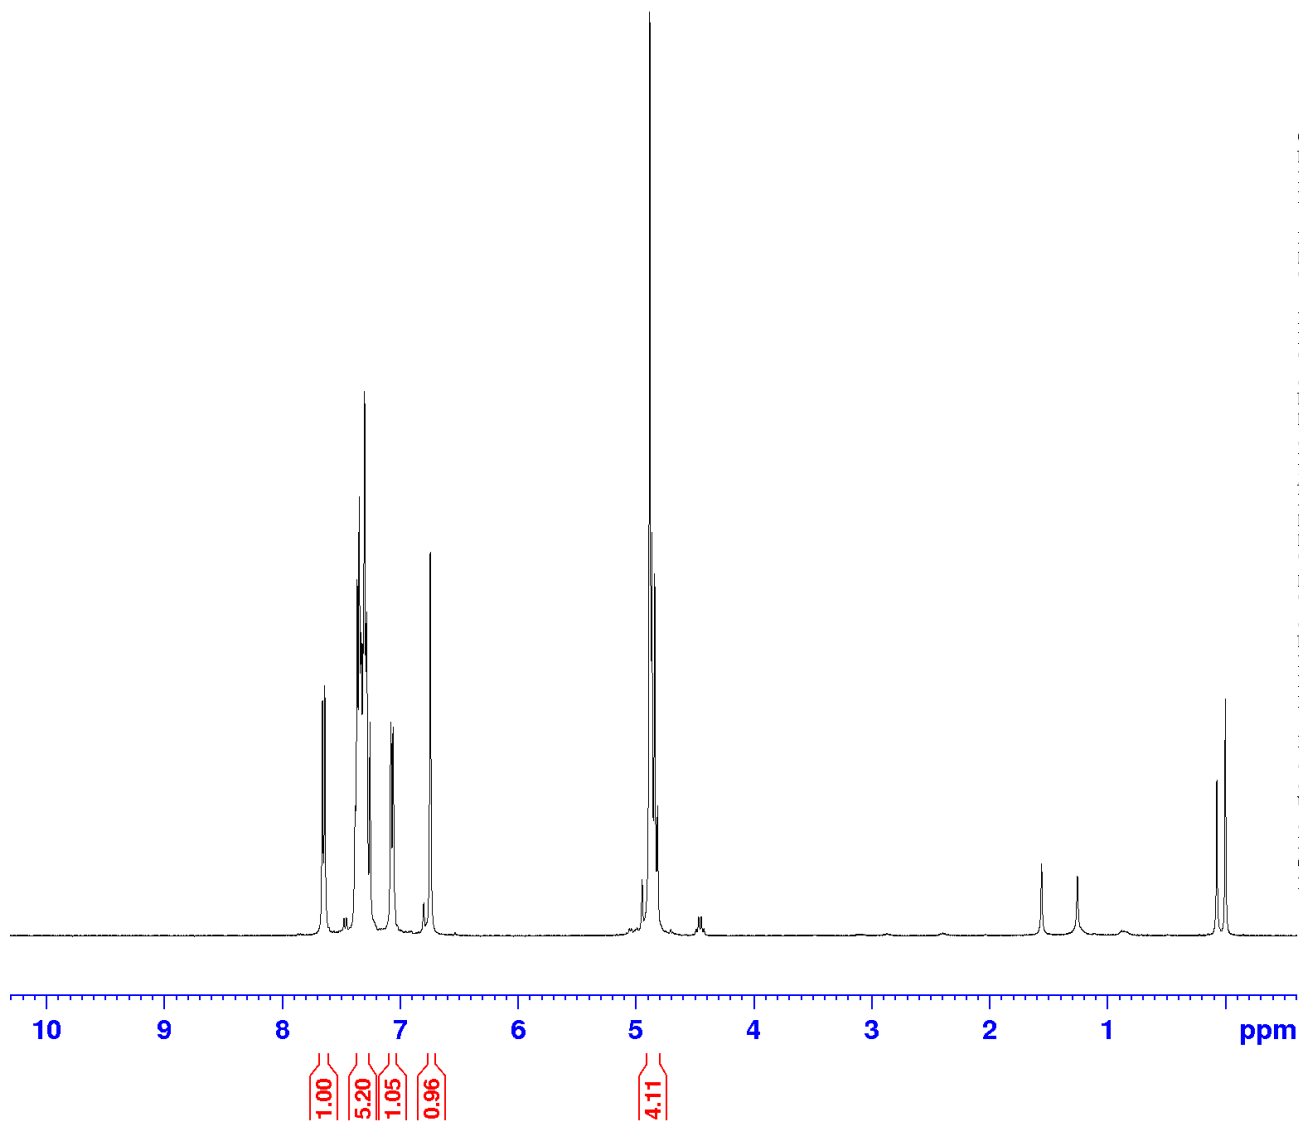

Current Data Parameters  
 NAME WR 2.223  
 EXPNO 20  
 PROCNO 1

F2 - Acquisition Parameters  
 Date\_ 20211014  
 Time 14.52 h  
 INSTRUM AVIII\_400  
 PROBHD Z108618\_0146 (  
 PULPROG zg30  
 TD 65536  
 SOLVENT CDC13  
 NS 16  
 DS 2  
 SWH 8223.685 Hz  
 FIDRES 0.250967 Hz  
 AQ 3.9845889 sec  
 RG 256  
 DW 60.800 usec  
 DE 17.42 usec  
 TE 300.0 K  
 D1 1.00000000 sec  
 TDO 1  
 SFO1 400.1124708 MHz  
 NUC1 1H  
 PO 5.00 usec  
 P1 15.00 usec  
 PLW1 17.29199982 W

F2 - Processing parameters  
 SI 32768  
 SF 400.1100117 MHz  
 WDW EM  
 SSB 0  
 LB 0.30 Hz  
 GB 0  
 PC 1.00



1c

<sup>13</sup>C NMR

101 MHz

CDCl<sub>3</sub>

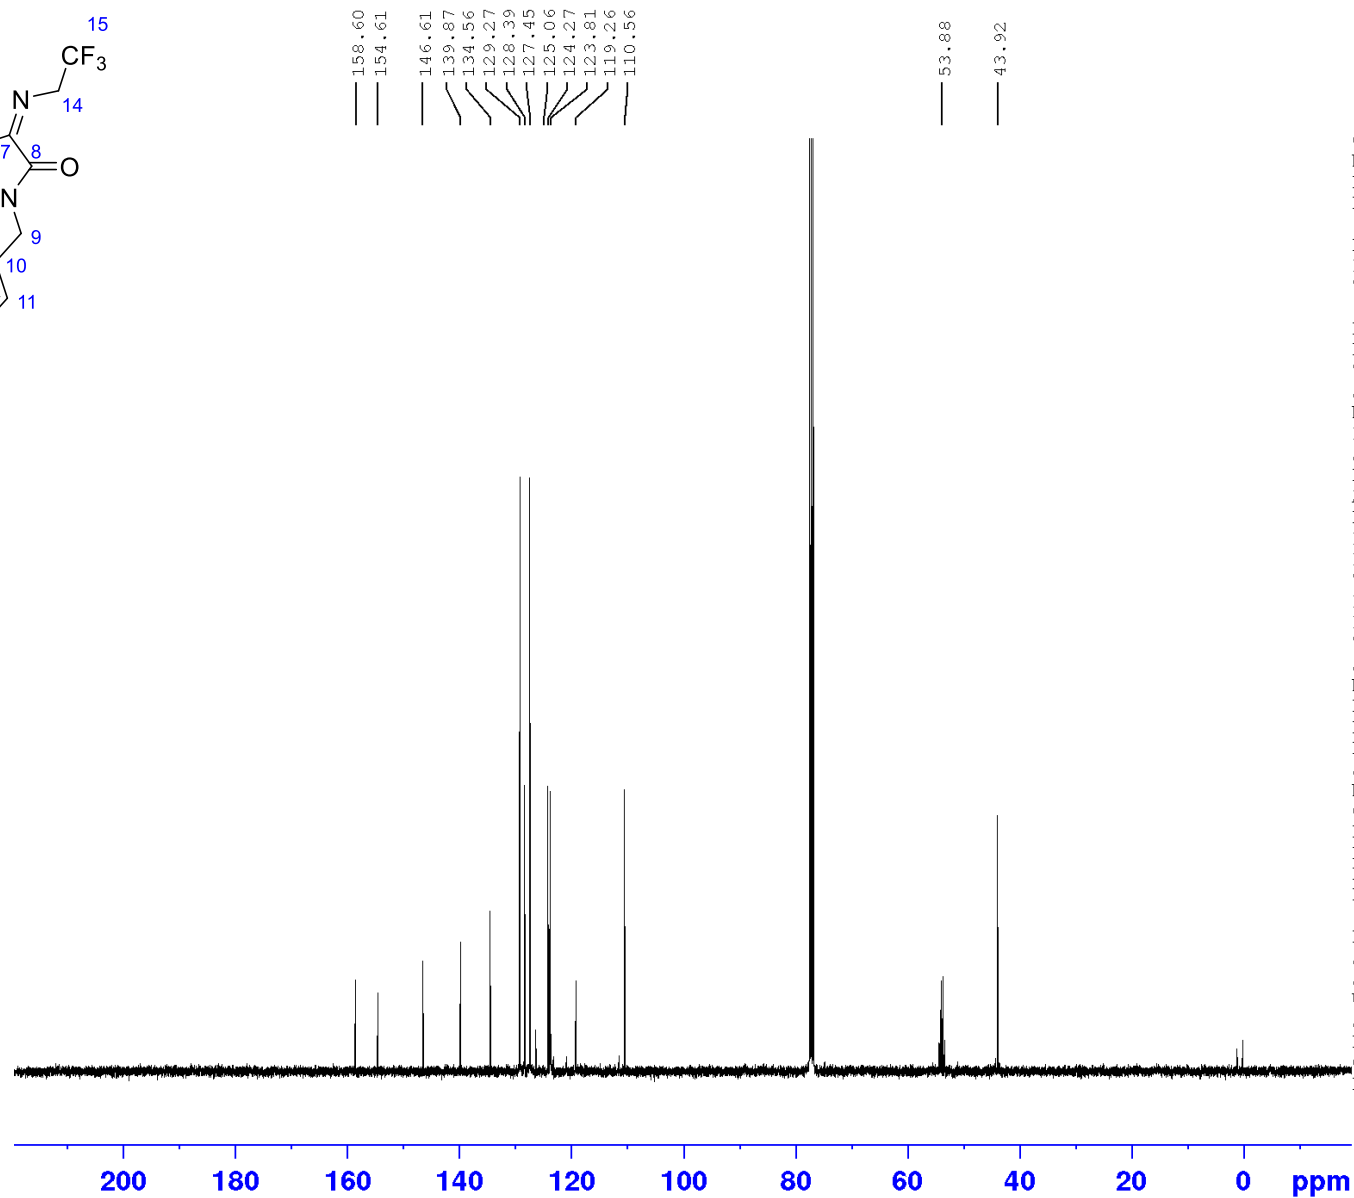

Current Data Parameters  
 NAME WR 2.223  
 EXPNO 12  
 PROCNO 1

F2 - Acquisition Parameters  
 Date\_ 20210930  
 Time 18.21 h  
 INSTRUM AVIII\_400  
 PROBHD Z108618\_0146 (  
 PULPROG zgpg30  
 TD 96150  
 SOLVENT CDCl3  
 NS 1024  
 DS 4  
 SWH 24038.461 Hz  
 FIDRES 0.500020 Hz  
 AQ 1.9999200 sec  
 RG 2050  
 DW 20.800 usec  
 DE 6.50 usec  
 TE 300.0 K  
 D1 1.00000000 sec  
 D11 0.03000000 sec  
 TD0 1  
 SFO1 100.6178003 MHz  
 NUC1 13C  
 P0 3.00 usec  
 P1 9.00 usec  
 PLW1 96.68000031 W  
 SFO2 400.1116004 MHz  
 NUC2 1H  
 CPDPRG[2] waltz64  
 PCPD2 90.00 usec  
 PLW2 17.29199982 W  
 PLW12 0.48032999 W  
 PLW13 0.24160001 W

F2 - Processing parameters  
 SI 131072  
 SF 100.6077265 MHz  
 WDW EM  
 SSB 0  
 LB 1.00 Hz  
 GB 0  
 PC 1.40



1c

<sup>19</sup>F NMR

376 MHz

CDCl<sub>3</sub>

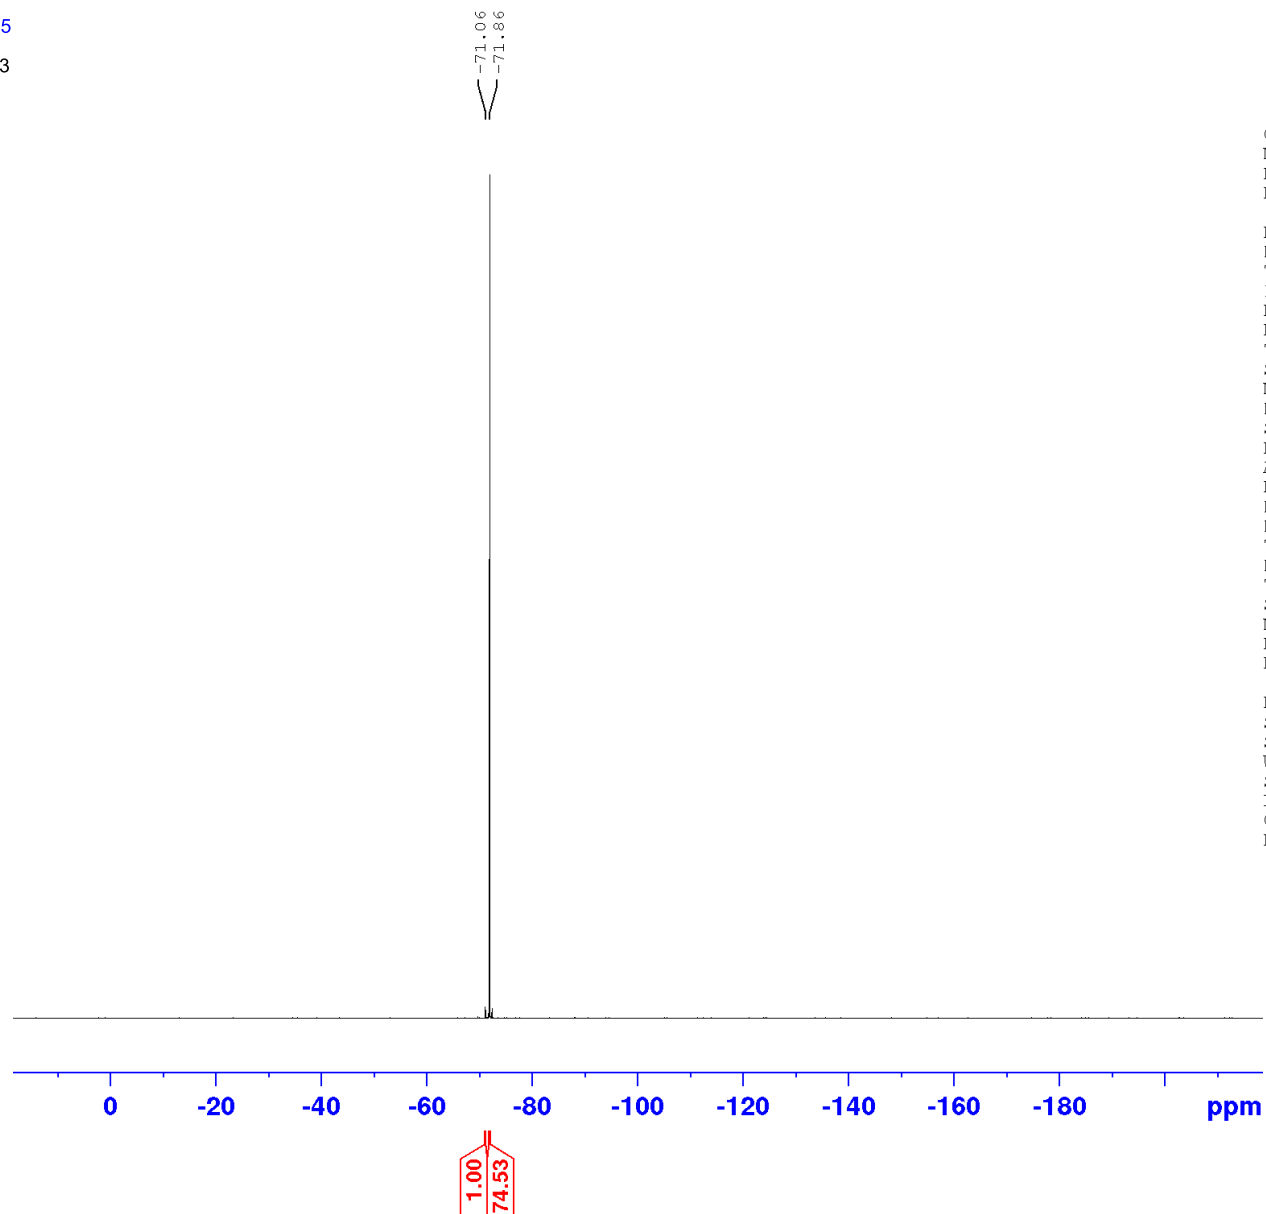

Current Data Parameters  
 NAME WR 2.223  
 EXPNO 11  
 PROCNO 1

F2 - Acquisition Parameters  
 Date\_ 20210930  
 Time 15.55 h  
 INSTRUM AVIII\_400  
 PROBHD Z108618\_0146 ( )  
 PULPROG zg  
 TD 261992  
 SOLVENT CDCl3  
 NS 16  
 DS 4  
 SWH 89285.711 Hz  
 FIDRES 0.681591 Hz  
 AQ 1.4671552 sec  
 RG 645  
 DW 5.600 usec  
 DE 7.11 usec  
 TE 300.0 K  
 D1 1.00000000 sec  
 TD0 1  
 SFO1 376.4418995 MHz  
 NUC1 19F  
 P1 11.80 usec  
 PLW1 32.96500015 W

F2 - Processing parameters  
 SI 262144  
 SF 376.4795470 MHz  
 WDW EM  
 SSB 0  
 LB 0.30 Hz  
 GB 0  
 PC 1.00

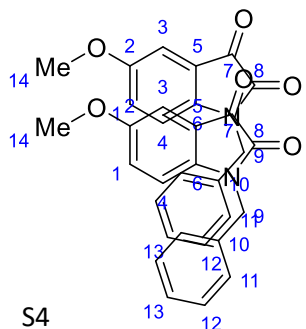

S4  
<sup>1</sup>H NMR  
<sup>13</sup>C NMR  
 400 MHz  
 101 MHz  
 CDCl<sub>3</sub>  
 CDCl<sub>3</sub>

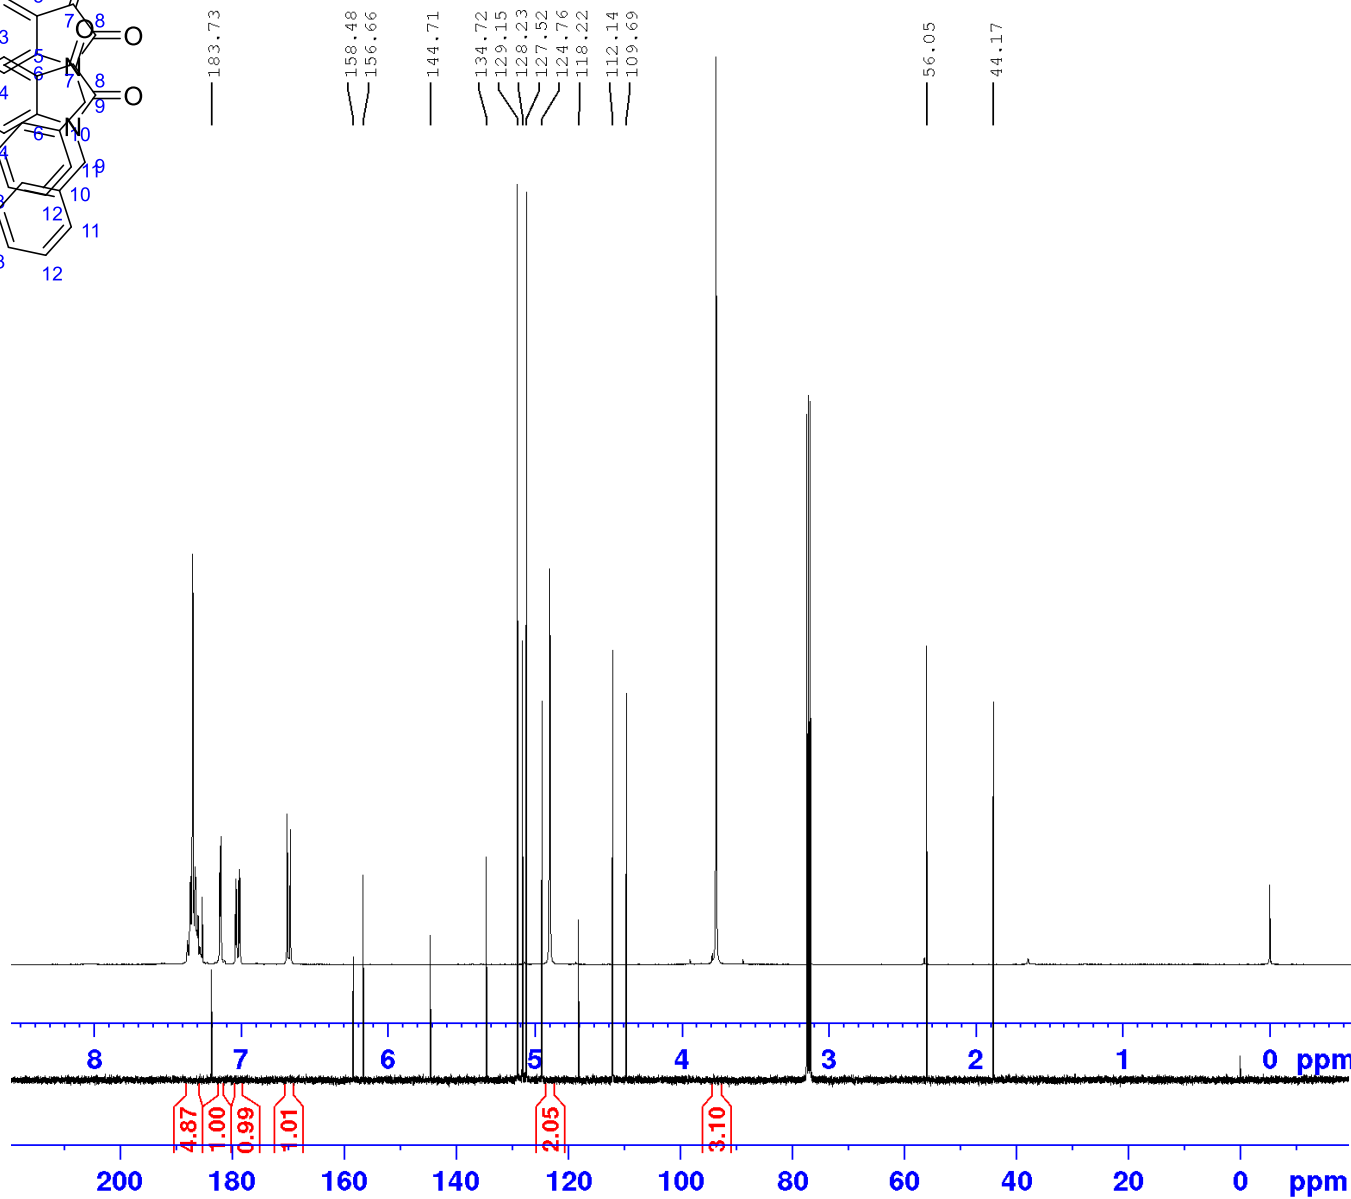

Current Data Parameters  
 NAME WR 2.229 C1  
 EXPNO 10  
 PROCNO 1

F2 - Acquisition Parameters  
 NAME WR 2.229 C1 h  
 EXPTIME 18.25 h  
 INSTRUM AVIII\_400  
 PROBRD Z108618\_01461  
 PULPROG zg30

F2 - Acquisition Parameters  
 NAME WR 2.229 C1 h  
 EXPTIME 18.25 h  
 INSTRUM AVIII\_400  
 PROBRD Z108618\_01461  
 PULPROG zg30

F2 - Processing parameters  
 SI 131072  
 SF 100.6077294 MHz  
 WDW EM  
 SSB 0  
 LB 1.00 Hz  
 GB 0  
 PC 1.40

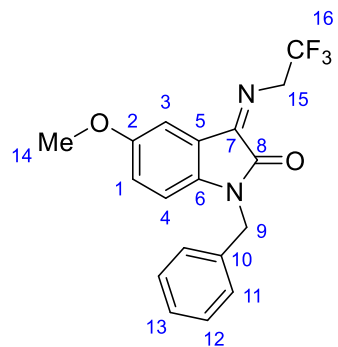

1d

<sup>1</sup>H NMR

400 MHz

CDCl<sub>3</sub>

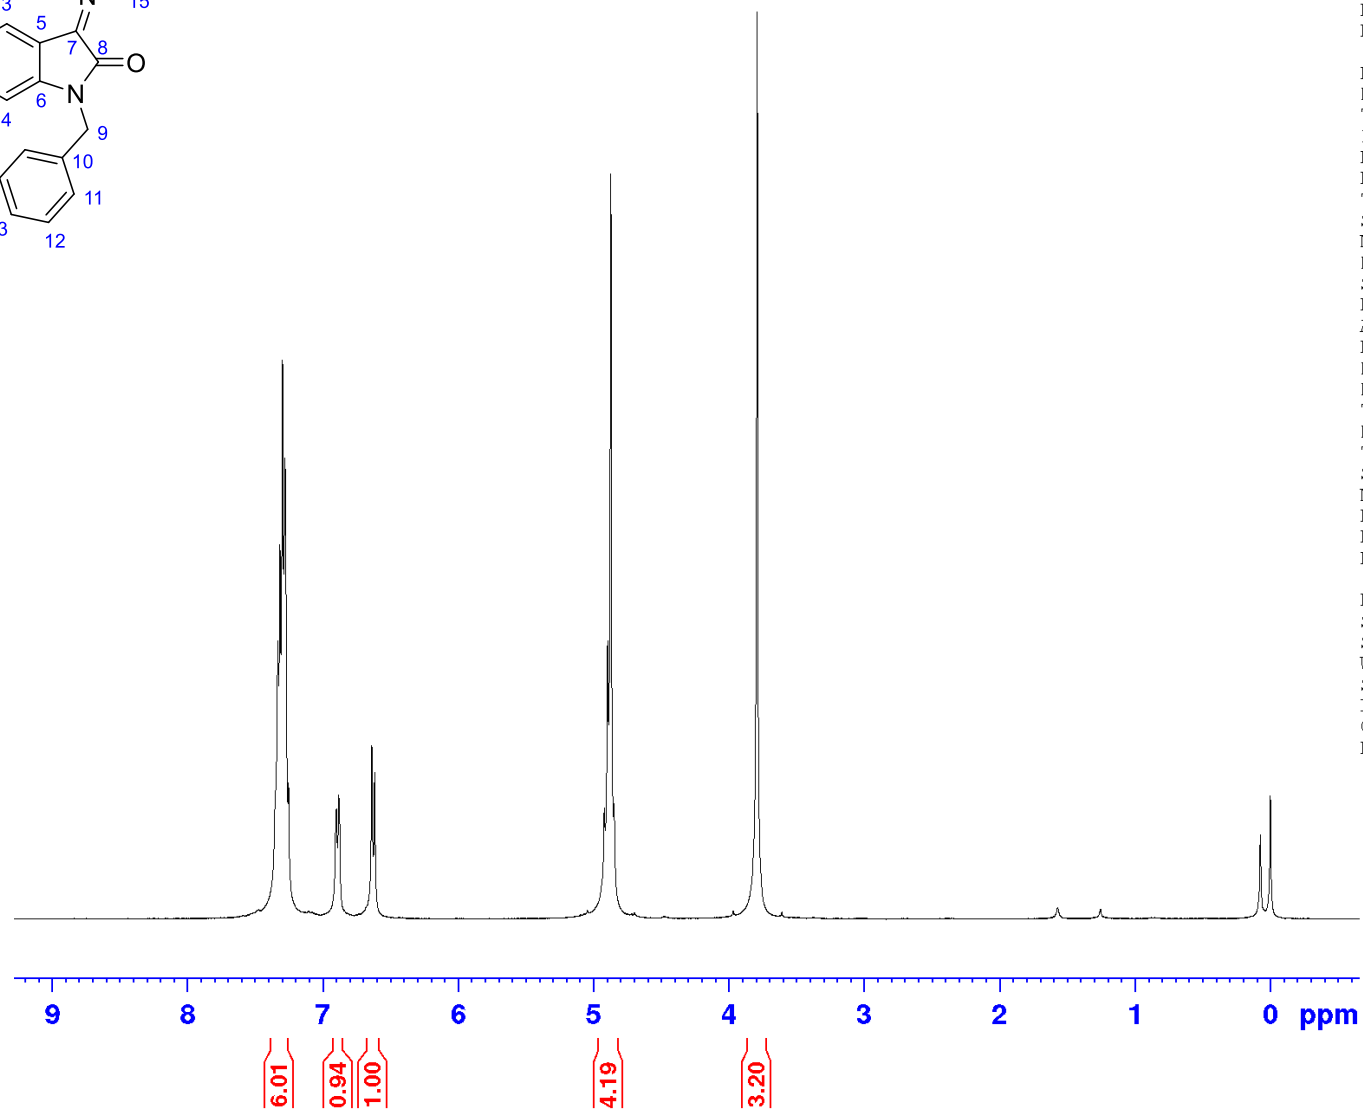

Current Data Parameters  
 NAME WR 2.230 C1  
 EXPNO 10  
 PROCNO 1

F2 - Acquisition Parameters  
 Date\_ 20211009  
 Time 16.18 h  
 INSTRUM AVIII\_400  
 PROBHD Z108618\_0146 ( )  
 PULPROG zg30  
 TD 65536  
 SOLVENT CDCl3  
 NS 16  
 DS 2  
 SWH 8223.685 Hz  
 FIDRES 0.250967 Hz  
 AQ 3.9845889 sec  
 RG 181  
 DW 60.800 usec  
 DE 17.42 usec  
 TE 300.0 K  
 D1 1.00000000 sec  
 TD0 1  
 SFO1 400.1124708 MHz  
 NUC1 1H  
 P0 5.00 usec  
 P1 15.00 usec  
 PLW1 17.29199982 W

F2 - Processing parameters  
 SI 32768  
 SF 400.1100121 MHz  
 WDW EM  
 SSB 0  
 LB 0.30 Hz  
 GB 0  
 PC 1.00



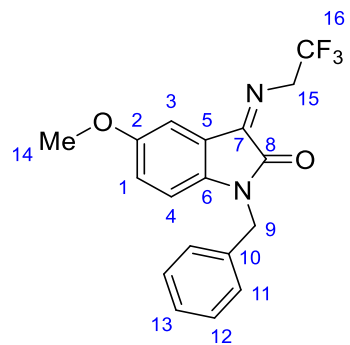

1d

<sup>13</sup>C NMR

101 MHz

CDCl<sub>3</sub>

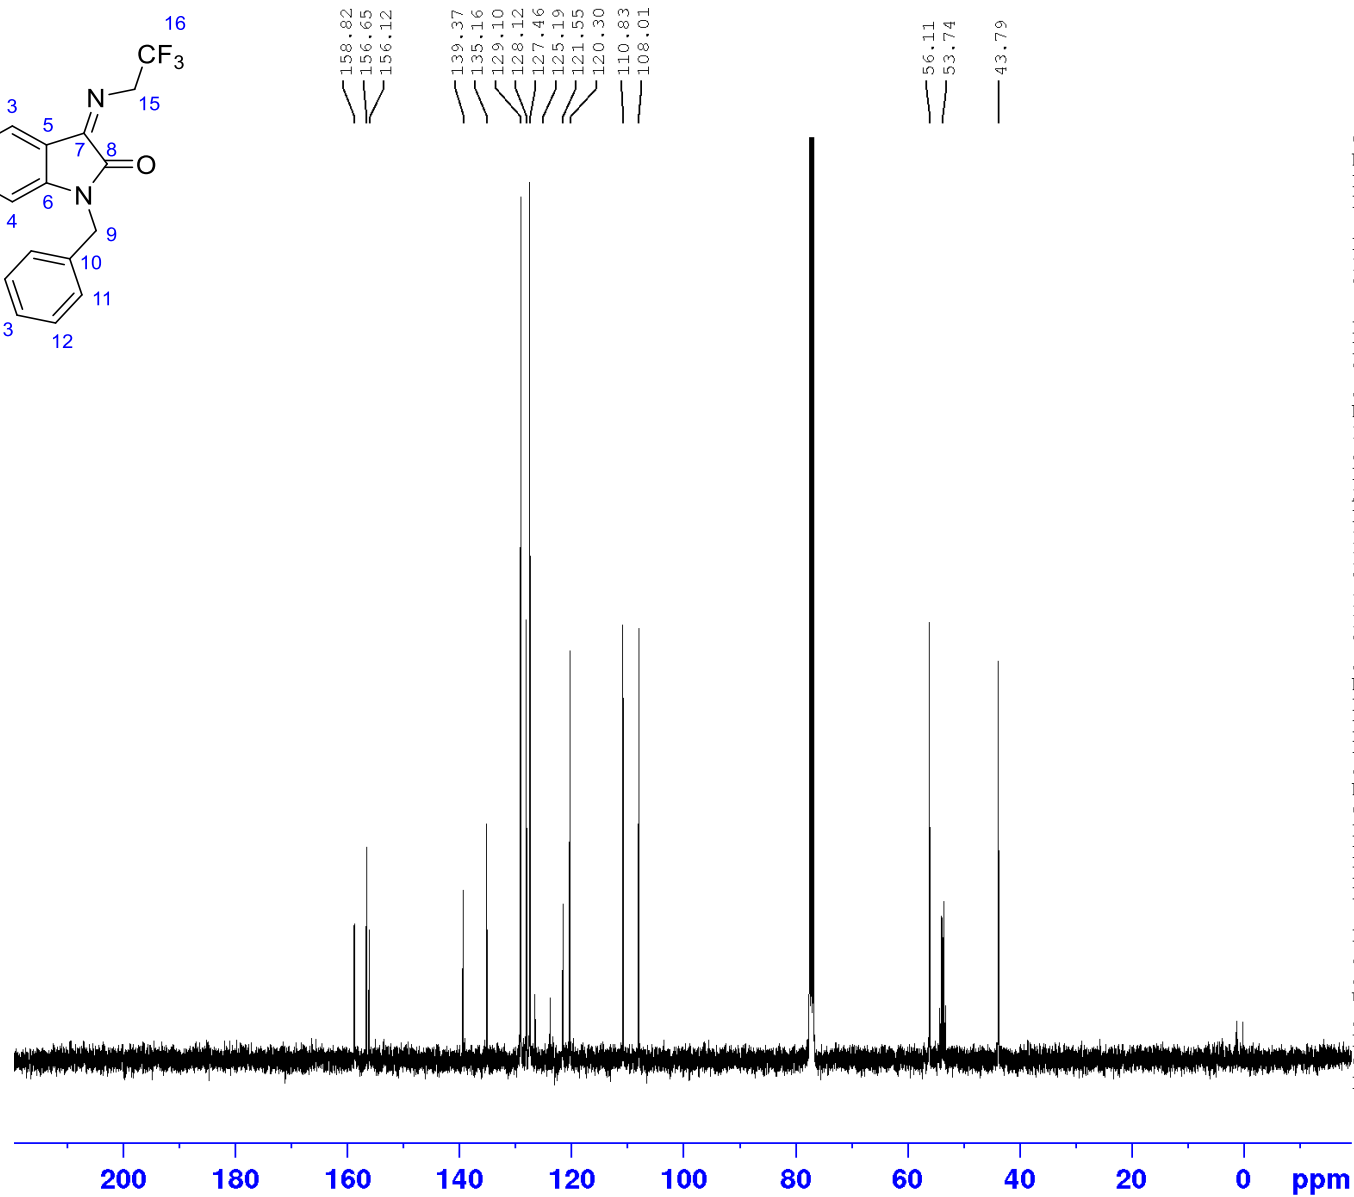

Current Data Parameters  
 NAME WR 2.230 C1  
 EXPNO 11  
 PROCNO 1

F2 - Acquisition Parameters  
 Date\_ 20211009  
 Time 17.12 h  
 INSTRUM AVIII\_400  
 PROBHD Z108618\_0146 (  
 PULPROG zgpg30  
 TD 96150  
 SOLVENT CDCl3  
 NS 1024  
 DS 4  
 SWH 24038.461 Hz  
 FIDRES 0.500020 Hz  
 AQ 1.9999200 sec  
 RG 2050  
 DW 20.800 usec  
 DE 6.50 usec  
 TE 300.0 K  
 D1 1.00000000 sec  
 D11 0.03000000 sec  
 TD0 1  
 SFO1 100.6178003 MHz  
 NUC1 13C  
 P0 3.00 usec  
 P1 9.00 usec  
 PLW1 96.68000031 W  
 SFO2 400.1116004 MHz  
 NUC2 1H  
 CPDPRG[2] waltz64  
 PCPD2 90.00 usec  
 PLW2 17.29199982 W  
 PLW12 0.48032999 W  
 PLW13 0.24160001 W

F2 - Processing parameters  
 SI 131072  
 SF 100.6077267 MHz  
 WDW EM  
 SSB 0  
 LB 1.00 Hz  
 GB 0  
 PC 1.40



1d

<sup>19</sup>F NMR

376 MHz

CDCl<sub>3</sub>

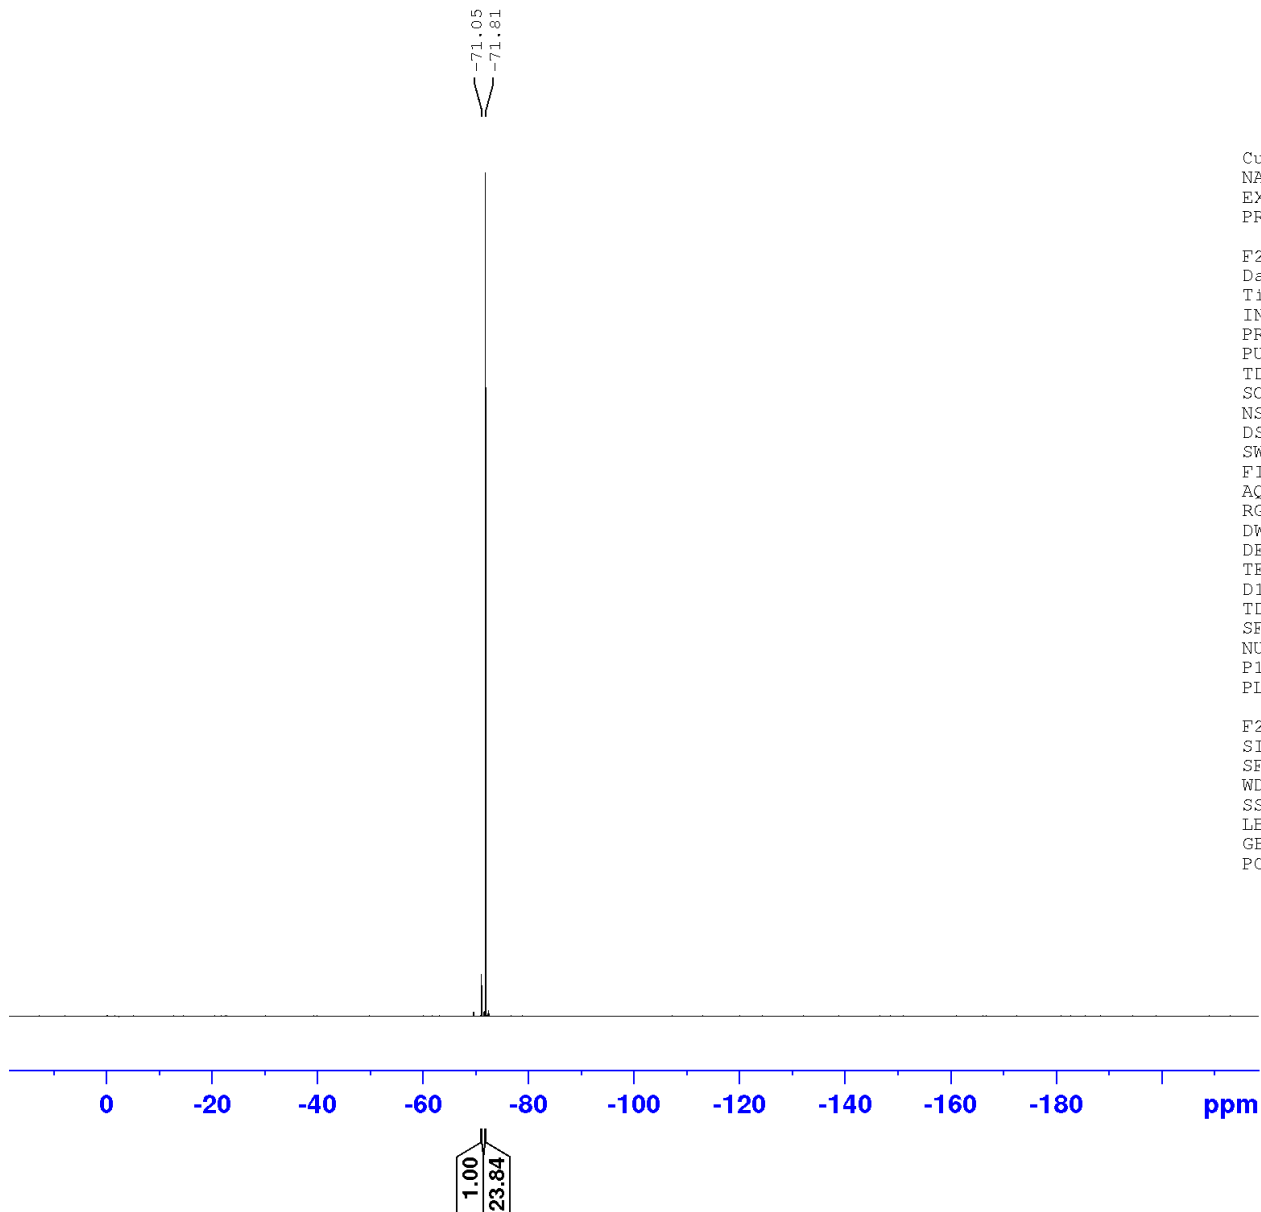

Current Data Parameters  
 NAME WR 2.230 C1  
 EXPNO 17  
 PROCNO 1

F2 - Acquisition Parameters  
 Date\_ 20211009  
 Time 18.29 h  
 INSTRUM AVIII\_400  
 PROBHD Z108618\_0146 (  
 PULPROG zg  
 TD 261992  
 SOLVENT CDCl3  
 NS 16  
 DS 4  
 SWH 89285.711 Hz  
 FIDRES 0.681591 Hz  
 AQ 1.4671552 sec  
 RG 724  
 DW 5.600 usec  
 DE 7.11 usec  
 TE 300.0 K  
 D1 1.00000000 sec  
 TD0 1  
 SFO1 376.4418995 MHz  
 NUC1 19F  
 P1 11.80 usec  
 PLW1 32.96500015 W

F2 - Processing parameters  
 SI 262144  
 SF 376.4795470 MHz  
 WDW EM  
 SSB 0  
 LB 0.30 Hz  
 GB 0  
 PC 1.00

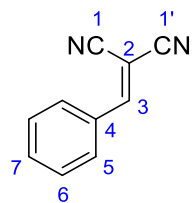

2a

<sup>1</sup>H NMR

400 MHz

CDCl<sub>3</sub>

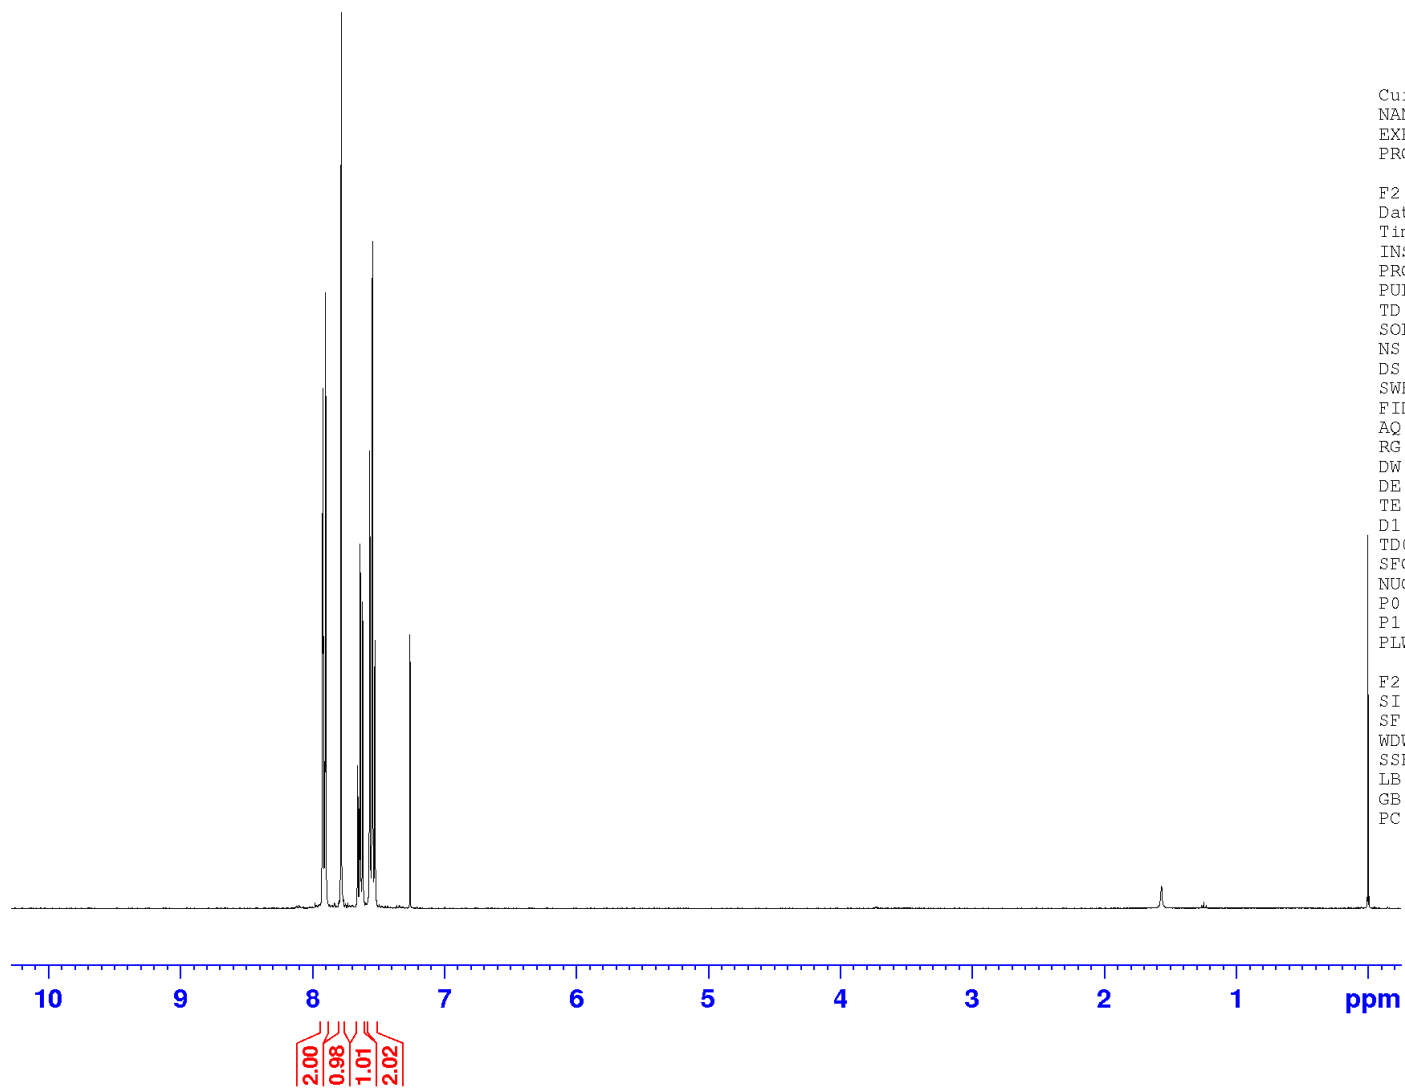

Current Data Parameters  
 NAME CAD-1-12 Batch 2  
 EXPNO 10  
 PROCNO 1

F2 - Acquisition Parameters  
 Date\_ 20191112  
 Time 15.04 h  
 INSTRUM AVIII\_400  
 PROBHD Z108618\_0146 (  
 PULPROG zg30  
 TD 65536  
 SOLVENT CDCl3  
 NS 16  
 DS 2  
 SWH 8223.685 Hz  
 FIDRES 0.250967 Hz  
 AQ 3.9845889 sec  
 RG 203  
 DW 60.800 usec  
 DE 17.42 usec  
 TE 300.0 K  
 D1 1.00000000 sec  
 TD0 1  
 SFO1 400.1124708 MHz  
 NUC1 1H  
 P0 5.00 usec  
 P1 15.00 usec  
 PLW1 17.29199982 W

F2 - Processing parameters  
 SI 32768  
 SF 400.1100097 MHz  
 WDW EM  
 SSB 0  
 LB 0.30 Hz  
 GB 0  
 PC 1.00

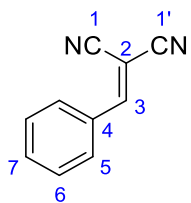

2a

$^{13}\text{C}$  NMR

101 MHz

$\text{CDCl}_3$

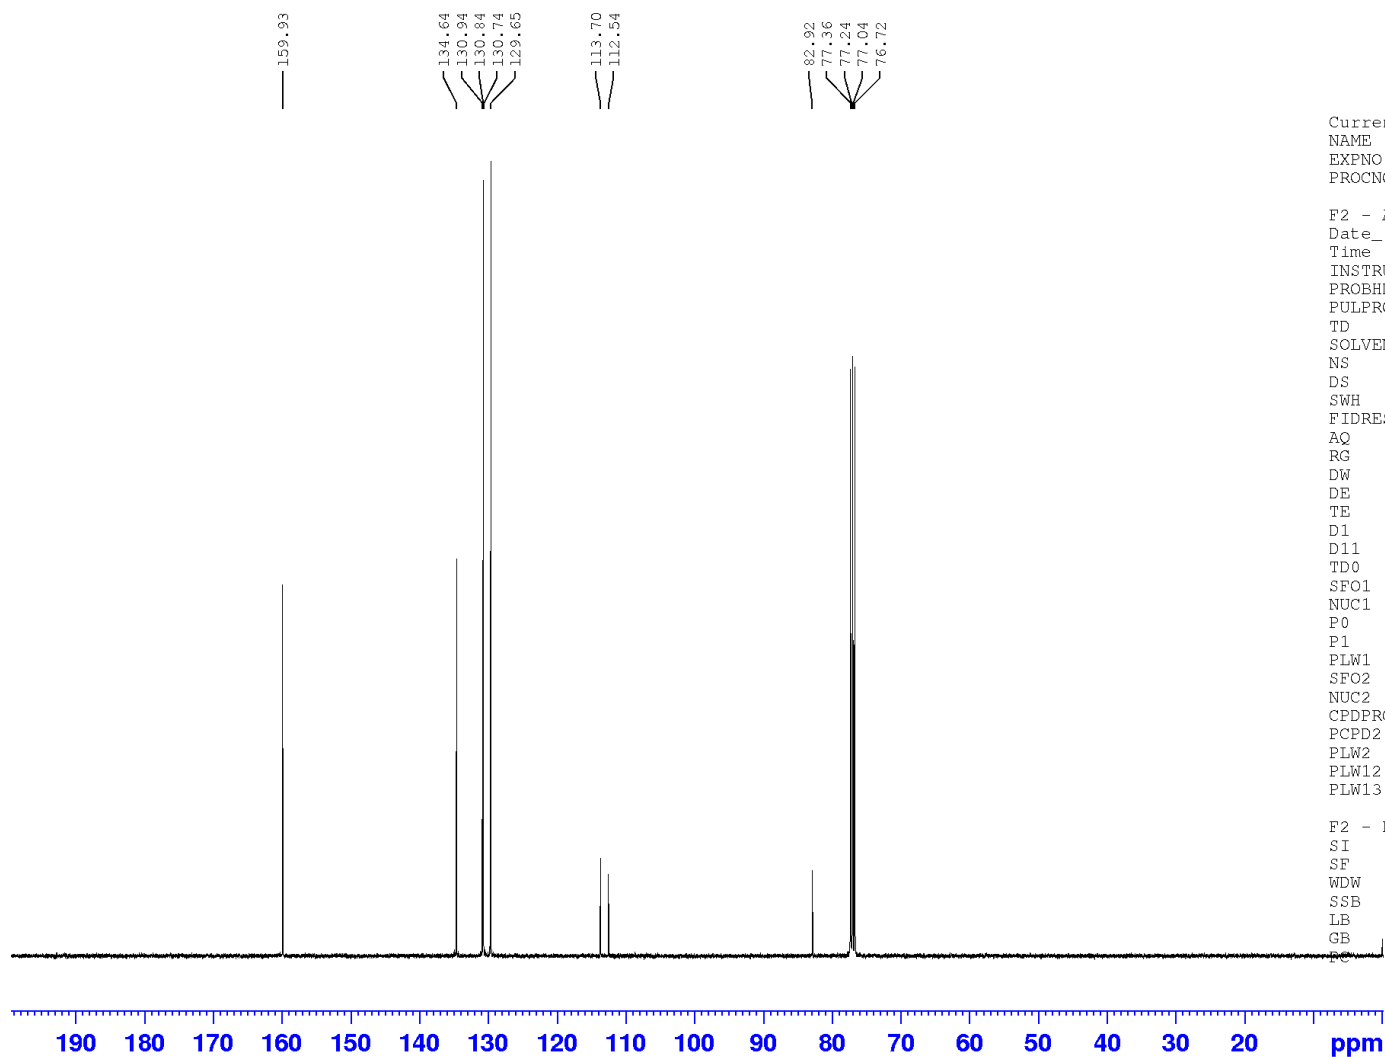

Current Data Parameters  
 NAME CAD-1-12 Batch 2  
 EXPNO 11  
 PROCNO 1

F2 - Acquisition Parameters  
 Date\_ 20191113  
 Time 3.03 h  
 INSTRUM AVIII\_400  
 PROBHD Z108618\_0146 (  
 PULPROG zgpg30  
 TD 96150  
 SOLVENT CDCl3  
 NS 2048  
 DS 4  
 SWH 24038.461 Hz  
 FIDRES 0.500020 Hz  
 AQ 1.9999200 sec  
 RG 2050  
 DW 20.800 usec  
 DE 6.50 usec  
 TE 300.0 K  
 D1 1.00000000 sec  
 D11 0.03000000 sec  
 TD0 1  
 SFO1 100.6178003 MHz  
 NUC1 13C  
 P0 3.00 usec  
 P1 9.00 usec  
 PLW1 96.68000031 W  
 SFO2 400.1116004 MHz  
 NUC2 1H  
 CPDPRG[2] waltz64  
 PCPD2 90.00 usec  
 PLW2 17.29199982 W  
 PLW12 0.48032999 W  
 PLW13 0.24160001 W

F2 - Processing parameters  
 SI 131072  
 SF 100.6077408 MHz  
 WDW EM  
 SSB 0  
 LB 1.00 Hz  
 GB 0  
 PC 1.40

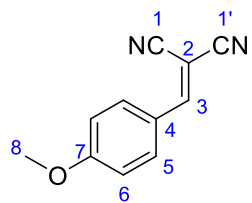

2b

<sup>1</sup>H NMR

400 MHz

CDCl<sub>3</sub>

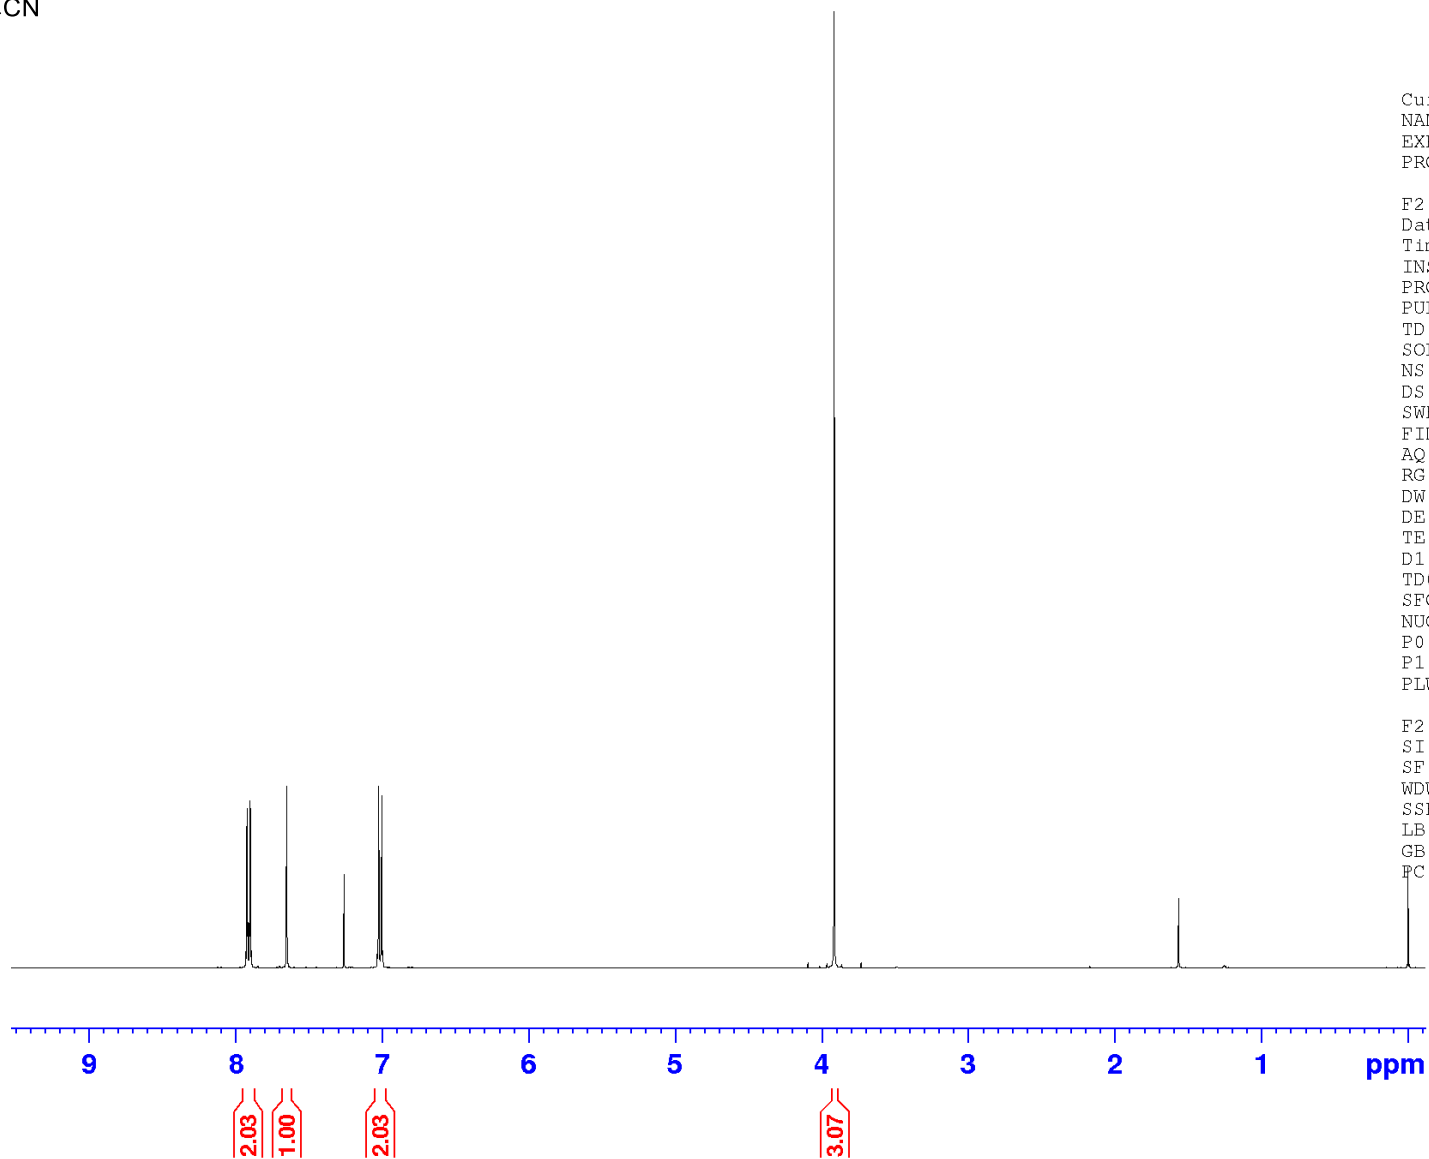

Current Data Parameters  
NAME CAD-1-15  
EXPNO 10  
PROCNO 1

F2 - Acquisition Parameters  
Date\_ 20200114  
Time 12.44  
INSTRUM AVIII\_400  
PROBHD Z108618\_0146 (zgpg30)  
PULPROG zg30  
TD 65536  
SOLVENT CDCl3  
NS 32  
DS 2  
SWH 8223.685  
FIDRES 0.250967  
AQ 3.9845889  
RG 256  
DW 60.800  
DE 17.42  
TE 300.0  
D1 1.0000000  
TD0 1  
SFO1 400.1124708  
NUC1 1H  
P0 5.00  
P1 15.00  
PLW1 17.29199982

F2 - Processing parameters  
SI 32768  
SF 400.1100098  
WDW EM  
SSB 0  
LB 0.30  
GB 0  
PC 1.00

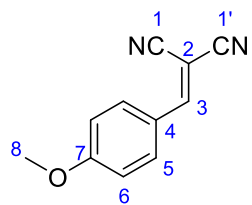

2b

<sup>13</sup>C NMR

101 MHz

CDCl<sub>3</sub>

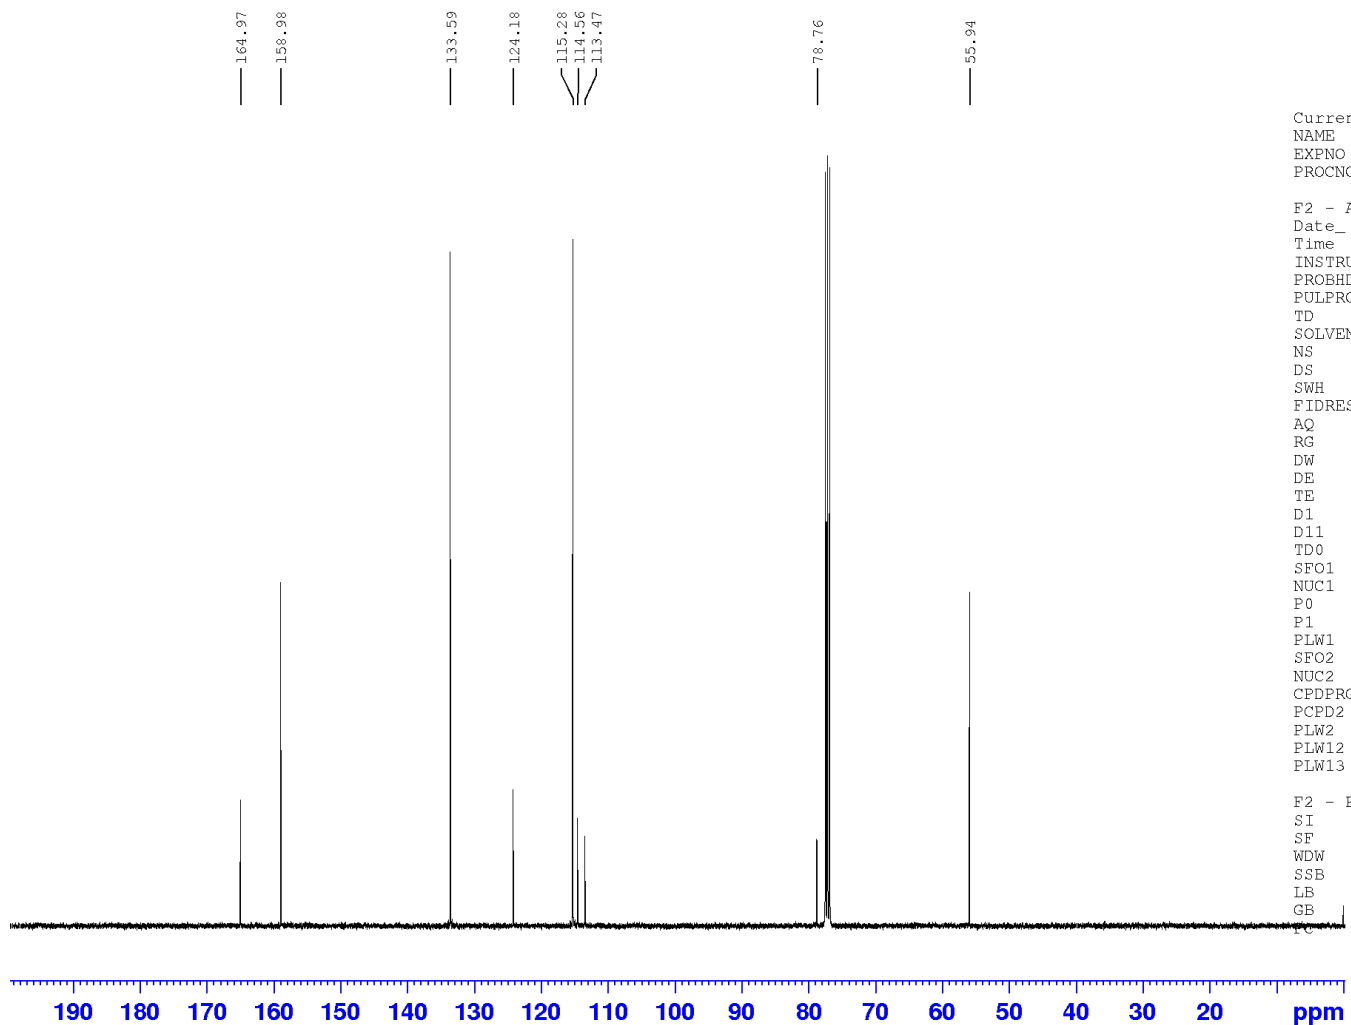

Current Data Parameters  
 NAME CAD-1-15  
 EXPNO 13  
 PROCNO 1

F2 - Acquisition Parameters  
 Date\_ 20200117  
 Time 6.33 h  
 INSTRUM AVIII\_400  
 PROBHD Z108618\_0146 ( )  
 PULPROG zgpg30  
 TD 96150  
 SOLVENT CDC13  
 NS 2048  
 DS 4  
 SWH 24038.461 Hz  
 FIDRES 0.500020 Hz  
 AQ 1.9999200 sec  
 RG 2050  
 DW 20.800 usec  
 DE 6.50 usec  
 TE 300.0 K  
 D1 1.00000000 sec  
 D11 0.03000000 sec  
 TD0 1  
 SFO1 100.6178003 MHz  
 NUC1 13C  
 P0 3.00 usec  
 P1 9.00 usec  
 PLW1 96.68000031 W  
 SFO2 400.1116004 MHz  
 NUC2 1H  
 CPDPRG[2] waltz64  
 PCPD2 90.00 usec  
 PLW2 17.29199982 W  
 PLW12 0.48032999 W  
 PLW13 0.24160001 W

F2 - Processing parameters  
 SI 131072  
 SF 100.6077273 MHz  
 WDW EM  
 SSB 0  
 LB 1.00 Hz  
 GB 0  
 PC 1.40

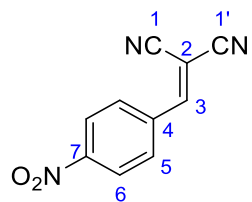

2c

<sup>1</sup>H NMR

400 MHz

CDCl<sub>3</sub>

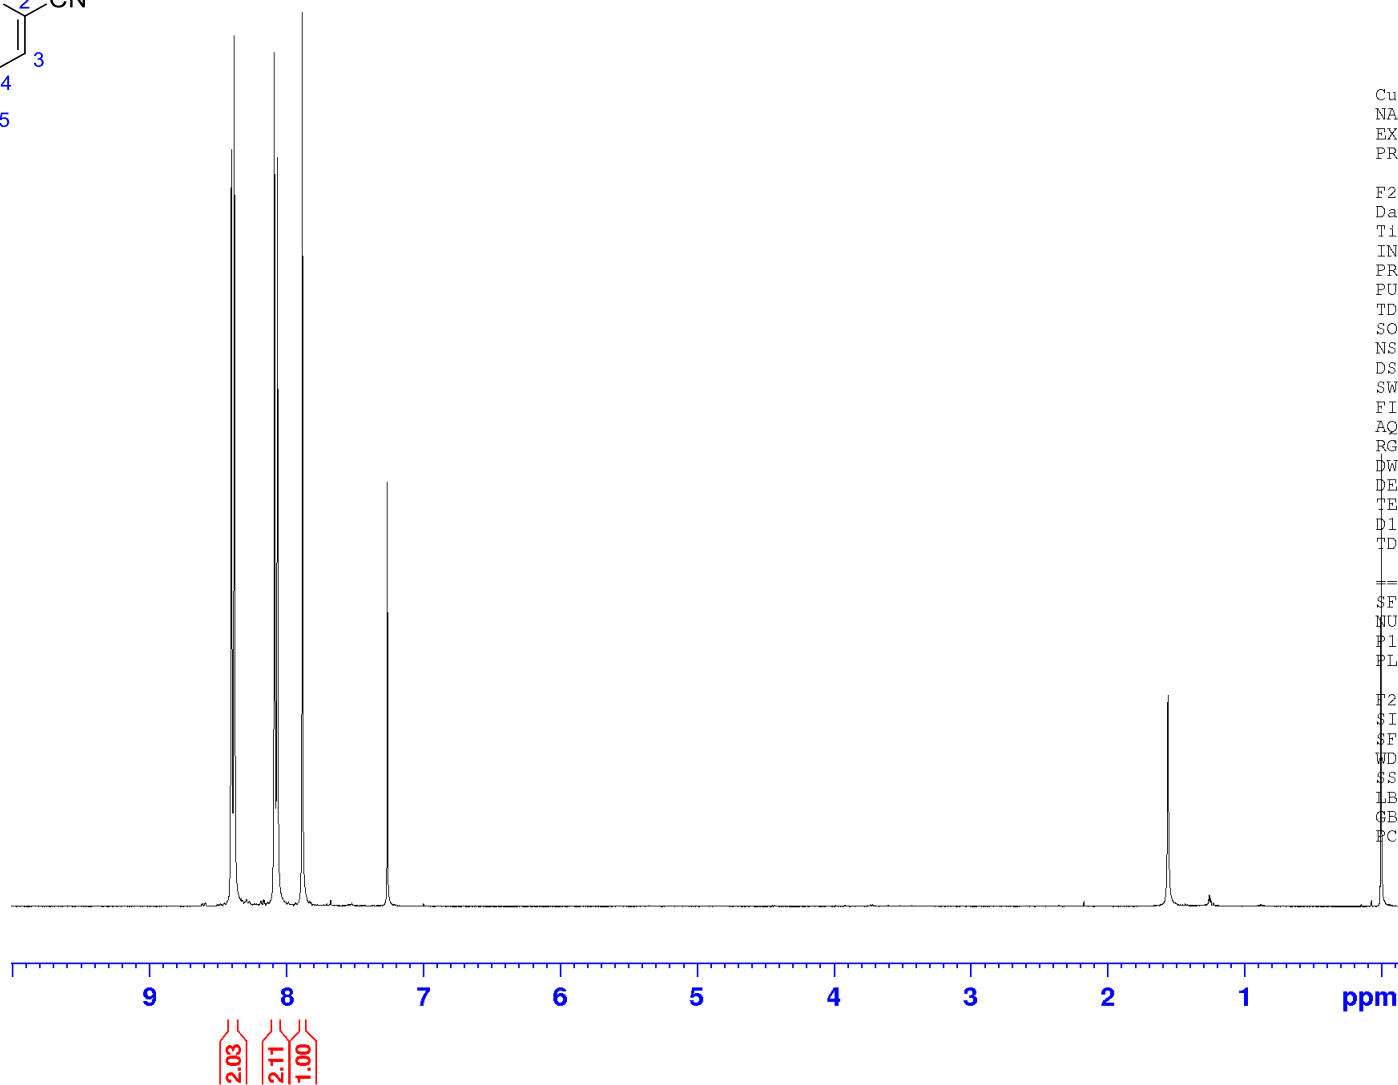

```

Current Data Parameters
NAME      CAD-1-16B high vac
EXPNO     10
PROCNO    1

F2 - Acquisition Parameters
Date_     20200117
Time      16.22
INSTRUM   AVIII_400
PROBHD    5 mm PABBO BB/
PULPROG   zg30
TD        65536
SOLVENT   CDC13
NS        32
DS        2
SWH       8223.685 Hz
FIDRES    0.125483 Hz
AQ        3.9845889 sec
RG        128
DW        60.800 usec
DE        6.50 usec
TE        298.2 K
D1        1.00000000 sec
TD0       1

----- CHANNEL f1 -----
$FO1     399.9124696 MHz
NUC1     1H
P1       15.00 usec
PLW1     17.29199982 W

F2 - Processing parameters
$F1     399.9100085 MHz
WDW     EM
$SB     0
LB      0.30 Hz
GB      0
PC      1.00
  
```

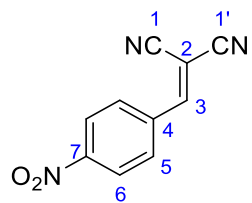

2c

<sup>13</sup>C NMR

101 MHz

CDCl<sub>3</sub>

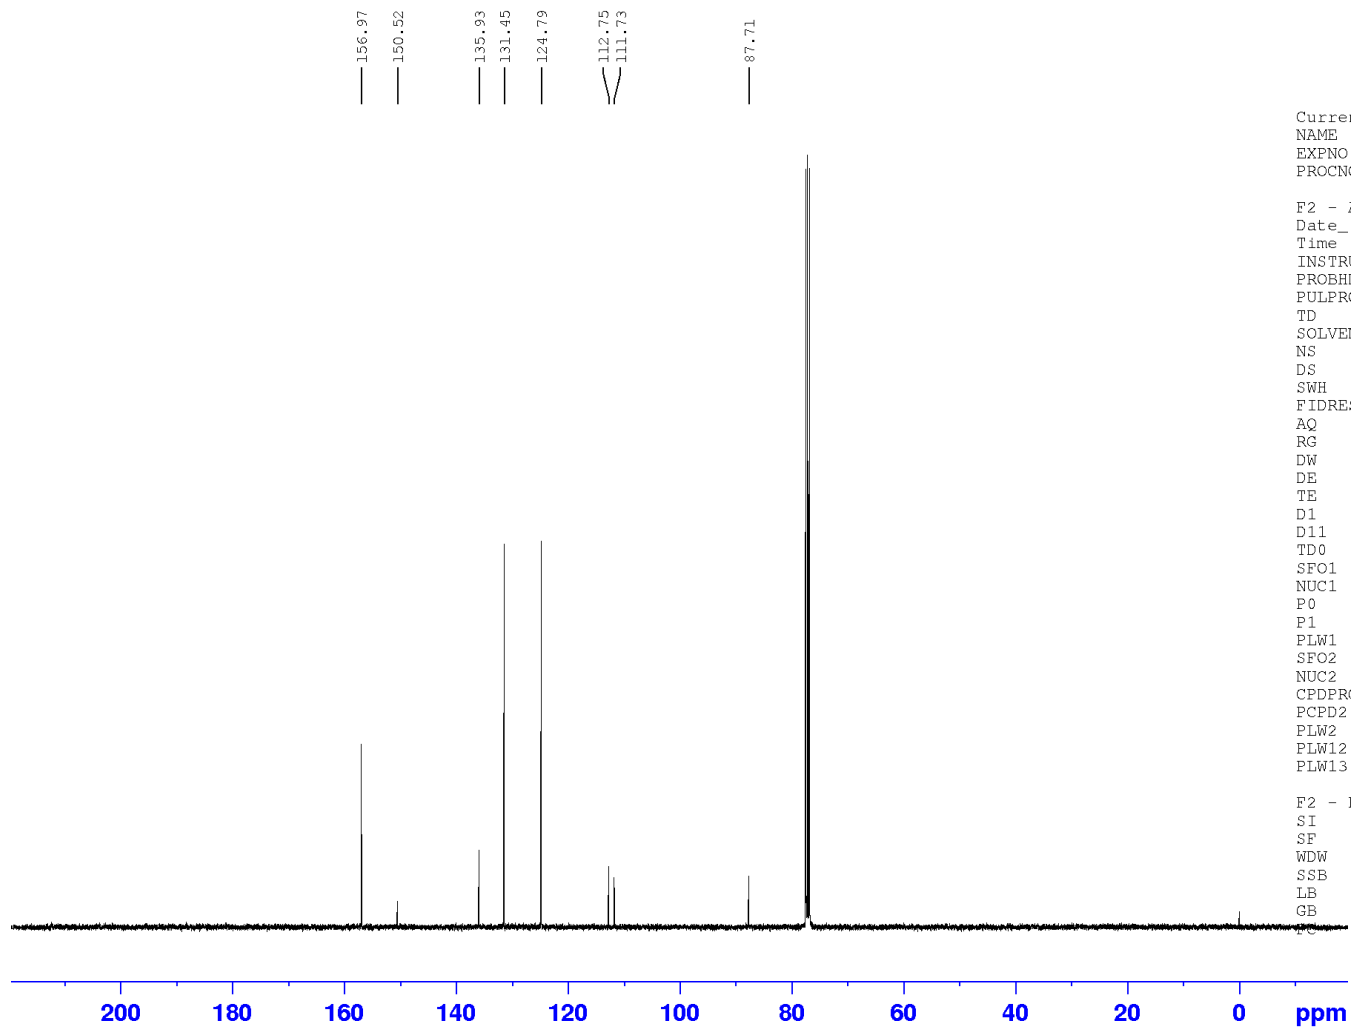

Current Data Parameters  
 NAME CAD-1-16B high vac  
 EXPNO 13  
 PROCNO 1

F2 - Acquisition Parameters  
 Date\_ 20200120  
 Time 20.49 h  
 INSTRUM AVIII\_400  
 PROBHD Z108618\_0146 (  
 PULPROG zgpg30  
 TD 96150  
 SOLVENT CDCl3  
 NS 2048  
 DS 4  
 SWH 24038.461 Hz  
 FIDRES 0.500020 Hz  
 AQ 1.9999200 sec  
 RG 2050  
 DW 20.800 usec  
 DE 6.50 usec  
 TE 300.0 K  
 D1 1.00000000 sec  
 D11 0.03000000 sec  
 TD0 1  
 SFO1 100.6178003 MHz  
 NUC1 13C  
 P0 3.00 usec  
 P1 9.00 usec  
 PLW1 96.68000031 W  
 SFO2 400.1116004 MHz  
 NUC2 1H  
 CPDPRG[2] waltz64  
 PCPD2 90.00 usec  
 PLW2 17.29199982 W  
 PLW12 0.48032999 W  
 PLW13 0.24160001 W

F2 - Processing parameters  
 SI 131072  
 SF 100.6077269 MHz  
 WDW EM  
 SSB 0  
 LB 1.00 Hz  
 GB 0  
 PC 1.40



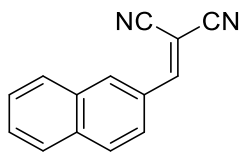

2d

<sup>1</sup>H NMR

400 MHz

CDCl<sub>3</sub>

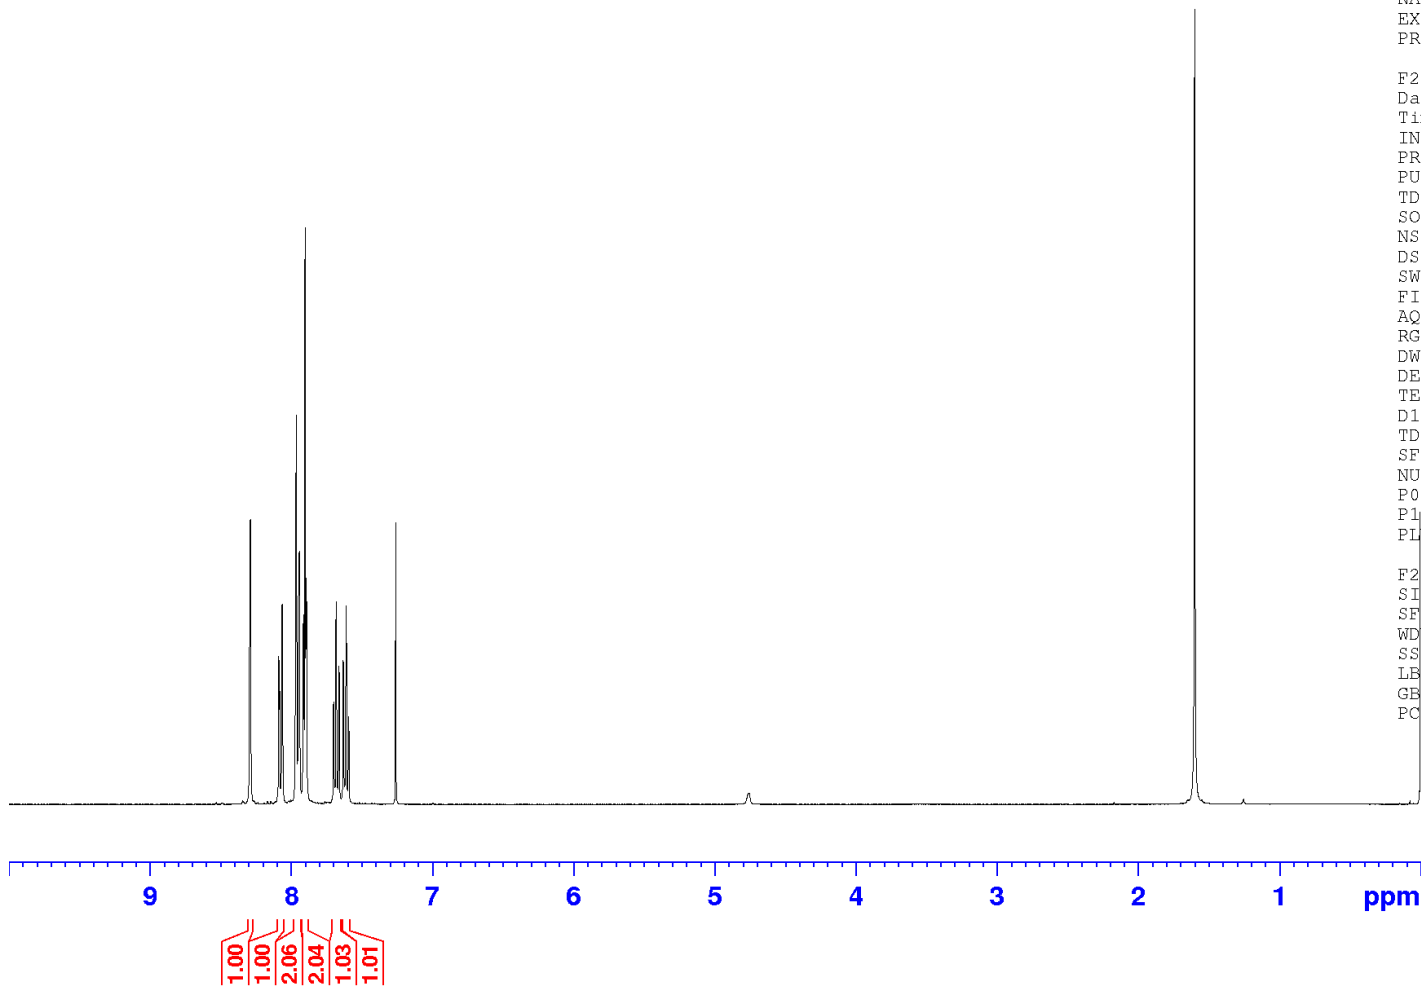

Current Data Parameters  
NAME CAD-1-19  
EXPNO 10  
PROCNO 1

F2 - Acquisition Parameters  
Date\_ 20200120  
Time 15.38 h  
INSTRUM AVIII\_400  
PROBHD Z108618\_0146 (  
PULPROG zg30  
TD 65536  
SOLVENT CDCl3  
NS 32  
DS 2  
SWH 8223.685 Hz  
FIDRES 0.250967 Hz  
AQ 3.9845889 sec  
RG 256  
DW 60.800 usec  
DE 17.42 usec  
TE 300.0 K  
D1 1.00000000 sec  
TD0 1  
SFO1 400.1124708 MHz  
NUC1 1H  
P0 5.00 usec  
P1 15.00 usec  
PLW1 17.29199982 W

F2 - Processing parameters  
SI 32768  
SF 400.1100098 MHz  
WDW EM  
SSB 0  
LB 0.30 Hz  
GB 0  
PC 1.00

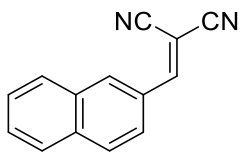

2d

<sup>13</sup>C NMR

101 MHz

CDCl<sub>3</sub>

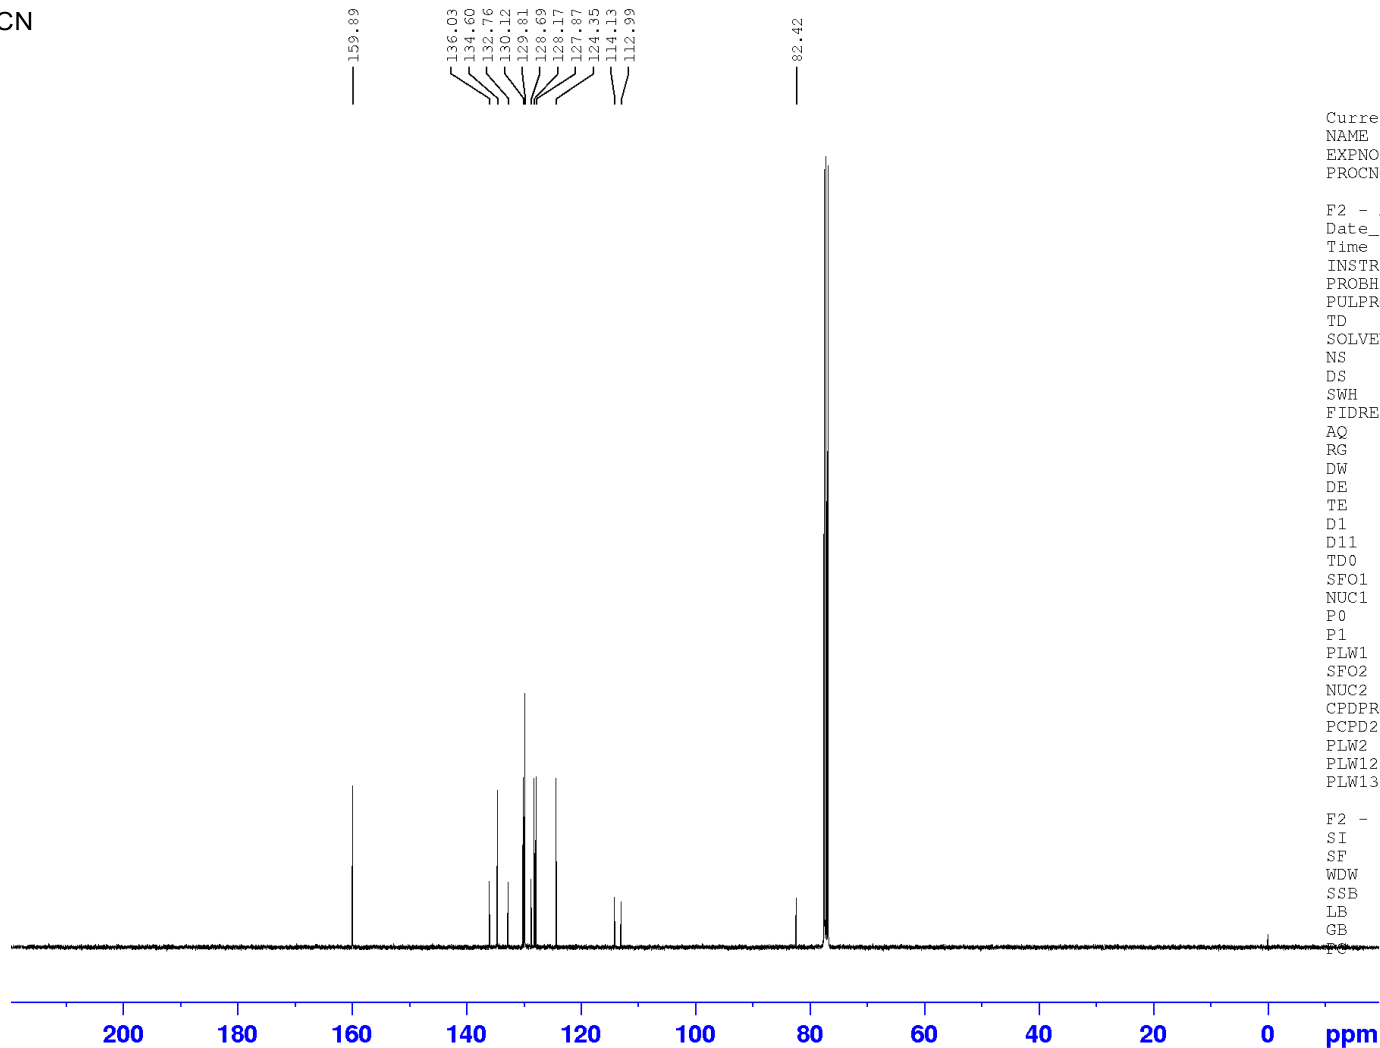

Current Data Parameters  
NAME CAD-1-19  
EXPNO 13  
PROCNO 1

F2 - Acquisition Parameters  
Date\_ 20200121  
Time 1.55 h  
INSTRUM AVIII\_400  
PROBHD Z108618\_0146 ( )  
PULPROG zgpg30  
TD 96150  
SOLVENT CDC13  
NS 2048  
DS 4  
SWH 24038.461 Hz  
FIDRES 0.500020 Hz  
AQ 1.9999200 sec  
RG 2050  
DW 20.800 usec  
DE 6.50 usec  
TE 300.0 K  
D1 1.00000000 sec  
D11 0.03000000 sec  
TD0 1  
SFO1 100.6178003 MHz  
NUC1 13C  
P0 3.00 usec  
P1 9.00 usec  
PLW1 96.68000031 W  
SFO2 400.1116004 MHz  
NUC2 1H  
CPDPRG[2] waltz64  
PCPD2 90.00 usec  
PLW2 17.29199982 W  
PLW12 0.48032999 W  
PLW13 0.24160001 W

F2 - Processing parameters  
SI 131072  
SF 100.6077275 MHz  
WDW EM  
SSB 0  
LB 1.00 Hz  
GB 0  
PC 1.40

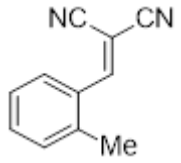

2e

<sup>1</sup>H NMR

400 MHz

CDCl<sub>3</sub>

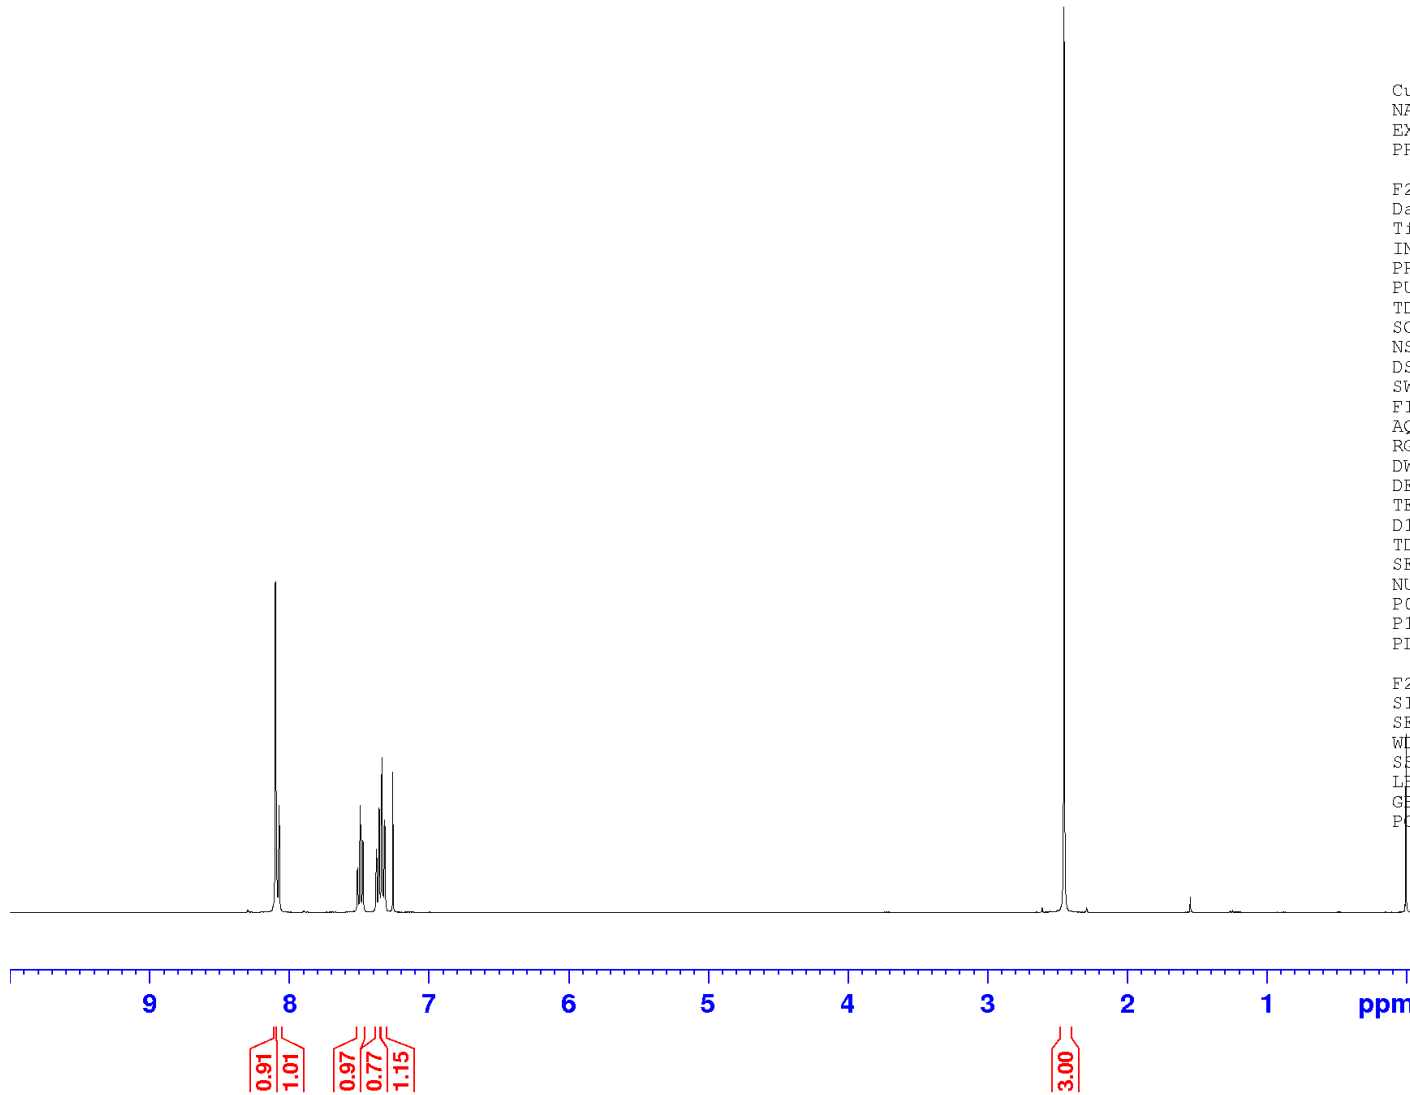

Current Data Parameters  
NAME WR 2.159  
EXPNO 10  
PROCNO 1

F2 - Acquisition Parameters  
Date\_ 20210428  
Time 13.08 h  
INSTRUM AVIII\_400  
PROBHD Z108618\_0146 (  
PULPROG zg30  
TD 65536  
SOLVENT CDC13  
NS 16  
DS 2  
SWH 8223.685 Hz  
FIDRES 0.250967 Hz  
AQ 3.9845889 sec  
RG 256  
DW 60.800 usec  
DE 17.42 usec  
TE 300.0 K  
D1 1.00000000 sec  
TD0 1  
SFO1 400.1124708 MHz  
NUC1 1H  
P0 5.00 usec  
P1 15.00 usec  
PLW1 17.29199982 W

F2 - Processing parameters  
SI 32768  
SF 400.1100104 MHz  
WDW EM  
SBB 0  
LB 0.30 Hz  
GB 0  
PC 1.00

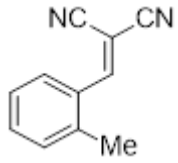

2e

<sup>13</sup>C NMR

101 MHz

CDCl<sub>3</sub>

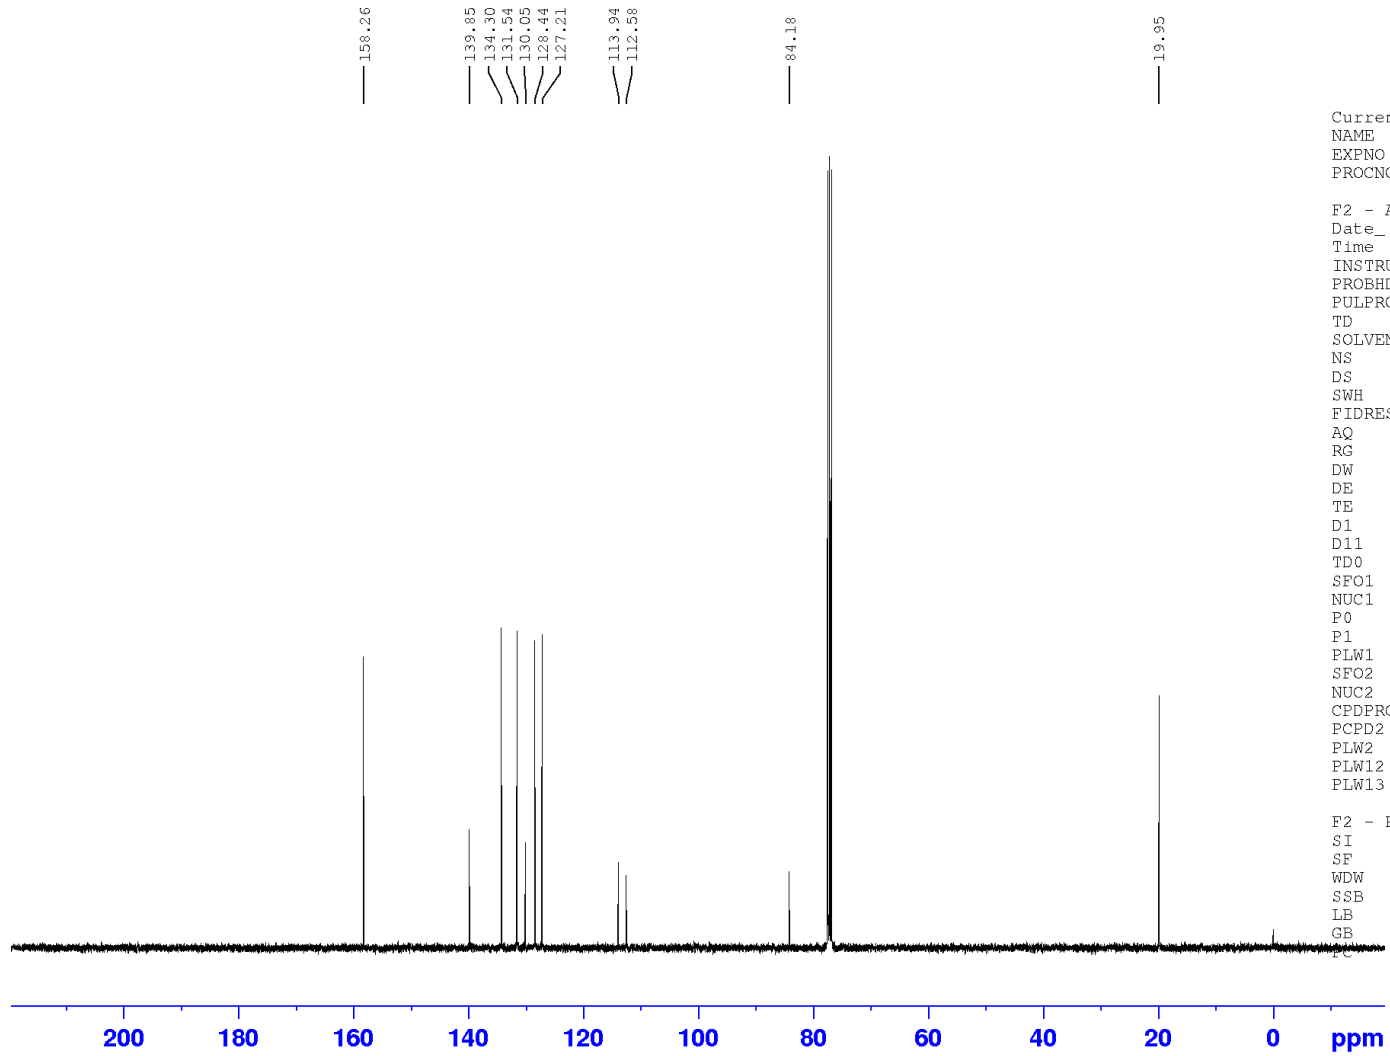

Current Data Parameters  
 NAME WR 2.159  
 EXPNO 11  
 PROCNO 1

F2 - Acquisition Parameters  
 Date\_ 20210428  
 Time 22.39 h  
 INSTRUM AVIII\_400  
 PROBHD Z108618\_0146 (  
 PULPROG zgpg30  
 TD 96150  
 SOLVENT CDC13  
 NS 1024  
 DS 4  
 SWH 24038.461 Hz  
 FIDRES 0.500020 Hz  
 AQ 1.9999200 sec  
 RG 2050  
 DW 20.800 usec  
 DE 6.50 usec  
 TE 300.0 K  
 D1 1.0000000 sec  
 D11 0.03000000 sec  
 TD0 1  
 SFO1 100.6178003 MHz  
 NUC1 13C  
 P0 3.00 usec  
 P1 9.00 usec  
 PLW1 96.68000031 W  
 SFO2 400.1116004 MHz  
 NUC2 1H  
 CPDPRG[2] waltz64  
 PCPD2 90.00 usec  
 PLW2 17.29199982 W  
 PLW12 0.48032999 W  
 PLW13 0.24160001 W

F2 - Processing parameters  
 SI 131072  
 SF 100.6077274 MHz  
 WDW EM  
 SSB 0  
 LB 1.00 Hz  
 GB 0  
 GC 1.40

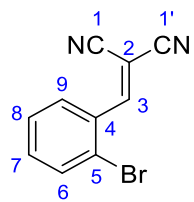

2f

<sup>1</sup>H NMR

400 MHz

CDCl<sub>3</sub>

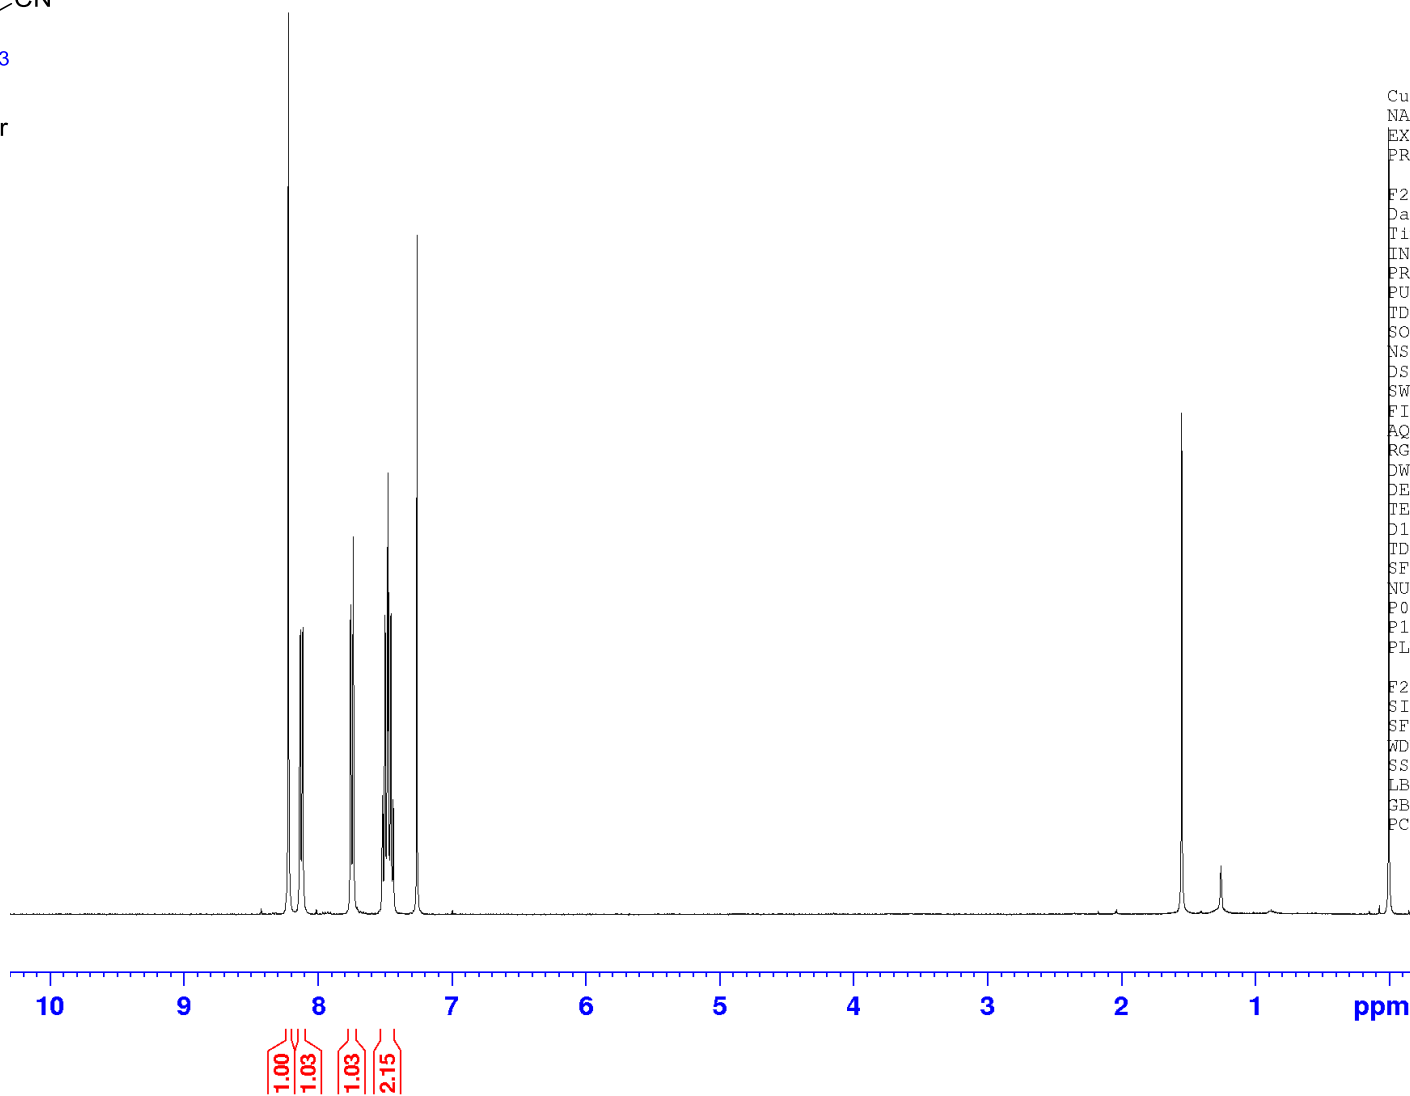

Current Data Parameters  
 NAME CAD-1-21  
 EXPNO 10  
 PROCNO 1

F2 - Acquisition Parameters  
 Date\_ 20200121  
 Time 16.53 h  
 INSTRUM AVIII\_400  
 PROBHD Z108618\_0146 (  
 PULPROG zg30  
 TD 65536  
 SOLVENT CDCl3  
 NS 32  
 DS 2  
 SWH 8223.685 Hz  
 FIDRES 0.250967 Hz  
 AQ 3.9845889 sec  
 RG 256  
 DW 60.800 usec  
 DE 17.42 usec  
 TE 300.0 K  
 D1 1.00000000 sec  
 TD0 1  
 SFO1 400.1124708 MHz  
 NUC1 1H  
 P0 5.00 usec  
 P1 15.00 usec  
 PLW1 17.29199982 W

F2 - Processing parameters  
 SI 32768  
 SF 400.1100097 MHz  
 WDW EM  
 SSB 0  
 LB 0.30 Hz  
 SB 0  
 PC 1.00

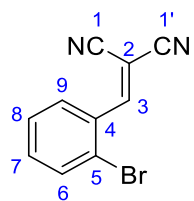

2f

<sup>13</sup>C NMR

101 MHz

CDCl<sub>3</sub>

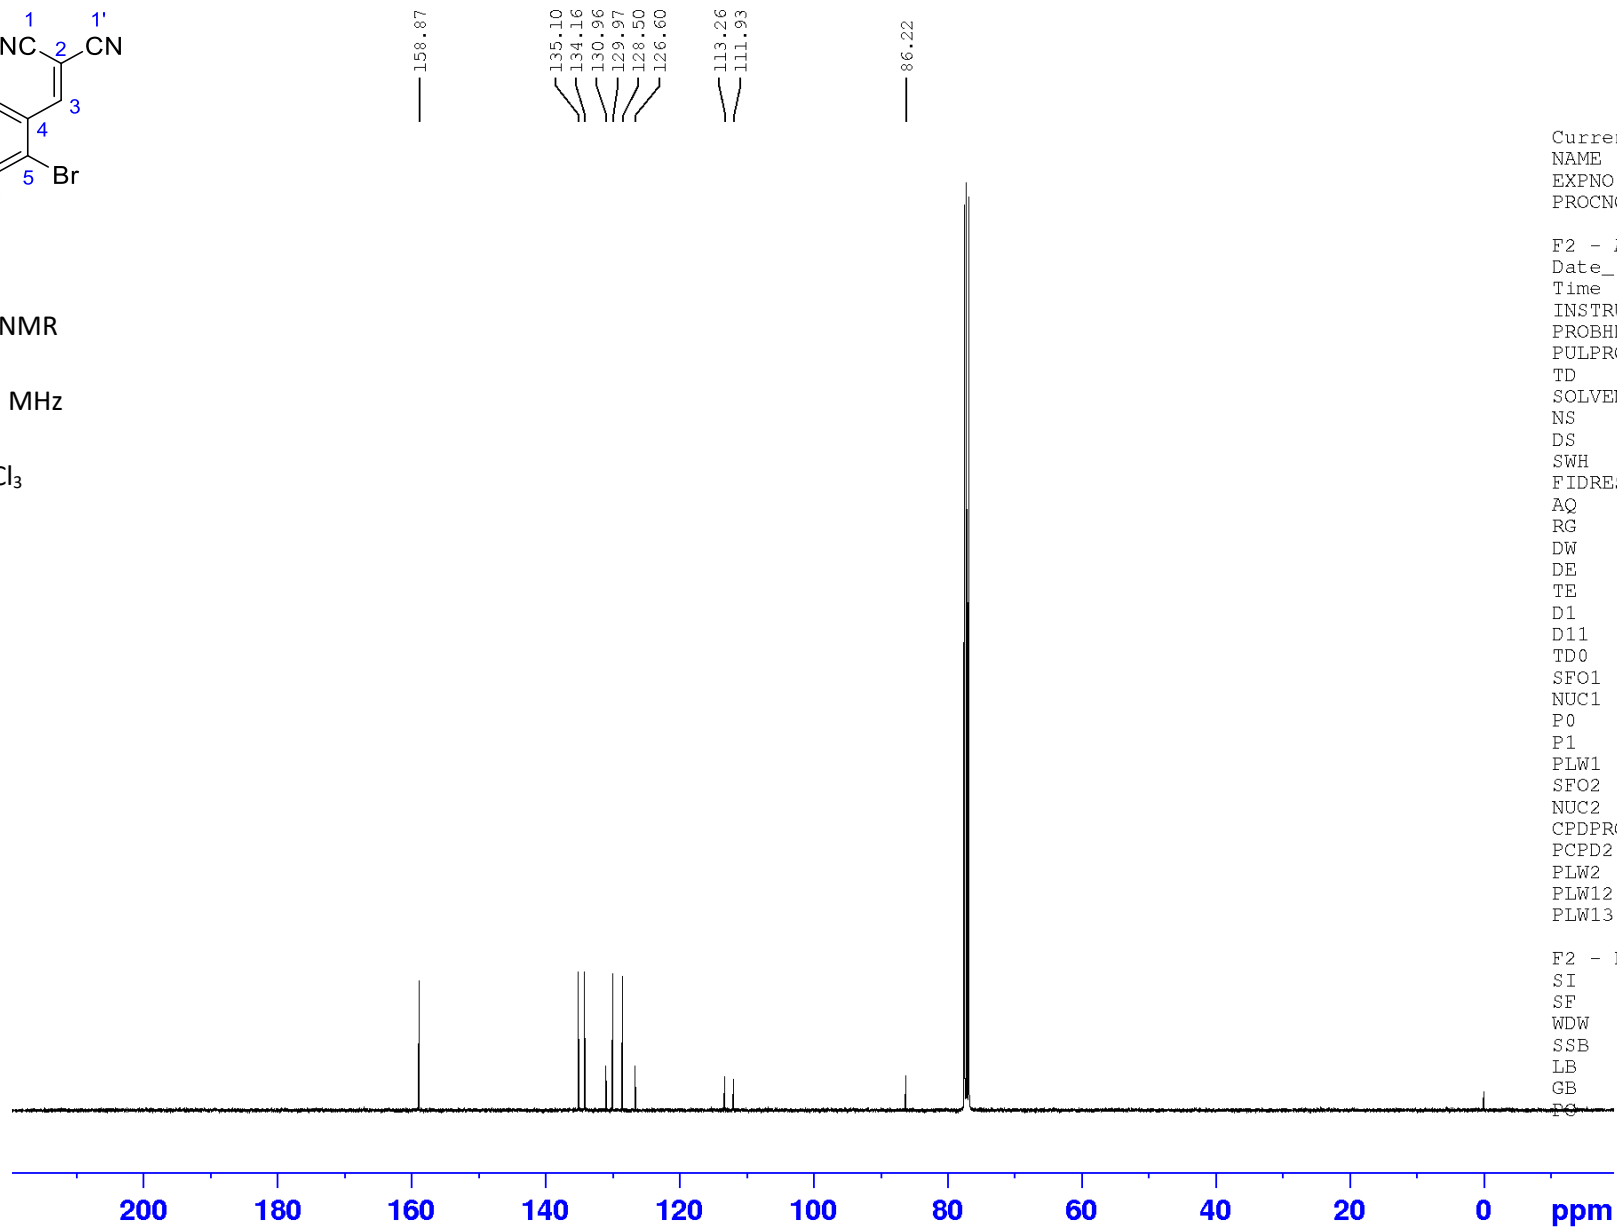

Current Data Parameters

NAME CAD-1-21  
EXPNO 13  
PROCNO 1

F2 - Acquisition Parameters

Date\_ 20200122  
Time 0.24 h  
INSTRUM AVIII\_400  
PROBHD Z108618\_0146 (  
PULPROG zgpg30  
TD 96150  
SOLVENT CDC13  
NS 4096  
DS 4  
SWH 24038.461 Hz  
FIDRES 0.500020 Hz  
AQ 1.9999200 sec  
RG 1620  
DW 20.800 usec  
DE 6.50 usec  
TE 300.0 K  
D1 1.00000000 sec  
D11 0.03000000 sec  
TD0 1  
SFO1 100.6178003 MHz  
NUC1 13C  
P0 3.00 usec  
P1 9.00 usec  
PLW1 96.68000031 W  
SFO2 400.1116004 MHz  
NUC2 1H  
PCPD2 waltz64  
PCPD2 90.00 usec  
PLW2 17.29199982 W  
PLW12 0.48032999 W  
PLW13 0.24160001 W

F2 - Processing parameters

SI 131072  
SF 100.6077258 MHz  
WDW EM  
SSB 0  
LB 1.00 Hz  
GB 0  
PC 1.40

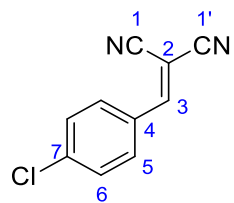

2g

$^1\text{H}$  NMR

400 MHz

$\text{CDCl}_3$

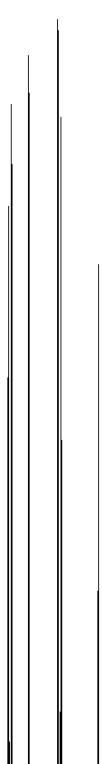

Current Data Parameters  
NAME CAD-1-18  
EXPNO 10  
PROCNO 1

F2 - Acquisition Parameters  
Date\_ 20200120  
Time 15.31 h  
INSTRUM AVIII\_400  
PROBHD Z108618\_0146 (  
PULPROG zg30  
TD 65536  
SOLVENT  $\text{CDCl}_3$   
NS 32  
DS 2  
SWH 8223.685 Hz  
FIDRES 0.250967 Hz  
AQ 3.9845889 sec  
RG 256  
DW 60.800 usec  
DE 17.42 usec  
TE 300.0 K  
D1 1.00000000 sec  
TD0 1  
SFO1 400.1124708 MHz  
NUC1  $^1\text{H}$   
P0 5.00 usec  
P1 15.00 usec  
PLW1 17.29199982 W

F2 - Processing parameters  
SI 32768

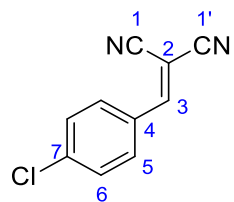

2g

<sup>1</sup>H NMR

400 MHz

CDCl<sub>3</sub>

Current Data Parameters  
 NAME CAD-1-18  
 EXPNO 10  
 PROCNO 1

F2 - Acquisition Parameters  
 Date\_ 20200120  
 Time 15.31 h  
 INSTRUM AVIII\_400  
 PROBHD Z108618\_0146 {  
 PULPROG zg30  
 TD 65536  
 SOLVENT CDC13  
 NS 32  
 DS 2  
 SWH 8223.685 Hz  
 FIDRES 0.250967 Hz  
 AQ 3.9845889 sec  
 RG 256  
 DW 60.800 usec  
 DE 17.42 usec  
 TE 300.0 K  
 D1 1.00000000 sec  
 TD0 1  
 SFO1 400.1124708 MHz  
 NUC1 1H  
 P0 5.00 usec  
 P1 15.00 usec  
 PLW1 17.29199982 W

F2 - Processing parameters  
 SI 32768  
 SF 400.1100098 MHz  
 WDW EM  
 SSB 0  
 LB 0.30 Hz  
 GB 0  
 PC 1.00

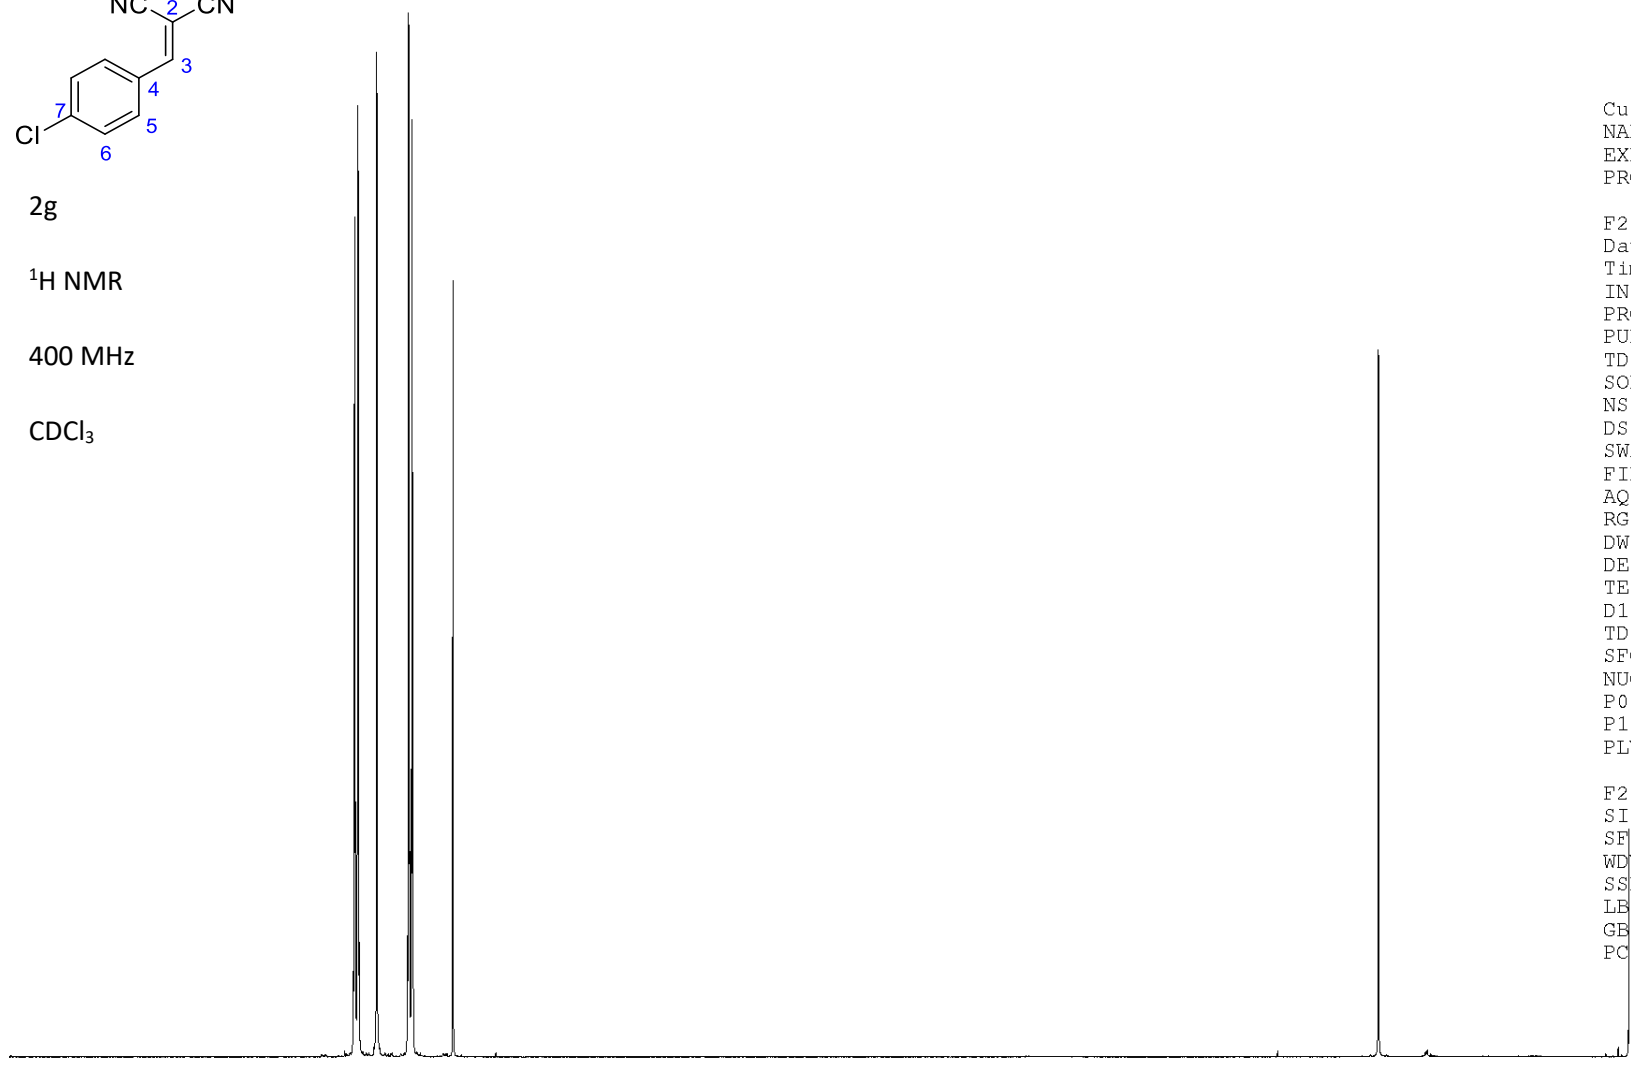

2.05  
1.00  
2.04



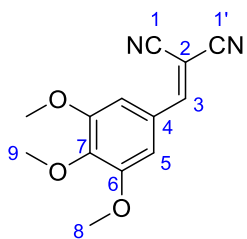

2h

<sup>1</sup>H NMR

400 MHz

CDCl<sub>3</sub>

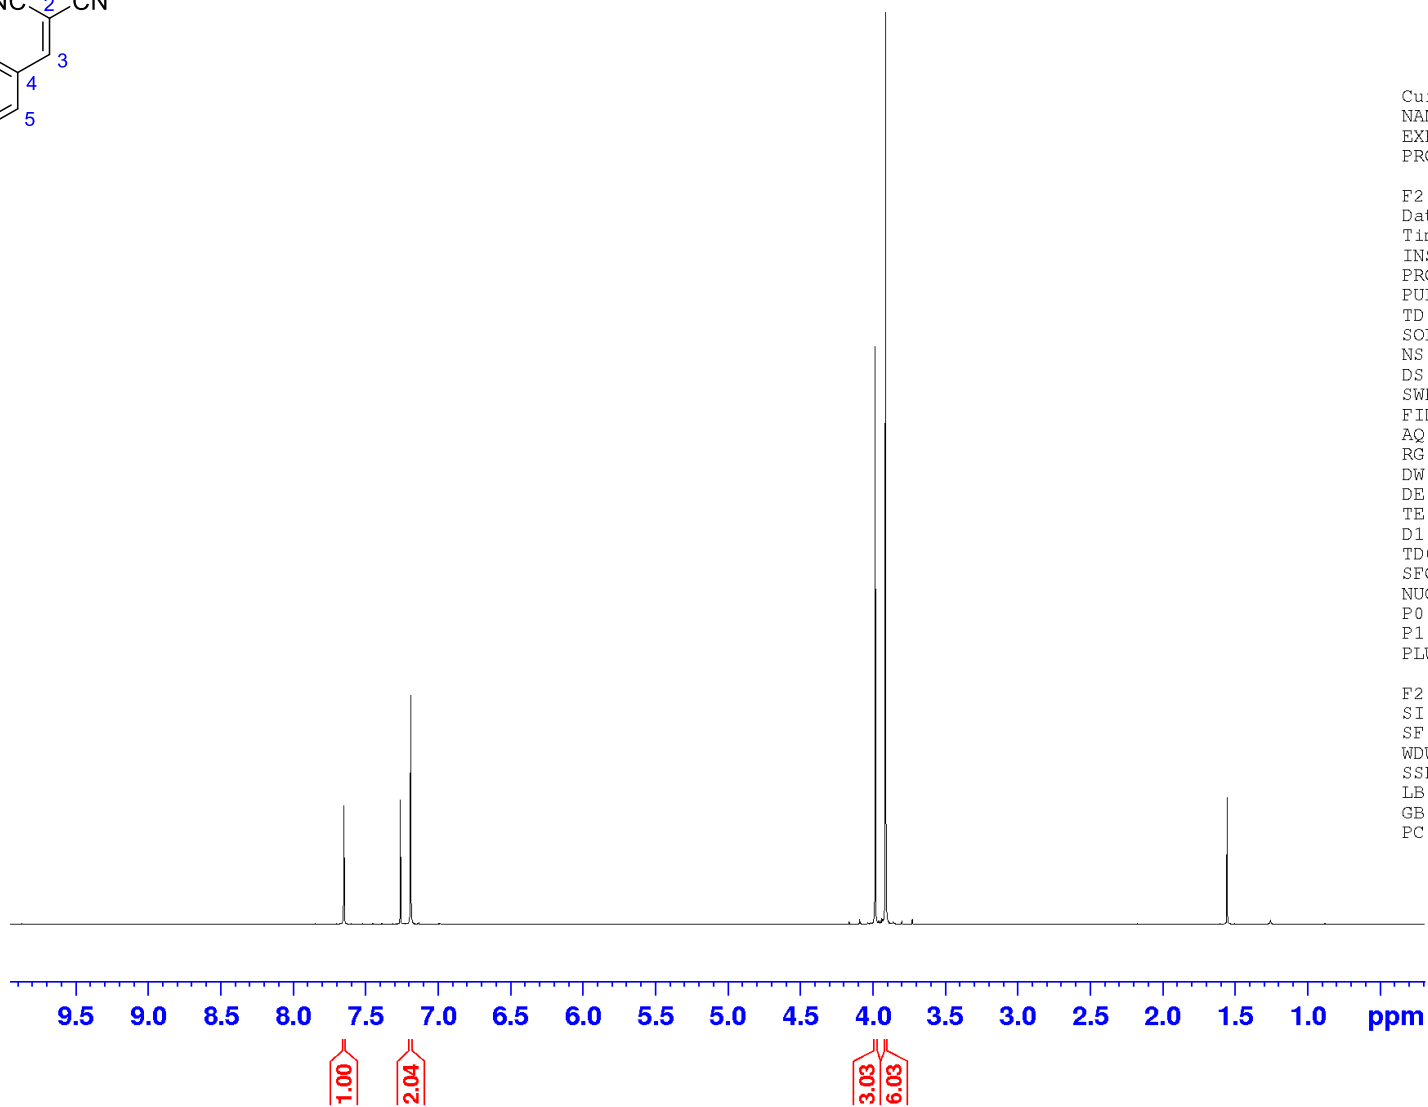

Current Data Parameters  
 NAME CAD-1-20  
 EXPNO 10  
 PROCNO 1

F2 - Acquisition Parameters  
 Date\_ 20200120  
 Time 17.23 h  
 INSTRUM AVIII\_400  
 PROBHD Z108618\_0146 (  
 PULPROG zg30  
 TD 65536  
 SOLVENT CDCl3  
 NS 32  
 DS 2  
 SWH 8223.685 Hz  
 FIDRES 0.250967 Hz  
 AQ 3.9845889 sec  
 RG 256  
 DW 60.800 usec  
 DE 17.42 usec  
 TE 300.0 K  
 D1 1.00000000 sec  
 TD0 1  
 SFO1 400.1124708 MHz  
 NUC1 1H  
 P0 5.00 usec  
 P1 15.00 usec  
 PLW1 17.29199982 W

F2 - Processing parameters  
 SI 32768  
 SF 400.1100098 MHz  
 WDW EM  
 SSB 0  
 LB 0.30 Hz  
 GB 0  
 PC 1.00

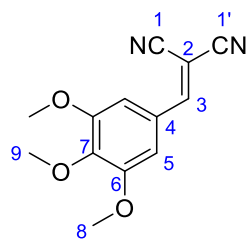

2h

<sup>13</sup>C NMR

101 MHz

CDCl<sub>3</sub>

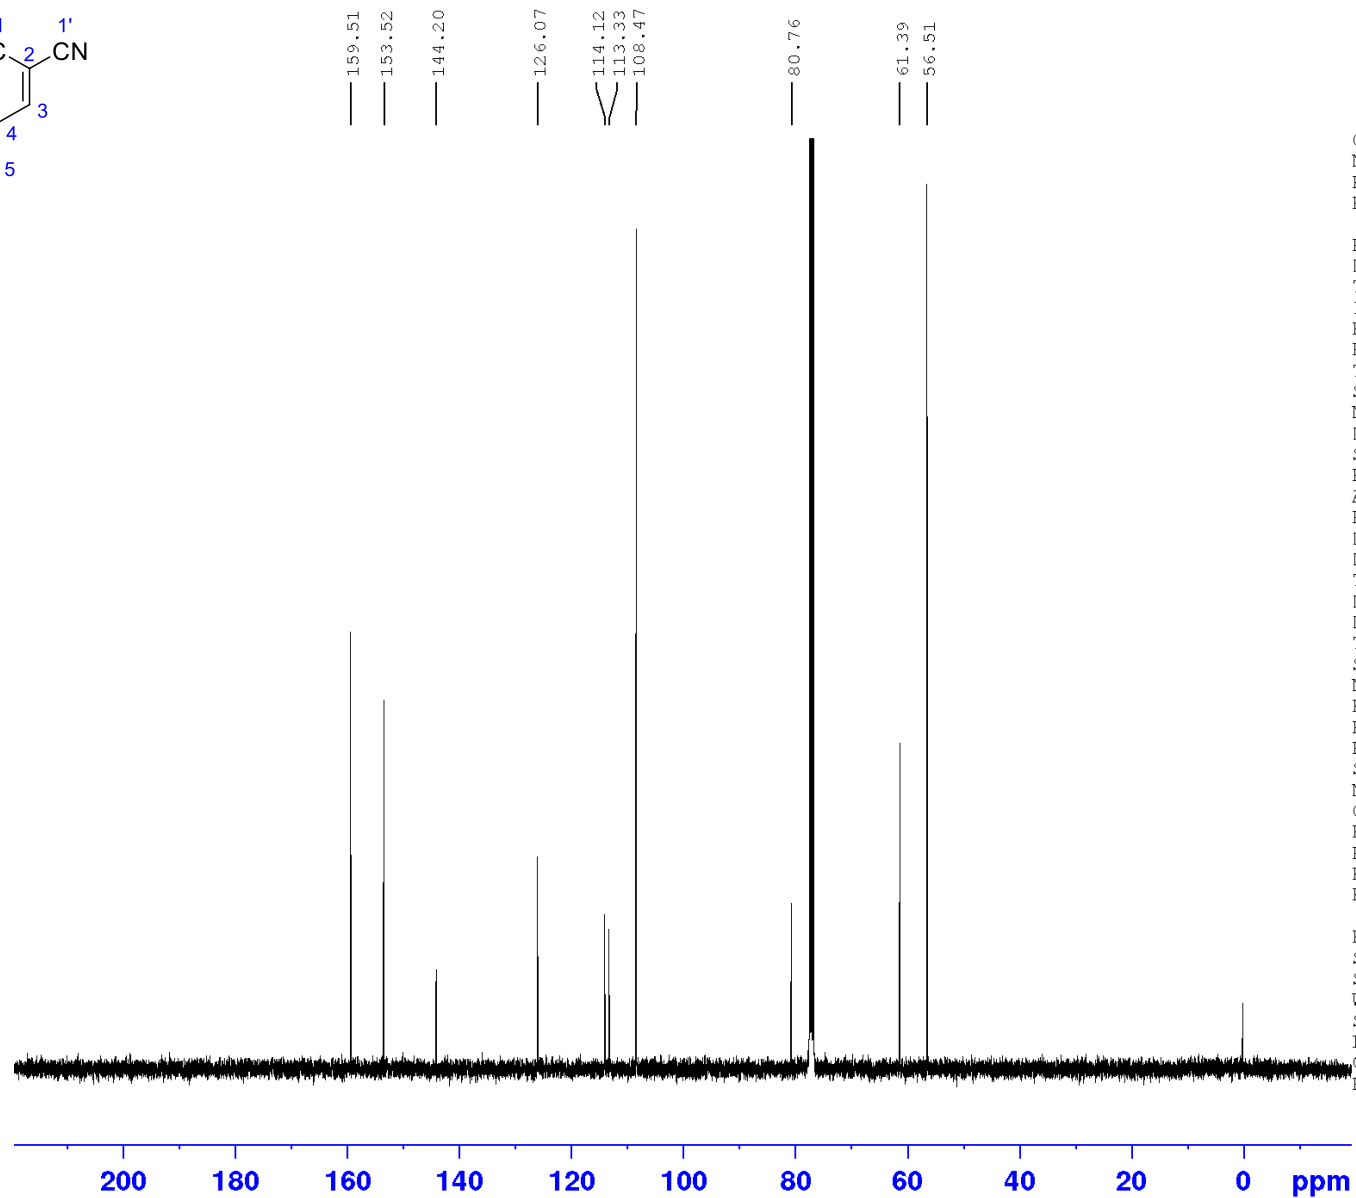

Current Data Parameters  
 NAME CAD-1-20  
 EXPNO 13  
 PROCNO 1

F2 - Acquisition Parameters  
 Date\_ 20200121  
 Time 4.28 h  
 INSTRUM AVIII\_400  
 PROBHD Z108618\_0146 (  
 PULPROG zgpg30  
 TD 96150  
 SOLVENT CDCl3  
 NS 2048  
 DS 4  
 SWH 24038.461 Hz  
 FIDRES 0.500020 Hz  
 AQ 1.9999200 sec  
 RG 2050  
 DW 20.800 usec  
 DE 6.50 usec  
 TE 300.0 K  
 D1 1.00000000 sec  
 D11 0.03000000 sec  
 TD0 1  
 SFO1 100.6178003 MHz  
 NUC1 13C  
 P0 3.00 usec  
 P1 9.00 usec  
 PLW1 96.68000031 W  
 SFO2 400.1116004 MHz  
 NUC2 1H  
 CPDPRG[2] waltz64  
 PCPD2 90.00 usec  
 PLW2 17.29199982 W  
 PLW12 0.48032999 W  
 PLW13 0.24160001 W

F2 - Processing parameters  
 SI 131072  
 SF 100.6077272 MHz  
 WDW EM  
 SSB 0  
 LB 1.00 Hz  
 GB 0  
 PC 1.40

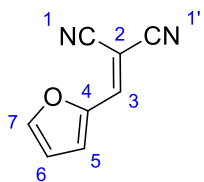

2i

<sup>1</sup>H NMR

400 MHz

CDCl<sub>3</sub>

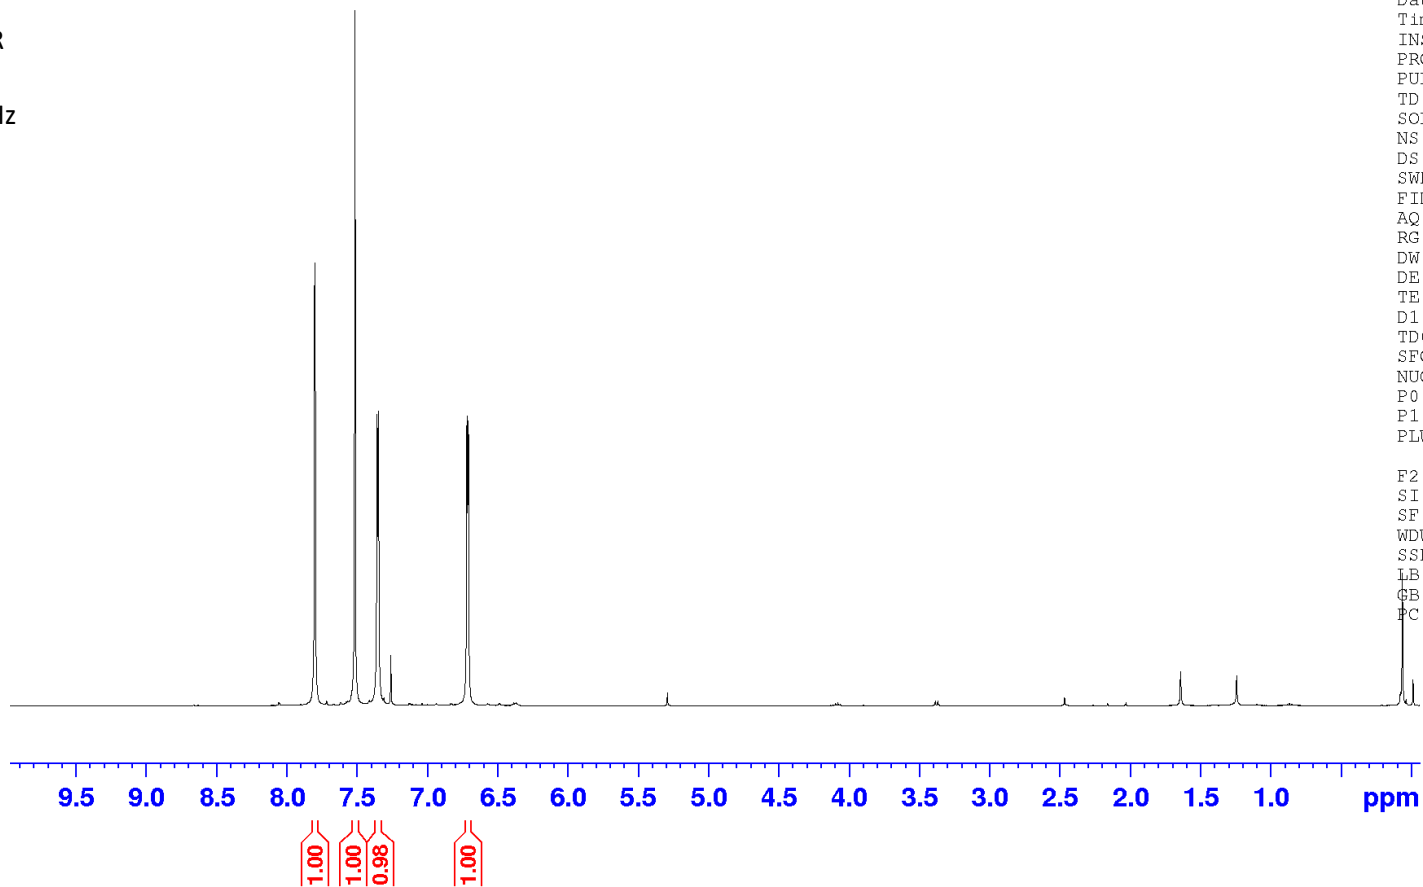

Current Data Parameters  
 NAME WR 2.153 (Col)  
 EXPNO 10  
 PROCNO 1

F2 - Acquisition Parameters  
 Date\_ 20210428  
 Time 15.00 h  
 INSTRUM AVIII\_400  
 PROBHD Z108618\_0146 ( )  
 PULPROG zg30  
 TD 65536  
 SOLVENT CDCl3  
 NS 16  
 DS 2  
 SWH 8223.685 Hz  
 FIDRES 0.250967 Hz  
 AQ 3.9845889 sec  
 RG 128  
 DW 60.800 usec  
 DE 17.42 usec  
 TE 300.0 K  
 D1 1.00000000 sec  
 TD0 1  
 SFO1 400.1124708 MHz  
 NUC1 1H  
 P0 5.00 usec  
 P1 15.00 usec  
 PLW1 17.29199982 W

F2 - Processing parameters  
 SI 32768  
 SF 400.1100096 MHz  
 WDW EM  
 SSB 0  
 LB 0.30 Hz  
 GB 0  
 FC 1.00

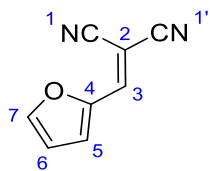

2i

<sup>13</sup>C NMR

101 MHz

CDCl<sub>3</sub>

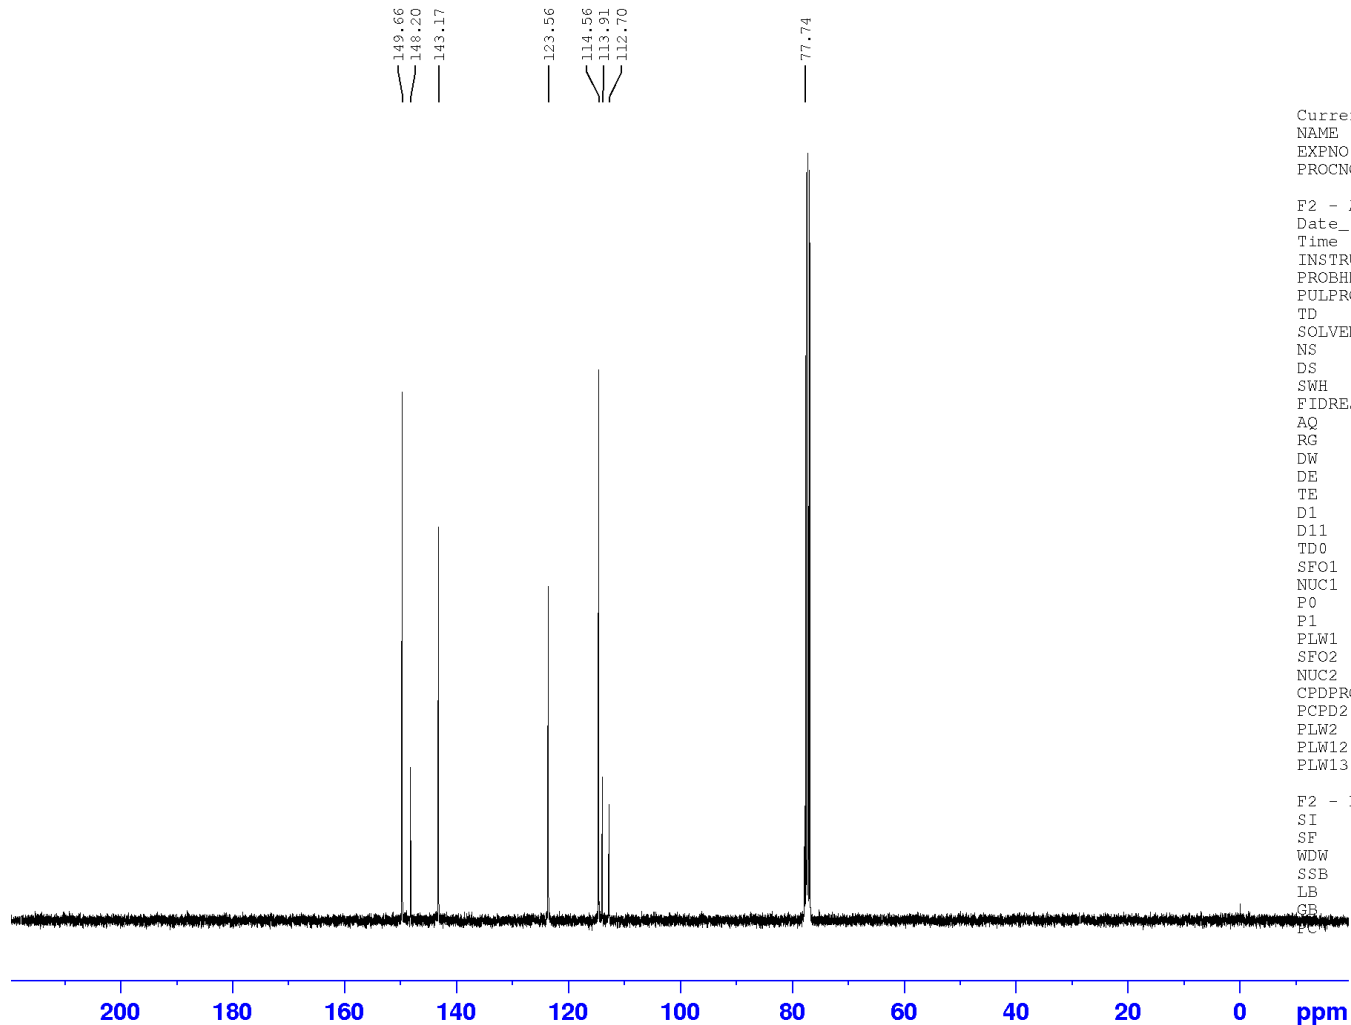

Current Data Parameters  
 NAME WR 2.153  
 EXPNO 21  
 PROCNO 1

F2 - Acquisition Parameters  
 Date\_ 20210427  
 Time 1.21 h  
 INSTRUM AVIII\_400  
 PROBHD Z108618\_0146 (  
 PULPROG zgpg30  
 TD 96150  
 SOLVENT CDC13  
 NS 1024  
 DS 4  
 SWH 24038.461 Hz  
 FIDRES 0.500020 Hz  
 AQ 1.9999200 sec  
 RG 2050  
 DW 20.800 usec  
 DE 6.50 usec  
 TE 300.0 K  
 D1 1.00000000 sec  
 D11 0.03000000 sec  
 TD0 1  
 SFO1 100.6178003 MHz  
 NUC1 13C  
 P0 3.00 usec  
 P1 9.00 usec  
 PLW1 96.68000031 W  
 SFO2 400.1116004 MHz  
 NUC2 1H  
 CPDPRG[2] waltz64  
 PCPD2 90.00 usec  
 PLW2 17.29199982 W  
 PLW12 0.48032999 W  
 PLW13 0.24160001 W

F2 - Processing parameters  
 SI 131072  
 SF 100.6077306 MHz  
 WDW EM  
 SSB 0  
 LB 1.00 Hz  
 GB 0  
 PC 1.40

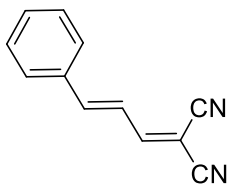

2i

<sup>1</sup>H NMR

400 MHz

CDCl<sub>3</sub>

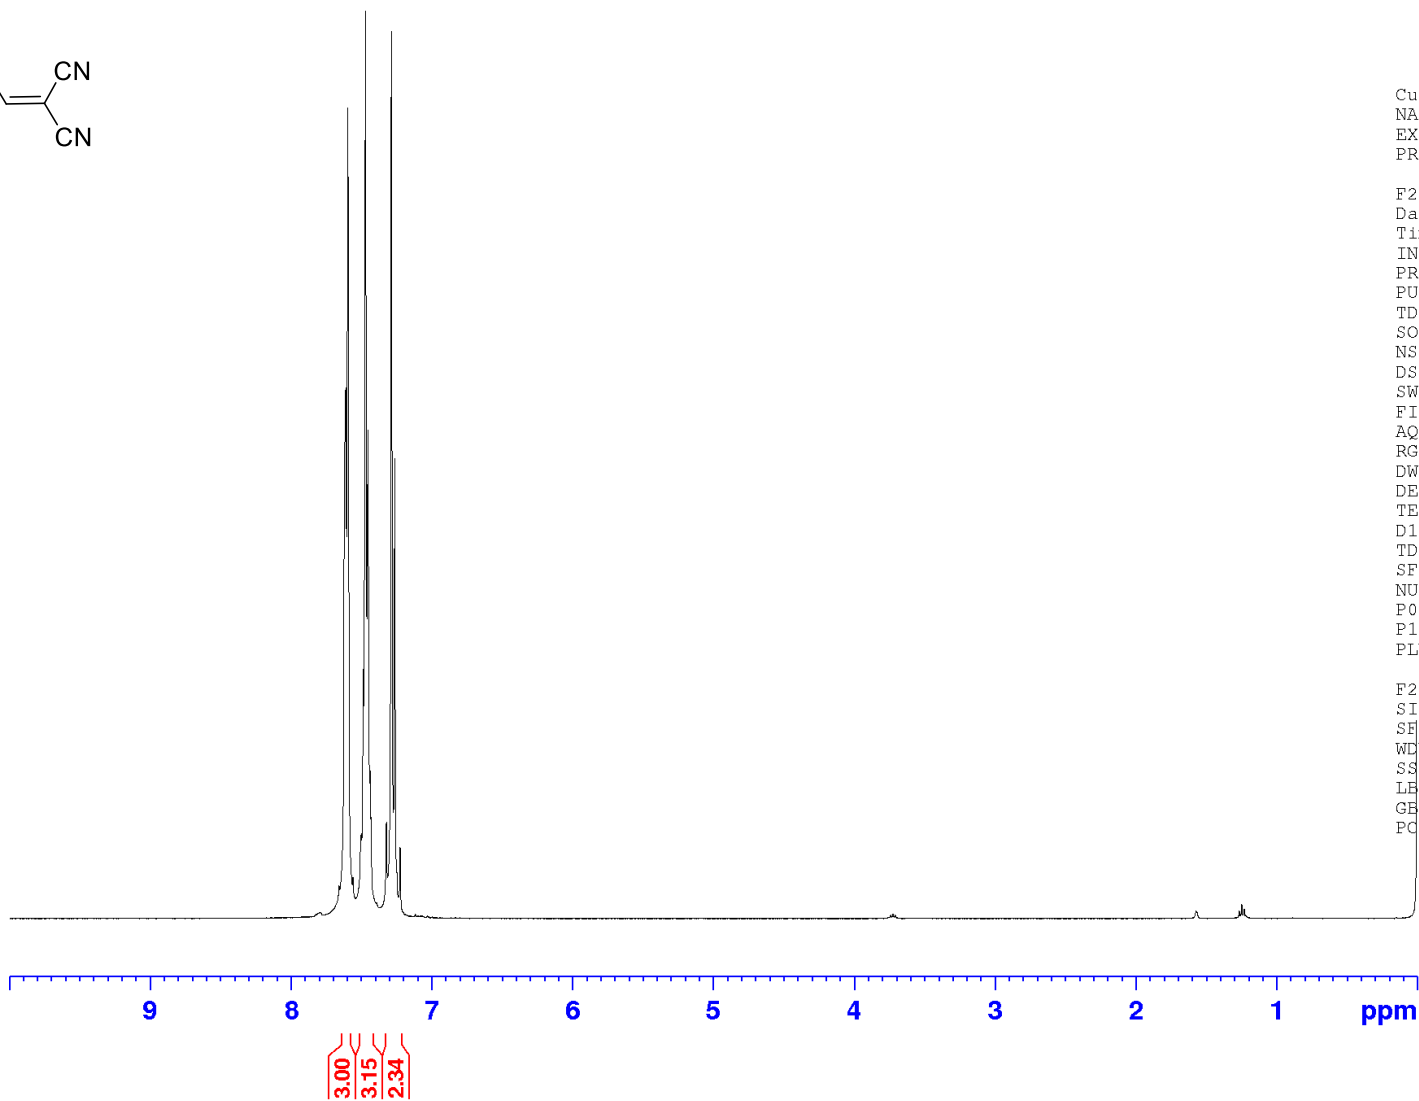

Current Data Parameters  
NAME WR 2.154  
EXPNO 10  
PROCNO 1

F2 - Acquisition Parameters  
Date\_ 20210426  
Time 12.11 h  
INSTRUM AVIII\_400  
PROBHD Z108618\_0146 (  
PULPROG zg30  
TD 65536  
SOLVENT CDCl3  
NS 16  
DS 2  
SWH 8223.685 Hz  
FIDRES 0.250967 Hz  
AQ 3.9845889 sec  
RG 256  
DW 60.800 usec  
DE 17.42 usec  
TE 300.0 K  
D1 1.00000000 sec  
TD0 1  
SFO1 400.1124708 MHz  
NUC1 1H  
P0 5.00 usec  
P1 15.00 usec  
PLW1 17.29199982 W

F2 - Processing parameters  
SI 32768  
SF 400.1100107 MHz  
WDW EM  
SSB 0  
LB 0.30 Hz  
GB 0  
PC 1.00

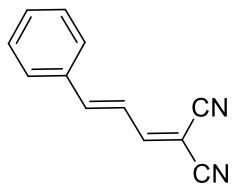

2j

<sup>13</sup>C NMR

101 MHz

CDCl<sub>3</sub>

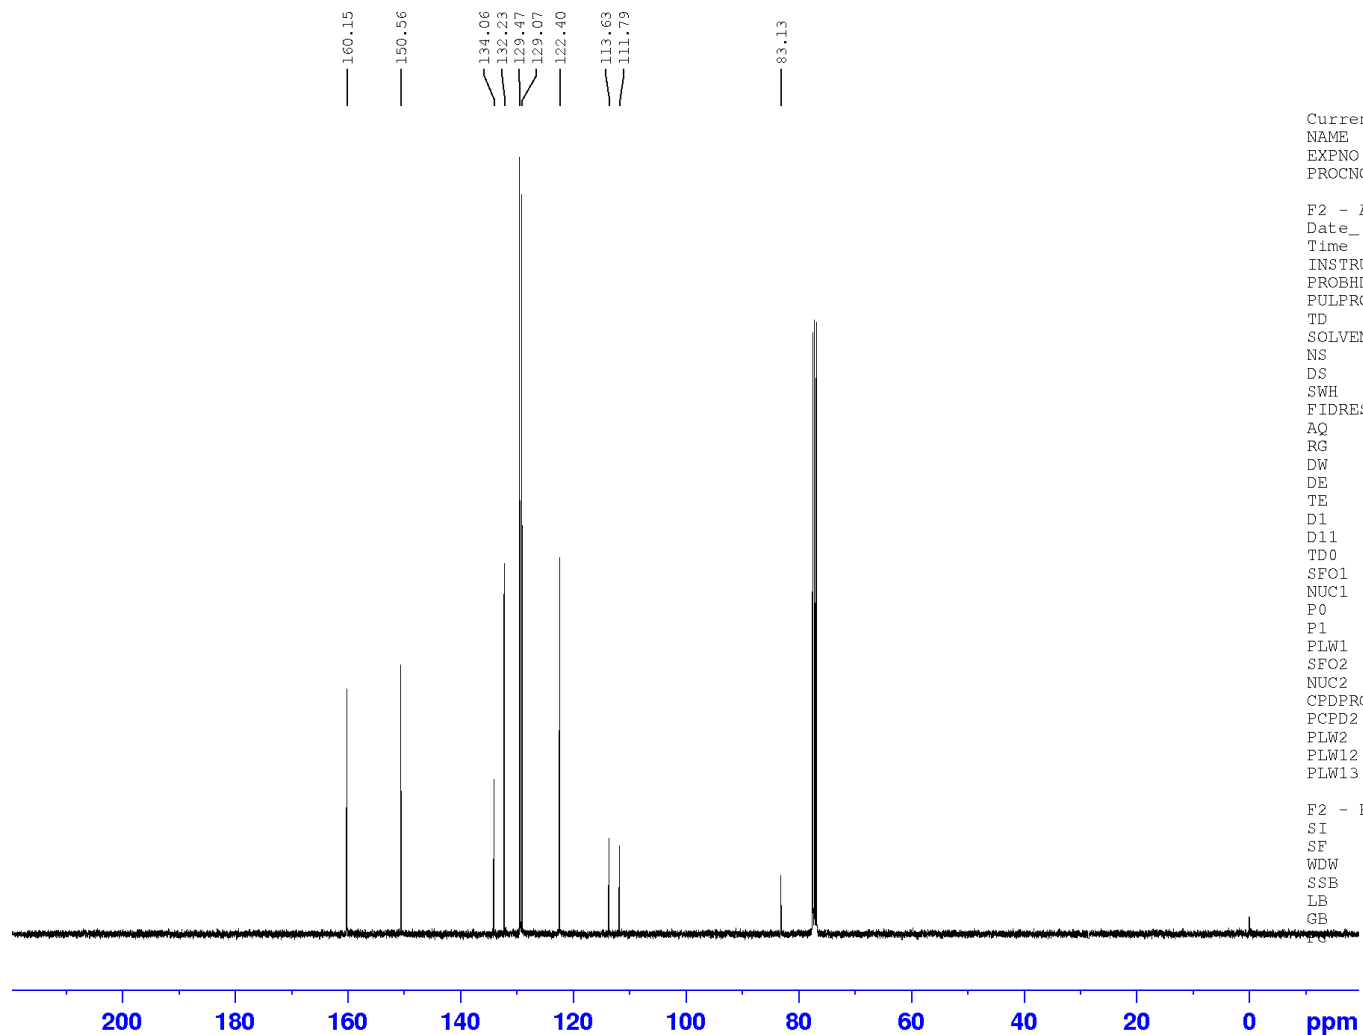

Current Data Parameters  
 NAME WR 2.154  
 EXPNO 11  
 PROCNO 1

F2 - Acquisition Parameters  
 Date\_ 20210427  
 Time 2.34 h  
 INSTRUM AVIII\_400  
 PROBHD Z108618\_0146 (  
 PULPROG zgpg30  
 TD 96150  
 SOLVENT CDCl3  
 NS 1024  
 DS 4  
 SWH 24038.461 Hz  
 FIDRES 0.500020 Hz  
 AQ 1.9999200 sec  
 RG 2050  
 DW 20.800 usec  
 DE 6.50 usec  
 TE 300.0 K  
 D1 1.0000000 sec  
 D11 0.0300000 sec  
 TD0 1  
 SFO1 100.6178003 MHz  
 NUC1 13C  
 P0 3.00 usec  
 P1 9.00 usec  
 PLW1 96.68000031 W  
 SFO2 400.1116004 MHz  
 NUC2 1H  
 CPDPRG[2] waltz64  
 PCPD2 90.00 usec  
 PLW2 17.29199982 W  
 PLW12 0.48032999 W  
 PLW13 0.24160001 W

F2 - Processing parameters  
 SI 131072  
 SF 100.6077298 MHz  
 WDW EM  
 SSB 0  
 LB 1.00 Hz  
 GB 0  
 PC 1.40

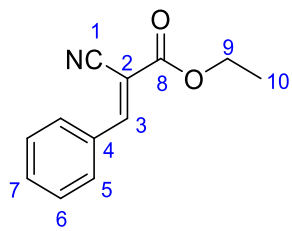

2l

<sup>1</sup>H NMR

400 MHz

CDCl<sub>3</sub>

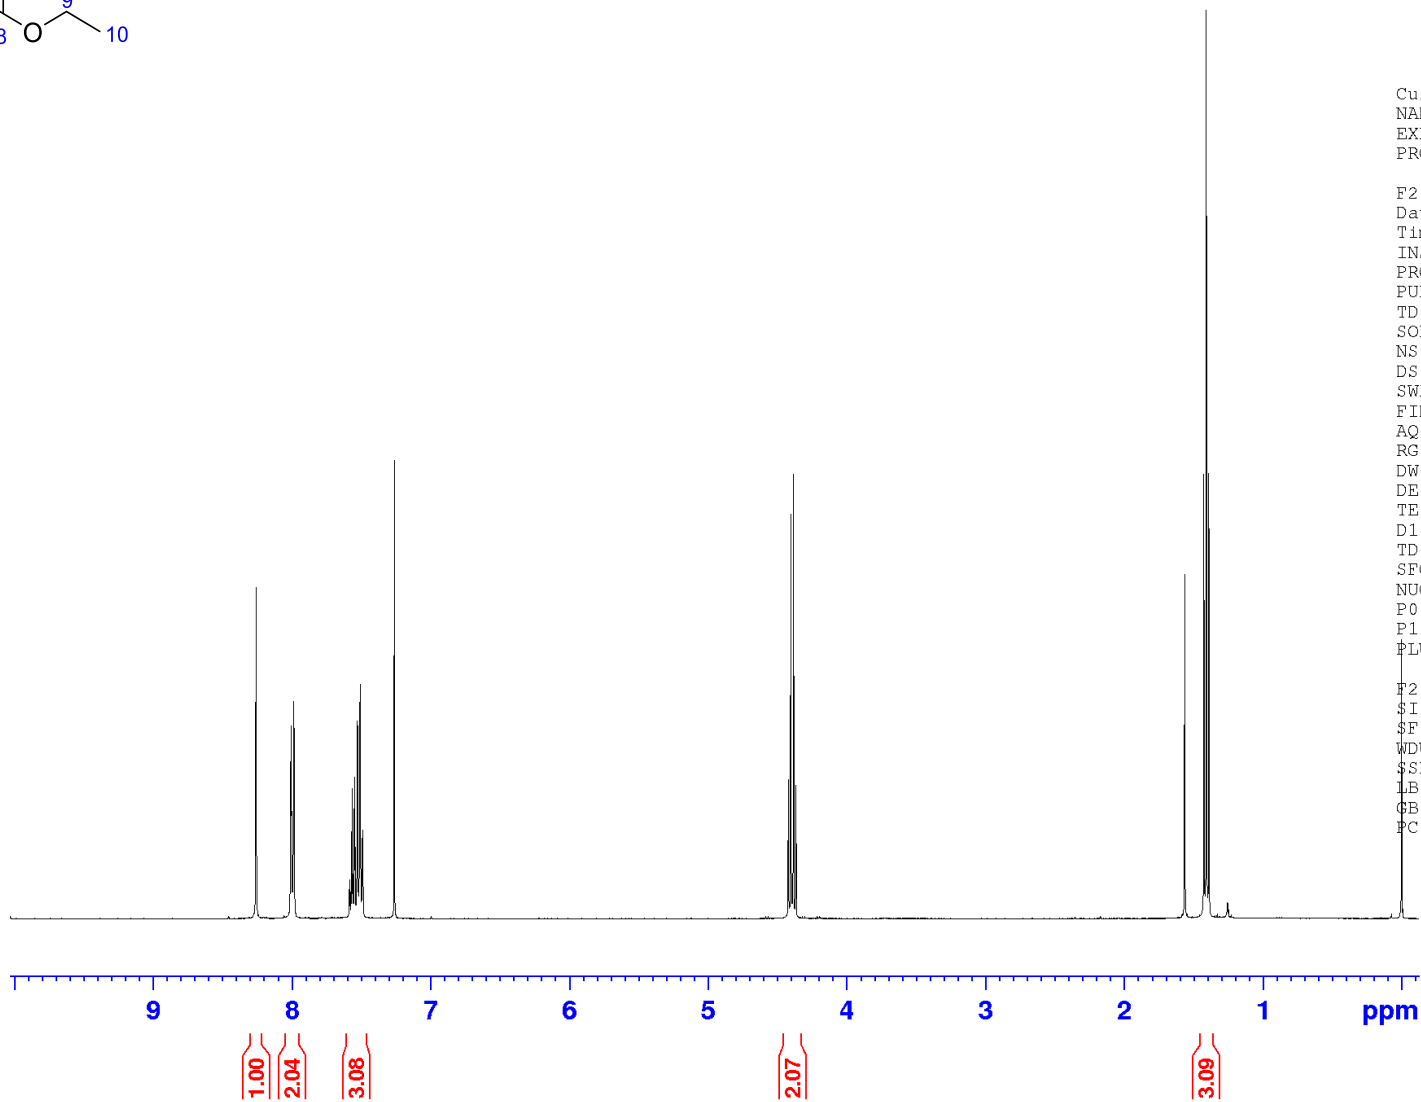

Current Data Parameters  
 NAME CAD-1-22 spot 1  
 EXPNO 11  
 PROCNO 1

F2 - Acquisition Parameters  
 Date\_ 20200204  
 Time 17.02 h  
 INSTRUM AVIII\_400  
 PROBHD Z108618\_0146 (  
 PULPROG zg30  
 TD 65536  
 SOLVENT CDCl3  
 NS 32  
 DS 2  
 SWH 8223.685 Hz  
 FIDRES 0.250967 Hz  
 AQ 3.9845889 sec  
 RG 256  
 DW 60.800 usec  
 DE 17.42 usec  
 TE 300.0 K  
 D1 1.00000000 sec  
 TD0 1  
 SFO1 400.1124708 MHz  
 NUC1 1H  
 P0 5.00 usec  
 P1 15.00 usec  
 PLW1 17.29199982 W

F2 - Processing parameters  
 \$I 32768  
 \$F 400.1100090 MHz  
 WDW EM  
 \$SB 0  
 LB 0.30 Hz  
 GB 0  
 PC 1.00



2I

<sup>13</sup>C NMR

101 MHz

CDCl<sub>3</sub>

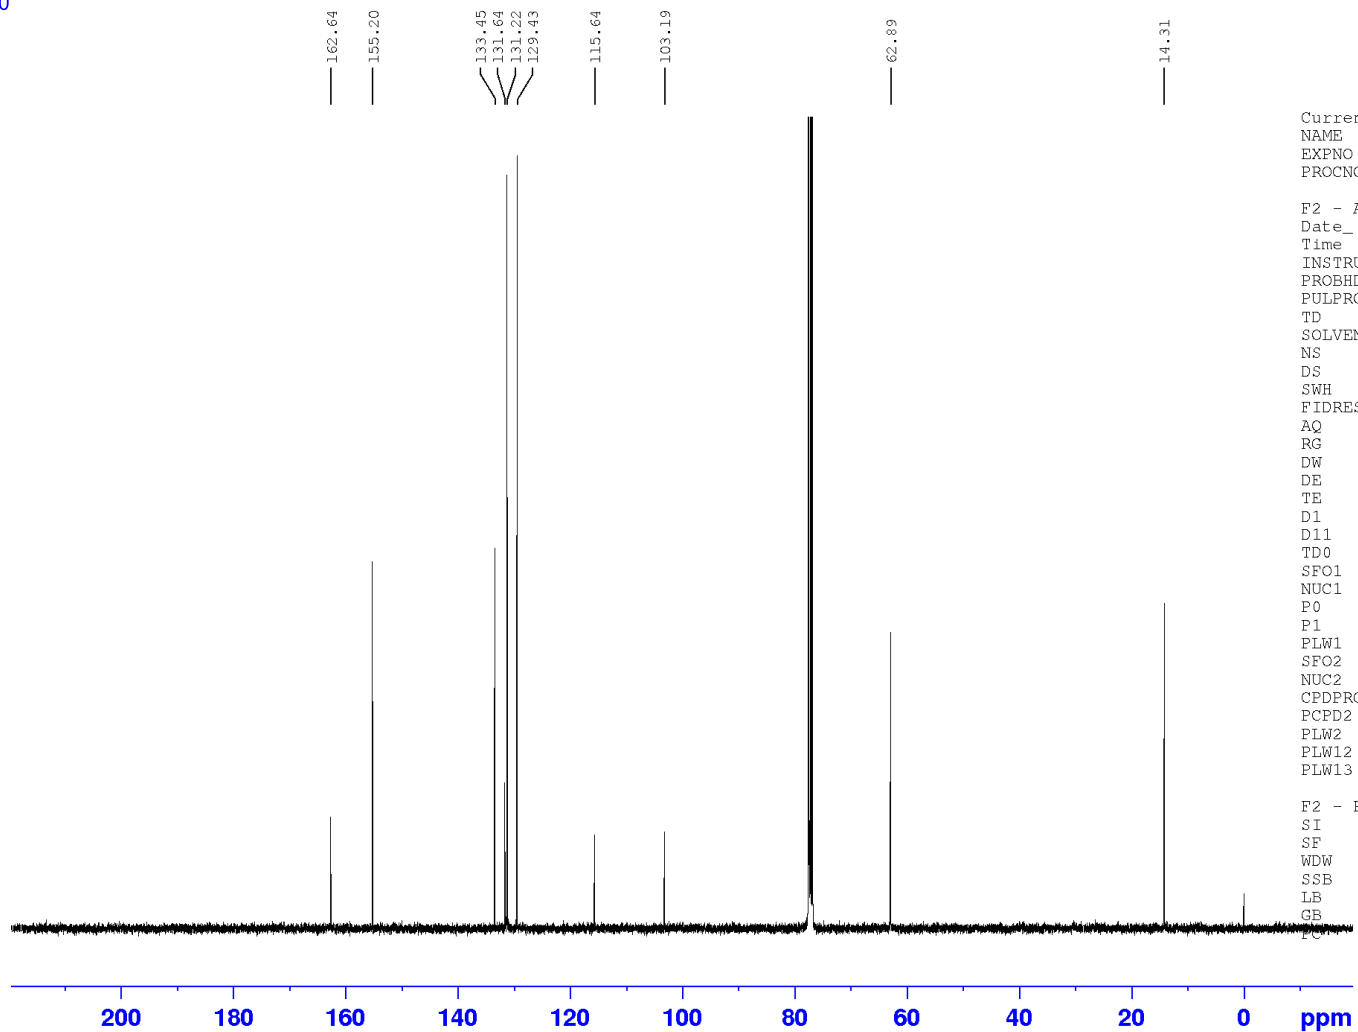

Current Data Parameters  
 NAME CAD-1-22 spot 1  
 EXPNO 14  
 PROCNO 1

F2 - Acquisition Parameters  
 Date\_ 20200205  
 Time 23.24 h  
 INSTRUM AVIII\_400  
 PROBHD Z108618\_0146 ( )  
 PULPROG zgpg30  
 TD 96150  
 SOLVENT CDCl3  
 NS 4096  
 DS 4  
 SWH 24038.461 Hz  
 FIDRES 0.500020 Hz  
 AQ 1.9999200 sec  
 RG 1150  
 DW 20.800 usec  
 DE 6.50 usec  
 TE 300.0 K  
 D1 1.0000000 sec  
 D11 0.0300000 sec  
 TD0 1  
 SFO1 100.6178003 MHz  
 NUC1 13C  
 P0 3.00 usec  
 P1 9.00 usec  
 PLW1 96.68000031 W  
 SFO2 400.1116004 MHz  
 NUC2 1H  
 CPDPRG[2] waltz64  
 PCPD2 90.00 usec  
 PLW2 17.29199982 W  
 PLW12 0.48032999 W  
 PLW13 0.24160001 W

F2 - Processing parameters  
 SI 131072  
 SF 100.6077262 MHz  
 WDW EM  
 SSB 0  
 LB 1.00 Hz  
 GB 0  
 PC 1.40



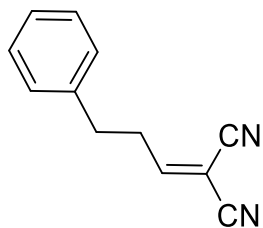

2o

<sup>1</sup>H NMR

400 MHz

CDCl<sub>3</sub>

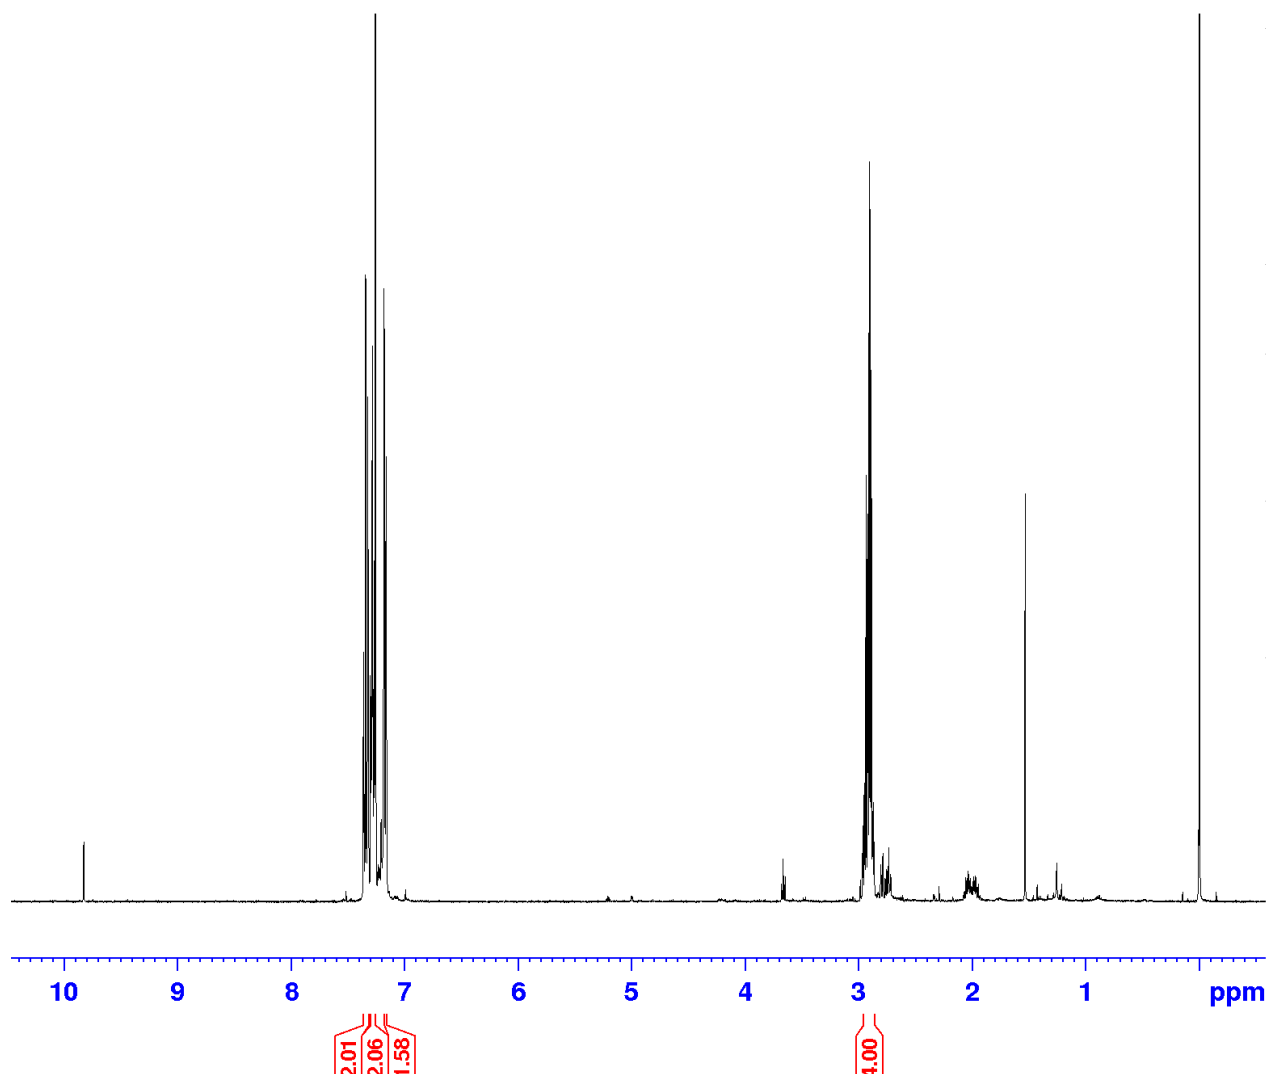

Current Data Parameters  
NAME WR 2.225 F1  
EXPNO 10  
PROCNO 1

F2 - Acquisition Parameters  
Date\_ 20210930  
Time 17.24 h  
INSTRUM AVIII\_400  
PROBHD Z108618\_0146 (   
PULPROG zg30  
TD 65536  
SOLVENT CDCl3  
NS 16  
DS 2  
SWH 8223.685 Hz  
FIDRES 0.250967 Hz  
AQ 3.9845889 sec  
RG 256  
DW 60.800 usec  
DE 17.42 usec  
TE 300.0 K  
D1 1.00000000 sec  
TD0 1  
SFO1 400.1124708 MHz  
NUC1 1H  
P0 5.00 usec  
P1 15.00 usec  
PLW1 17.29199982 W

F2 - Processing parameters  
SI 32768  
SF 400.1100101 MHz  
WDW EM  
SSB 0  
LB 0.30 Hz  
GB 0  
PC 1.00

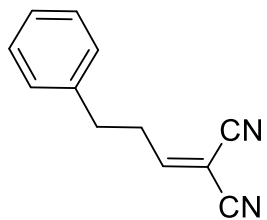

2o

<sup>13</sup>C NMR

101 MHz

CDCl<sub>3</sub>

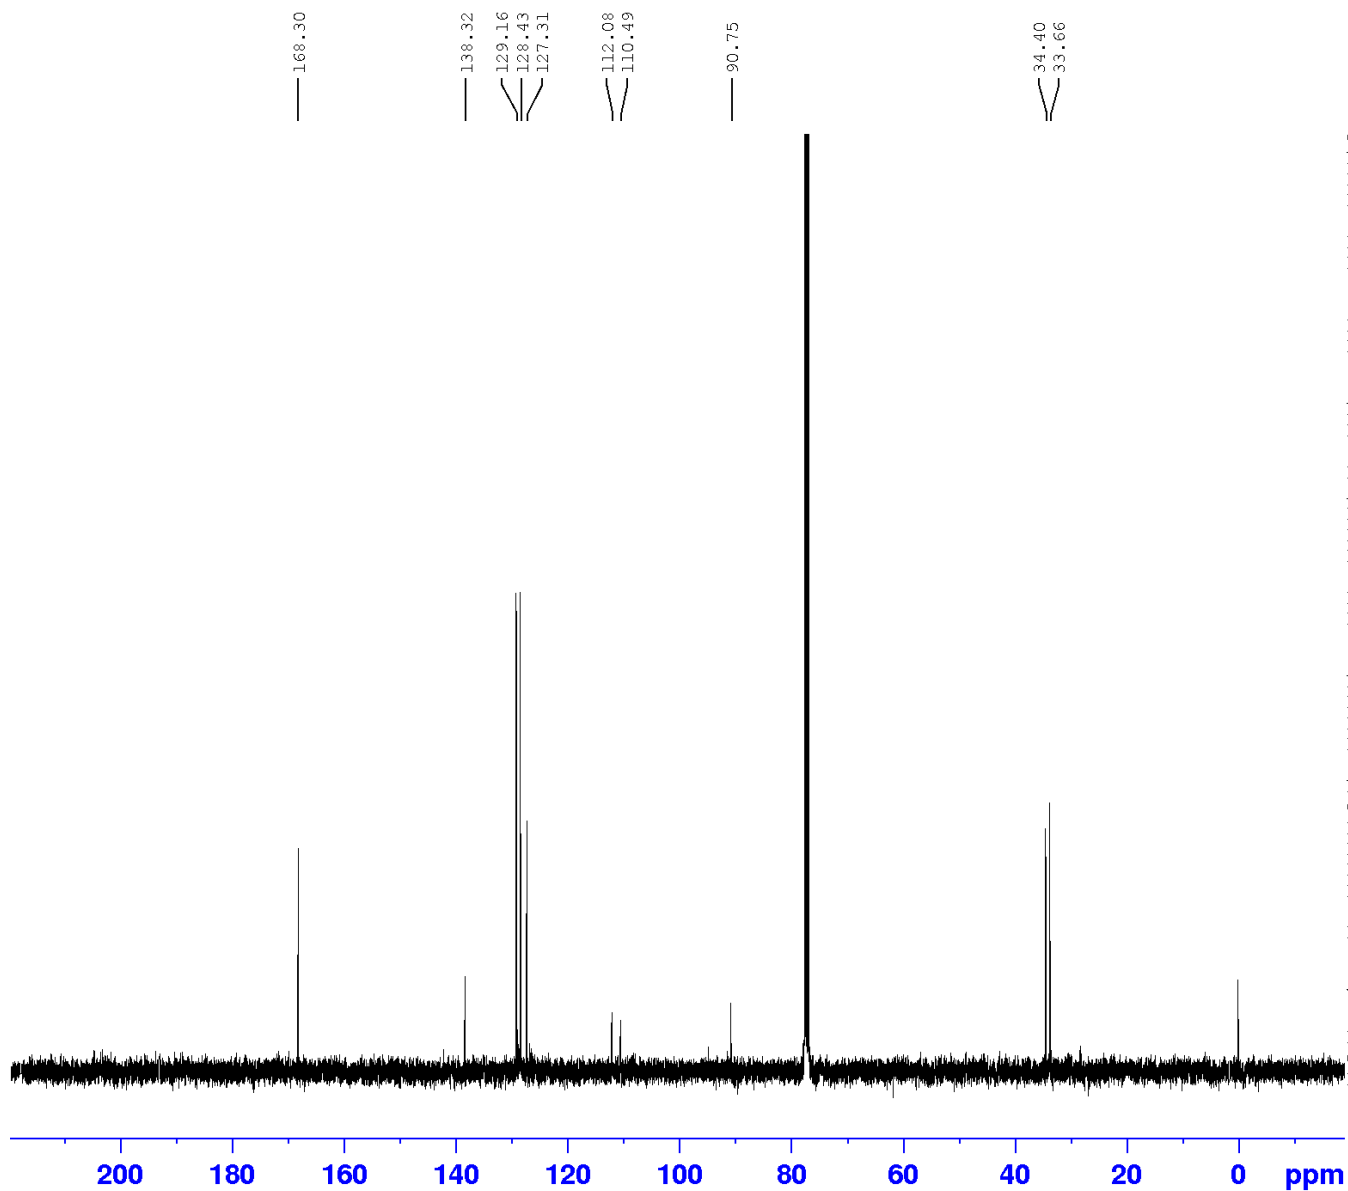

Current Data Parameters  
NAME WR 2.225 F1  
EXPNO 11  
PROCNO 1

F2 - Acquisition Parameters  
Date\_ 20210930  
Time 19.50 h  
INSTRUM AVIII\_400  
PROBHD Z108618\_0146 (  
PULPROG zgpg30  
TD 96150  
SOLVENT CDCl3  
NS 1024  
DS 4  
SWH 24038.461 Hz  
FIDRES 0.500020 Hz  
AQ 1.9999200 sec  
RG 2050  
DW 20.800 usec  
DE 6.50 usec  
TE 300.0 K  
D1 1.00000000 sec  
D11 0.03000000 sec  
TD0 1  
SFO1 100.6178003 MHz  
NUC1 13C  
P0 3.00 usec  
P1 9.00 usec  
PLW1 96.68000031 W  
SFO2 400.1116004 MHz  
NUC2 1H  
CPDPRG[2] waltz64  
PCPD2 90.00 usec  
PLW2 17.29199982 W  
PLW12 0.48032999 W  
PLW13 0.24160001 W

F2 - Processing parameters  
SI 131072  
SF 100.6077244 MHz  
WDW EM  
SSB 0  
LB 1.00 Hz  
GB 0  
PC 1.40

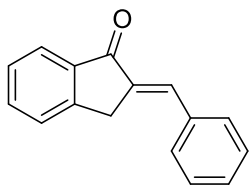

4a

<sup>1</sup>H NMR

400 MHz

CDCl<sub>3</sub>

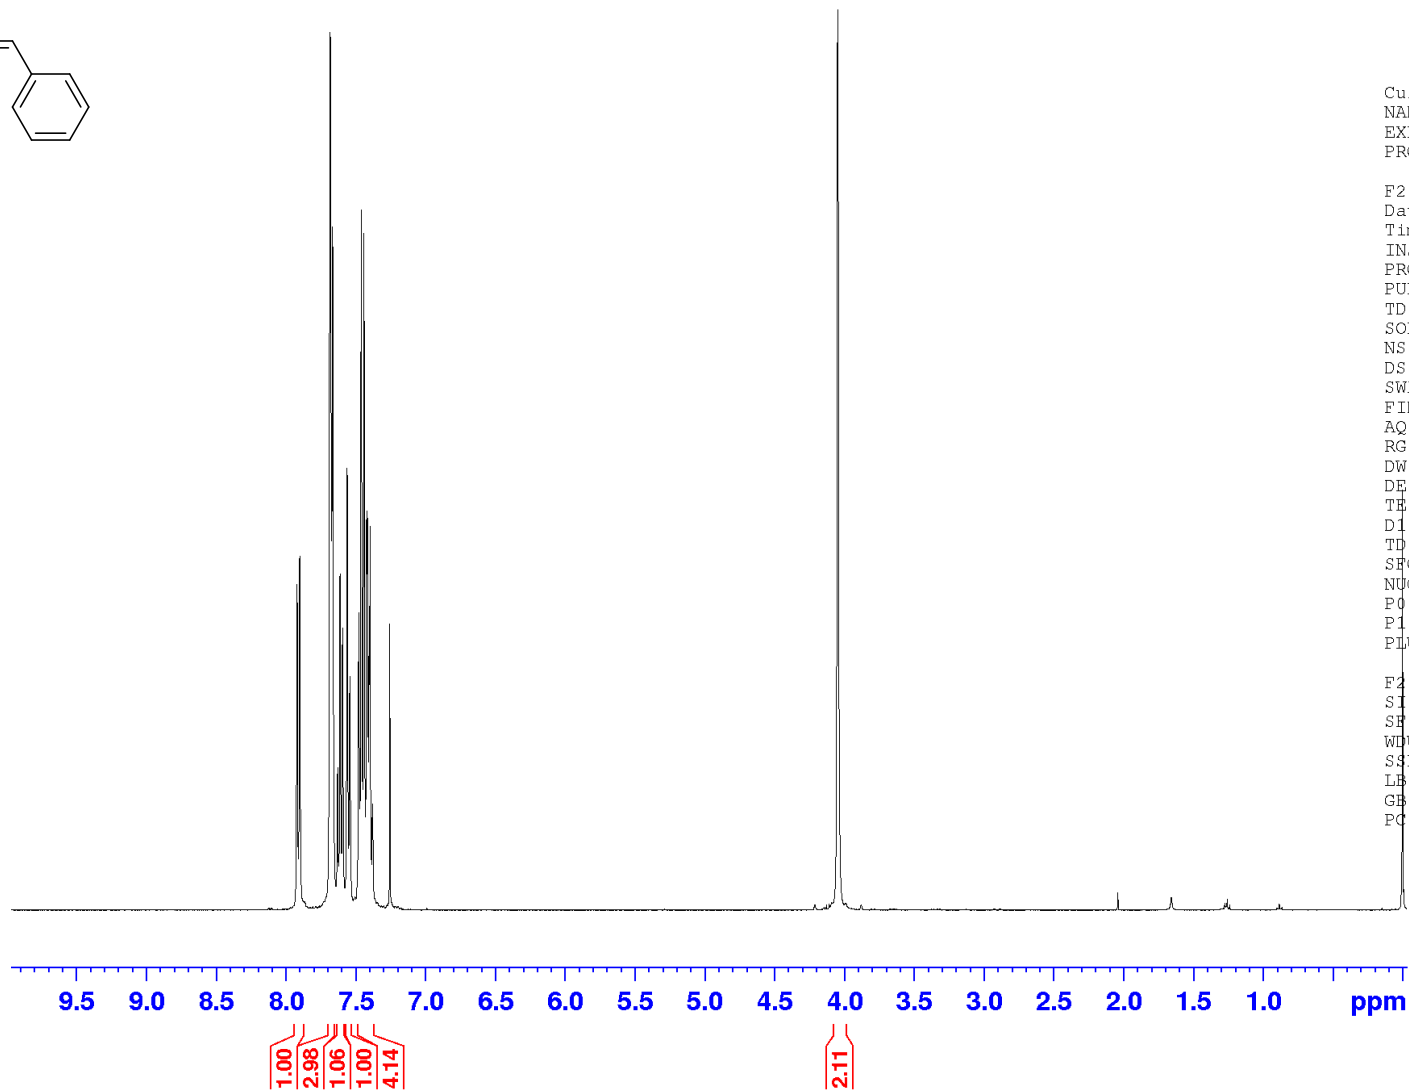

Current Data Parameters  
NAME WR 1.128 Rcd  
EXPNO 10  
PROCNO 1

F2 - Acquisition Parameters  
Date\_ 20210329  
Time 16.40 h  
INSTRUM AVIII\_400  
PROBHD Z108618\_0146 (  
PULPROG zg30  
TD 65536  
SOLVENT CDCl3  
NS 16  
DS 2  
SWH 8223.685 Hz  
FIDRES 0.250967 Hz  
AQ 3.9845889 sec  
RG 144  
DW 60.800 usec  
DE 17.42 usec  
TE 300.0 K  
D1 1.00000000 sec  
TD0 1  
SFO1 400.1124708 MHz  
NUC1 1H  
P0 5.00 usec  
P1 15.00 usec  
PLW1 17.29199982 W

F2 - Processing parameters  
SI 32768  
SF 400.1100114 MHz  
WDW EM  
SFE 0  
LB 0.30 Hz  
GB 0  
PC 1.00

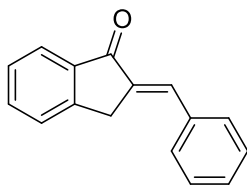

4a

<sup>13</sup>C NMR

101 MHz

CDCl<sub>3</sub>

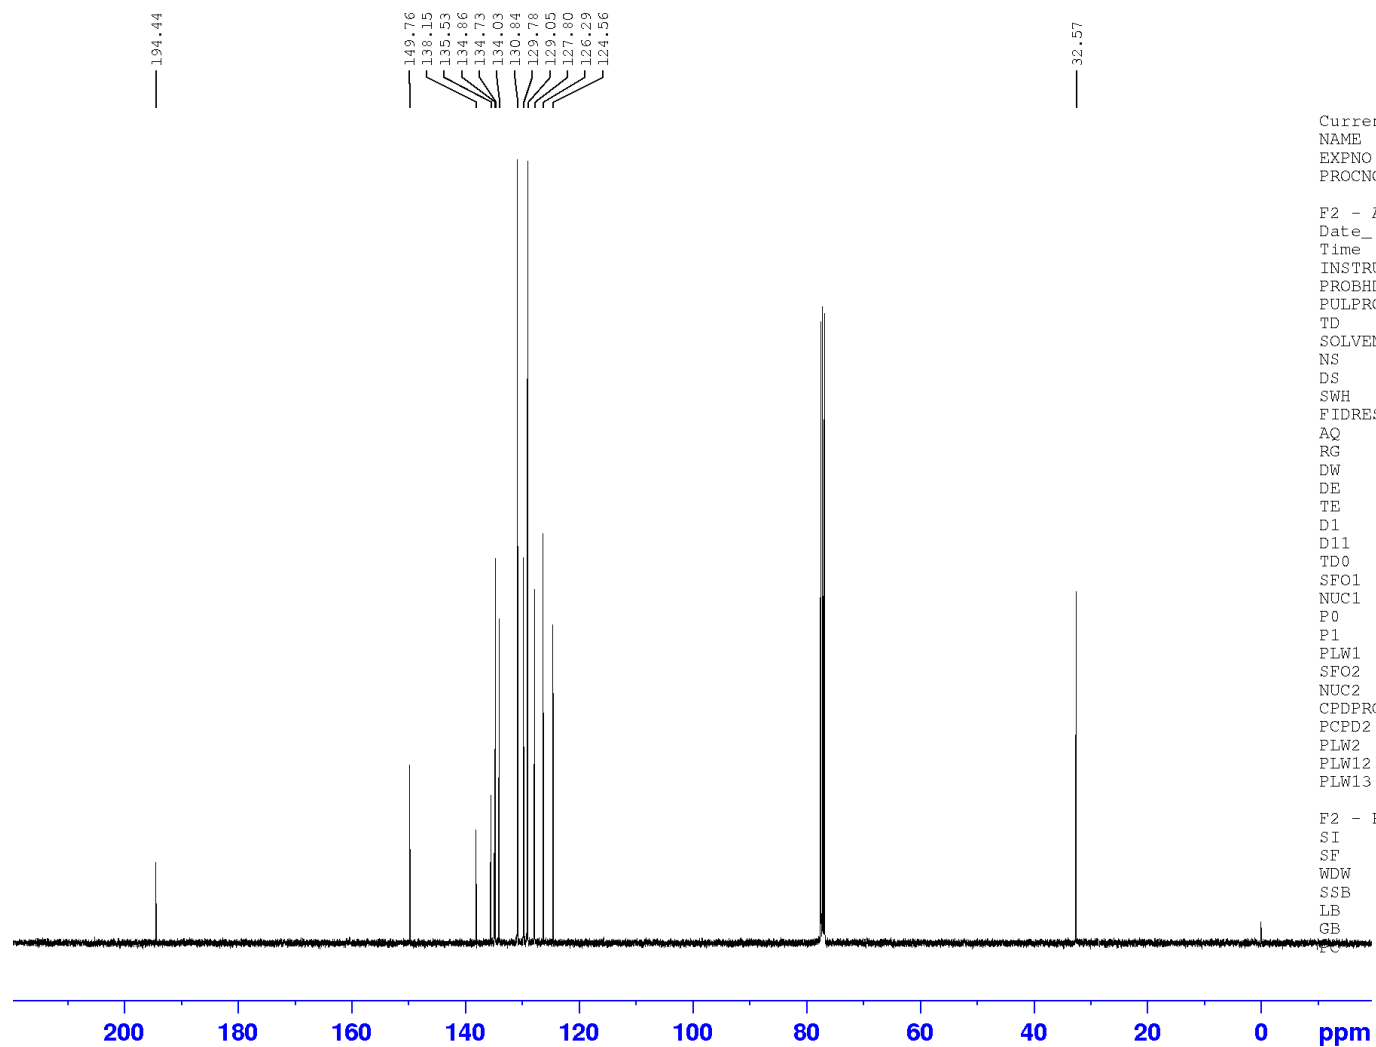

Current Data Parameters  
 NAME WR 1.128 Rcd  
 EXPNO 11  
 PROCNO 1

F2 - Acquisition Parameters  
 Date\_ 20210329  
 Time 17.34 h  
 INSTRUM AVIII\_400  
 PROBHD Z108618\_0146 (  
 PULPROG zgpg30  
 TD 96150  
 SOLVENT CDCl3  
 NS 1024  
 DS 4  
 SWH 24038.461 Hz  
 FIDRES 0.500020 Hz  
 AQ 1.9999200 sec  
 RG 2050  
 DW 20.800 usec  
 DE 6.50 usec  
 TE 300.0 K  
 D1 1.00000000 sec  
 D11 0.03000000 sec  
 TD0 1  
 SFO1 100.6178003 MHz  
 NUC1 13C  
 P0 3.00 usec  
 P1 9.00 usec  
 PLW1 96.68000031 W  
 SFO2 400.1116004 MHz  
 NUC2 1H  
 CPDPRG[2] waltz64  
 PCPD2 90.00 usec  
 PLW2 17.29199982 W  
 PLW12 0.48032999 W  
 PLW13 0.24160001 W

F2 - Processing parameters  
 SI 131072  
 SF 100.6077291 MHz  
 WDW EM  
 SSB 0  
 LB 1.00 Hz  
 GB 0  
 EC 1.40

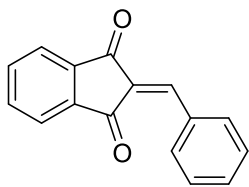

4b

<sup>1</sup>H NMR

400 MHz

CDCl<sub>3</sub>

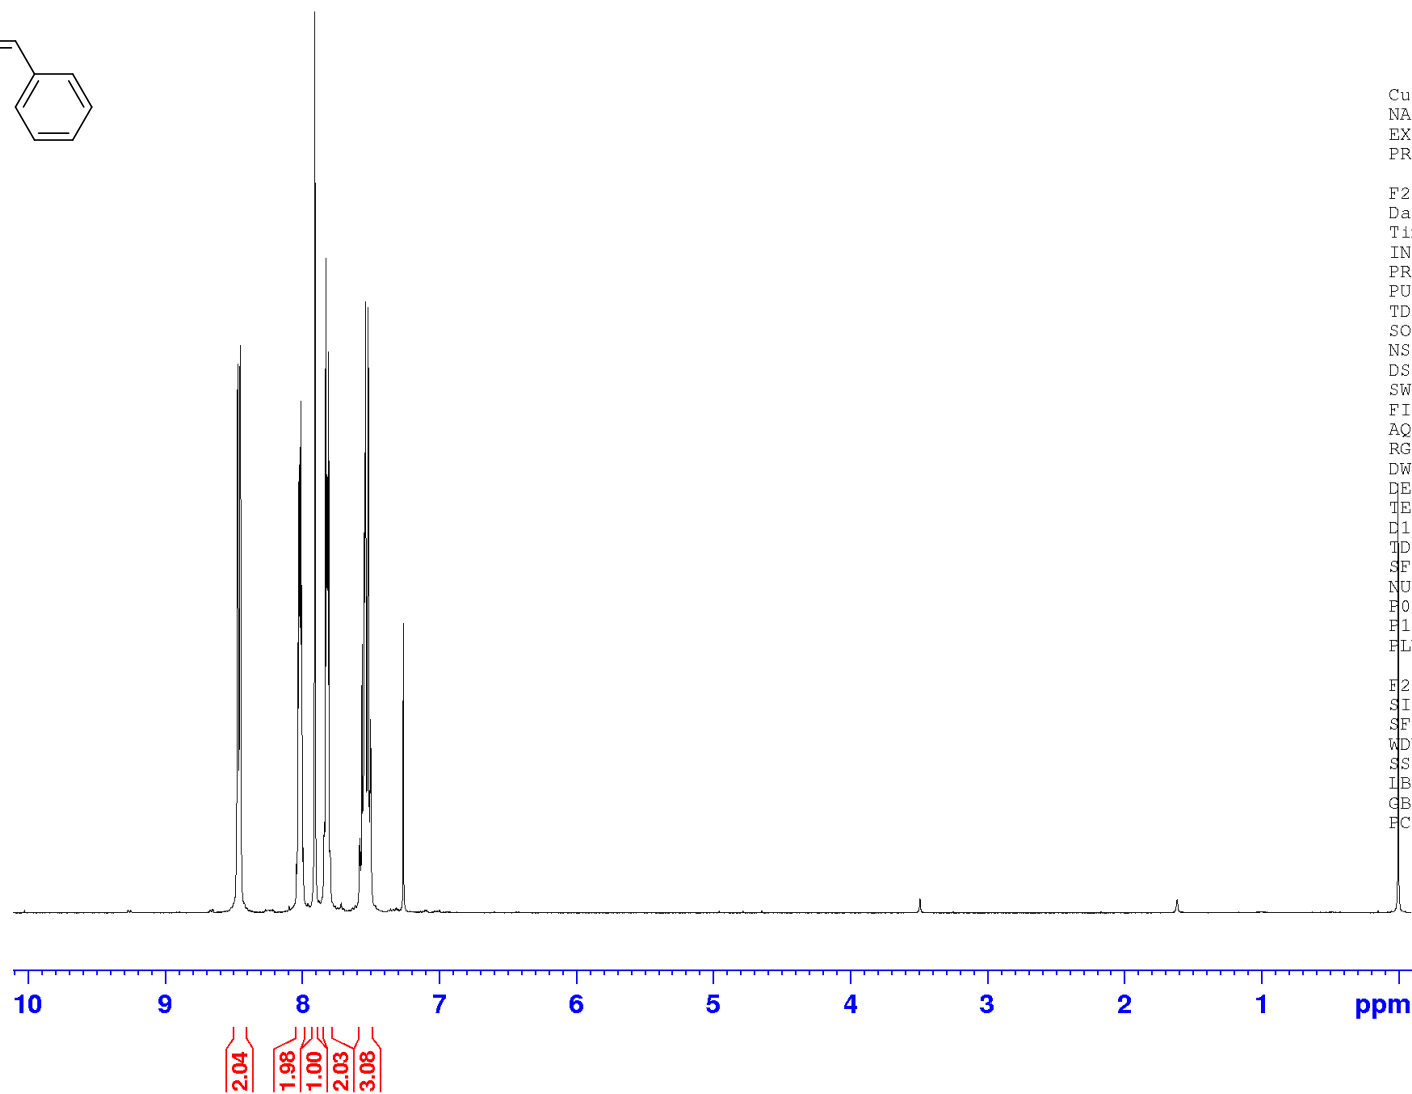

Current Data Parameters  
NAME WR 1.132 Re-run  
EXPNO 10  
PROCNO 1

F2 - Acquisition Parameters  
Date\_ 20210318  
Time 14.27 h  
INSTRUM AVIII\_400  
PROBHD Z108618\_0146 (  
PULPROG zg30  
TD 65536  
SOLVENT CDC13  
NS 16  
DS 2  
SWH 8223.685 Hz  
FIDRES 0.250967 Hz  
AQ 3.9845889 sec  
RG 203  
DW 60.800 usec  
DE 17.42 usec  
TE 300.0 K  
D1 1.00000000 sec  
TD0 1  
SFO1 400.1124708 MHz  
NUC1 1H  
P0 5.00 usec  
F1 15.00 usec  
FLW1 17.29199982 W

F2 - Processing parameters  
SI 32768  
SF 400.1100087 MHz  
WDW EM  
SSB 0  
IB 0.30 Hz  
GB 0  
FC 1.00

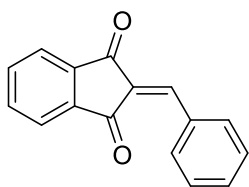

4b

<sup>13</sup>C NMR

101 MHz

CDCl<sub>3</sub>

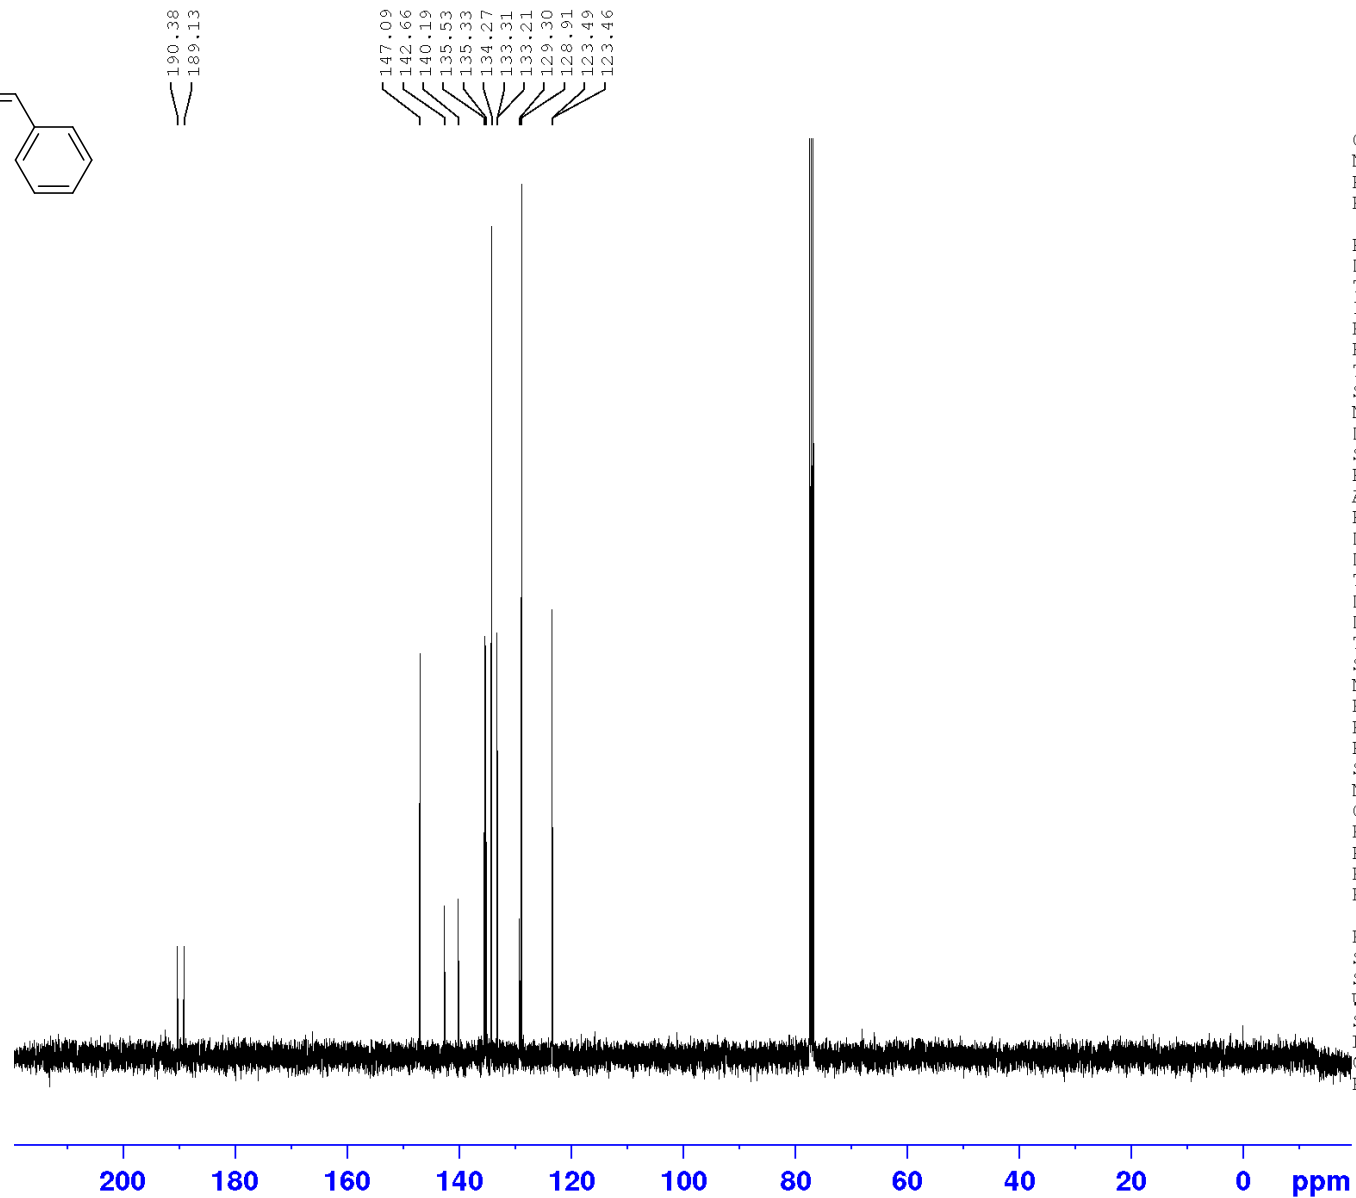

Current Data Parameters  
 NAME WR 1.132 Re-run  
 EXPNO 11  
 PROCNO 1

F2 - Acquisition Parameters  
 Date\_ 20210318  
 Time 18.35 h  
 INSTRUM AVIII\_400  
 PROBHD Z108618\_0146 (  
 PULPROG zgpg30  
 TD 96150  
 SOLVENT CDCl3  
 NS 128  
 DS 4  
 SWH 24038.461 Hz  
 FIDRES 0.500020 Hz  
 AQ 1.9999200 sec  
 RG 2050  
 DW 20.800 usec  
 DE 6.50 usec  
 TE 300.0 K  
 D1 1.00000000 sec  
 D11 0.03000000 sec  
 TD0 1  
 SFO1 100.6178003 MHz  
 NUC1 13C  
 P0 3.00 usec  
 P1 9.00 usec  
 PLW1 96.68000031 W  
 SFO2 400.1116004 MHz  
 NUC2 1H  
 CPDPRG[2] waltz64  
 PCPD2 90.00 usec  
 PLW2 17.29199982 W  
 PLW12 0.48032999 W  
 PLW13 0.24160001 W

F2 - Processing parameters  
 SI 131072  
 SF 100.6077293 MHz  
 WDW EM  
 SSB 0  
 LB 1.00 Hz  
 GB 0  
 PC 1.40

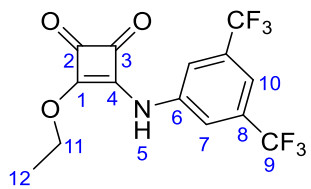

S5

<sup>1</sup>H NMR

400 MHz

DMSO-D6

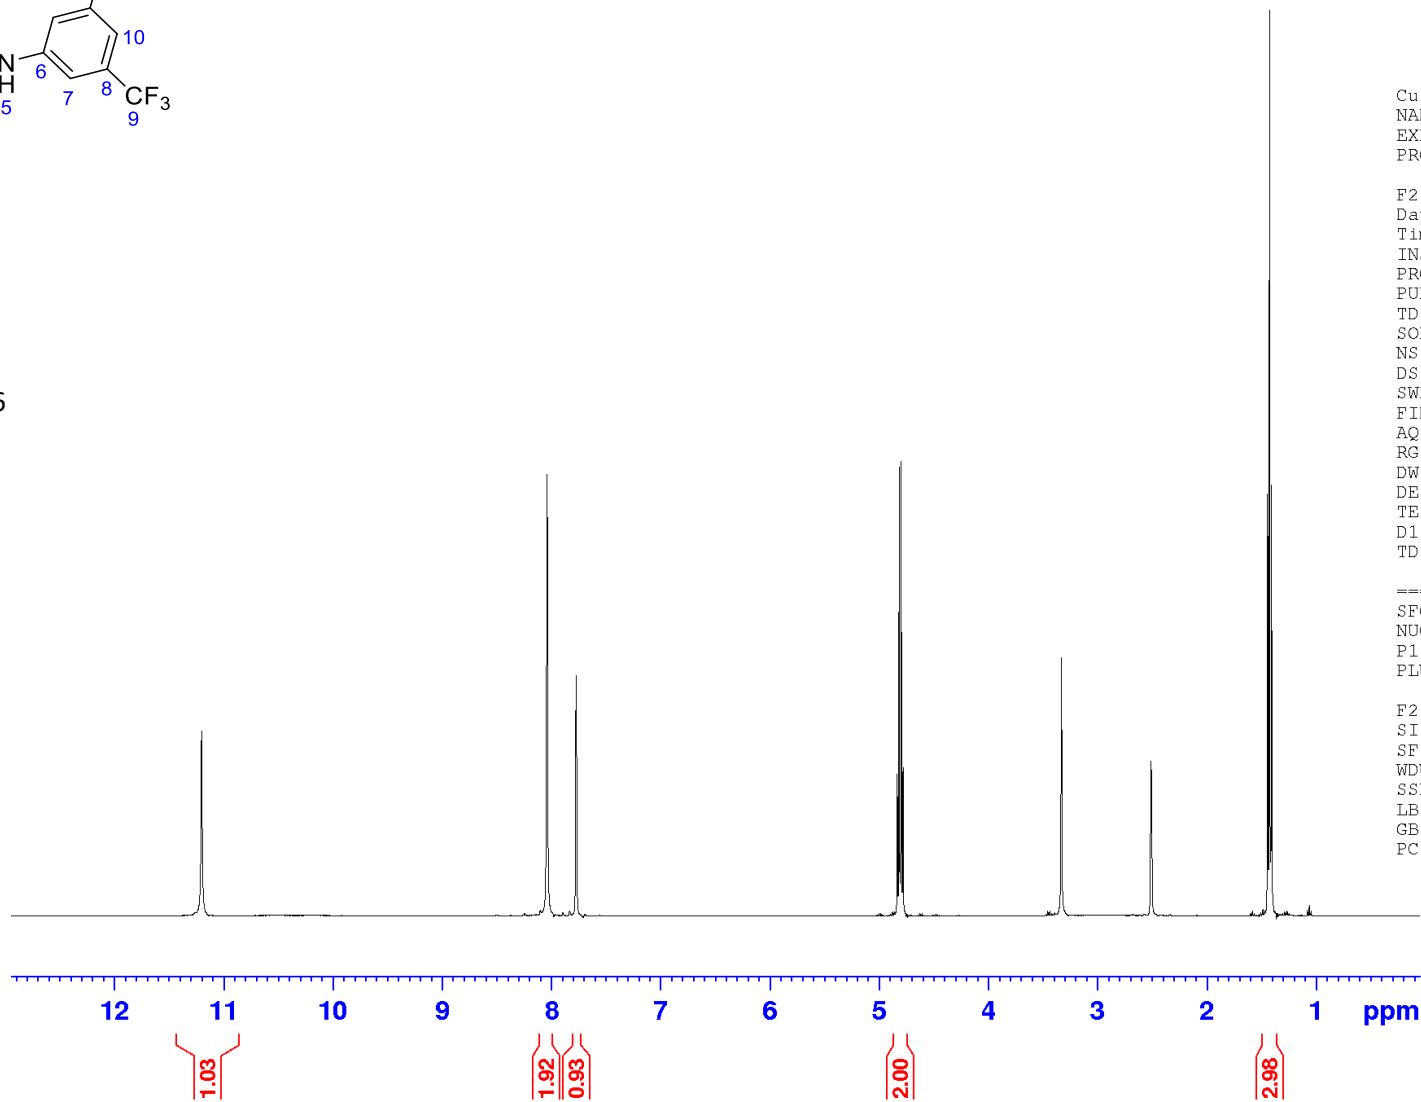

Current Data Parameters  
 NAME CAD-1-07  
 EXPNO 10  
 PROCNO 1

F2 - Acquisition Parameters  
 Date\_ 20191030  
 Time 12.12  
 INSTRUM AVIII\_400  
 PROBHD 5 mm PABEO BB/  
 PULPROG zg30  
 TD 65536  
 SOLVENT DMSO  
 NS 16  
 DS 2  
 SWH 8223.685 Hz  
 FIDRES 0.125483 Hz  
 AQ 3.9845889 sec  
 RG 80.6  
 DW 60.800 usec  
 DE 6.50 usec  
 TE 298.5 K  
 D1 1.00000000 sec  
 TD0 1

==== CHANNEL f1 =====  
 SFO1 399.9124696 MHz  
 NUC1 1H  
 P1 15.00 usec  
 PLW1 17.29199982 W

F2 - Processing parameters  
 SI 32768  
 SF 399.9100000 MHz  
 WDW EM  
 SSB 0  
 LB 0.30 Hz  
 GB 0  
 PC 1.00



S5

<sup>19</sup>F NMR

376 MHz

DMSO-D6

-61.74

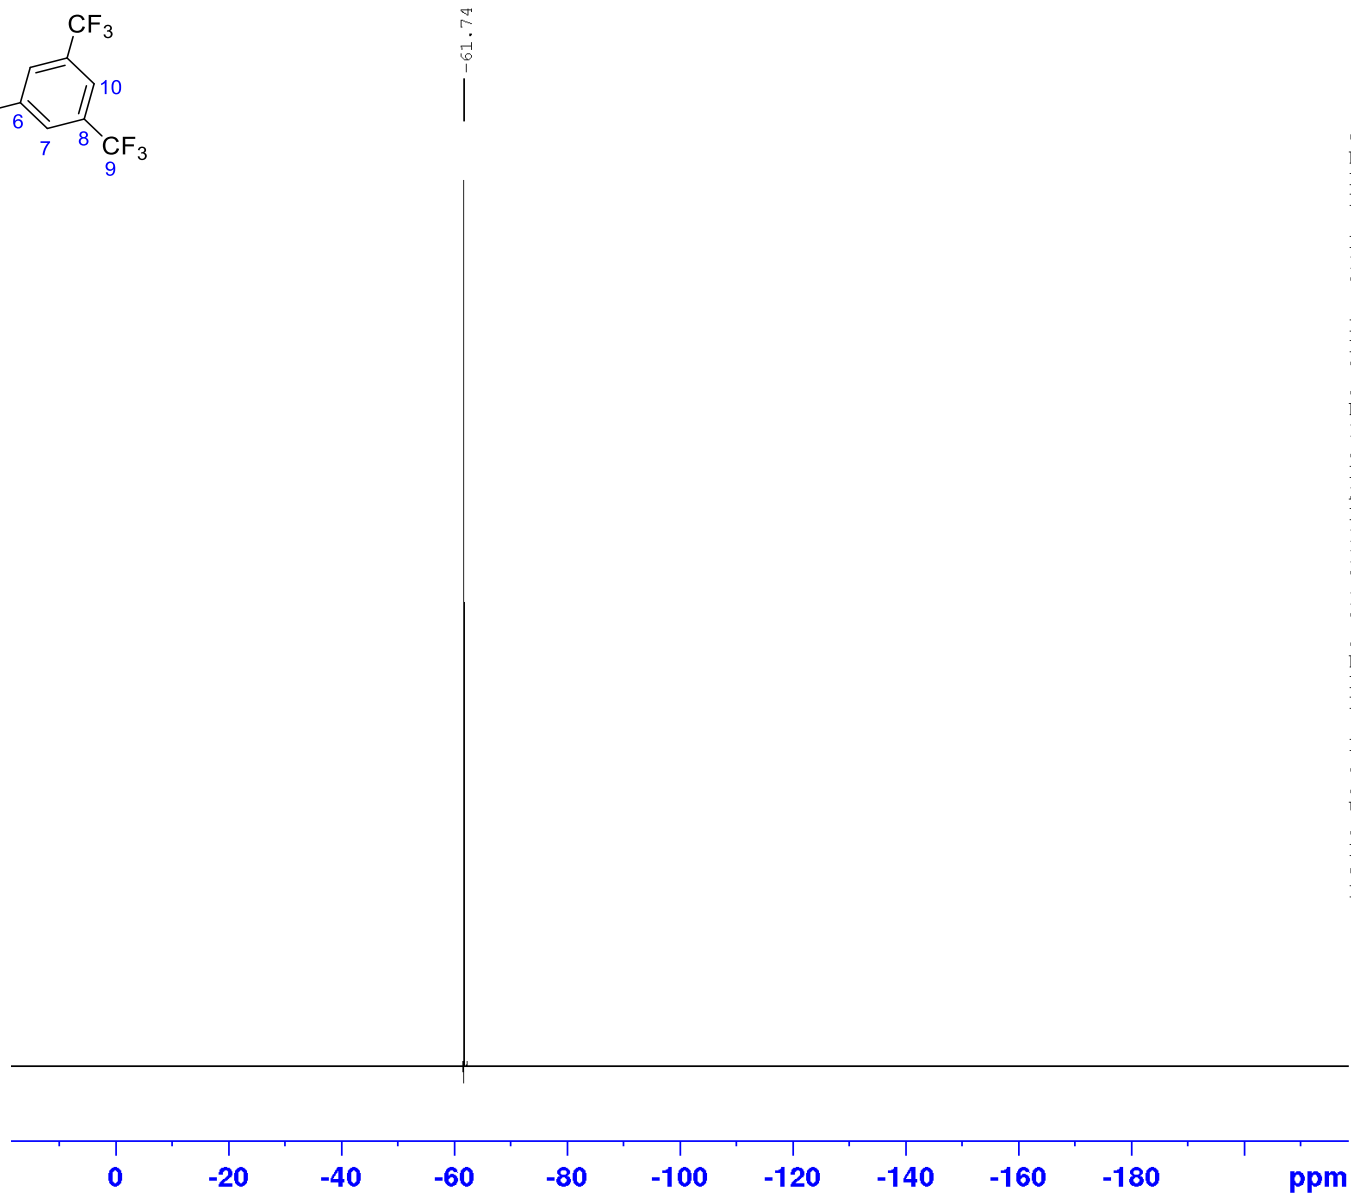

Current Data Parameters  
 NAME CAD-1-07  
 EXPNO 11  
 PROCNO 1

F2 - Acquisition Parameters  
 Date\_ 20191025  
 Time 12.49 h  
 INSTRUM AVIII\_400  
 PROBHD Z108618\_0146 (  
 PULPROG zg  
 TD 261992  
 SOLVENT DMSO  
 NS 16  
 DS 4  
 SWH 89285.711 Hz  
 FIDRES 0.681591 Hz  
 AQ 1.4671552 sec  
 RG 512  
 DW 5.600 usec  
 DE 7.11 usec  
 TE 300.0 K  
 D1 1.00000000 sec  
 TD0 1  
 SFO1 376.4418995 MHz  
 NUC1 19F  
 P1 11.80 usec  
 PLW1 32.96500015 W

F2 - Processing parameters  
 SI 262144  
 SF 376.4795470 MHz  
 WDW EM  
 SSB 0  
 LB 0.30 Hz  
 GB 0  
 PC 1.00





187.38  
184.45  
179.20  
169.11

140.12  
131.10  
123.00  
119.37  
116.19

70.05

15.27

S5

<sup>13</sup>C NMR

101 MHz

DMSO-D6

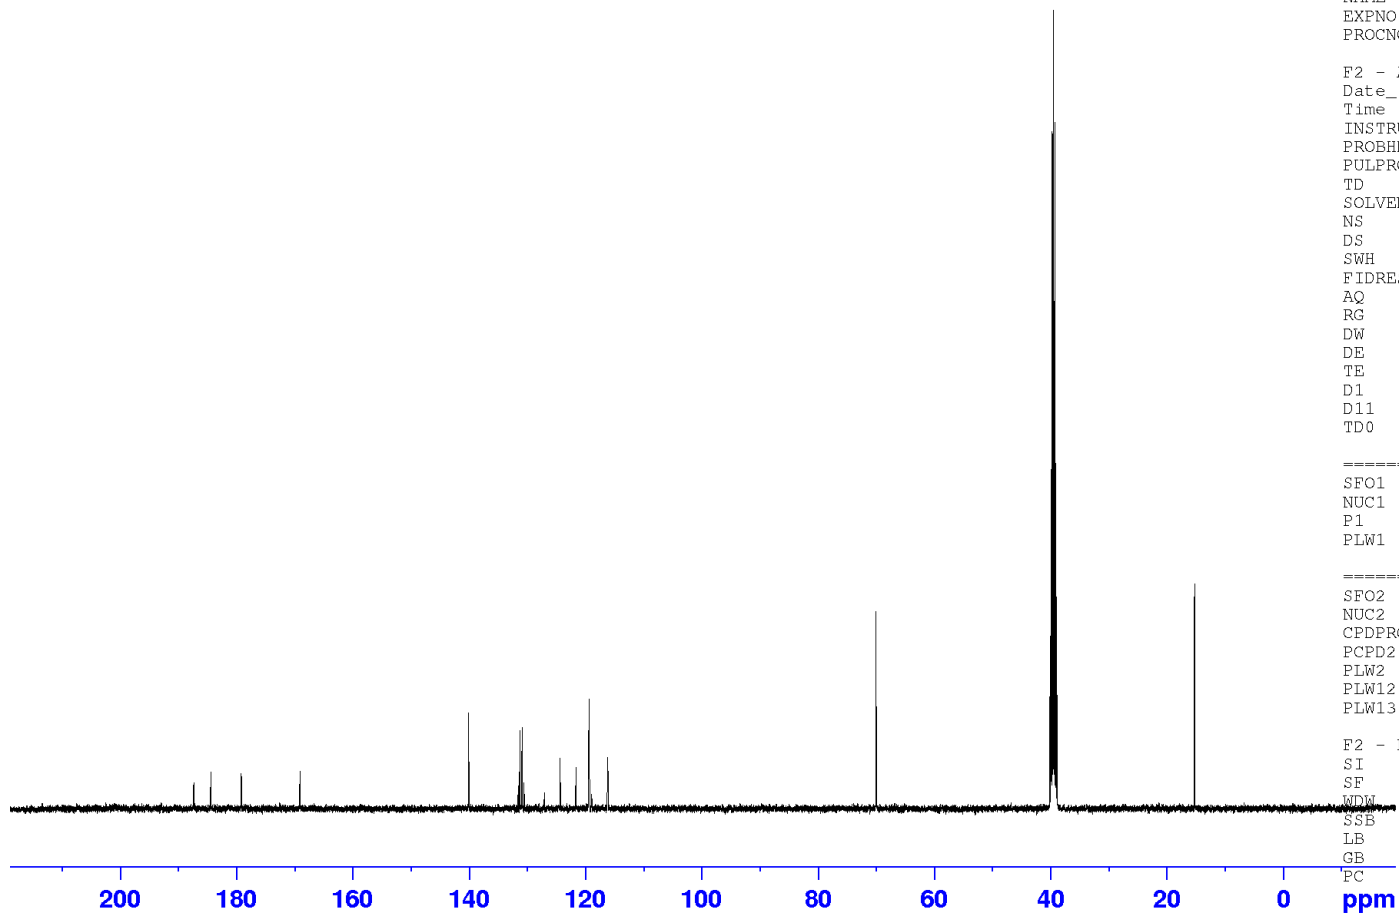

Current Data Parameters  
NAME CAD-1-07  
EXPNO 12  
PROCNO 1

F2 - Acquisition Parameters  
Date\_ 20191030  
Time 21.54  
INSTRUM AVIII\_400  
PROBHD 5 mm PABBO BB/  
PULPROG zgpg30  
TD 96150  
SOLVENT DMSO  
NS 1024  
DS 4  
SWH 24038.461 Hz  
FIDRES 0.250010 Hz  
AQ 1.9999200 sec  
RG 181  
DW 20.800 usec  
DE 6.50 usec  
TE 304.9 K  
D1 1.00000000 sec  
D11 0.03000000 sec  
TD0 1

===== CHANNEL f1 =====  
SFO1 100.5675047 MHz  
NUC1 13C  
P1 9.00 usec  
PLW1 96.68000031 W

===== CHANNEL f2 =====  
SFO2 399.9115996 MHz  
NUC2 1H  
CPDPRG[2] waltz64  
PCPD2 90.00 usec  
PLW2 17.29199982 W  
PLW12 0.48032999 W  
PLW13 0.38907000 W

F2 - Processing parameters  
SI 131072  
SF 100.5575039 MHz  
WDW EM  
SSB 0  
LB 1.00 Hz  
GB 0  
PC 1.40

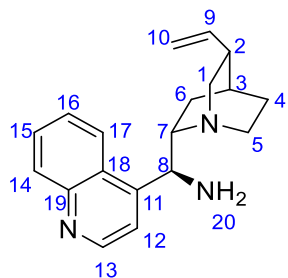

S6

<sup>1</sup>H NMR

600 MHz

CDCl<sub>3</sub>

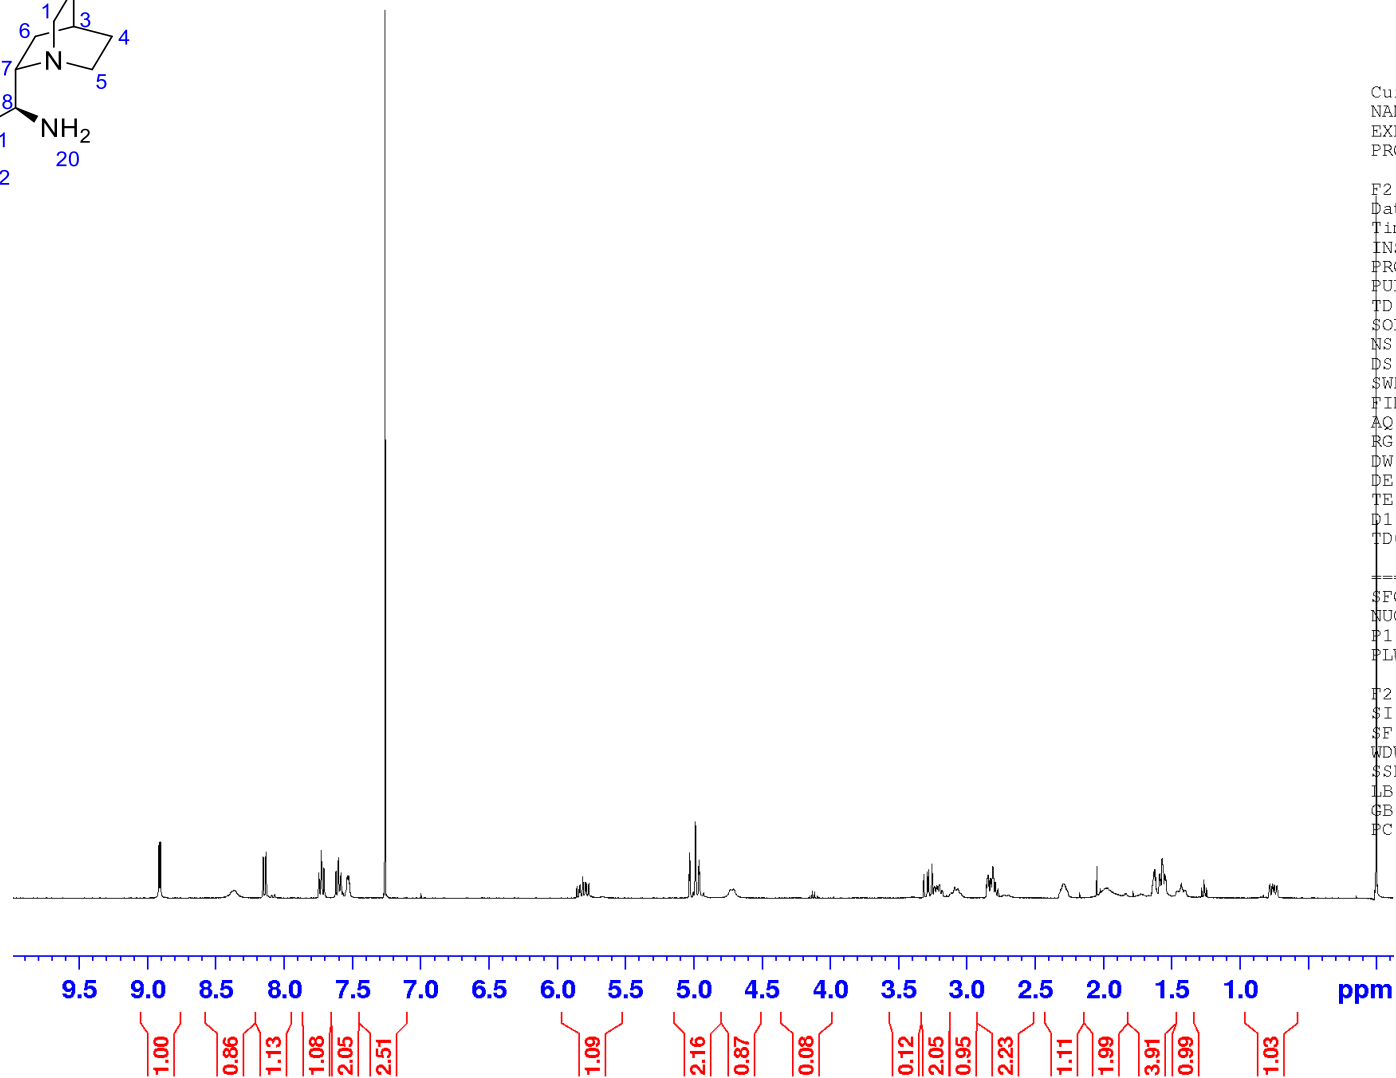

Current Data Parameters  
 NAME REM1-26-4  
 EXPNO 10  
 PROCNO 1

F2 - Acquisition Parameters  
 Date\_ 20180213  
 Time 15.19  
 INSTRUM AVIII\_400  
 PROBHD 5 mm PABBO BB-  
 PULPROG zg30  
 TD 65536  
 \$SOLVENT CDCl3  
 NS 16  
 DS 2  
 \$WH 8223.685 Hz  
 FIDRES 0.125483 Hz  
 AQ 3.9845889 sec  
 RG 287  
 DW 60.800 usec  
 DE 16.82 usec  
 TE 300.0 K  
 D1 1.00000000 sec  
 TD0 1

==== CHANNEL f1 =====  
 \$FO1 400.1124708 MHz  
 NUC1 1H  
 P1 15.00 usec  
 PLW1 17.29199982 W

F2 - Processing parameters  
 \$I 32768  
 \$F 400.1100095 MHz  
 WDW EM  
 \$SB 0  
 LB 0.30 Hz  
 GB 0  
 PC 1.00

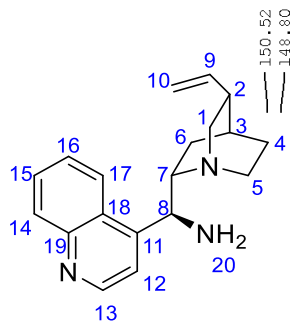

S6

<sup>13</sup>C NMR

151 MHz

CDCl<sub>3</sub>

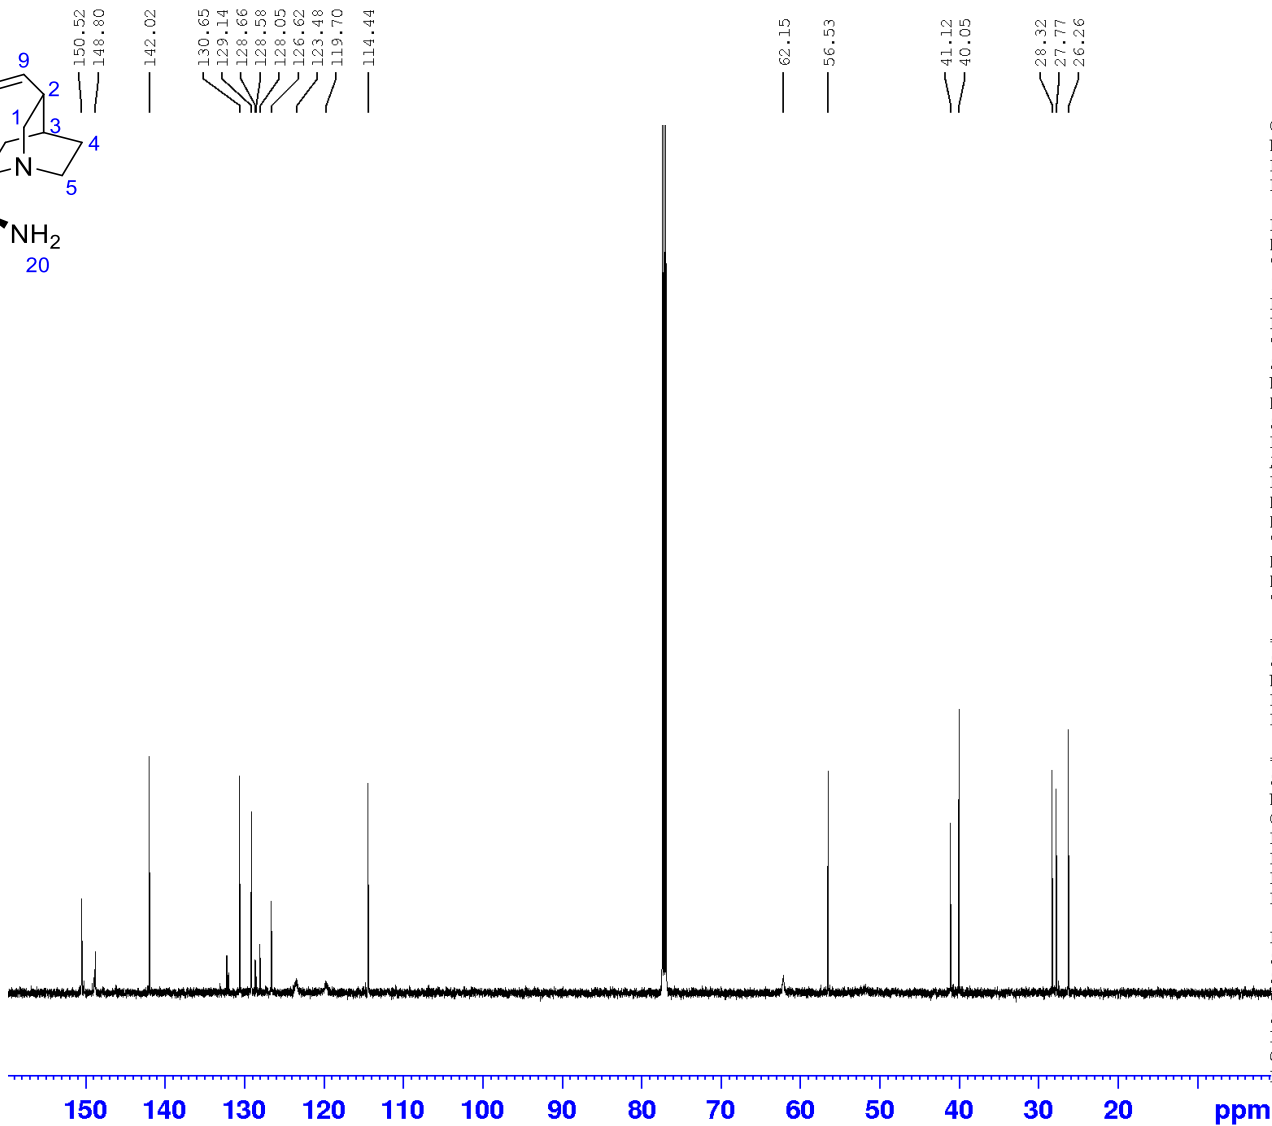

Current Data Parameters  
 NAME CAD-1-08 600  
 EXPNO 11  
 PROCNO 1

F2 - Acquisition Parameters  
 Date\_ 20191029  
 Time 17.53  
 INSTRUM spect  
 PROBHD 5 mm PABBO BB/  
 PULPROG zgpg30  
 TD 65536  
 SOLVENT CDCl3  
 NS 1024  
 DS 4  
 SWH 36057.691 Hz  
 FIDRES 0.550197 Hz  
 AQ 0.9087659 sec  
 RG 186.92  
 DW 13.867 usec  
 DE 6.50 usec  
 TE 298.4 K  
 D1 2.00000000 sec  
 D11 0.03000000 sec  
 TD0 1

===== CHANNEL f1 =====  
 SFO1 150.9178981 MHz  
 NUC1 13C  
 P1 11.80 usec  
 PLW1 85.00000000 W

===== CHANNEL f2 =====  
 SFO2 600.1324005 MHz  
 NUC2 1H  
 CPDPRG[2] waltz16  
 PCPD2 80.00 usec  
 PLW2 27.00000000 W  
 PLW12 0.43891999 W  
 PLW13 0.28090999 W

F2 - Processing parameters  
 SI 32768  
 SF 150.9027876 MHz  
 WDW EM  
 SSB 0  
 LB 1.00 Hz  
 GB 0  
 PC 1.40

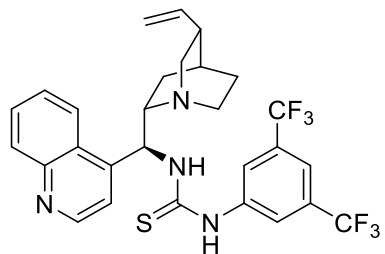

C1

<sup>1</sup>H NMR

400 MHz

CDCl<sub>3</sub>

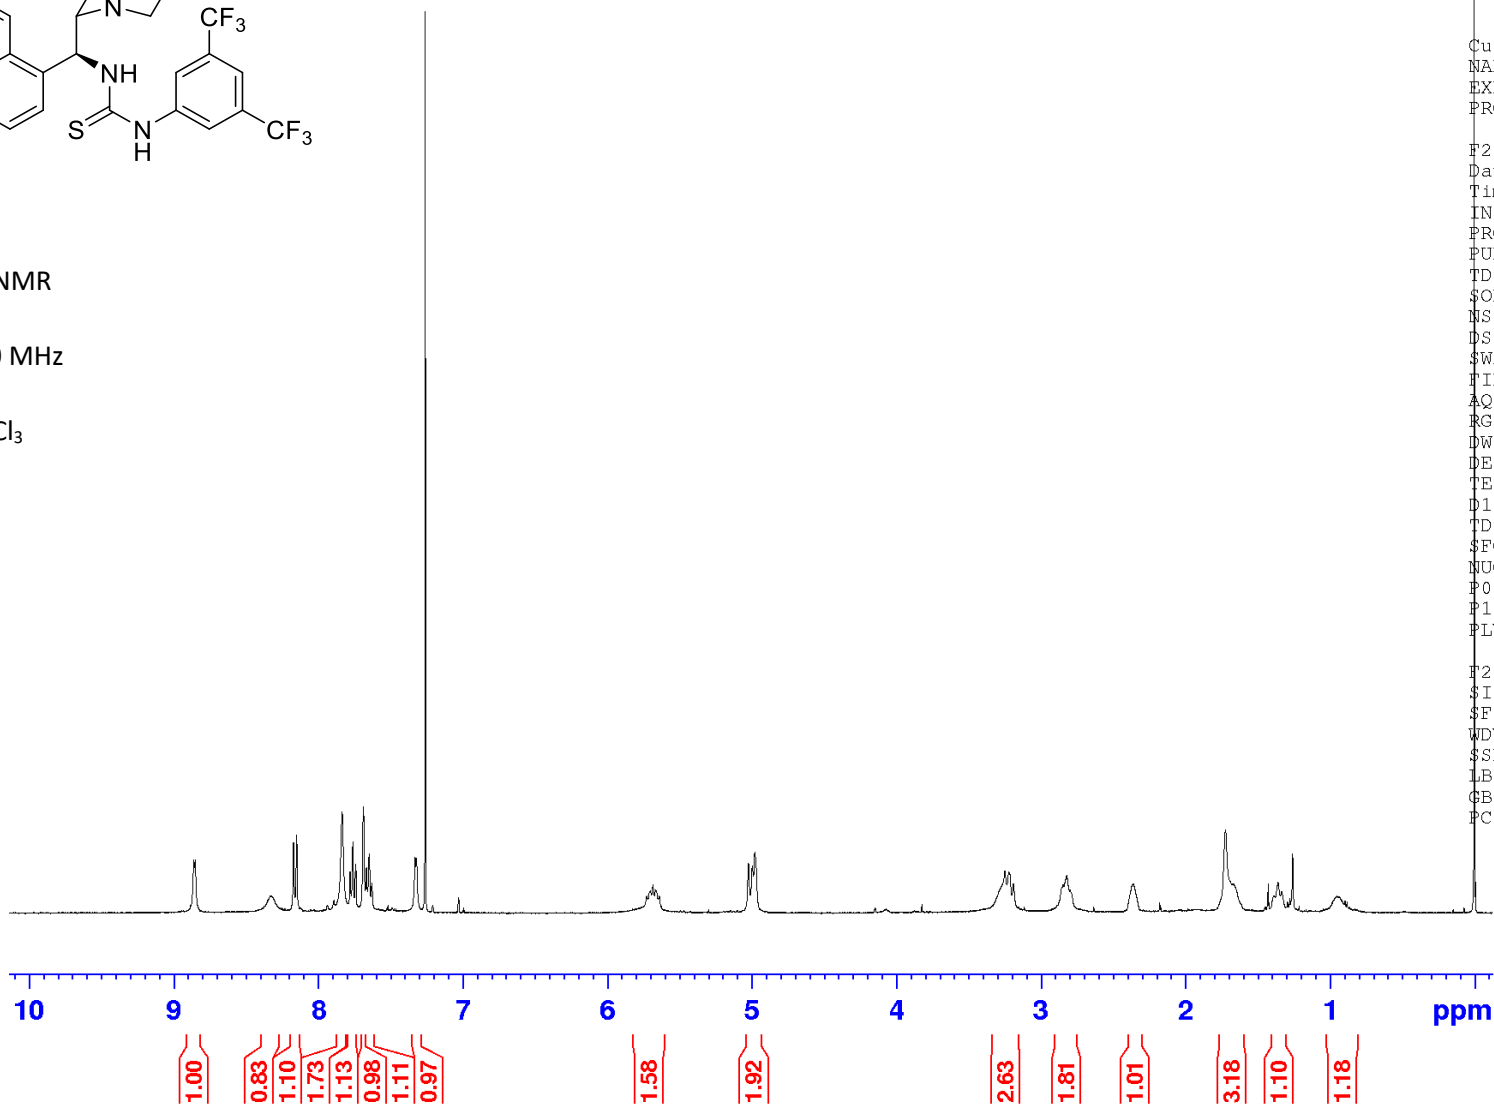

Current Data Parameters  
 NAME REM2-8-3  
 EXPNO 40  
 PROCNO 1

F2 - Acquisition Parameters  
 Date\_ 20210804  
 Time 17.18 h  
 INSTRUM AVIII\_400  
 PROBHD Z108618\_0146 (  
 PULPROG zg30  
 TD 65536  
 SOLVENT CDC13  
 NS 16  
 DS 2  
 SWH 8223.685 Hz  
 FIDRES 0.250967 Hz  
 AQ 3.9845889 sec  
 RG 256  
 DW 60.800 usec  
 DE 17.42 usec  
 TE 300.0 K  
 D1 1.00000000 sec  
 TD0 1  
 SFO1 400.1124708 MHz  
 NUC1 1H  
 P0 5.00 usec  
 P1 15.00 usec  
 PLW1 17.29199982 W

F2 - Processing parameters  
 SI 32768  
 SF 400.1100091 MHz  
 WDW EM  
 SSB 0  
 LB 0.30 Hz  
 GB 0  
 PC 1.00

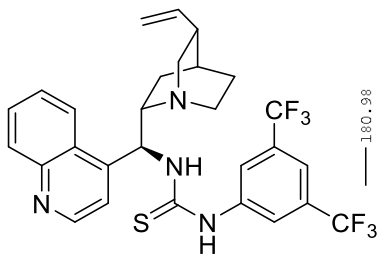

C1

<sup>13</sup>C NMR

101 MHz

CDCl<sub>3</sub>

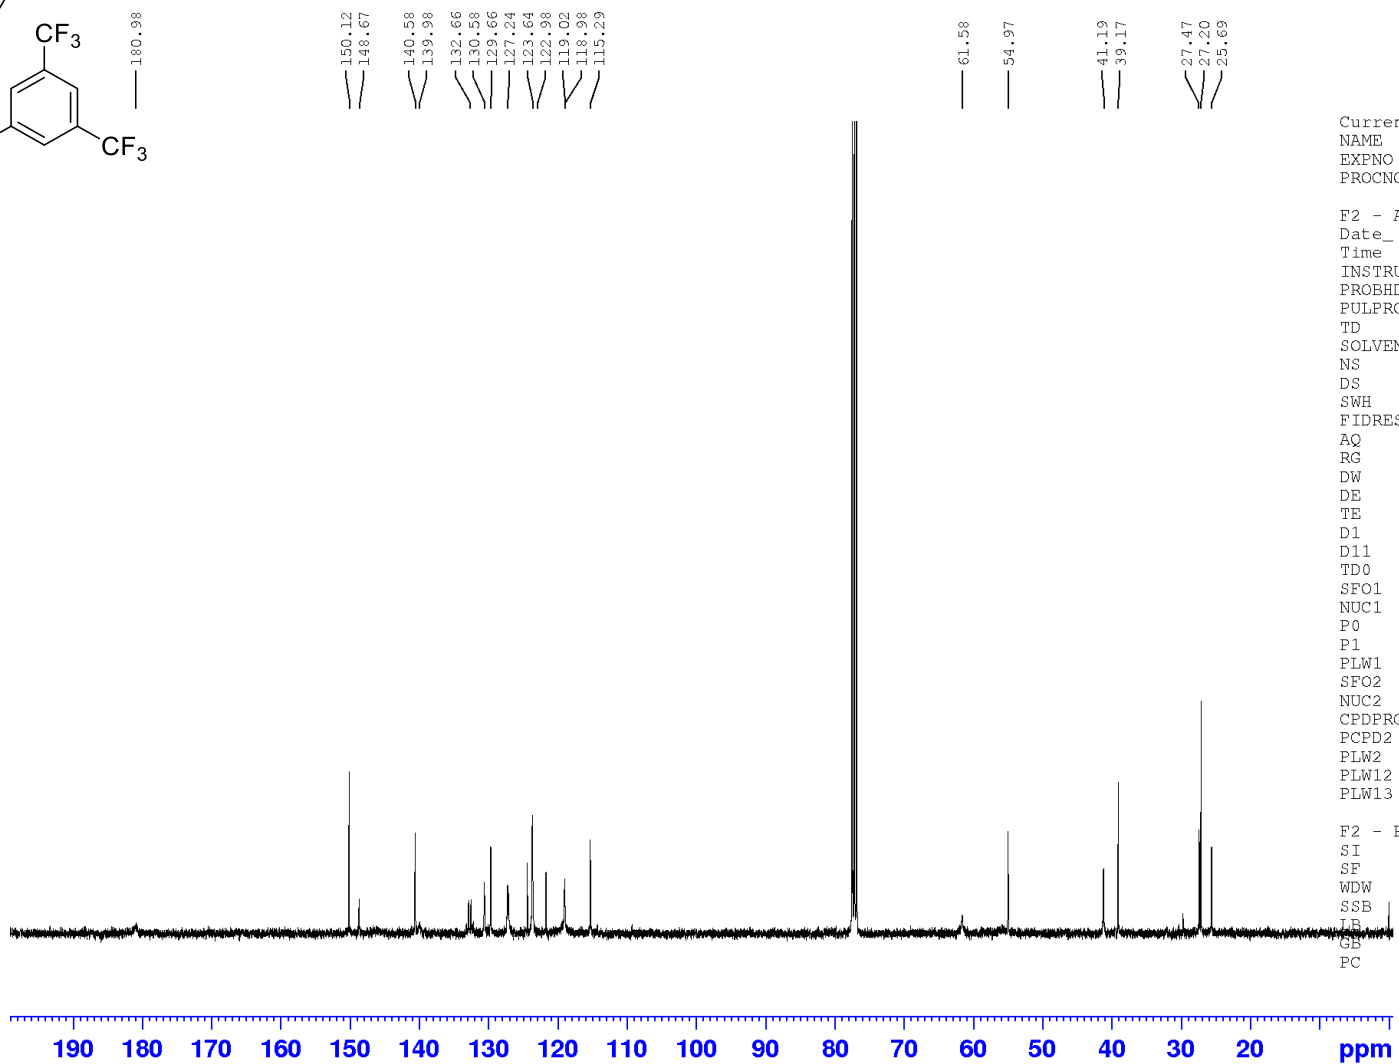

```

Current Data Parameters
NAME      REM2-8-3
EXPNO     20
PROCNO    1

F2 - Acquisition Parameters
Date_     20210805
Time      20.50 h
INSTRUM   AVIII_400
PROBHD    Z108618_0146 (
PULPROG   zgpg30
TD         96150
SOLVENT   CDCl3
NS         2048
DS         4
SWH        24038.461 Hz
FIDRES     0.500020 Hz
AQ         1.9999200 sec
RG         2050
DW         20.800 usec
DE         6.50 usec
TE         300.0 K
D1         1.00000000 sec
D11        0.03000000 sec
TD0        1
SFO1       100.6178003 MHz
NUC1        13C
P0          3.00 usec
P1          9.00 usec
PLW1        96.68000031 W
SFO2        400.1116004 MHz
NUC2         1H
PCPDPRG[2] waltz64
PCPD2       90.00 usec
PLW2        17.29199982 W
PLW12       0.48032999 W
PLW13       0.24160001 W

F2 - Processing parameters
SI          131072
SF          100.6077282 MHz
WDW         EM
SSB         0
LB          1.00 Hz
GB          0
PC          1.40
  
```



C1

<sup>19</sup>F NMR

376 MHz

CDCl<sub>3</sub>

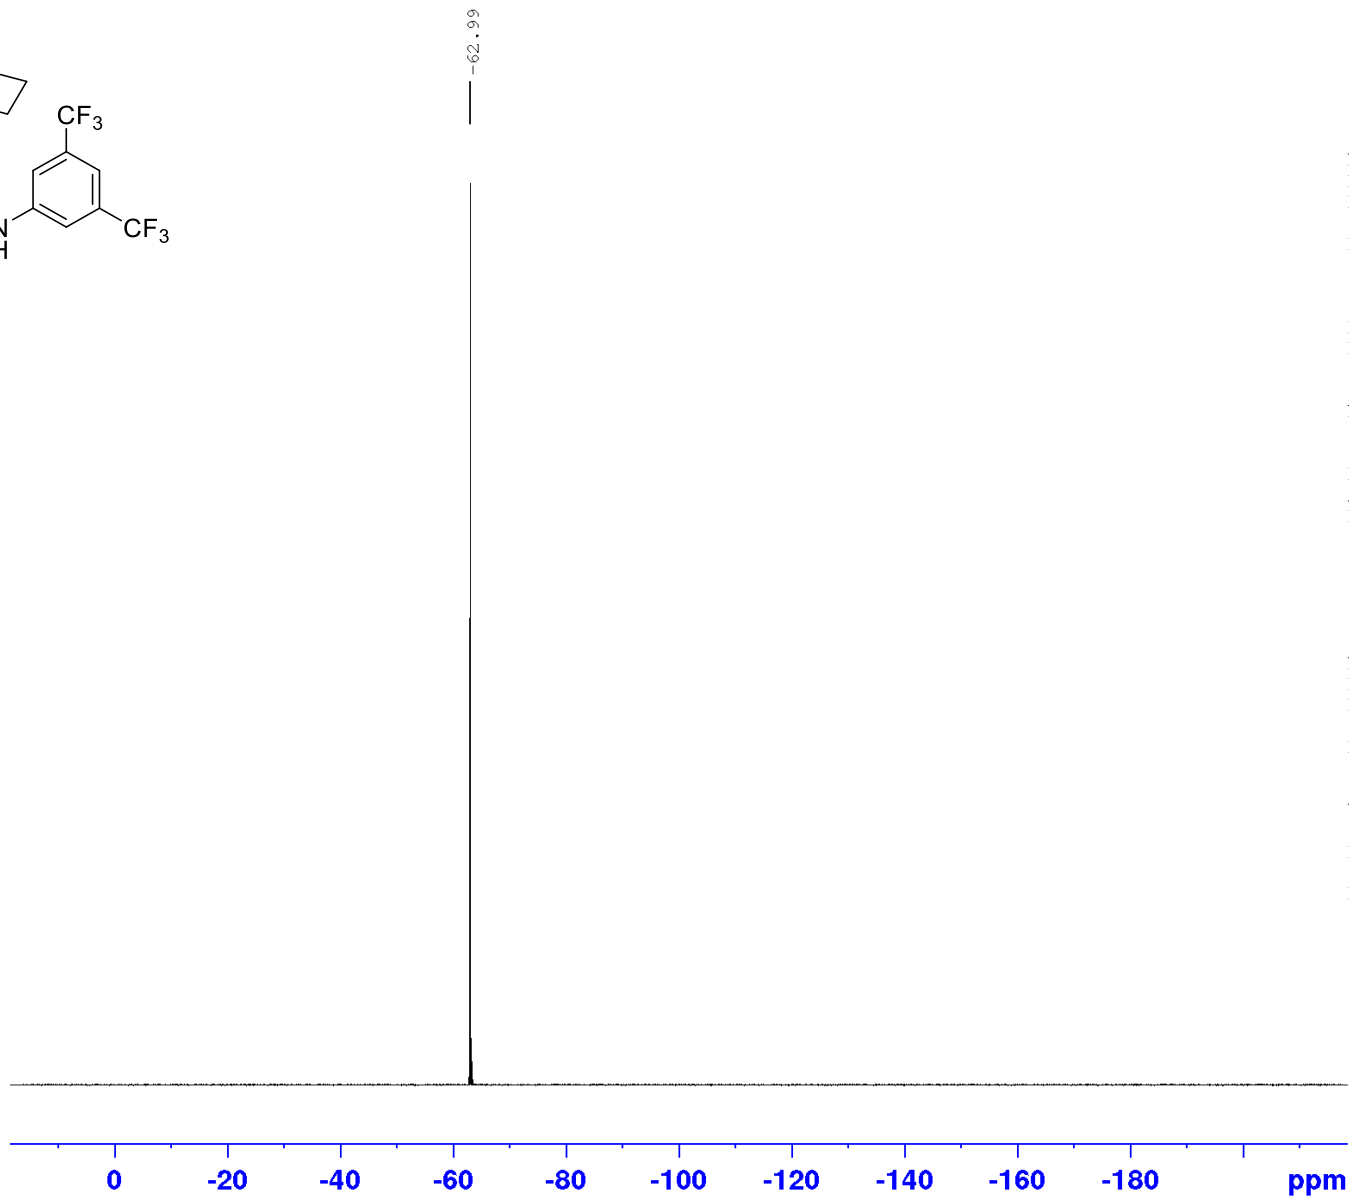

Current Data Parameters  
 NAME REM2-8-3  
 EXPNO 11  
 PROCNO 1

F2 - Acquisition Parameters  
 Date\_ 20210804  
 Time 17.13 h  
 INSTRUM AVIII\_400  
 PROBHD Z108618\_0146 (  
 PULPROG zg  
 TD 261992  
 SOLVENT CDCl3  
 NS 16  
 DS 4  
 SWH 89285.711 Hz  
 FIDRES 0.681591 Hz  
 AQ 1.4671552 sec  
 RG 575  
 DW 5.600 usec  
 DE 7.11 usec  
 TE 300.0 K  
 D1 1.00000000 sec  
 TD0 1  
 SFO1 376.4418995 MHz  
 NUC1 19F  
 P1 11.80 usec  
 PLW1 32.96500015 W

F2 - Processing parameters  
 SI 262144  
 SF 376.4795470 MHz  
 WDW EM  
 SSB 0  
 LB 0.30 Hz  
 GB 0  
 PC 1.00

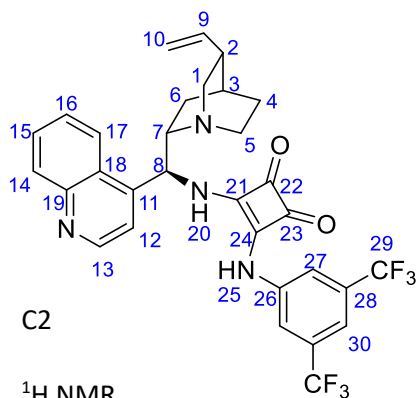

C2

<sup>1</sup>H NMR

600 MHz

DMSO-d<sub>6</sub>

Current Data Parameters  
 NAME CAD-1-09B  
 EXPNO 10  
 PROCNO 1

F2 - Acquisition Parameters  
 Date\_ 20191106  
 Time 21.18  
 INSTRUM spect  
 PROBHD 5 mm PABBO BB/  
 PULPROG zg30  
 TD 65536  
 SOLVENT DMSO  
 NS 16  
 DS 2  
 SWH 12019.230 F  
 FIDRES 0.183399 F  
 AQ 2.7262976 s  
 RG 97.5  
 DW 41.600 μs  
 DE 6.50 μs  
 TE 300.0 K  
 D1 1.00000000 s  
 TD0 1

===== CHANNEL f1 =====  
 SFO1 600.1337060 M  
 NUC1 1H  
 P1 10.00 μs  
 PLW1 26.60000038 W

F2 - Processing parameters  
 SI 65536  
 SF 600.1300000 M  
 WDW EM  
 SSB 0  
 LB 0.30 F  
 GB 0  
 PC 1.00

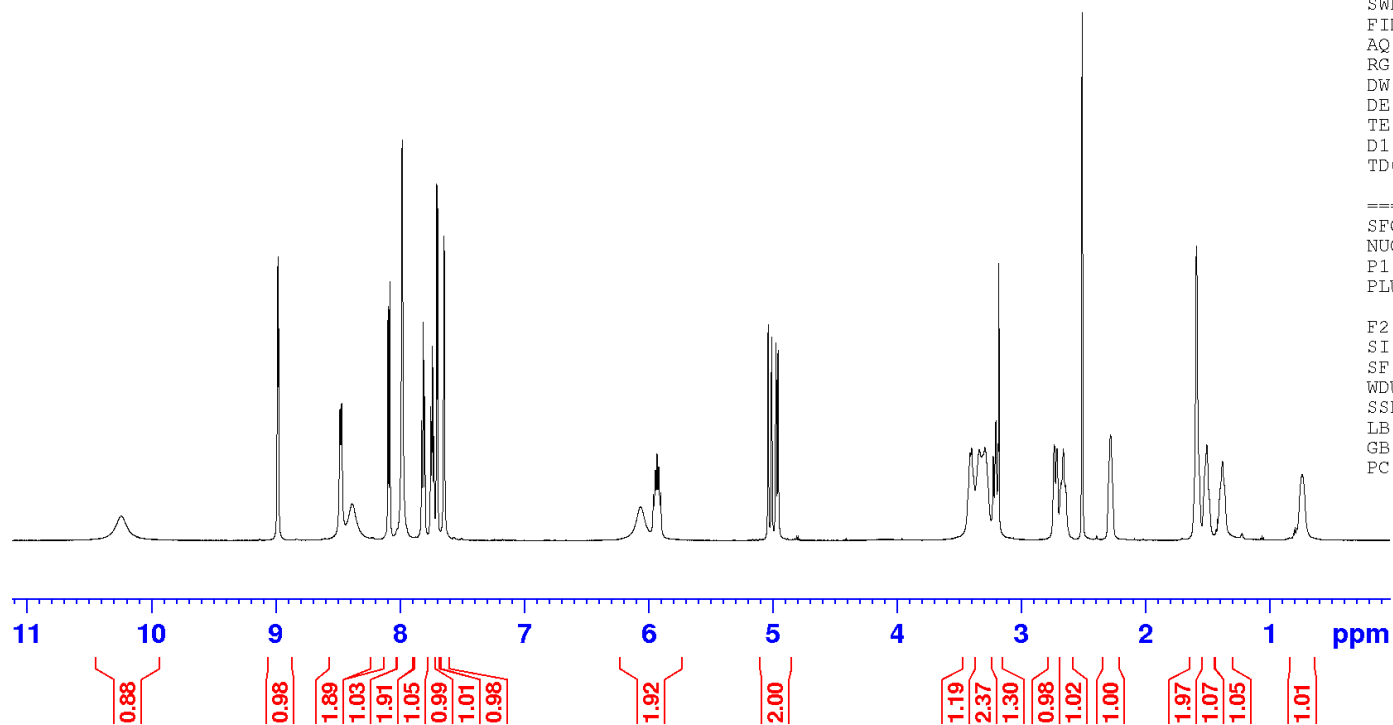

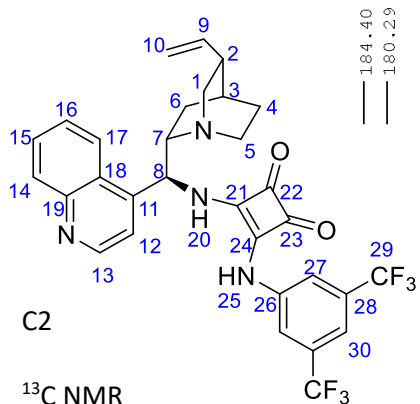

C2

<sup>13</sup>C NMR

151 MHz

DMSO-d<sub>6</sub>

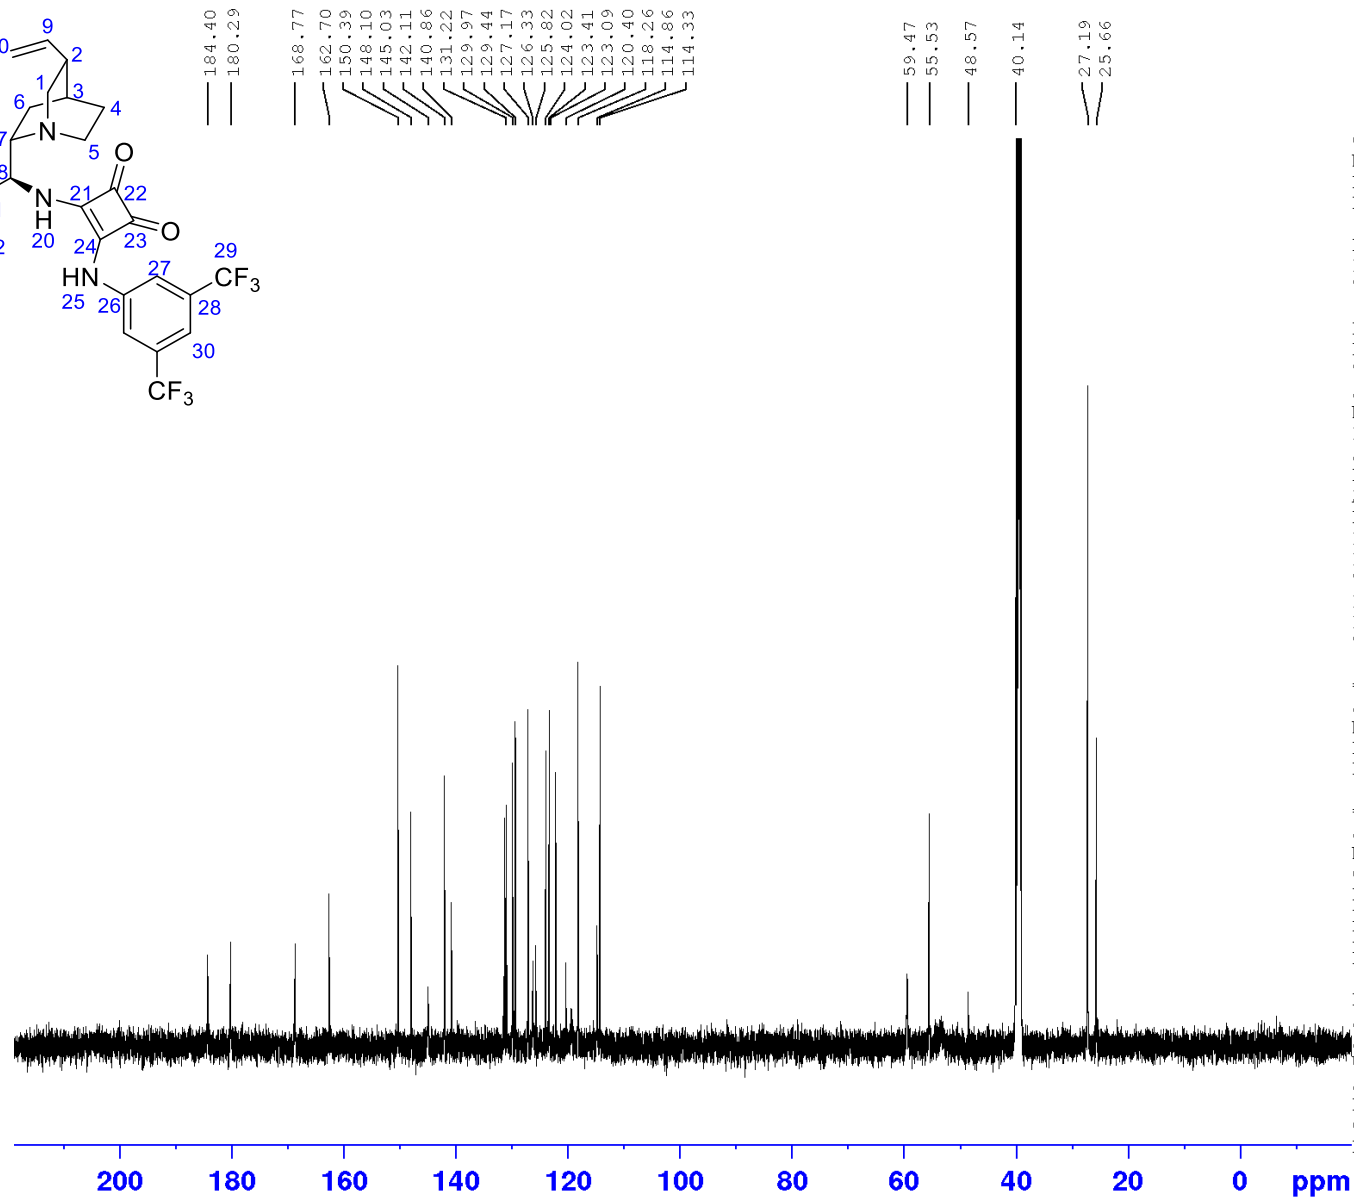

Current Data Parameters  
 NAME CAD-1-09B  
 EXPNO 11  
 PROCNO 1

F2 - Acquisition Parameters  
 Date\_ 20191106  
 Time 23.01  
 INSTRUM spect  
 PROBHD 5 mm PABBO BB/  
 PULPROG zgpg30  
 TD 65536  
 SOLVENT DMSO  
 NS 2048  
 DS 4  
 SWH 36057.691 Hz  
 FIDRES 0.550197 Hz  
 AQ 0.9087659 sec  
 RG 186.92  
 DW 13.867 usec  
 DE 6.50 usec  
 TE 300.0 K  
 D1 2.00000000 sec  
 D11 0.03000000 sec  
 TD0 1

==== CHANNEL f1 =====  
 SFO1 150.9178981 MHz  
 NUC1 13C  
 P1 11.80 usec  
 PLW1 85.00000000 W  
 ===== CHANNEL f2 =====  
 SFO2 600.1324005 MHz  
 NUC2 1H  
 CPDPRG[2] waltz16  
 PCPD2 80.00 usec  
 PLW2 27.00000000 W  
 PLW12 0.43891999 W  
 PLW13 0.28090999 W

F2 - Processing parameters  
 SI 32768  
 SF 150.9028821 MHz  
 WDW EM  
 SSB 0  
 LB 1.00 Hz  
 GB 0  
 PC 1.40



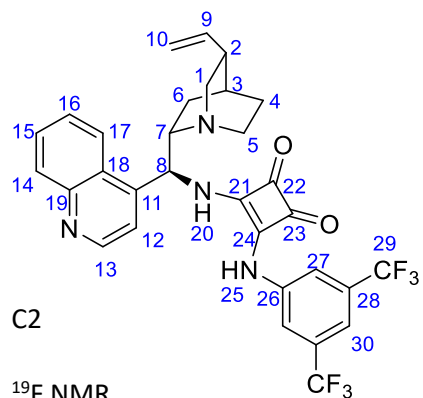

C2

<sup>19</sup>F NMR

376 MHz

DMSO-d6

-61.75

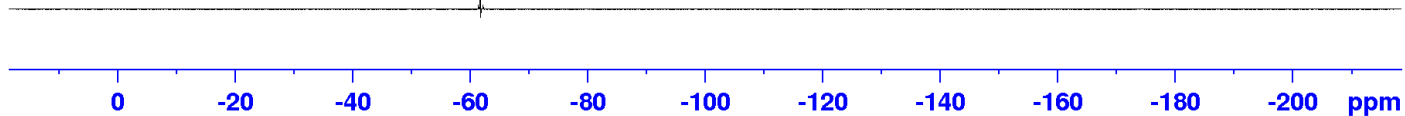

Current Data Parameters  
 NAME CAD-1-09  
 EXPNO 23  
 PROCNO 1

F2 - Acquisition Parameters  
 Date\_ 20191105  
 Time 14.53 h  
 INSTRUM AVIII\_400  
 PROBHD Z108618\_0146 (  
 PULPROG zg  
 TD 261992  
 SOLVENT DMSO  
 NS 16  
 DS 4  
 SWH 89285.711 Hz  
 FIDRES 0.681591 Hz  
 AQ 1.4671552 sec  
 RG 575  
 DW 5.600 usec  
 DE 7.11 usec  
 TE 300.0 K  
 D1 1.00000000 sec  
 TD0 1  
 SFO1 376.4418995 MHz  
 NUC1 19F  
 P1 11.80 usec  
 PLW1 32.96500015 W

F2 - Processing parameters  
 SI 262144  
 SF 376.4795470 MHz  
 WDW EM  
 SSB 0  
 LB 0.30 Hz  
 GB 0  
 PC 1.00

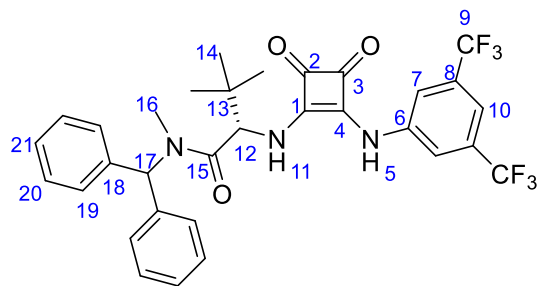

C3

<sup>1</sup>H NMR

400 MHz

CDCl<sub>3</sub>

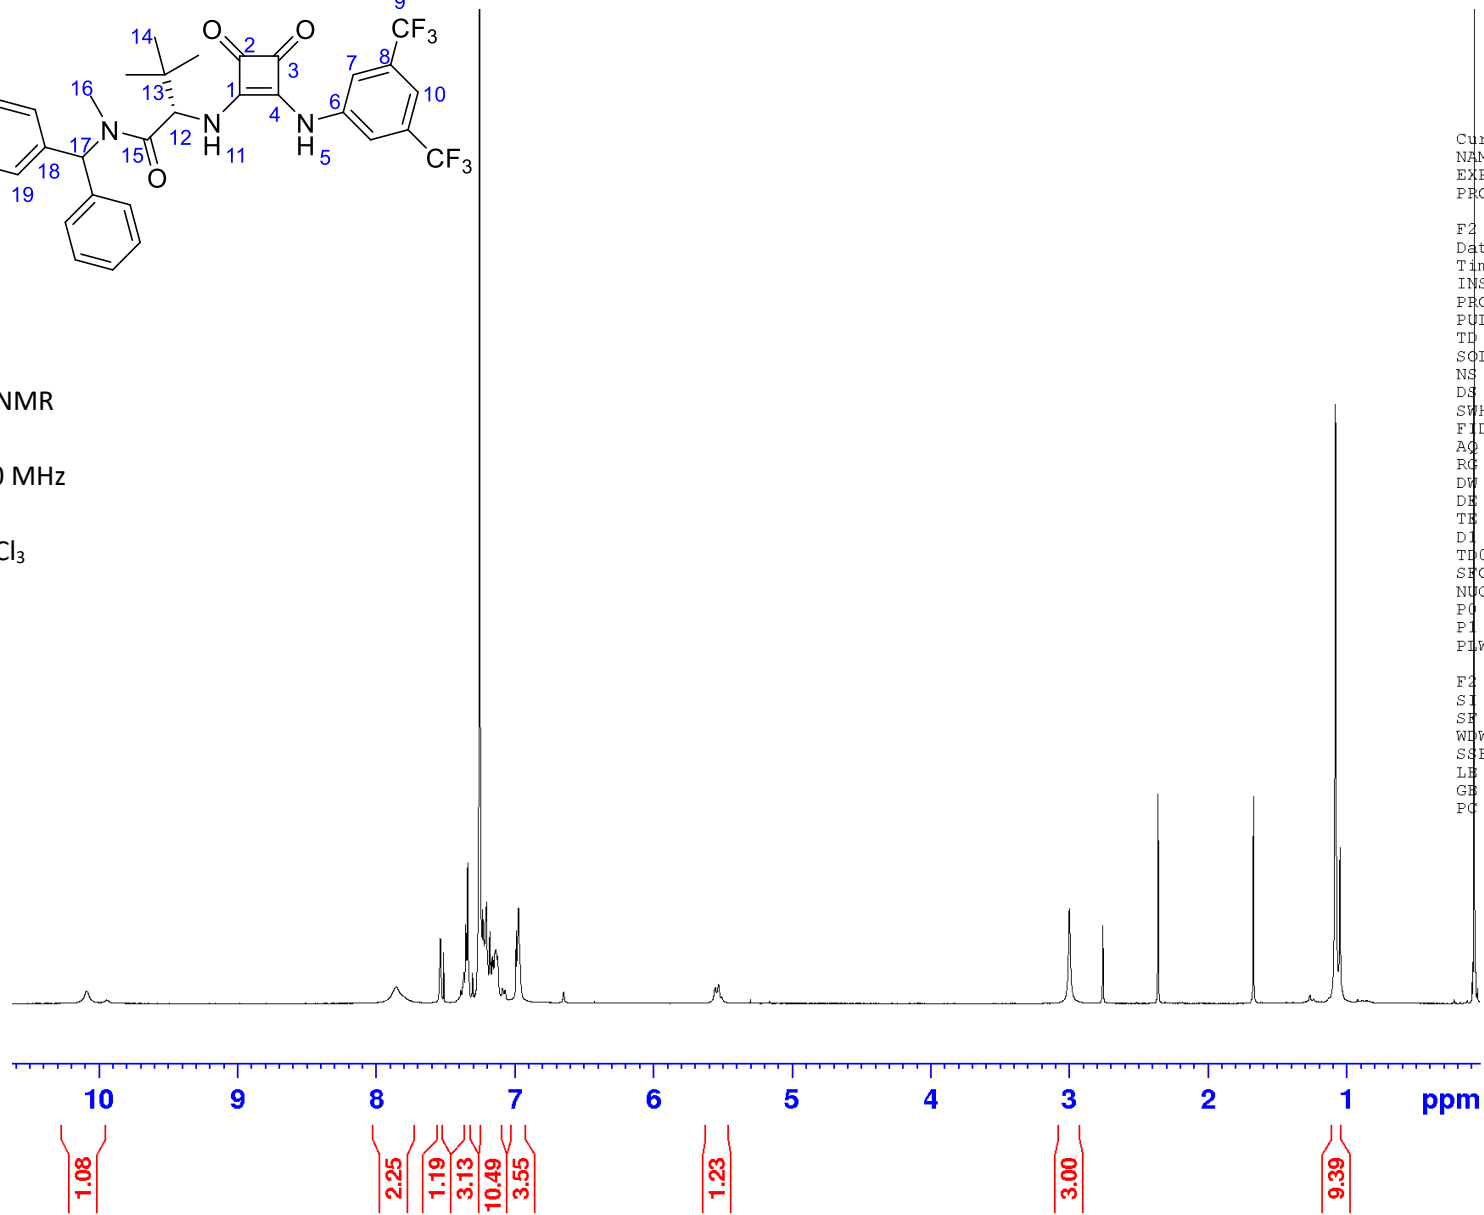

Current Data Parameters  
 NAME CAD-1-11 15-28 crystals  
 EXPNO 10  
 PROCNO 1

F2 - Acquisition Parameters  
 Date\_ 20200309  
 Time 18.06 h  
 INSTRUM AVIII\_400  
 PROBHD Z108618\_0146 (  
 PULPROG zg30  
 TD 65536  
 SOLVENT CDC13  
 NS 32  
 DS 2  
 SWH 8223.685 Hz  
 FIDRES 0.250967 Hz  
 AQ 3.9845889 sec  
 RG 114  
 DW 60.800 usec  
 DE 17.42 usec  
 TE 300.0 K  
 DI 1.00000000 sec  
 TDO 1  
 SF01 400.1124708 MHz  
 NUC1 1H  
 PC 5.00 usec  
 P1 15.00 usec  
 PLW1 17.29199982 W

F2 - Processing parameters  
 SI 32768  
 SF 400.1100109 MHz  
 WDW EM  
 SSB 0  
 LB 0.30 Hz  
 GB 0  
 PC 1.00

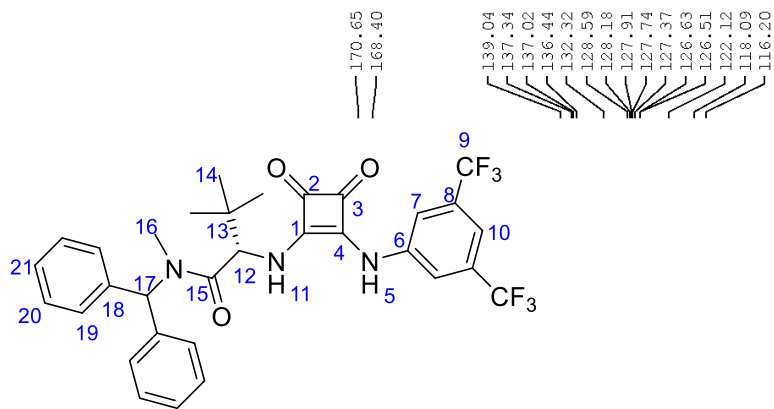

C3

<sup>13</sup>C NMR

101 MHz

CDCl<sub>3</sub>

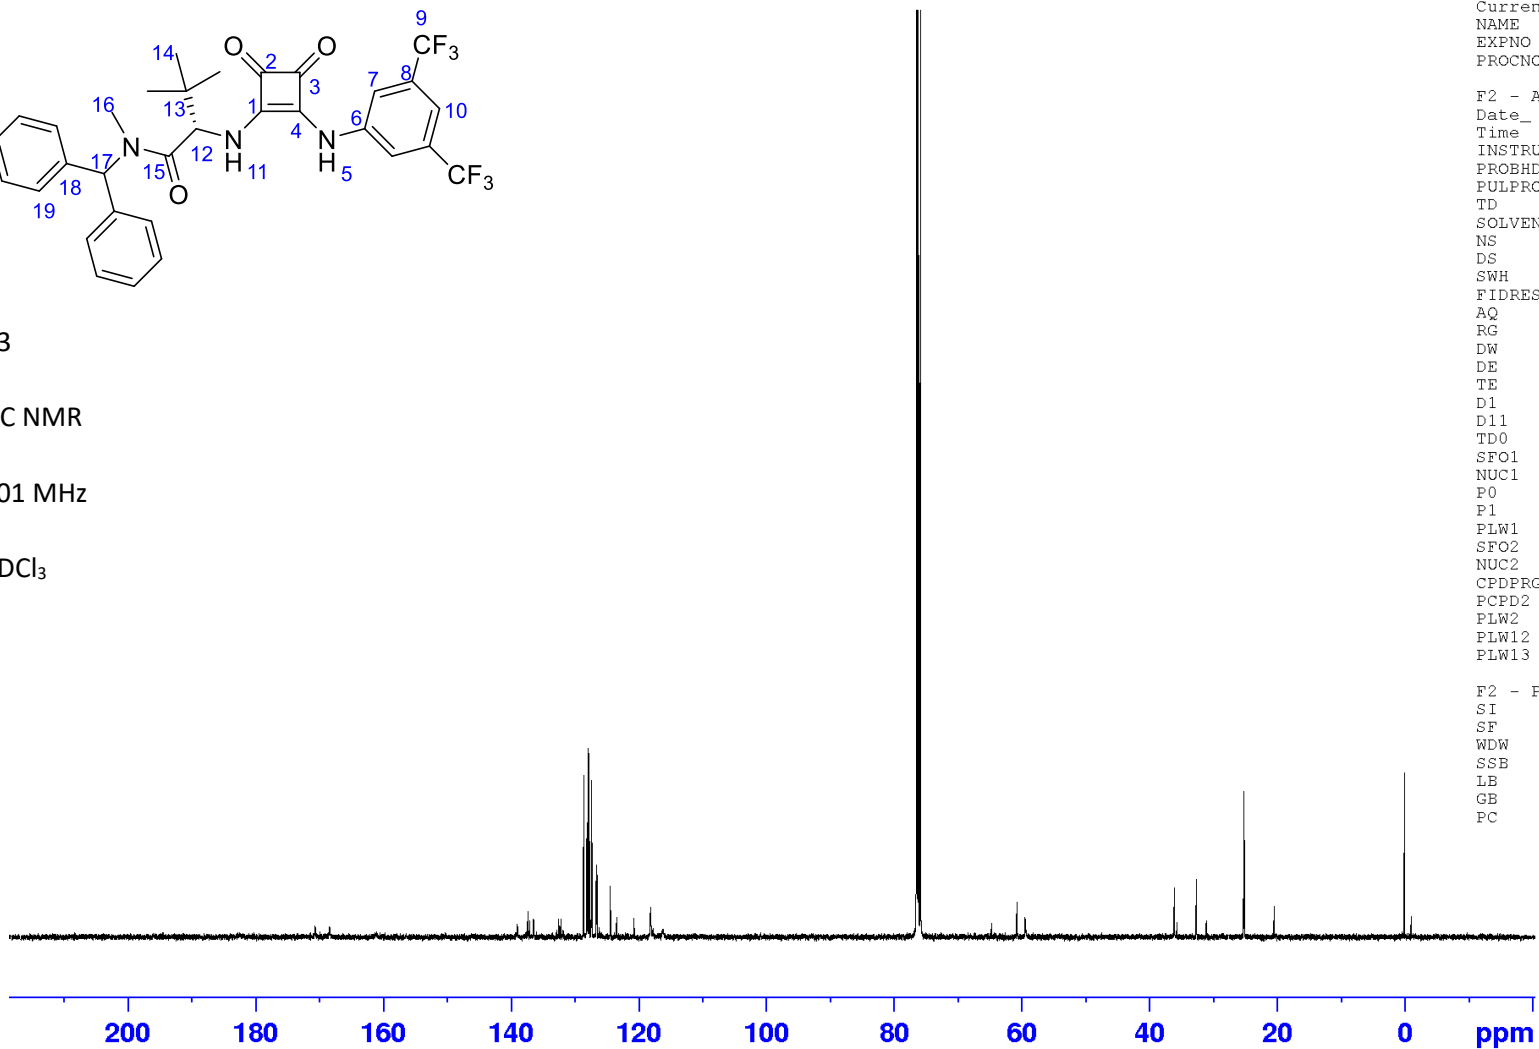

Current Data Parameters  
 NAME CAD-1-11 15-28 crystals  
 EXPNO 13  
 PROCNO 1

F2 - Acquisition Parameters  
 Date\_ 20200309  
 Time 23.41 h  
 INSTRUM AVIII\_400  
 PROBHD Z108618\_0146 ( )  
 PULPROG zgpg30  
 TD 96150  
 SOLVENT CDCl3  
 NS 4096  
 DS 4  
 SWH 24038.461 Hz  
 FIDRES 0.500020 Hz  
 AQ 1.9999200 sec  
 RG 2050  
 DW 20.800 usec  
 DE 6.50 usec  
 TE 300.0 K  
 D1 1.00000000 sec  
 D11 0.03000000 sec  
 TD0 1  
 SFO1 100.6178003 MHz  
 NUC1 13C  
 P0 3.00 usec  
 P1 9.00 usec  
 PLW1 96.68000031 W  
 SFO2 400.1116004 MHz  
 NUC2 1H  
 CPDPRG[2] waltz64  
 PCPD2 90.00 usec  
 PLW2 17.29199982 W  
 PLW12 0.48032999 W  
 PLW13 0.24160001 W

F2 - Processing parameters  
 SI 131072  
 SF 100.6078265 MHz  
 WDW EM  
 SSB 0  
 LB 1.00 Hz  
 GB 0  
 PC 1.40



C3

<sup>19</sup>F NMR

376 MHz

CDCl<sub>3</sub>

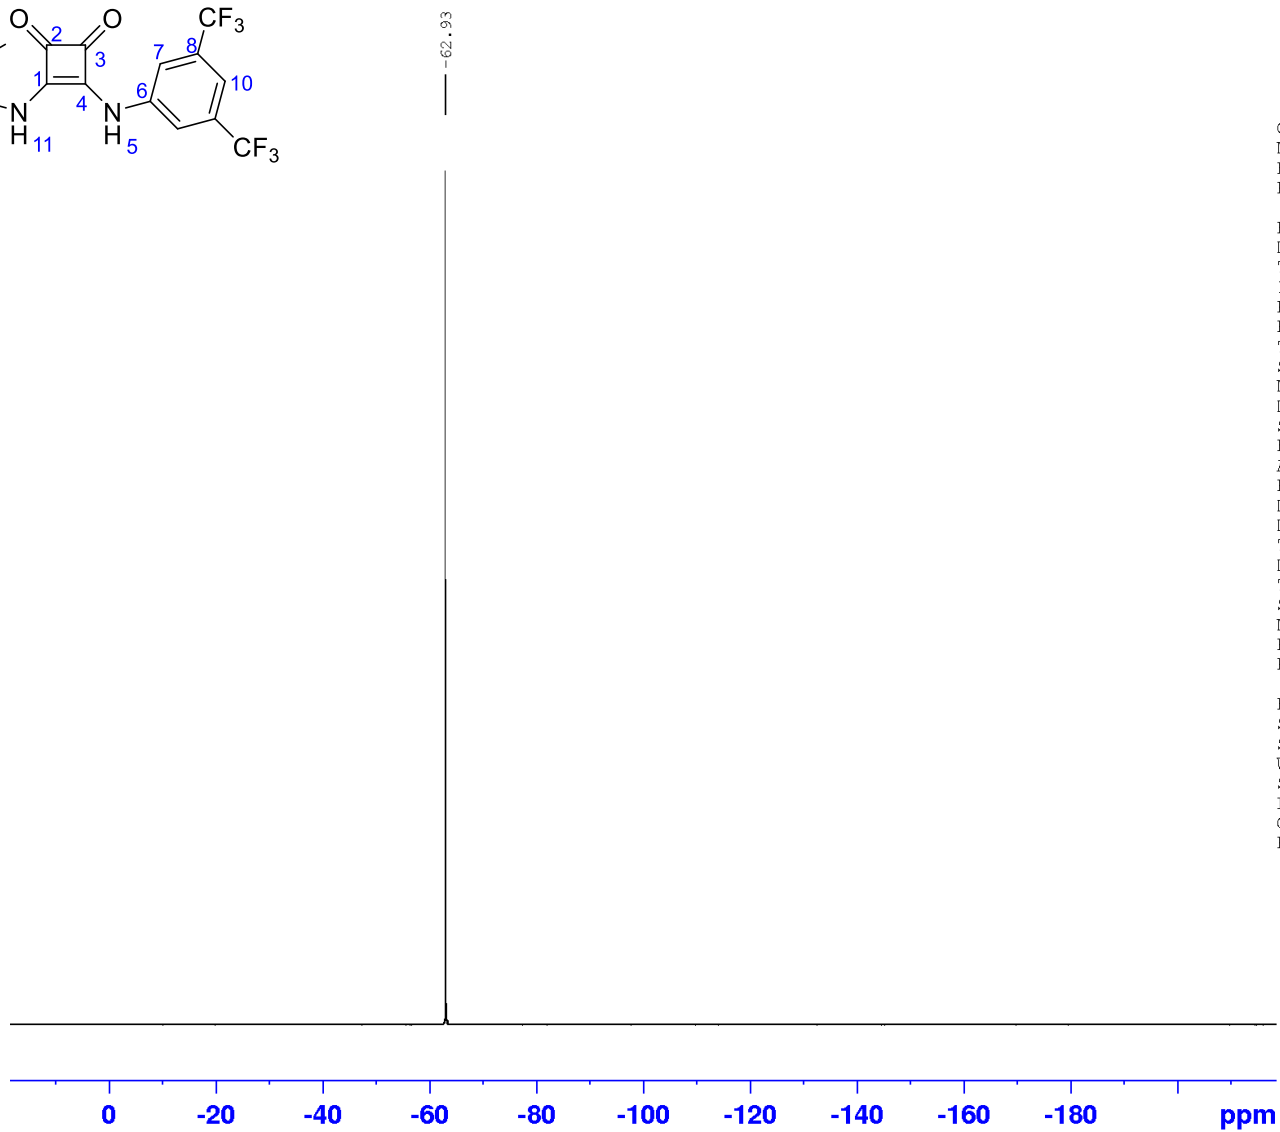

Current Data Parameters  
 NAME CAD-1-11C 29-77  
 EXPNO 15  
 PROCNO 1

F2 - Acquisition Parameters  
 Date\_ 20191205  
 Time\_ 17.39 h  
 INSTRUM AVIII\_400  
 PROBHD Z108618\_0146 (  
 PULPROG zg  
 TD 261992  
 SOLVENT CDCl3  
 NS 16  
 DS 4  
 SWH 89285.711 Hz  
 FIDRES 0.681591 Hz  
 AQ 1.4671552 sec  
 RG 645  
 DW 5.600 usec  
 DE 7.11 usec  
 TE 300.0 K  
 D1 1.00000000 sec  
 TD0 1  
 SFO1 376.4418995 MHz  
 NUC1 19F  
 P1 11.80 usec  
 PLW1 32.96500015 W

F2 - Processing parameters  
 SI 262144  
 SF 376.4795470 MHz  
 WDW EM  
 SSB 0  
 LB 0.30 Hz  
 GB 0  
 PC 1.00

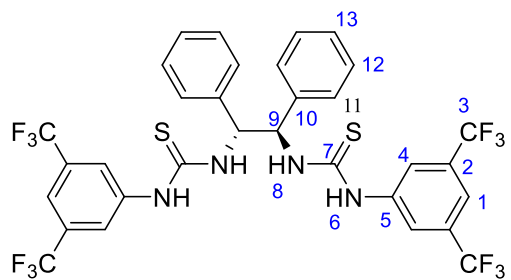

C4

<sup>1</sup>H NMR

400 MHz

DMSO-d<sub>6</sub>

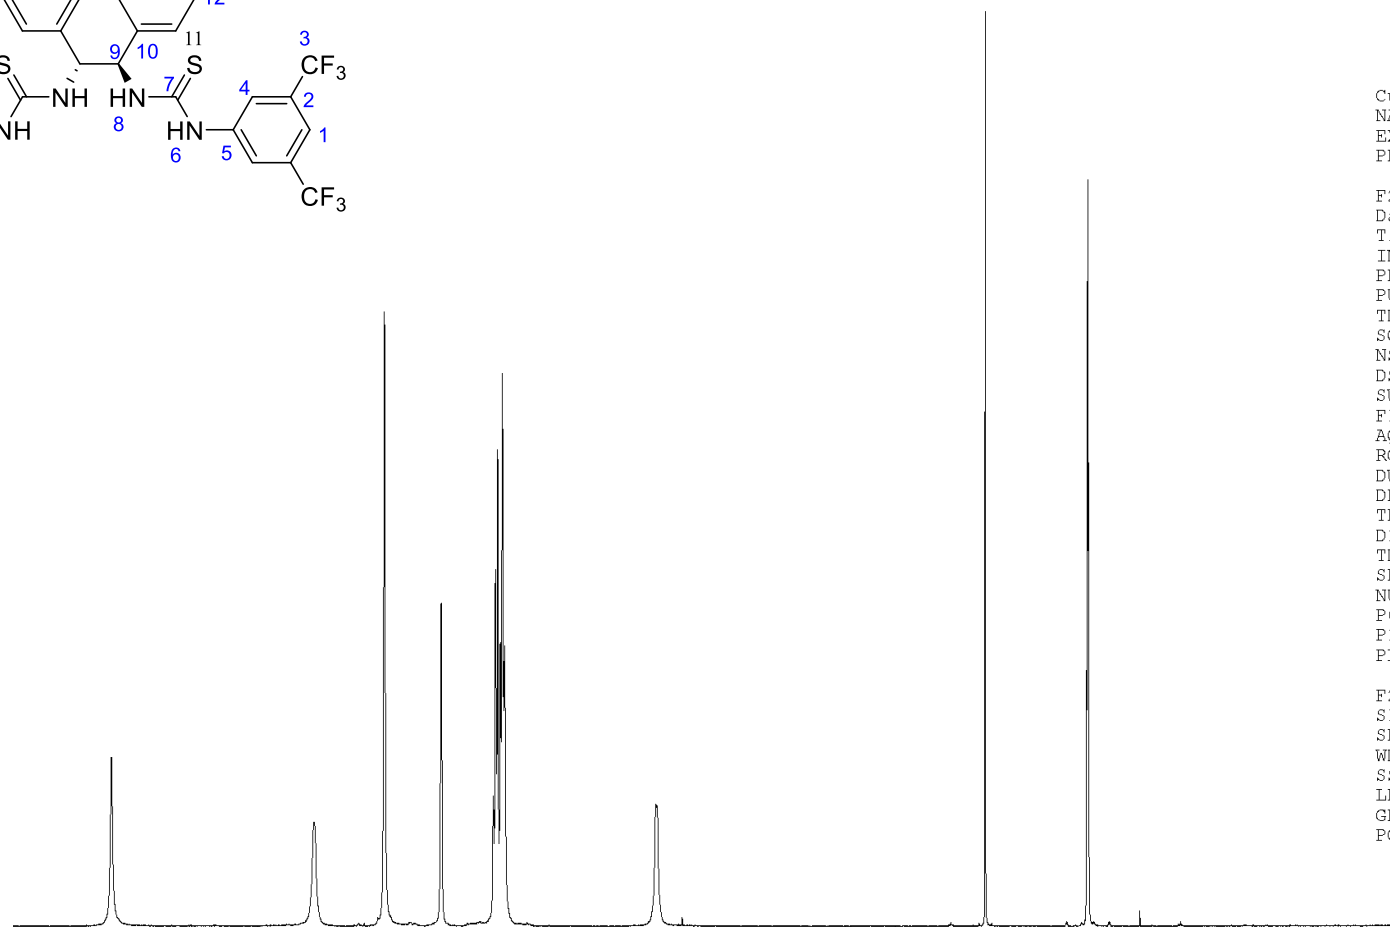

11 10 9 8 7 6 5 4 3 2 1 ppm

2.00 1.93 4.08 2.02 10.66 2.01

Current Data Parameters  
 NAME CAD-1-10B  
 EXPNO 10  
 PROCNO 1

F2 - Acquisition Parameters  
 Date\_ 20191112  
 Time 12.35 h  
 INSTRUM AVIII\_400  
 PROBHD Z108618\_0146 (  
 PULPROG zg30  
 TD 65536  
 SOLVENT DMSO  
 NS 16  
 DS 2  
 SWH 8223.685 Hz  
 FIDRES 0.250967 Hz  
 AQ 3.9845889 sec  
 RG 256  
 DW 60.800 usec  
 DE 17.42 usec  
 TE 300.0 K  
 D1 1.00000000 sec  
 TD0 1  
 SFO1 400.1124708 MHz  
 NUC1 1H  
 P0 5.00 usec  
 P1 15.00 usec  
 PLW1 17.29199982 W

F2 - Processing parameters  
 SI 32768  
 SF 400.1100032 MHz  
 WDW EM  
 SSB 0  
 LB 0.30 Hz  
 GB 0  
 PC 1.00

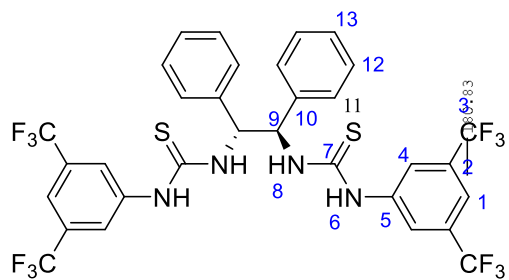

C4

<sup>13</sup>C NMR

101 MHz

DMSO-d6

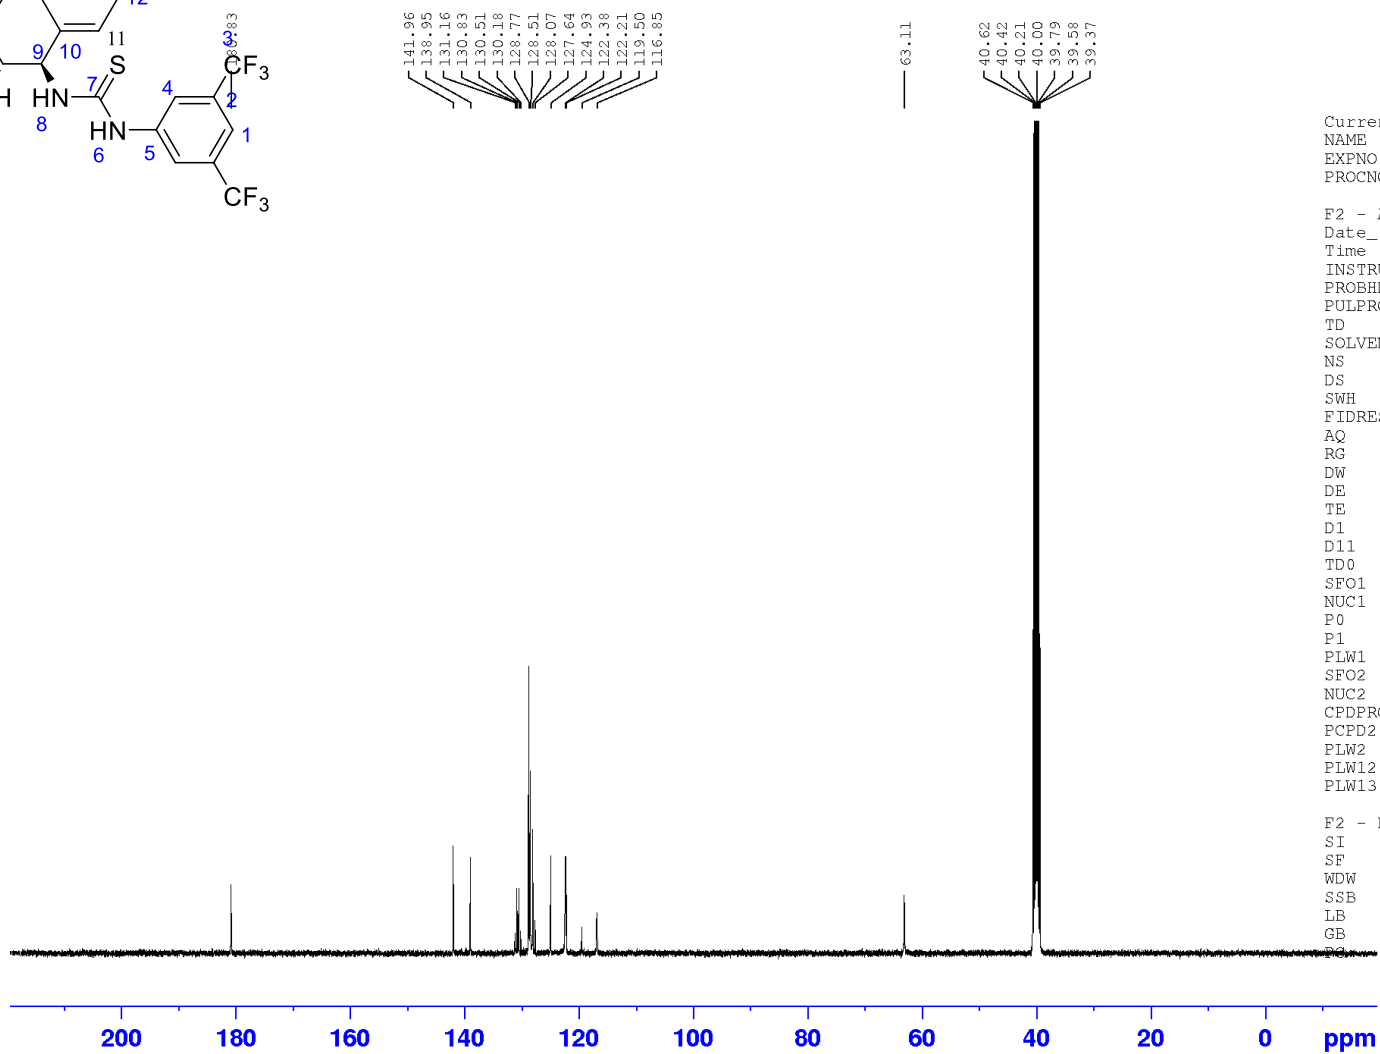

Current Data Parameters  
 NAME CAD-1-10B  
 EXPNO 18  
 PROCNO 1

F2 - Acquisition Parameters  
 Date\_ 20191115  
 Time 2.50 h  
 INSTRUM AVIII\_400  
 PROBHD Z108618\_0146 (  
 PULPROG zgpg30  
 TD 96150  
 SOLVENT DMSO  
 NS 4096  
 DS 4  
 SWH 24038.461 Hz  
 FIDRES 0.500020 Hz  
 AQ 1.9999200 sec  
 RG 1620  
 DW 20.800 usec  
 DE 6.50 usec  
 TE 300.0 K  
 D1 1.00000000 sec  
 D11 0.03000000 sec  
 TD0 1  
 SFO1 100.6178003 MHz  
 NUC1 13C  
 P0 3.00 usec  
 P1 9.00 usec  
 PLW1 96.68000031 W  
 SFO2 400.1116004 MHz  
 NUC2 1H  
 CPDPRG[2] waltz64  
 PCPD2 90.00 usec  
 PLW2 17.29199982 W  
 PLW12 0.48032999 W  
 PLW13 0.24160001 W

F2 - Processing parameters  
 SI 131072  
 SF 100.6077400 MHz  
 WDW EM  
 SSB 0  
 LB 1.00 Hz  
 GB 0  
 PC 1.40



C4

<sup>19</sup>F NMR

376 MHz

DMSO-d6

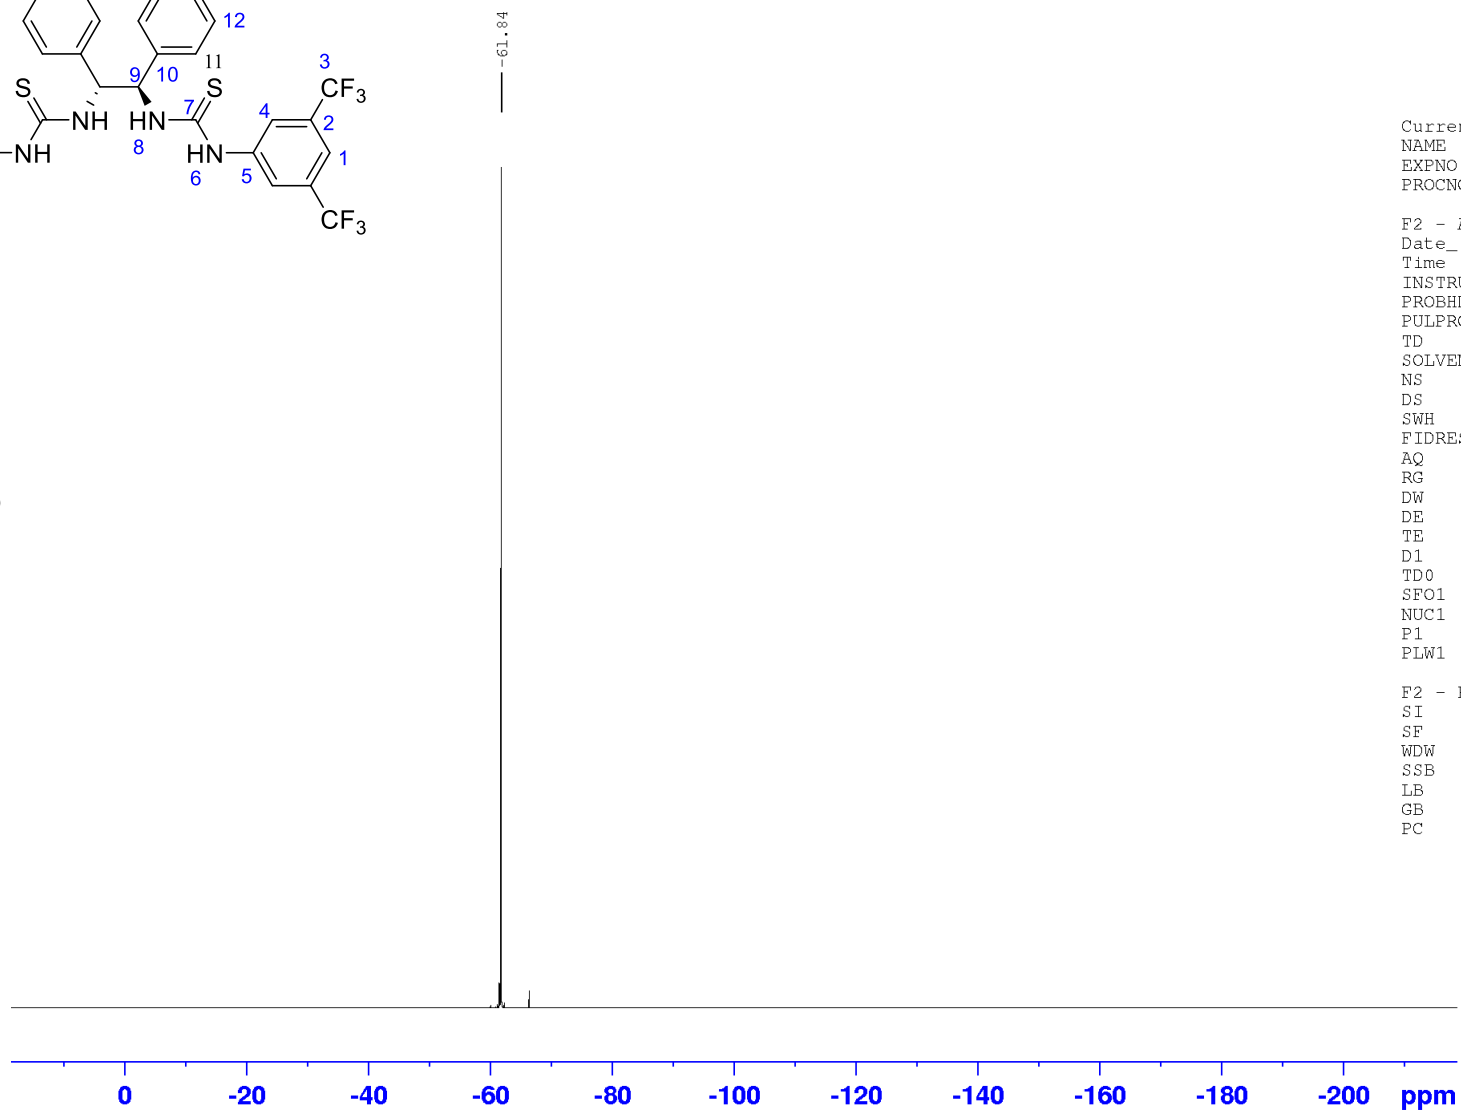

Current Data Parameters  
 NAME CAD-1-10  
 EXPNO 13  
 PROCNO 1

F2 - Acquisition Parameters  
 Date\_ 20191107  
 Time 12.50 h  
 INSTRUM AVIII\_400  
 PROBHD Z108618\_0146 (  
 PULPROG zg  
 TD 261992  
 SOLVENT DMSO  
 NS 16  
 DS 4  
 SWH 89285.711 Hz  
 FIDRES 0.681591 Hz  
 AQ 1.4671552 sec  
 RG 90.5  
 DW 5.600 usec  
 DE 7.11 usec  
 TE 300.0 K  
 D1 1.00000000 sec  
 TD0 1  
 SFO1 376.4418995 MHz  
 NUC1 19F  
 P1 11.80 usec  
 PLW1 32.96500015 W

F2 - Processing parameters  
 SI 262144  
 SF 376.4795470 MHz  
 WDW EM  
 SSB 0  
 LB 0.30 Hz  
 GB 0  
 PC 1.00

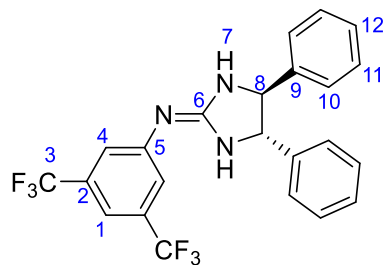

C5

<sup>1</sup>H NMR

400 MHz

DMSO-d6

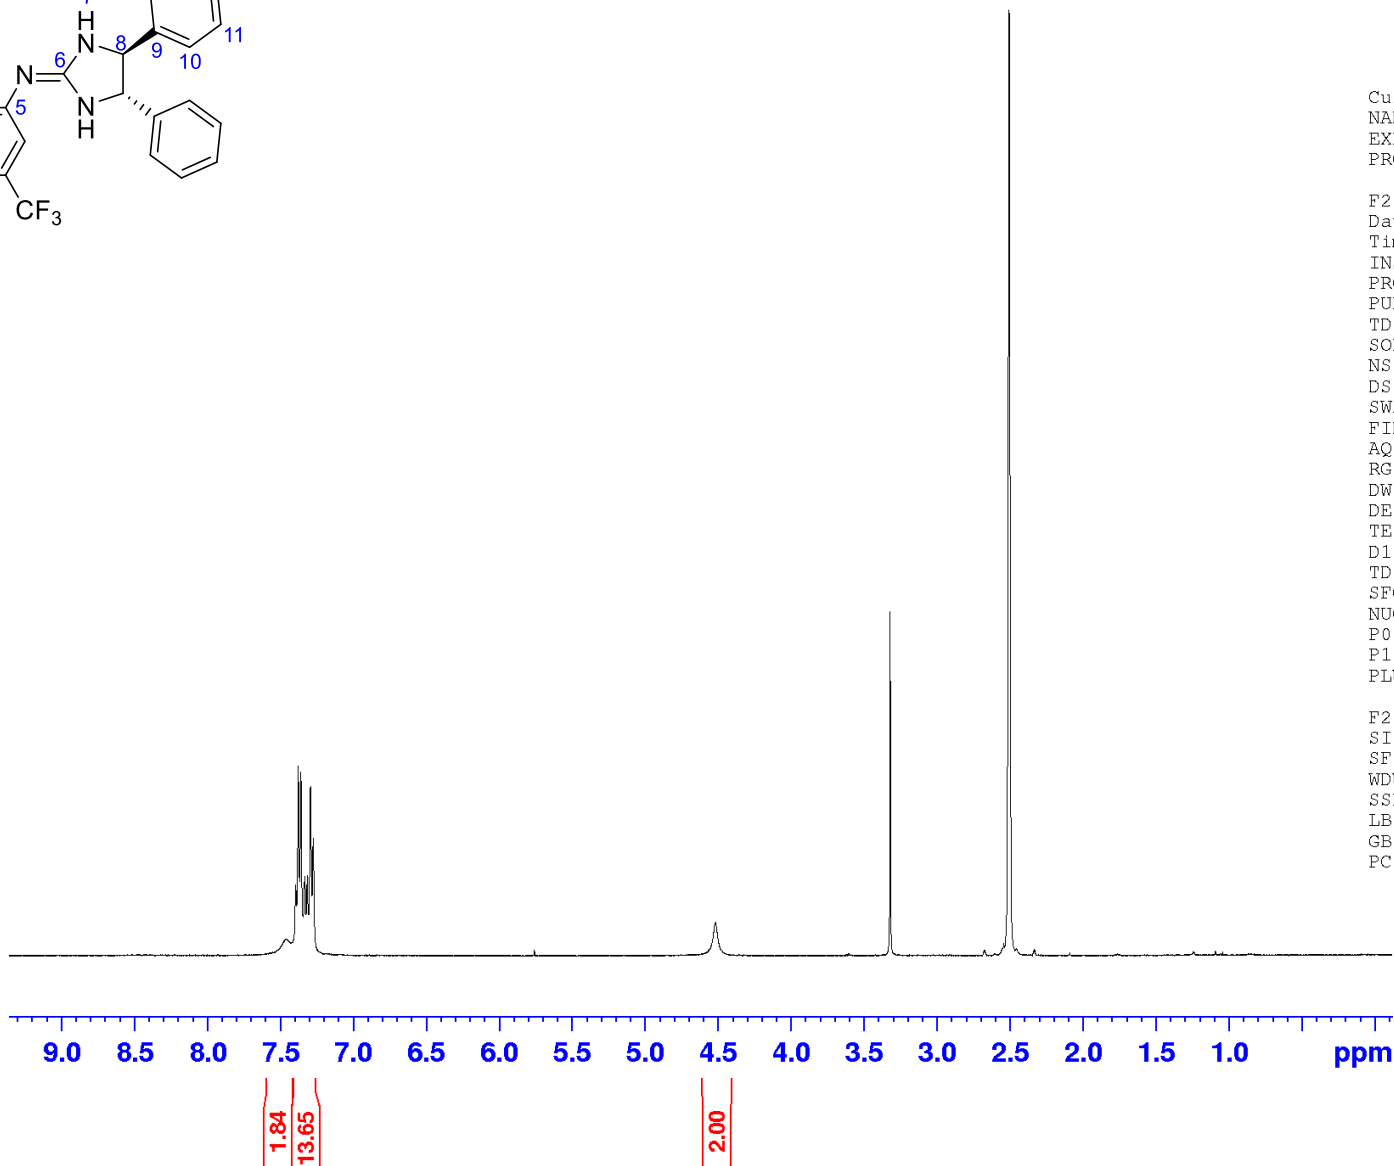

Current Data Parameters  
 NAME CAD-1-14B  
 EXPNO 10  
 PROCNO 1

F2 - Acquisition Parameters  
 Date\_ 20200122  
 Time 15.46 h  
 INSTRUM AVIII\_400  
 PROBHD Z108618\_0146 (  
 PULPROG zg30  
 TD 65536  
 SOLVENT DMSO  
 NS 32  
 DS 2  
 SWH 8223.685 Hz  
 FIDRES 0.250967 Hz  
 AQ 3.9845889 sec  
 RG 256  
 DW 60.800 usec  
 DE 17.42 usec  
 TE 300.0 K  
 D1 1.00000000 sec  
 TD0 1  
 SFO1 400.1124708 MHz  
 NUC1 1H  
 P0 5.00 usec  
 P1 15.00 usec  
 PLW1 17.29199982 W

F2 - Processing parameters  
 SI 32768  
 SF 400.1100034 MHz  
 WDW EM  
 SSB 0  
 LB 0.30 Hz  
 GB 0  
 PC 1.00





C5

<sup>13</sup>C NMR

101 MHz

DMSO-d6

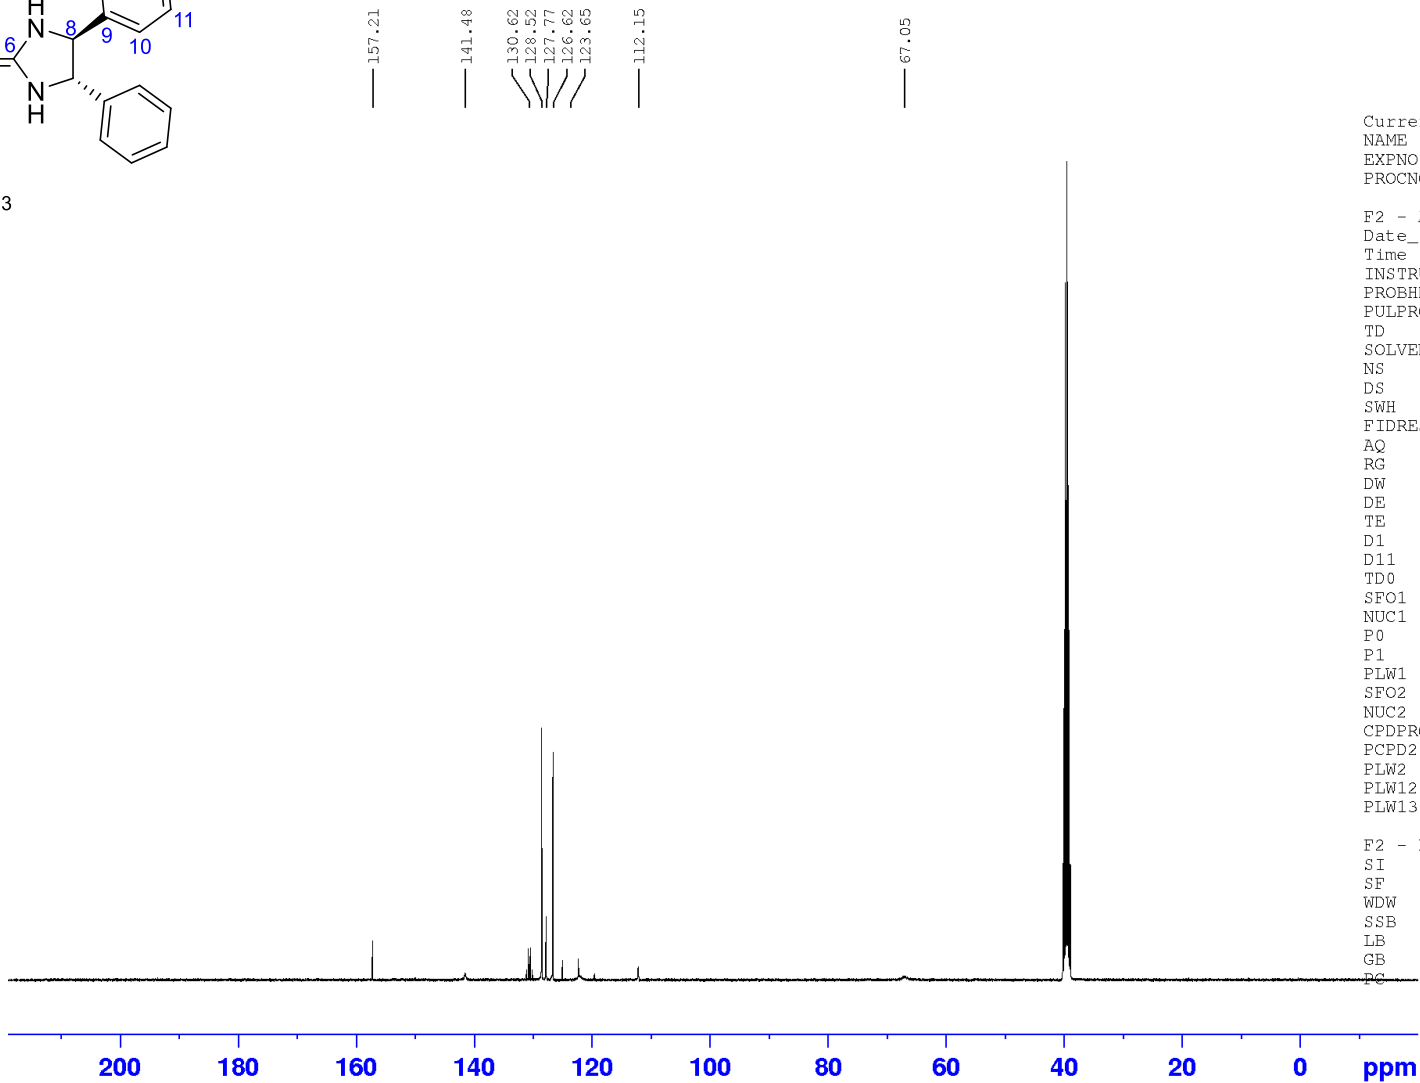

Current Data Parameters  
 NAME CAD-1-14C  
 EXPNO 14  
 PROCNO 1

F2 - Acquisition Parameters  
 Date\_ 20200130  
 Time 4.53 h  
 INSTRUM AVIII\_400  
 PROBHD Z108618\_0146 (  
 PULPROG zgpg30  
 TD 96150  
 SOLVENT DMSO  
 NS 4096  
 DS 4  
 SWH 24038.461 Hz  
 FIDRES 0.500020 Hz  
 AQ 1.9999200 sec  
 RG 912  
 DW 20.800 usec  
 DE 6.50 usec  
 TE 300.0 K  
 D1 1.00000000 sec  
 D11 0.03000000 sec  
 TD0 1  
 SFO1 100.6178003 MHz  
 NUC1 13C  
 P0 3.00 usec  
 P1 9.00 usec  
 PLW1 96.68000031 W  
 SFO2 400.1116004 MHz  
 NUC2 1H  
 CPDPRG[2] waltz64  
 PCPD2 90.00 usec  
 PLW2 17.29199982 W  
 PLW12 0.48032999 W  
 PLW13 0.24160001 W

F2 - Processing parameters  
 SI 131072  
 SF 100.6077874 MHz  
 WDW EM  
 SSB 0  
 LB 1.00 Hz  
 GB 0  
 PC 1.40



C5

<sup>19</sup>F NMR

376 MHz

DMSO-d<sup>6</sup>

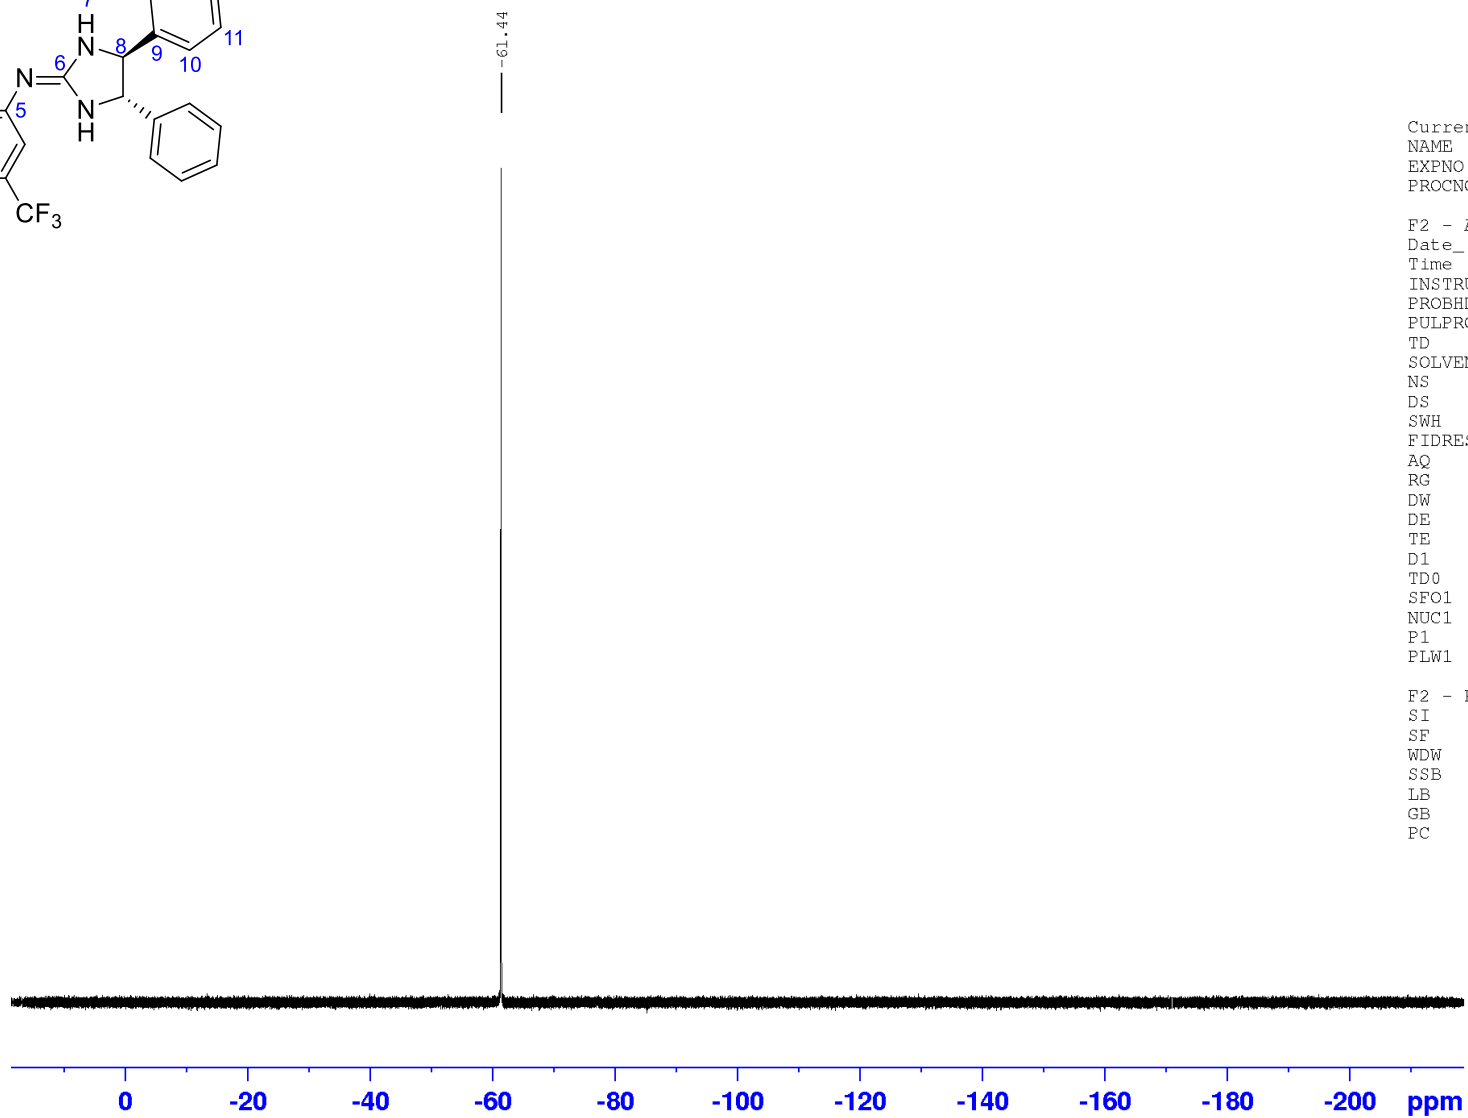

Current Data Parameters  
 NAME CAD-1-14B  
 EXPNO 11  
 PROCNO 1

F2 - Acquisition Parameters  
 Date\_ 20200122  
 Time 16.53 h  
 INSTRUM AVIII\_400  
 PROBHD Z108618\_0146 {  
 PULPROG zg  
 TD 261992  
 SOLVENT DMSO  
 NS 16  
 DS 4  
 SWH 89285.711 Hz  
 FIDRES 0.681591 Hz  
 AQ 1.4671552 sec  
 RG 512  
 DW 5.600 usec  
 DE 7.11 usec  
 TE 300.0 K  
 D1 1.00000000 sec  
 TD0 1  
 SFO1 376.4418995 MHz  
 NUC1 19F  
 P1 11.80 usec  
 PLW1 32.96500015 W

F2 - Processing parameters  
 SI 262144  
 SF 376.4795470 MHz  
 WDW EM  
 SSB 0  
 LB 0.30 Hz  
 GB 0  
 PC 1.00

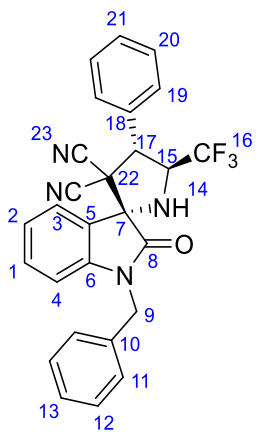

3a

Major diastereomer

$^1\text{H}$  NMR

400 MHz

$\text{CDCl}_3$

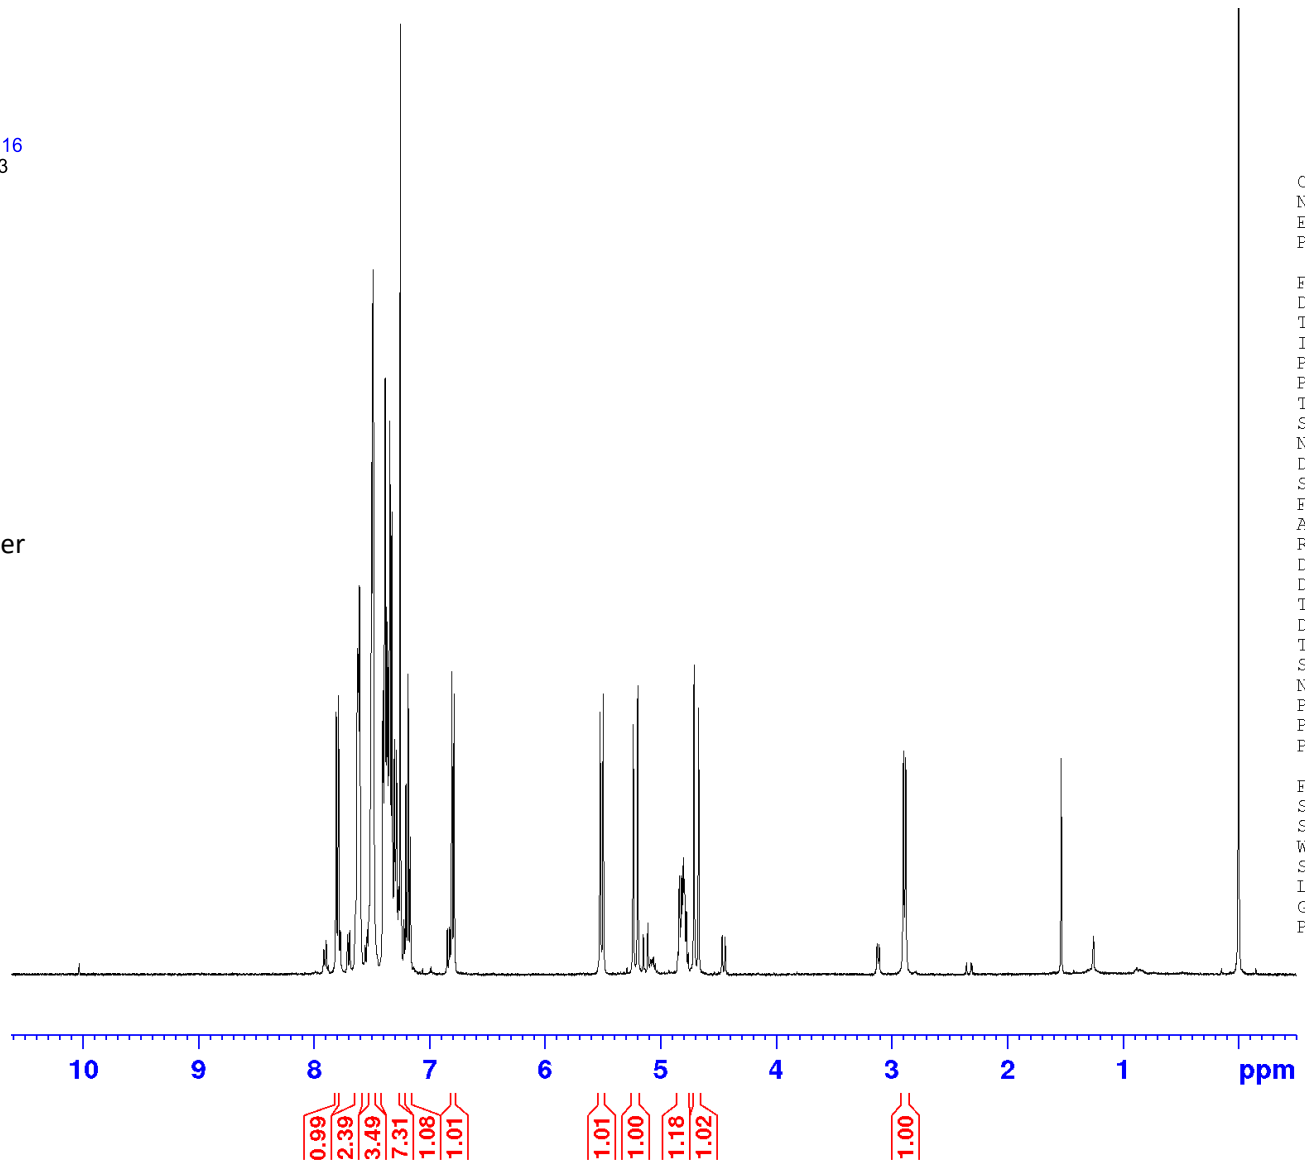

Current Data Parameters  
 NAME WR 2.176  
 EXPNO 10  
 PROCNO 1

F2 - Acquisition Parameters  
 Date\_ 20210614  
 Time 15.25 h  
 INSTRUM AVIII\_400  
 PROBHD Z108618\_0146 {  
 PULPROG zg30  
 TD 65536  
 SOLVENT CDCl3  
 NS 16  
 DS 2  
 SWH 8223.685 Hz  
 FIDRES 0.250967 Hz  
 AQ 3.9845889 sec  
 RG 256  
 DW 60.800 usec  
 DE 17.42 usec  
 TE 300.0 K  
 D1 1.00000000 sec  
 TDO 1  
 SFO1 400.1124708 MHz  
 NUC1 1H  
 P0 5.00 usec  
 P1 15.00 usec  
 PLW1 17.29199982 W

F2 - Processing parameters  
 SI 32768  
 SF 400.1100113 MHz  
 WDW EM  
 SSB 0  
 LB 0.30 Hz  
 GB 0  
 PC 1.00

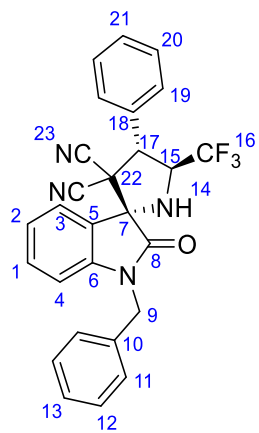

3a

Major diastereomer

<sup>13</sup>C NMR

101 MHz

CDCl<sub>3</sub>

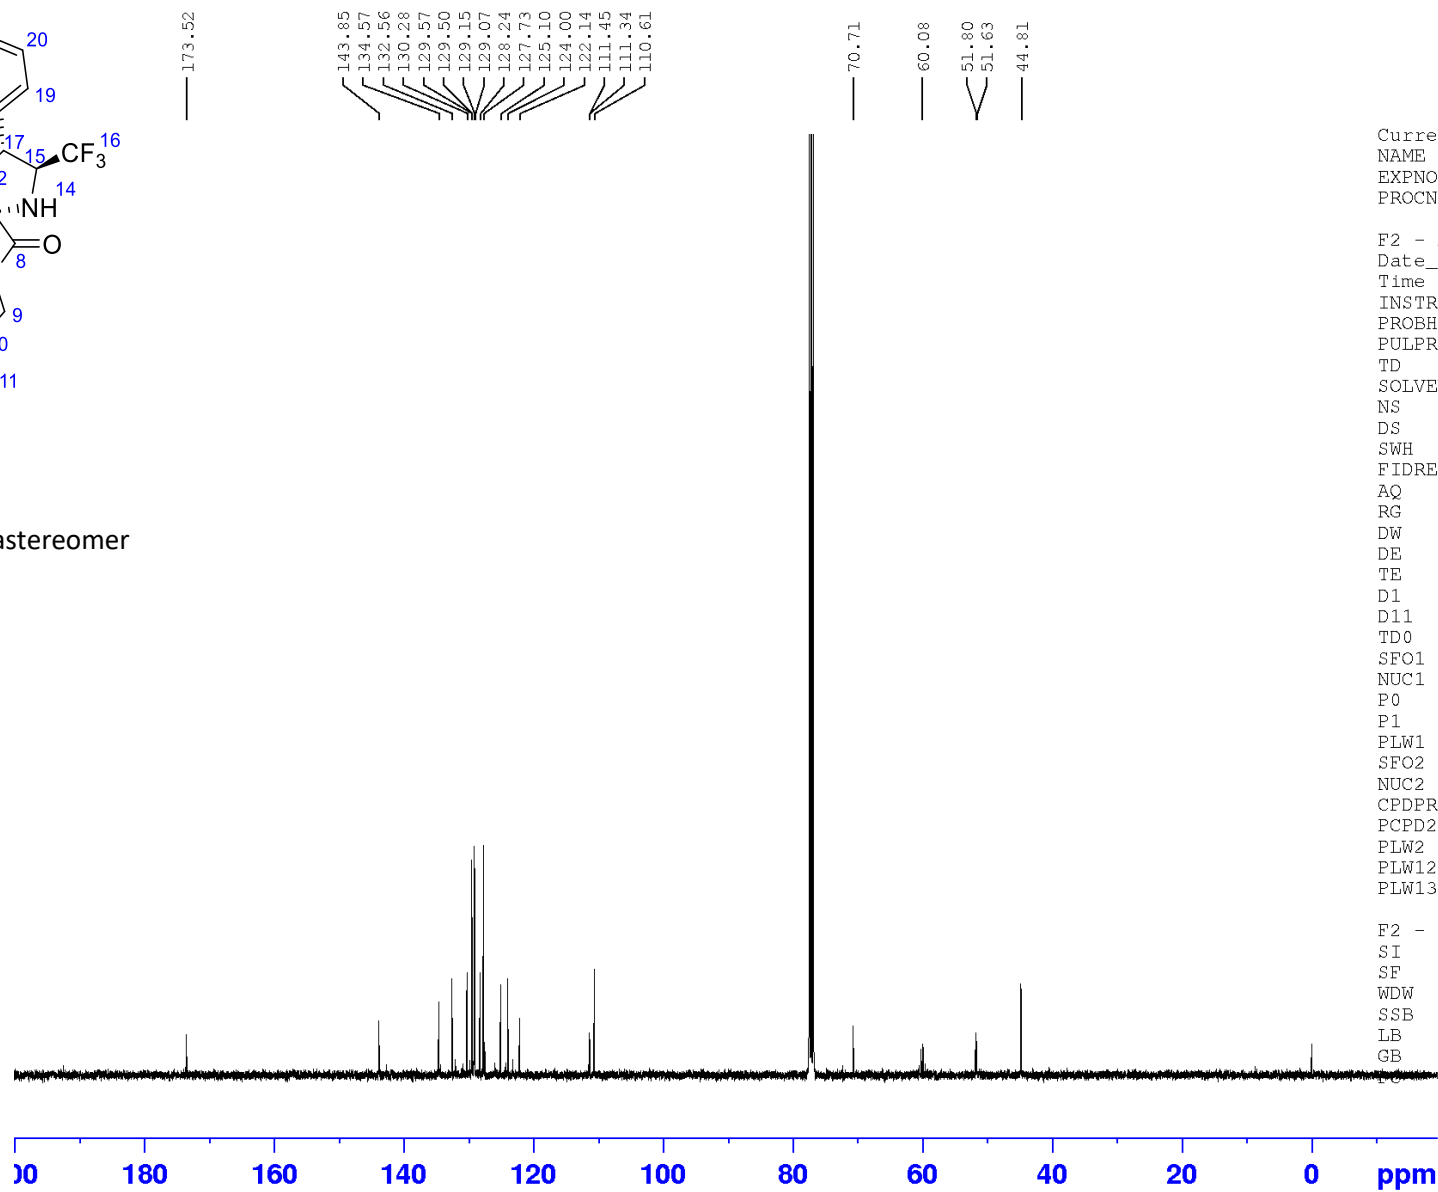

Current Data Parameters  
NAME WR 2.176  
EXPNO 20  
PROCNO 1

F2 - Acquisition Parameters  
Date\_ 20210715  
Time 19.42 h  
INSTRUM AVIII\_400  
PROBHD Z108618\_0146 (  
PULPROG zgpg30  
TD 96150  
SOLVENT CDCl3  
NS 2048  
DS 4  
SWH 24038.461 Hz  
FIDRES 0.500020 Hz  
AQ 1.9999200 sec  
RG 2050  
DW 20.800 usec  
DE 6.50 usec  
TE 300.0 K  
D1 1.00000000 sec  
D11 0.03000000 sec  
TD0 1  
SFO1 100.6178003 MHz  
NUC1 13C  
P0 3.00 usec  
P1 9.00 usec  
PLW1 96.68000031 W  
SFO2 400.1116004 MHz  
NUC2 1H  
CPDPRG[2] waltz64  
PCPD2 90.00 usec  
PLW2 17.29199982 W  
PLW12 0.48032999 W  
PLW13 0.24160001 W

F2 - Processing parameters  
SI 131072  
SF 100.6077257 MHz  
WDW EM  
SSB 0  
LB 1.00 Hz  
GB 0  
PC 1.40



3a

Major diastereomer

<sup>19</sup>F NMR

376 MHz

CDCl<sub>3</sub>

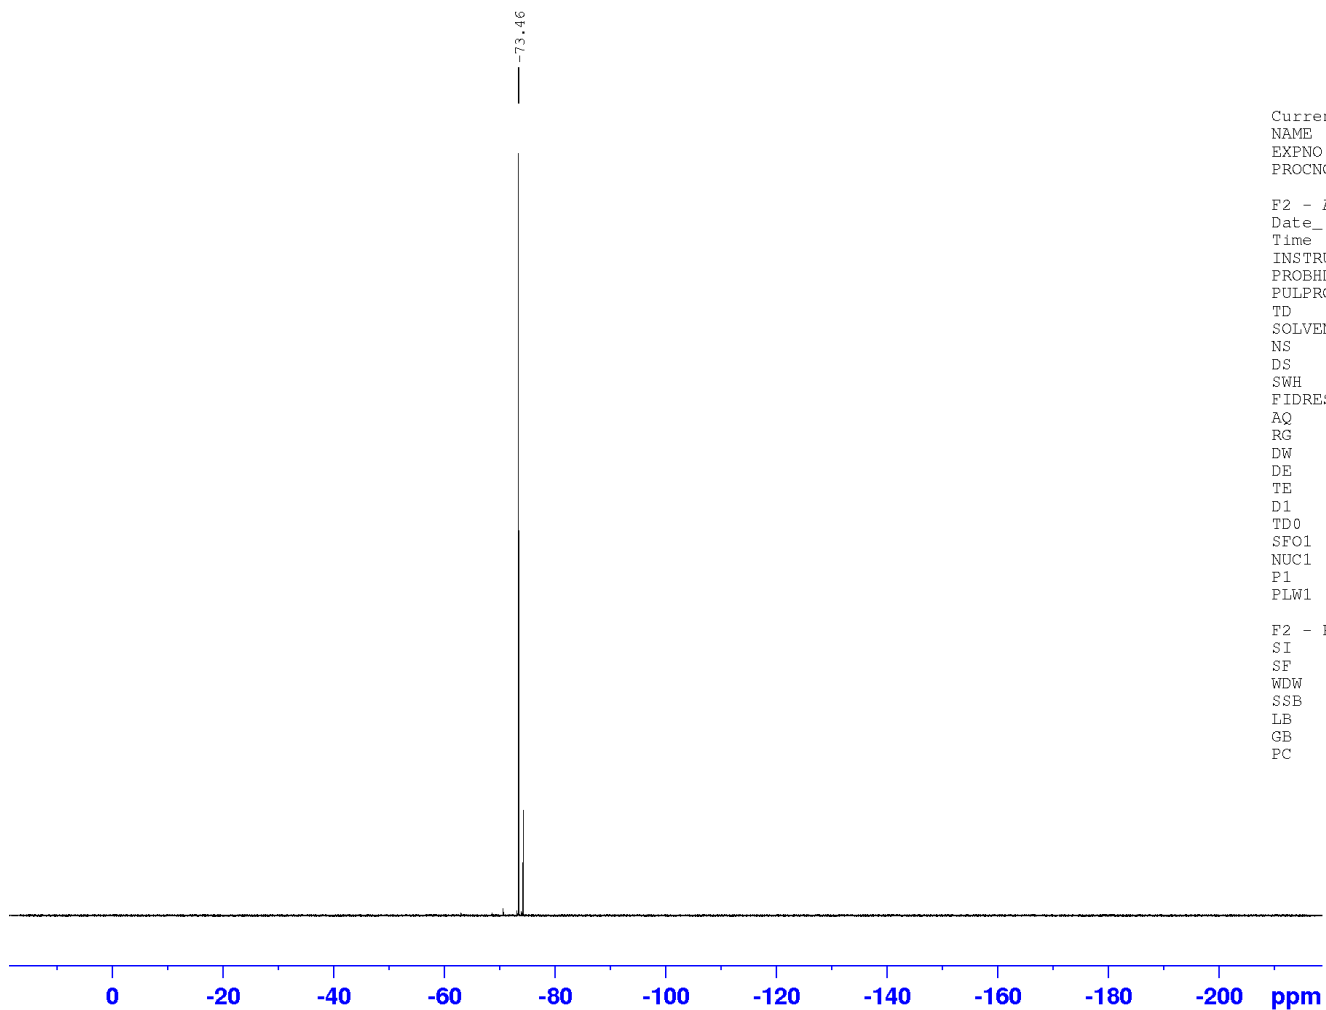

Current Data Parameters  
 NAME WR 2.176  
 EXPNO 11  
 PROCNO 1

F2 - Acquisition Parameters  
 Date\_ 20210614  
 Time 15.29 h  
 INSTRUM AVIII\_400  
 PROBHD Z108618\_0146 ( )  
 PULPROG zg  
 TD 261992  
 SOLVENT CDCl3  
 NS 16  
 DS 4  
 SWH 89285.711 Hz  
 FIDRES 0.681591 Hz  
 AQ 1.4671552 sec  
 RG 575  
 DW 5.600 usec  
 DE 7.11 usec  
 TE 300.0 K  
 D1 1.00000000 sec  
 TD0 1  
 SFO1 376.4418995 MHz  
 NUC1 19F  
 P1 11.80 usec  
 PLW1 32.96500015 W

F2 - Processing parameters  
 SI 262144  
 SF 376.4795470 MHz  
 WDW EM  
 SSB 0  
 LB 0.30 Hz  
 GB 0  
 PC 1.00

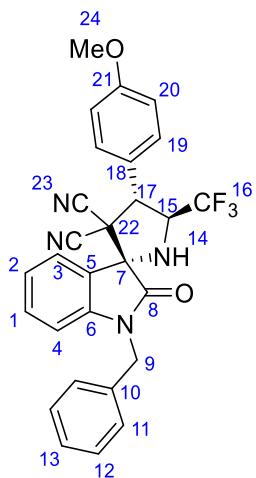

3b

Major diastereomer

<sup>1</sup>H NMR

400 MHz

CDCl<sub>3</sub>

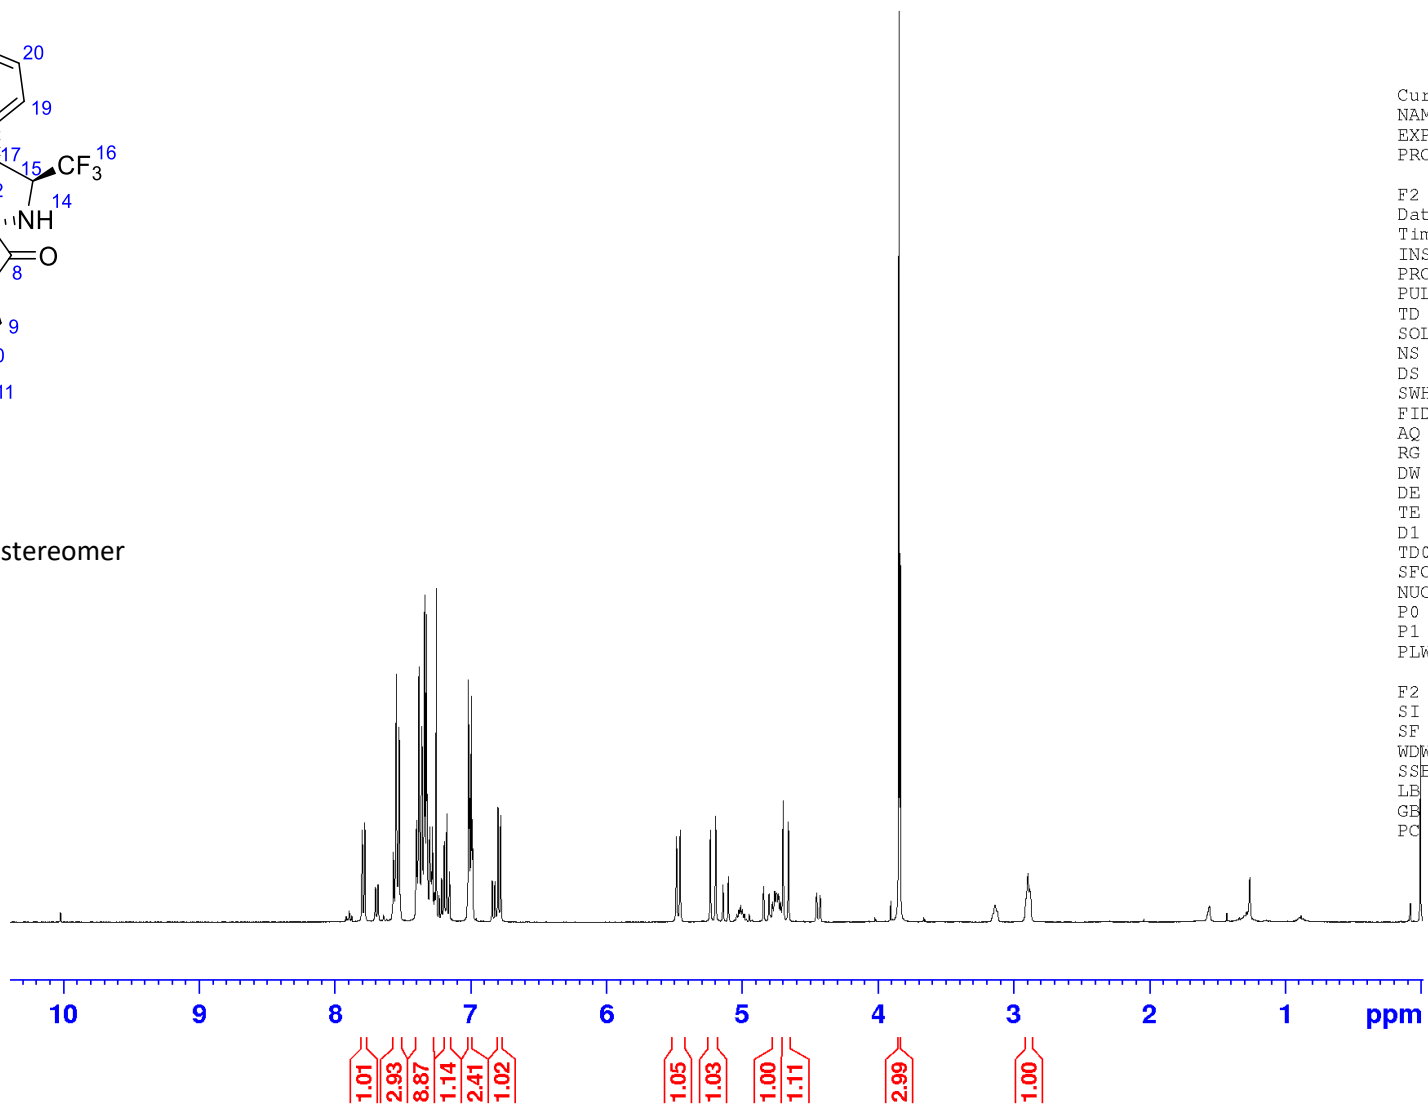

Current Data Parameters  
 NAME WR 2.174 (V3)  
 EXPNO 10  
 PROCNO 1

F2 - Acquisition Parameters  
 Date\_ 20210624  
 Time 14.09 h  
 INSTRUM AVIII\_400  
 PROBHD Z108618\_0146 (  
 PULPROG zg30  
 TD 65536  
 SOLVENT CDCl3  
 NS 16  
 DS 2  
 SWH 8223.685 Hz  
 FIDRES 0.250967 Hz  
 AQ 3.9845889 sec  
 RG 144  
 DW 60.800 usec  
 DE 17.42 usec  
 TE 300.0 K  
 D1 1.00000000 sec  
 TD0 1  
 SFO1 400.1124708 MHz  
 NUC1 1H  
 P0 5.00 usec  
 P1 15.00 usec  
 PLW1 17.29199982 W

F2 - Processing parameters  
 SI 32768  
 SF 400.1100128 MHz  
 WDW EM  
 SSB 0  
 LB 0.30 Hz  
 GB 0  
 PC 1.00

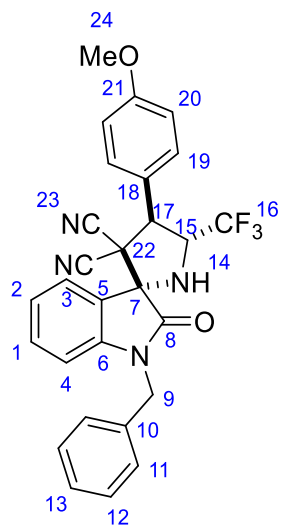

3b

Peaks picked for minor diastereomer

<sup>1</sup>H NMR  
400 MHz  
CDCl<sub>3</sub>

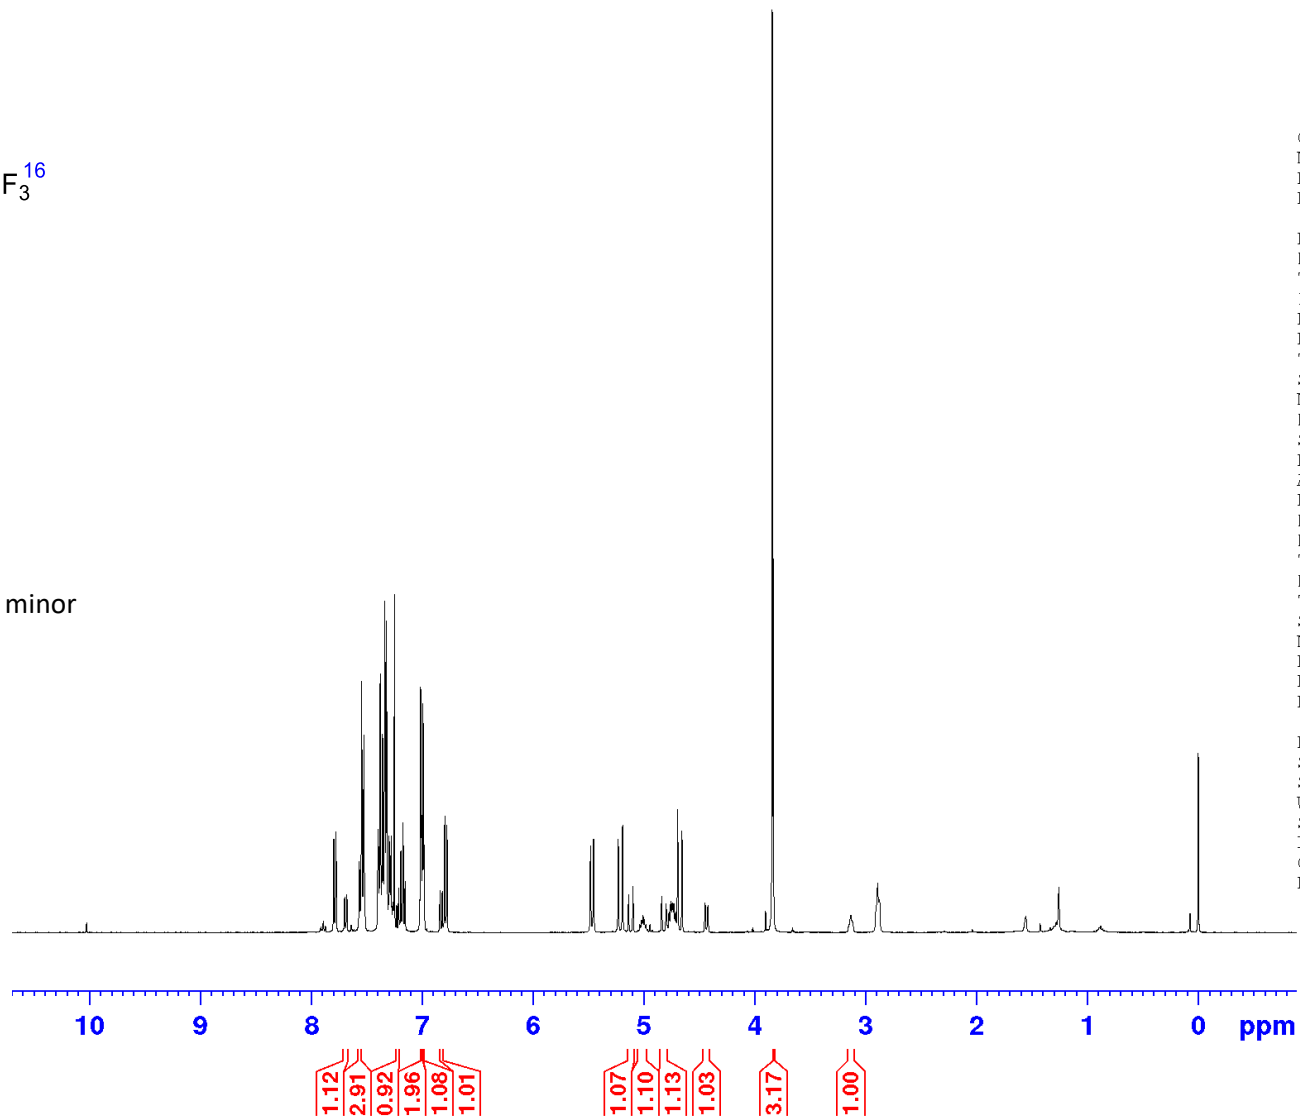

Current Data Parameters  
NAME WR 2.174 (V3)  
EXPNO 12  
PROCNO 1

F2 - Acquisition Parameters  
Date\_ 20210624  
Time 14.09 h  
INSTRUM AVIII\_400  
PROBHD Z108618\_0146 (  
PULPROG zg30  
TD 65536  
SOLVENT CDCl3  
NS 16  
DS 2  
SWH 8223.685 Hz  
FIDRES 0.250967 Hz  
AQ 3.9845889 sec  
RG 144  
DW 60.800 usec  
DE 17.42 usec  
TE 300.0 K  
D1 1.00000000 sec  
TDO 1  
SFO1 400.1124708 MHz  
NUC1 1H  
P0 5.00 usec  
P1 15.00 usec  
PLW1 17.29199982 W

F2 - Processing parameters  
SI 32768  
SF 400.1100128 MHz  
WDW EM  
SSB 0  
LB 0.30 Hz  
GB 0  
PC 1.00

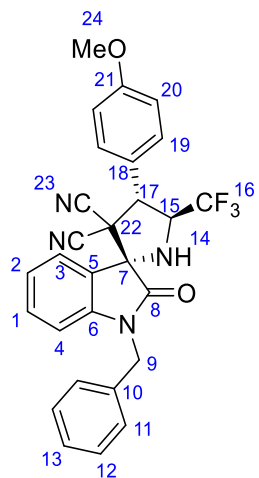

3b

Major diastereomer

<sup>13</sup>C NMR

101 MHz

CDCl<sub>3</sub>

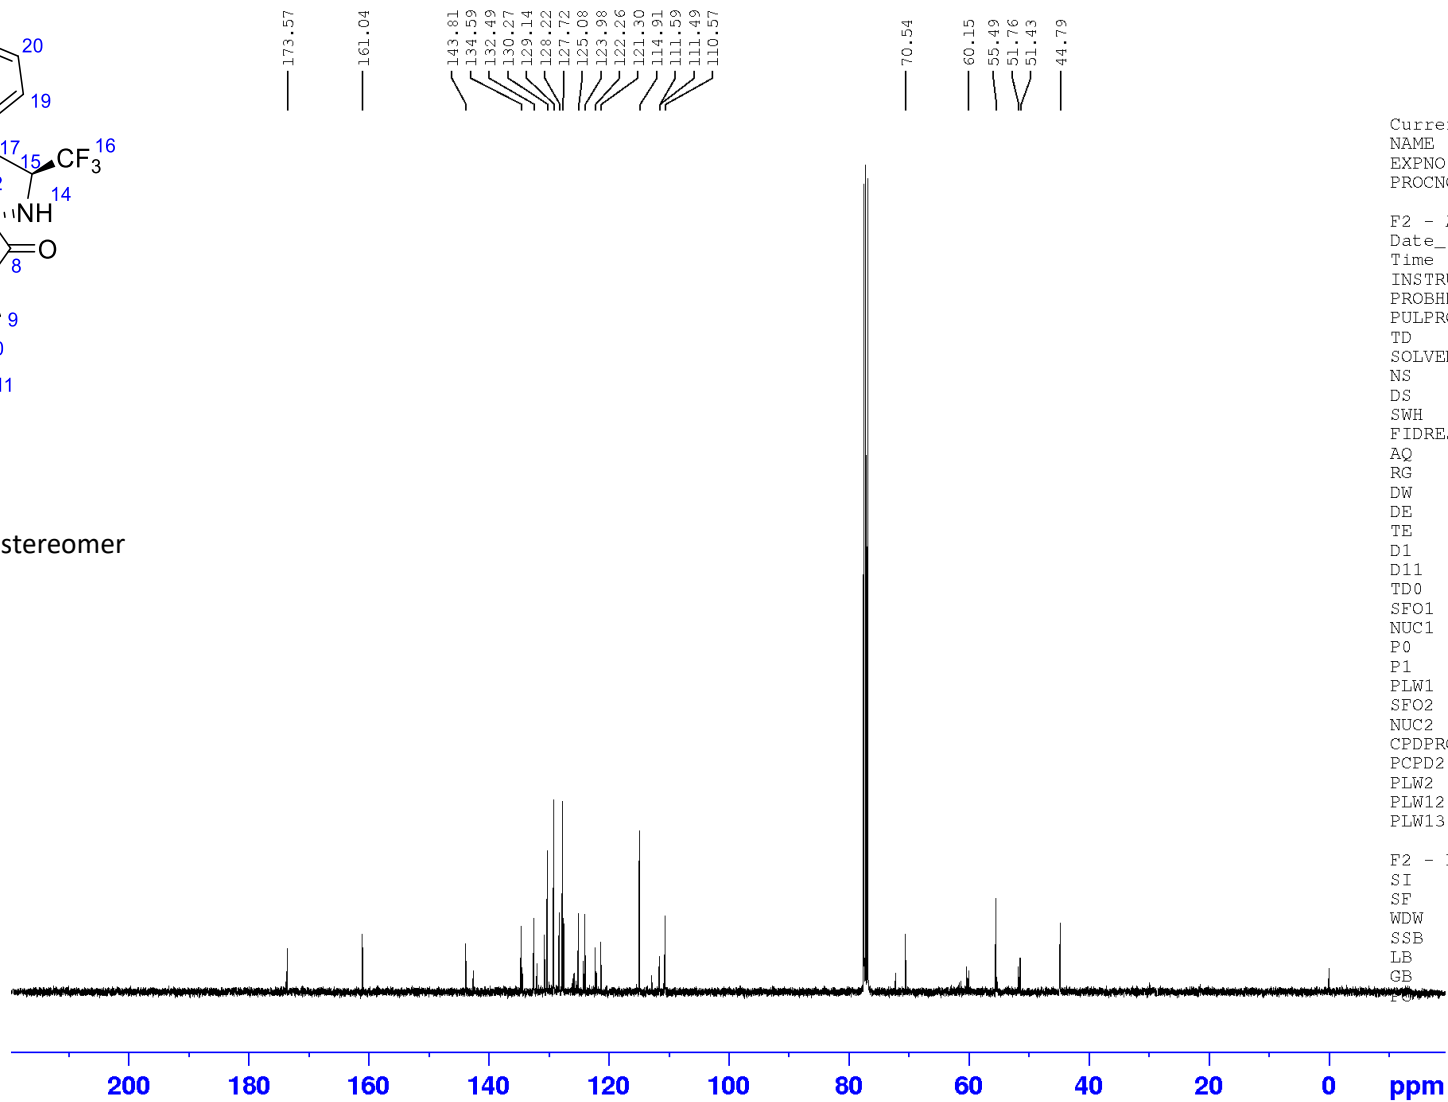

Current Data Parameters  
 NAME WR 2.174  
 EXPNO 11  
 PROCNO 1

F2 - Acquisition Parameters  
 Date\_ 20210611  
 Time 2.21 h  
 INSTRUM AVIII\_400  
 PROBHD Z108618\_0146 (  
 PULPROG zgpg30  
 TD 96150  
 SOLVENT CDCl3  
 NS 1024  
 DS 4  
 SWH 24038.461 Hz  
 FIDRES 0.500020 Hz  
 AQ 1.9999200 sec  
 RG 2050  
 DW 20.800 usec  
 DE 6.50 usec  
 TE 300.0 K  
 D1 1.00000000 sec  
 D11 0.03000000 sec  
 TD0 1  
 SFO1 100.6178003 MHz  
 NUC1 13C  
 P0 3.00 usec  
 P1 9.00 usec  
 PLW1 96.6800031 W  
 SFO2 400.1116004 MHz  
 NUC2 1H  
 CPDPRG[2] waltz64  
 PCPD2 90.00 usec  
 PLW2 17.29199982 W  
 PLW12 0.48032999 W  
 PLW13 0.24160001 W

F2 - Processing parameters  
 SI 131072  
 SF 100.6077260 MHz  
 WDW EM  
 SSB 0  
 LB 1.00 Hz  
 GB 0  
 PC 1.40





3b

Both diastereomers

<sup>19</sup>F NMR

376 MHz

CDCl<sub>3</sub>

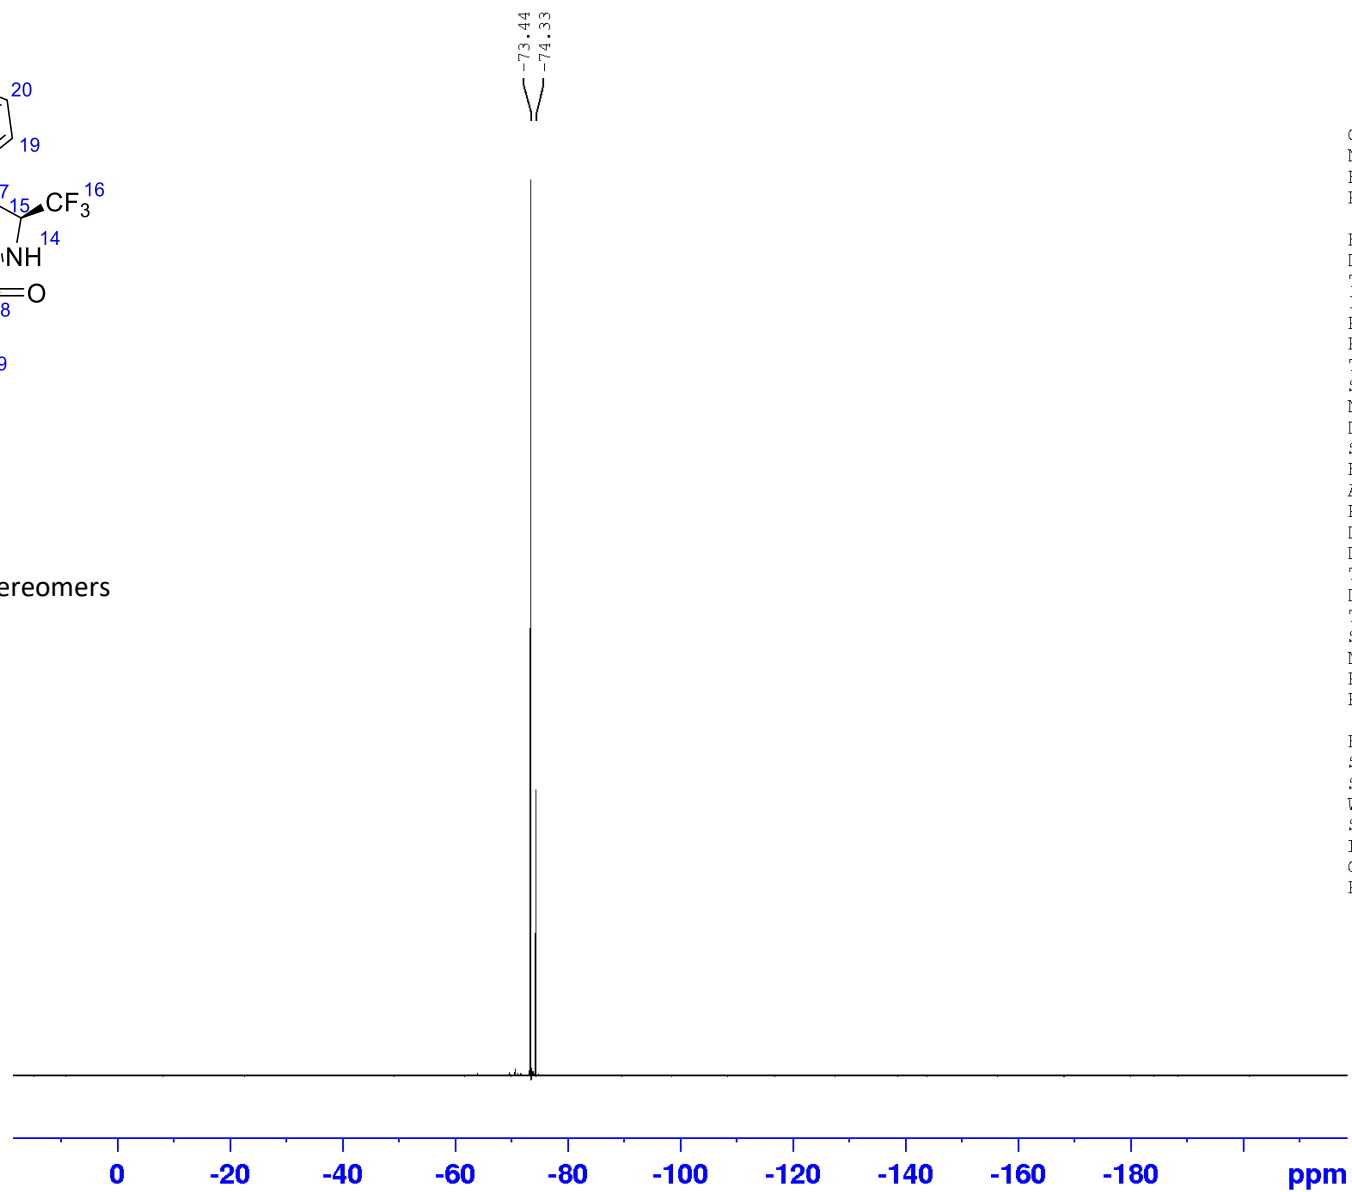

Current Data Parameters  
 NAME WR 2.174  
 EXPNO 18  
 PROCNO 1

F2 - Acquisition Parameters  
 Date\_ 20210611  
 Time 3.37 h  
 INSTRUM AVIII\_400  
 PROBHD Z108618\_0146 {  
 PULPROG zg  
 TD 261992  
 SOLVENT CDCl3  
 NS 16  
 DS 4  
 SWH 89285.711 Hz  
 FIDRES 0.681591 Hz  
 AQ 1.4671552 sec  
 RG 645  
 DW 5.600 usec  
 DE 7.11 usec  
 TE 300.0 K  
 D1 1.00000000 sec  
 TD0 1  
 SFO1 376.4418995 MHz  
 NUC1 19F  
 P1 11.80 usec  
 PLW1 32.96500015 W

F2 - Processing parameters  
 SI 262144  
 SF 376.4795470 MHz  
 WDW EM  
 SSB 0  
 LB 0.30 Hz  
 GB 0  
 PC 1.00

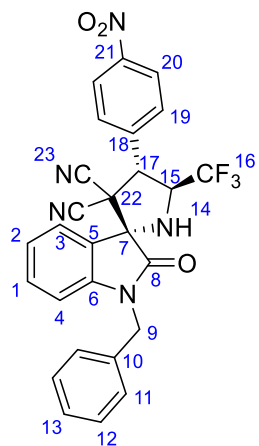

3c

Major diastereomer

<sup>1</sup>H NMR

400 MHz

CDCl<sub>3</sub>

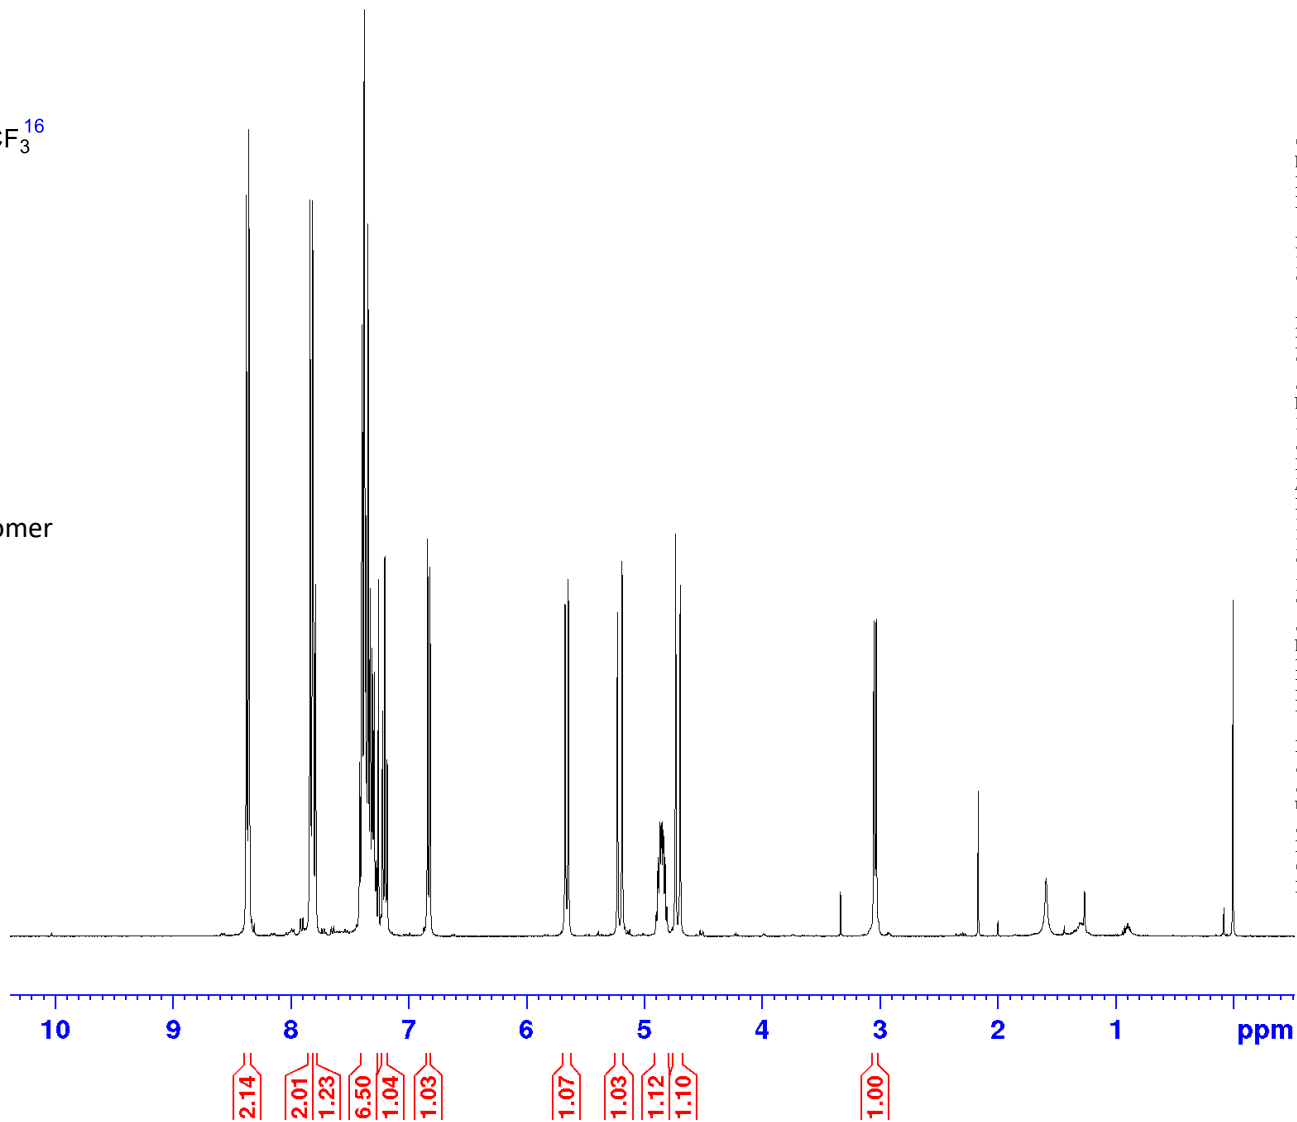

Current Data Parameters  
 NAME WR 2.167  
 EXPNO 50  
 PROCNO 1

F2 - Acquisition Parameters  
 Date\_ 20210720  
 Time 17.28 h  
 INSTRUM AVIII\_400  
 PROBHD Z108618\_0146 (  
 PULPROG zg30  
 TD 65536  
 SOLVENT CDCl3  
 NS 16  
 DS 2  
 SWH 8223.685 Hz  
 FIDRES 0.250967 Hz  
 AQ 3.9845889 sec  
 RG 144  
 DW 60.800 usec  
 DE 17.42 usec  
 TE 300.0 K  
 D1 1.00000000 sec  
 TD0 1  
 SFO1 400.1124708 MHz  
 NUC1 1H  
 P0 5.00 usec  
 P1 15.00 usec  
 PLW1 17.29199982 W

F2 - Processing parameters  
 SI 32768  
 SF 400.1100099 MHz  
 WDW EM  
 SSB 0  
 LB 0.30 Hz  
 GB 0  
 PC 1.00



3c

Major diastereomer

<sup>13</sup>C NMR

101 MHz

CDCl<sub>3</sub>

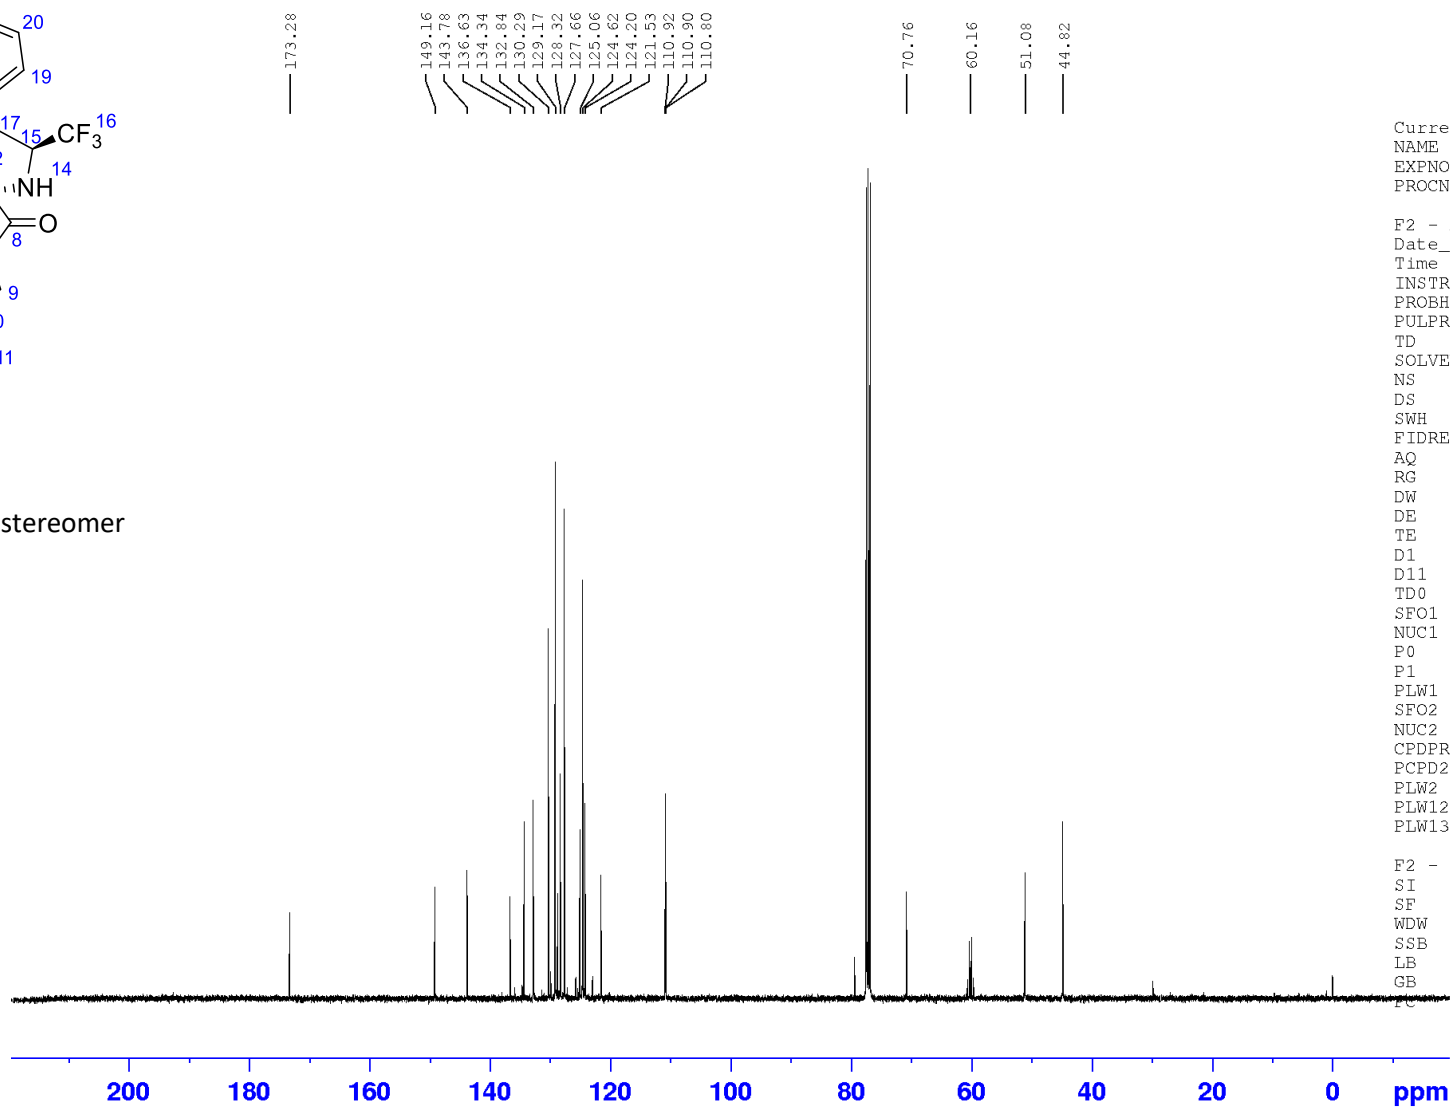

Current Data Parameters  
 NAME WR 2.167  
 EXPNO 11  
 PROCNO 1

F2 - Acquisition Parameters  
 Date\_ 20210521  
 Time 0.56 h  
 INSTRUM AVIII\_400  
 PROBHD Z108618\_0146 ( )  
 PULPROG zgpg30  
 TD 96150  
 SOLVENT CDC13  
 NS 2048  
 DS 4  
 SWH 24038.461 Hz  
 FIDRES 0.500020 Hz  
 AQ 1.9999200 sec  
 RG 2050  
 DW 20.800 usec  
 DE 6.50 usec  
 TE 300.0 K  
 D1 1.00000000 sec  
 D11 0.03000000 sec  
 TD0 1  
 SFO1 100.6178003 MHz  
 NUC1 13C  
 P0 3.00 usec  
 P1 9.00 usec  
 PLW1 96.68000031 W  
 SFO2 400.1116004 MHz  
 NUC2 1H  
 CPDPRG[2] waltz64  
 PCPD2 90.00 usec  
 PLW2 17.29199982 W  
 PLW12 0.48032999 W  
 PLW13 0.24160001 W

F2 - Processing parameters  
 SI 131072  
 SF 100.6077288 MHz  
 WDW EM  
 SSB 0  
 LB 1.00 Hz  
 GB 0  
 PC 1.40



3c

Major diastereomer

<sup>19</sup>F NMR

376 MHz

CDCl<sub>3</sub>

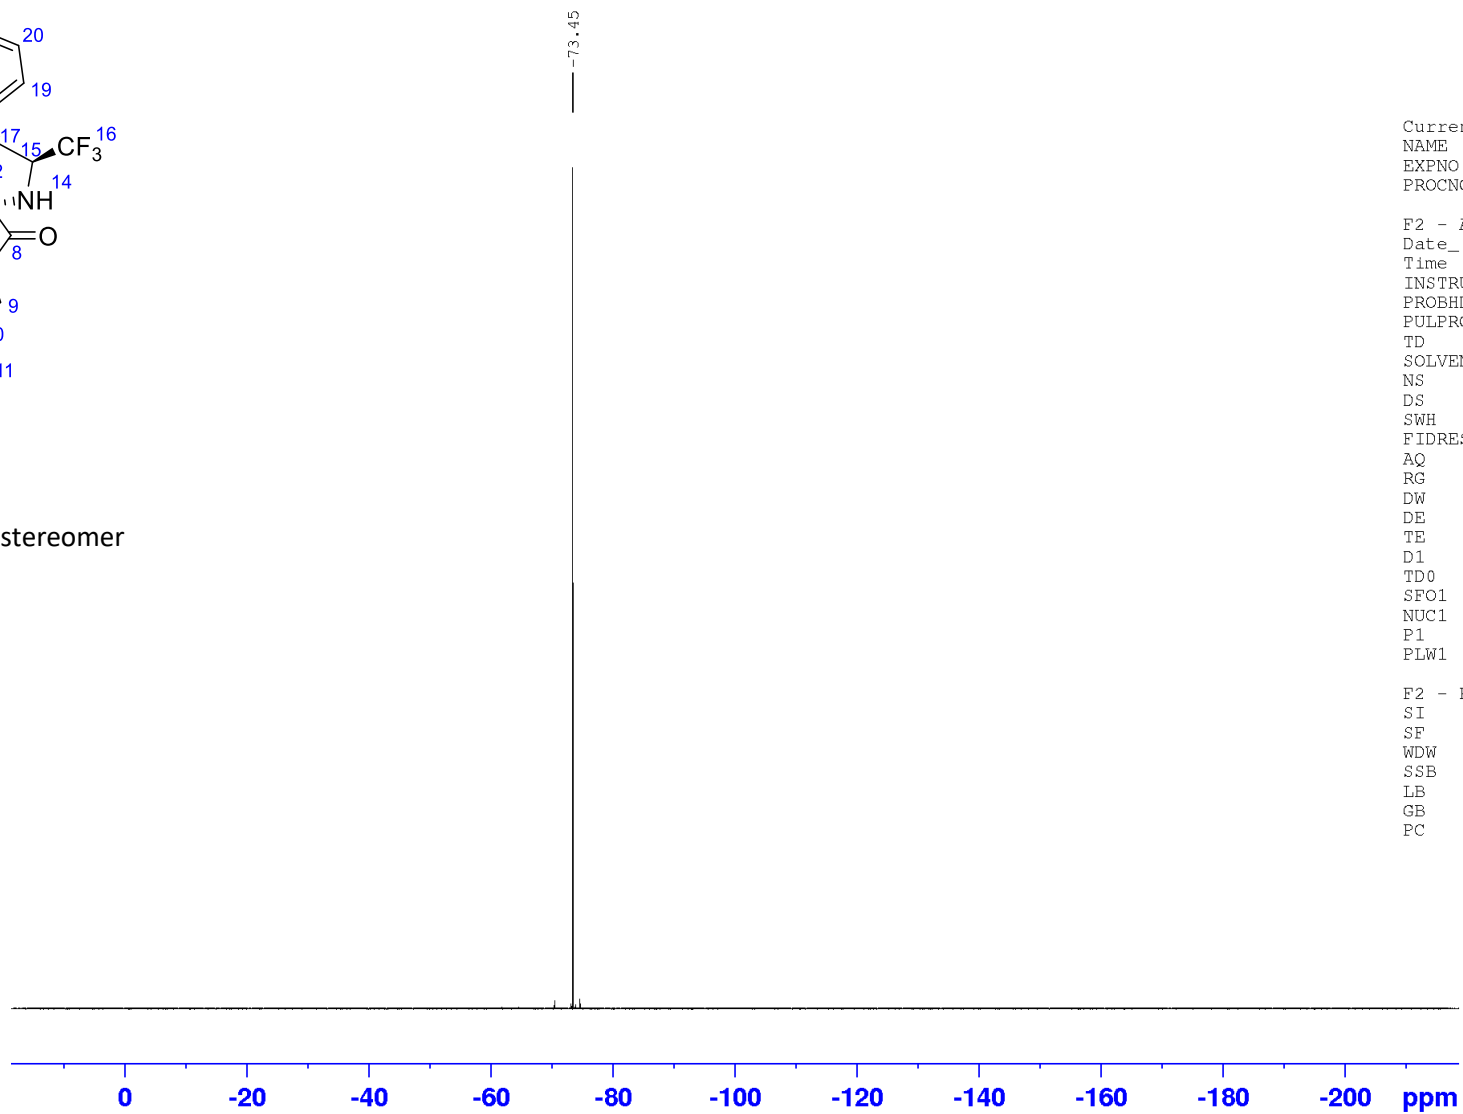

Current Data Parameters  
 NAME WR 2.167  
 EXPNO 21  
 PROCNO 1

F2 - Acquisition Parameters  
 Date\_ 20210706  
 Time 15.15 h  
 INSTRUM AVIII\_400  
 PROBHD Z108618\_0146 (  
 PULPROG zg  
 TD 261992  
 SOLVENT CDCl3  
 NS 16  
 DS 4  
 SWH 89285.711 Hz  
 FIDRES 0.681591 Hz  
 AQ 1.4671552 sec  
 RG 645  
 DW 5.600 usec  
 DE 7.11 usec  
 TE 300.0 K  
 D1 1.00000000 sec  
 TD0 1  
 SFO1 376.4418995 MHz  
 NUC1 19F  
 P1 11.80 usec  
 PLW1 32.96500015 W

F2 - Processing parameters  
 SI 262144  
 SF 376.4795470 MHz  
 WDW EM  
 SSB 0  
 LB 0.30 Hz  
 GB 0  
 PC 1.00

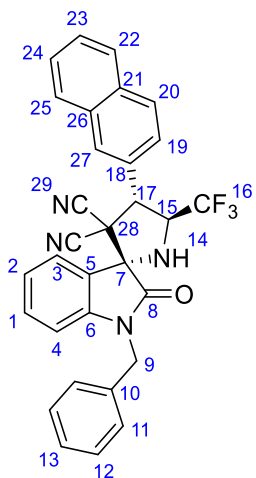

3d

Major diastereomer

<sup>1</sup>H NMR

400 MHz

CDCl<sub>3</sub>

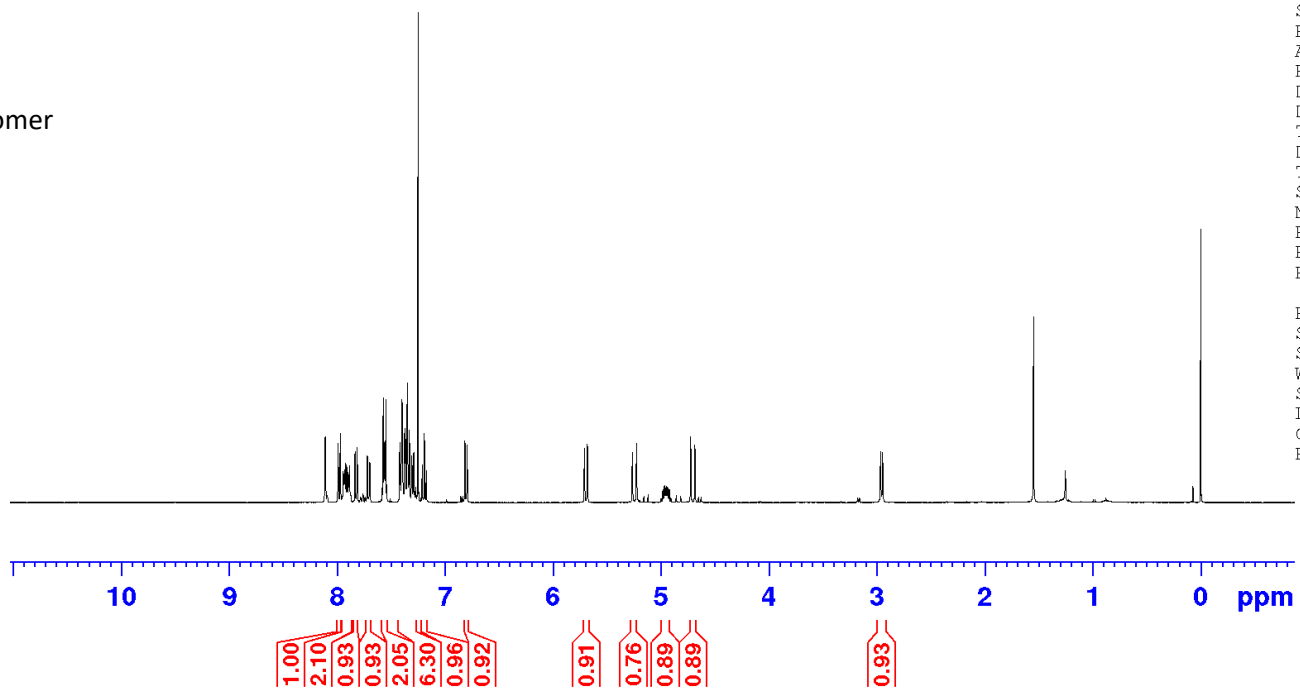

Current Data Parameters  
 NAME WR 2.164  
 EXPNO 50  
 PROCNO 1

F2 - Acquisition Parameters  
 Date\_ 20210805  
 Time 16.09 h  
 INSTRUM AVIII\_400  
 PROBHD Z108618\_0146 ( )  
 PULPROG zg30  
 TD 65536  
 SOLVENT CDCl3  
 NS 16  
 DS 2  
 SWH 8223.685 Hz  
 FIDRES 0.250967 Hz  
 AQ 3.9845889 sec  
 RG 256  
 DW 60.800 usec  
 DE 17.42 usec  
 TE 300.0 K  
 D1 1.00000000 sec  
 TD0 1  
 SFO1 400.1124708 MHz  
 NUC1 1H  
 P0 5.00 usec  
 P1 15.00 usec  
 PLW1 17.29199982 W

F2 - Processing parameters  
 SI 32768  
 SF 400.1100116 MHz  
 WDW EM  
 SSB 0  
 LB 0.30 Hz  
 GB 0  
 PC 1.00



3d

Major diastereomer

<sup>13</sup>C NMR

101 MHz

CDCl<sub>3</sub>

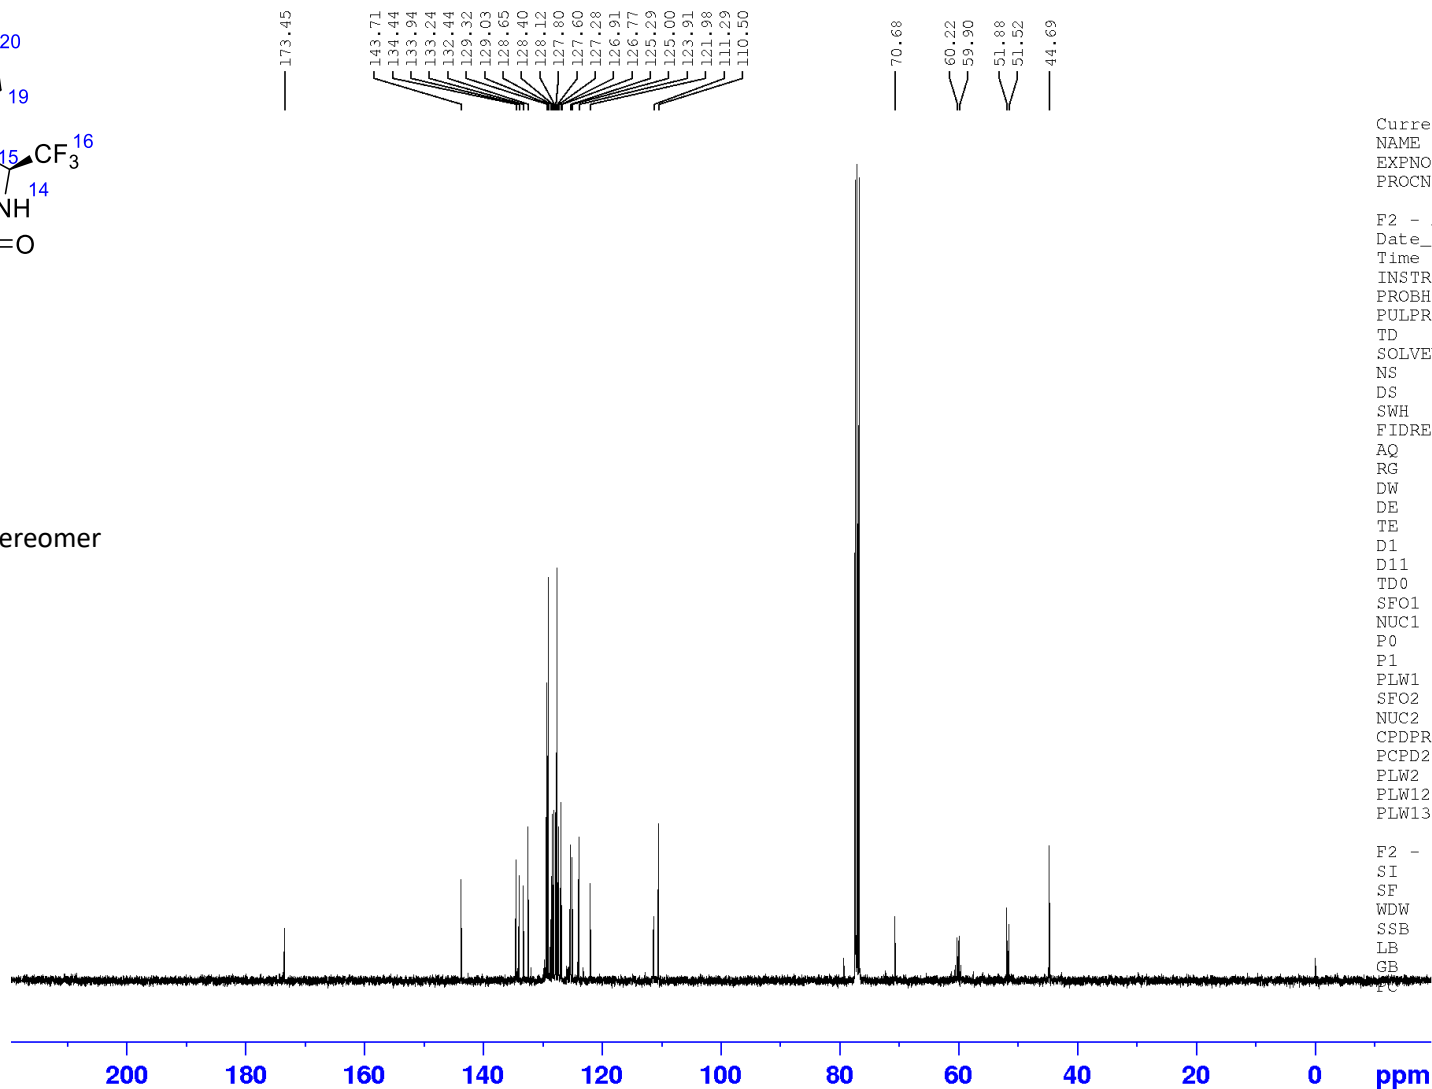

Current Data Parameters  
NAME WR 2.164  
EXPNO 11  
PROCNO 1

F2 - Acquisition Parameters  
Date\_ 20210515  
Time 2.04 h  
INSTRUM AVIII\_400  
PROBHD Z108618\_0146 ( )  
PULPROG zgpg30  
TD 96150  
SOLVENT CDC13  
NS 1024  
DS 4  
SWH 24038.461 Hz  
FIDRES 0.500020 Hz  
AQ 1.9999200 sec  
RG 2050  
DW 20.800 usec  
DE 6.50 usec  
TE 300.0 K  
D1 1.00000000 sec  
D11 0.03000000 sec  
TD0 1  
SFO1 100.6178003 MHz  
NUC1 13C  
P0 3.00 usec  
P1 9.00 usec  
PLW1 96.68000031 W  
SFO2 400.1116004 MHz  
NUC2 1H  
CPDPRG2 waltz64  
PCPD2 90.00 usec  
PLW2 17.29199982 W  
PLW12 0.48032999 W  
PLW13 0.24160001 W

F2 - Processing parameters  
SI 131072  
SF 100.6077400 MHz  
WDW EM  
SSB 0  
LB 1.00 Hz  
GB 0  
PC 1.40



3d

Major diastereomer

<sup>19</sup>F NMR

376 MHz

CDCl<sub>3</sub>

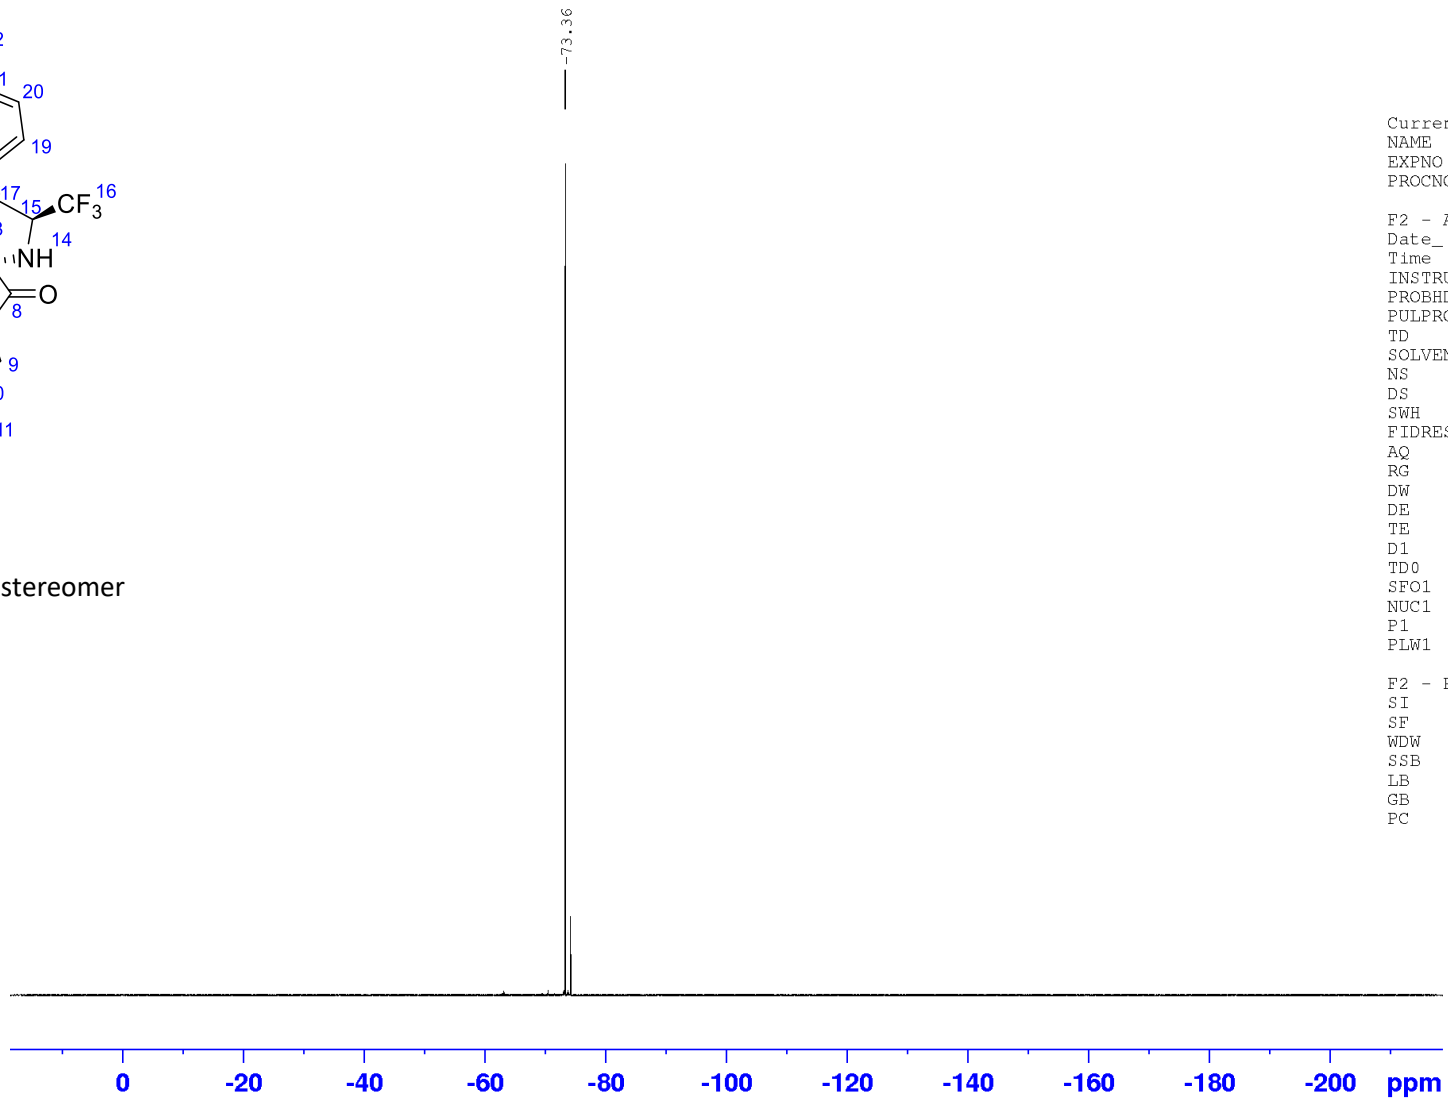

Current Data Parameters  
 NAME WR 2.164  
 EXPNO 18  
 PROCNO 1

F2 - Acquisition Parameters  
 Date\_ 20210514  
 Time 18.49 h  
 INSTRUM AVIII\_400  
 PROBHD Z108618\_0146 (  
 PULPROG zg  
 TD 261992  
 SOLVENT CDCl3  
 NS 16  
 DS 4  
 SWH 89285.711 Hz  
 FIDRES 0.681591 Hz  
 AQ 1.4671552 sec  
 RG 645  
 DW 5.600 usec  
 DE 7.11 usec  
 TE 300.0 K  
 D1 1.00000000 sec  
 TD0 1  
 SFO1 376.4418995 MHz  
 NUC1 19F  
 P1 11.80 usec  
 PLW1 32.96500015 W

F2 - Processing parameters  
 SI 262144  
 SF 376.4795470 MHz  
 WDW EM  
 SSB 0  
 LB 0.30 Hz  
 GB 0  
 PC 1.00

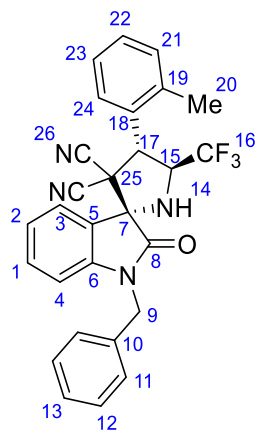

3e

Major diastereomer

<sup>1</sup>H NMR

600 MHz

CDCl<sub>3</sub>

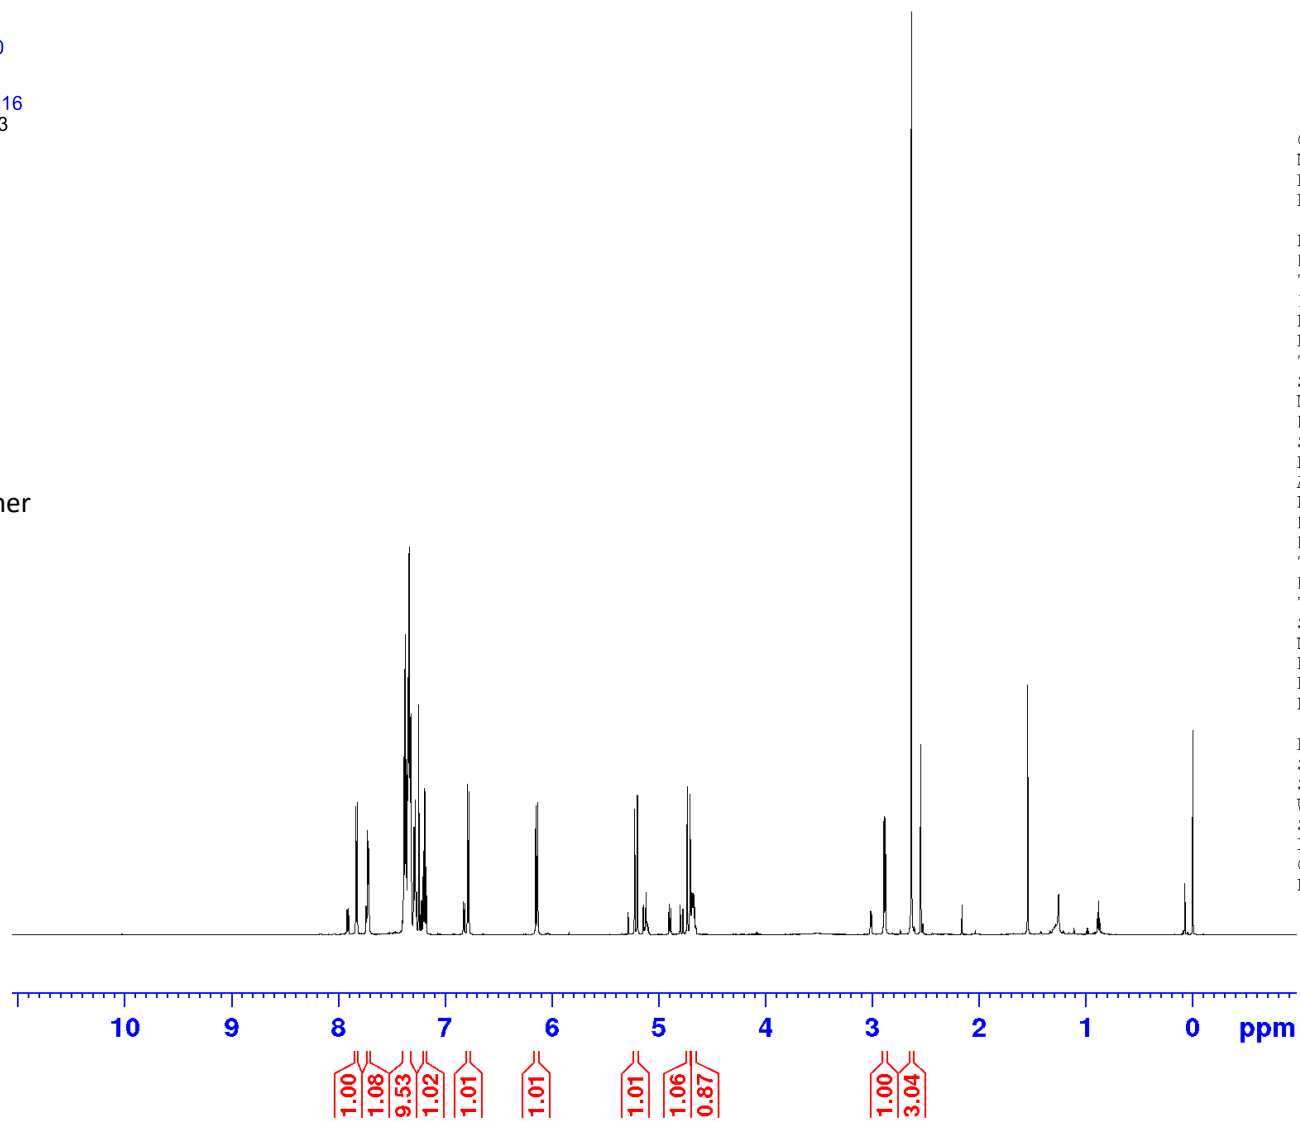

Current Data Parameters  
 NAME WR 2.160 (600)  
 EXPNO 10  
 PROCNO 1

F2 - Acquisition Parameters  
 Date\_ 20210720  
 Time 17.56 h  
 INSTRUM spect  
 PROBHD Z114607\_0188 (  
 PULPROG zg30  
 TD 65536  
 SOLVENT CDCl3  
 NS 16  
 DS 2  
 SWH 12019.230 Hz  
 FIDRES 0.366798 Hz  
 AQ 2.7262976 sec  
 RG 83.95  
 DW 41.600 usec  
 DE 12.10 usec  
 TE 302.0 K  
 D1 1.00000000 sec  
 TDO 1  
 SFO1 600.1337058 MHz  
 NUC1 1H  
 P0 3.33 usec  
 P1 10.00 usec  
 PLW1 26.60000038 W

F2 - Processing parameters  
 SI 65536  
 SF 600.1300193 MHz  
 WDW EM  
 SSB 0  
 LB 0.30 Hz  
 GB 0  
 PC 1.00



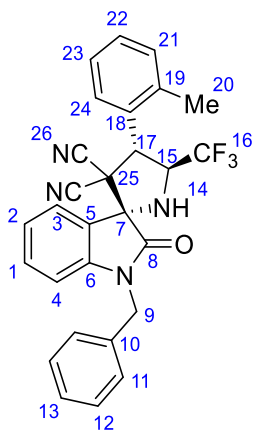

3e

Major diastereomer

<sup>13</sup>C NMR

151 MHz

CDCl<sub>3</sub>

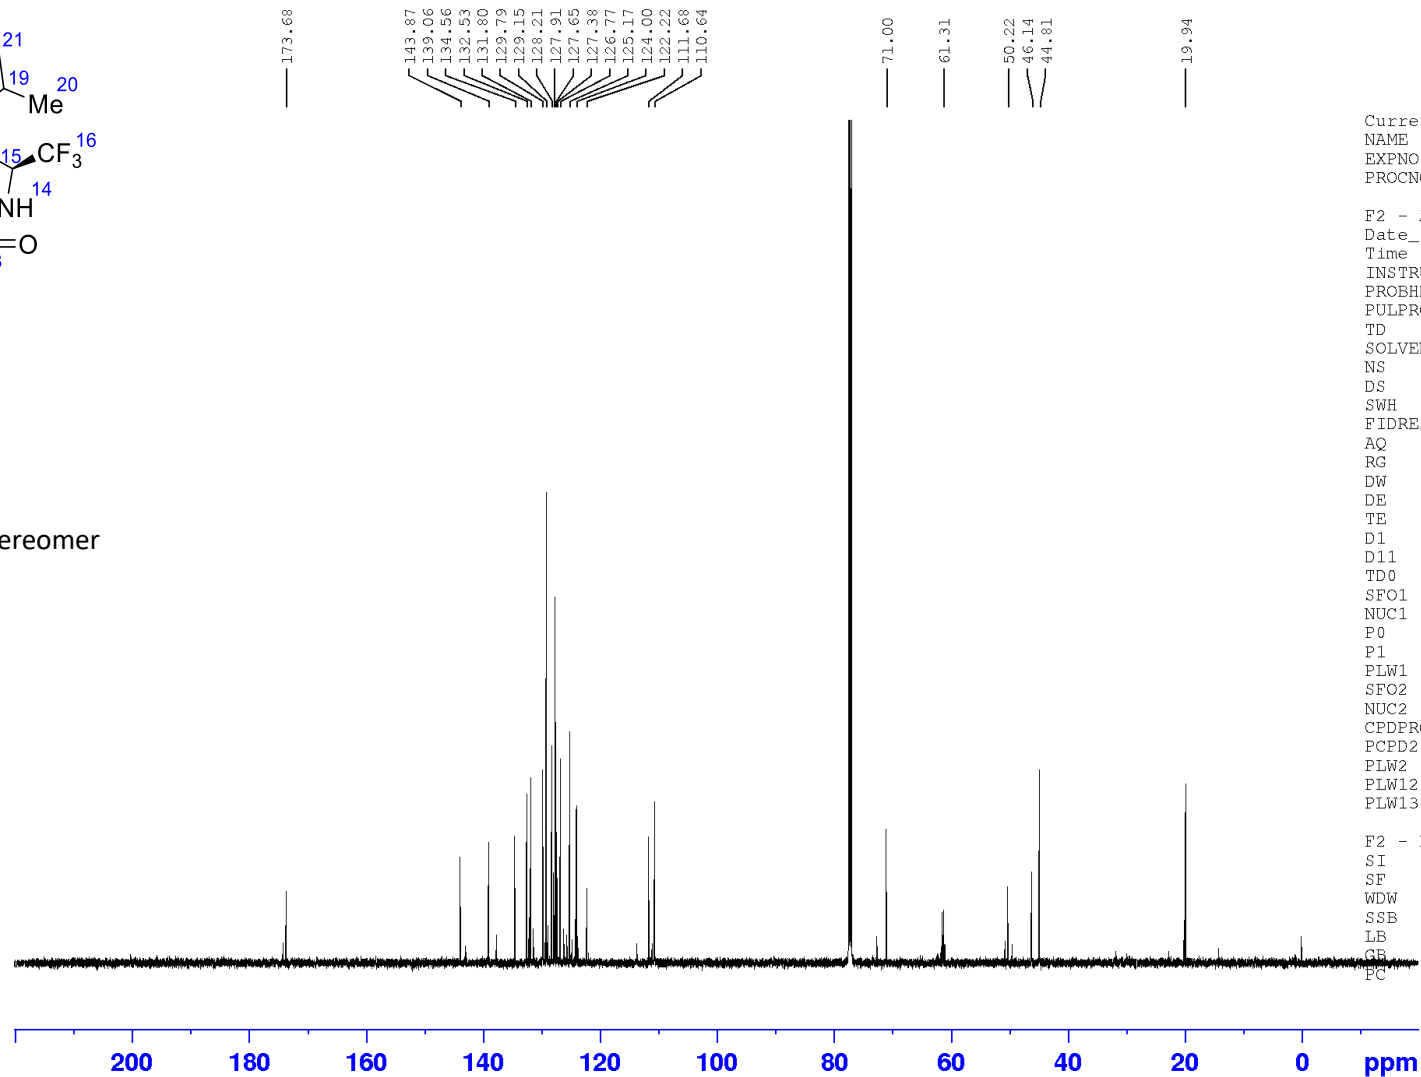

Current Data Parameters  
NAME WR 2.160 (600)  
EXPNO 11  
PROCNO 1

F2 - Acquisition Parameters  
Date\_ 20210720  
Time 18.47 h  
INSTRUM spect  
PROBHD Z114607\_0188 (  
PULPROG zgpg30  
TD 65536  
SOLVENT CDC13  
NS 1024  
DS 4  
SWH 36231.883 Hz  
FIDRES 1.105709 Hz  
AQ 0.9043968 sec  
RG 186.92  
DW 13.800 usec  
DE 6.50 usec  
TE 303.6 K  
D1 2.0000000 sec  
D11 0.0300000 sec  
TD0 1  
SFO1 150.9178988 MHz  
NUC1 13C  
P0 3.93 usec  
P1 11.80 usec  
PLW1 85.0000000 W  
SFO2 600.1324005 MHz  
NUC2 1H  
CPDPRG[2] waltz65  
PCPD2 70.00 usec  
PLW2 27.0000000 W  
PLW12 0.57327998 W  
PLW13 0.28836000 W

F2 - Processing parameters  
SI 32768  
SF 150.9027852 MHz  
WDW EM  
SSB 0  
LB 1.00 Hz  
GB 0  
PC 1.40



3e

Major diastereomer

<sup>19</sup>F NMR

564 MHz

CDCl<sub>3</sub>

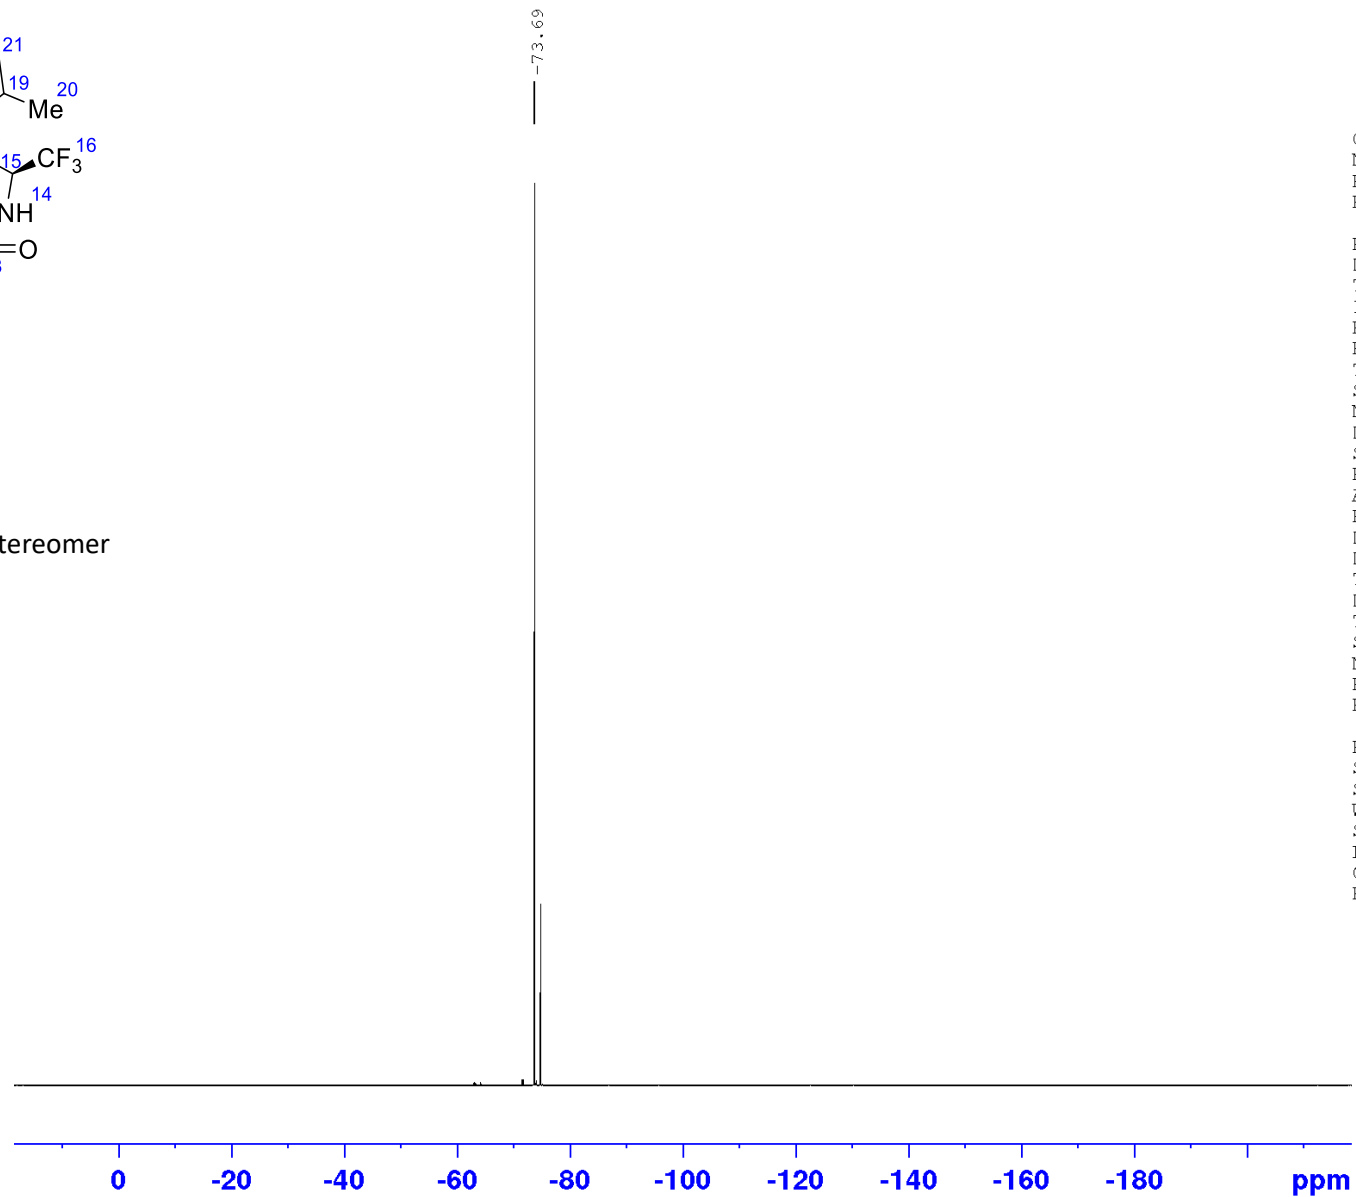

Current Data Parameters  
 NAME WR 2.160 (600)  
 EXPNO 18  
 PROCNO 1

F2 - Acquisition Parameters  
 Date\_ 20210720  
 Time 20.57 h  
 INSTRUM spect  
 PROBHD Z114607\_0188 (  
 PULPROG zgflqn  
 TD 261896  
 SOLVENT CDCl3  
 NS 16  
 DS 4  
 SWH 133928.578 Hz  
 FIDRES 1.022761 Hz  
 AQ 0.9777451 sec  
 RG 186.92  
 DW 3.733 usec  
 DE 6.70 usec  
 TE 301.9 K  
 D1 4.00000000 sec  
 TD0 1  
 SFO1 564.6299217 MHz  
 NUC1 19F  
 P1 12.00 usec  
 PLW1 49.00000000 W

F2 - Processing parameters  
 SI 262144  
 SF 564.6863882 MHz  
 WDW EM  
 SSB 0  
 LB 0.50 Hz  
 GB 0  
 PC 2.00

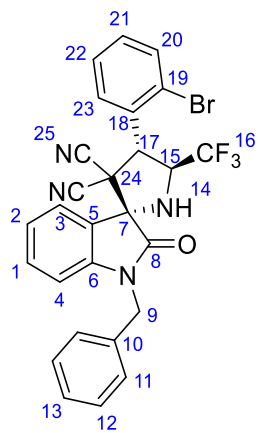

3f

Major diastereomer

<sup>1</sup>H NMR

600 MHz

CDCl<sub>3</sub>

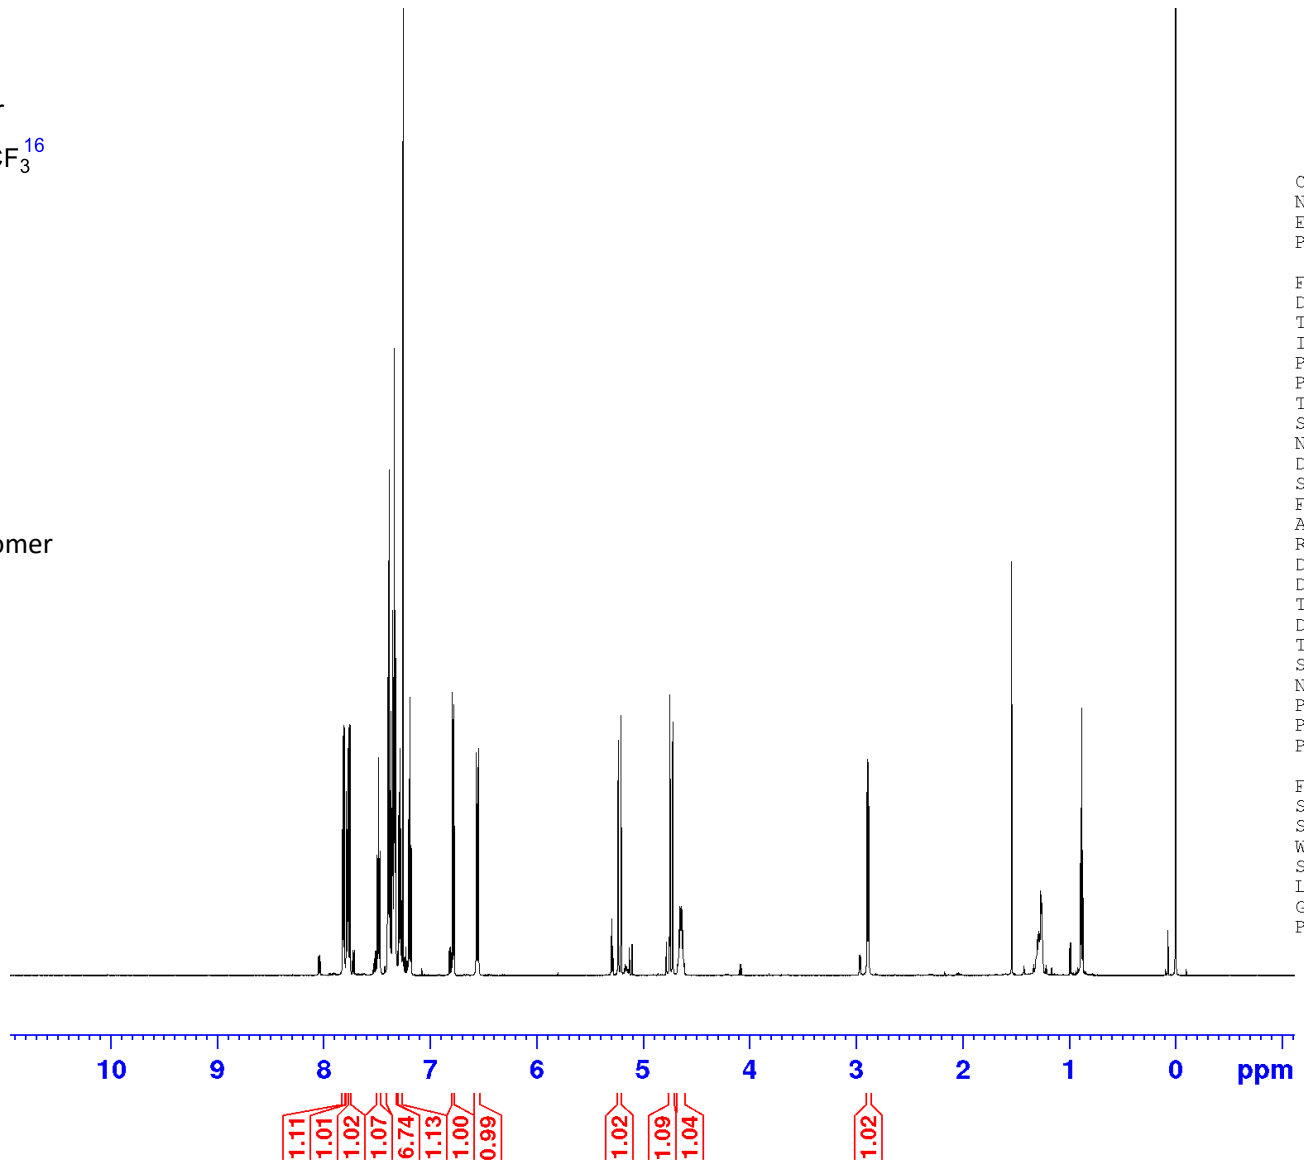

Current Data Parameters  
 NAME WR 2.158 (600)  
 EXPNO 20  
 PROCNO 1

F2 - Acquisition Parameters  
 Date\_ 20210728  
 Time 20.44 h  
 INSTRUM spect  
 PROBHD Z114607\_0188 (  
 PULPROG zg30  
 TD 65536  
 SOLVENT CDCl3  
 NS 16  
 DS 2  
 SWH 12019.230 Hz  
 FIDRES 0.366798 Hz  
 AQ 2.7262976 sec  
 RG 119.2  
 DW 41.600 usec  
 DE 12.10 usec  
 TE 312.0 K  
 D1 1.00000000 sec  
 TD0 1  
 SFO1 600.1337058 MHz  
 NUC1 1H  
 P0 3.33 usec  
 P1 10.00 usec  
 PLW1 26.60000038 W

F2 - Processing parameters  
 SI 65536  
 SF 600.1300148 MHz  
 WDW EM  
 SSB 0  
 LB 0.30 Hz  
 GB 0  
 PC 1.00



3f

Major diastereomer

<sup>13</sup>C NMR

151 MHz

CDCl<sub>3</sub>

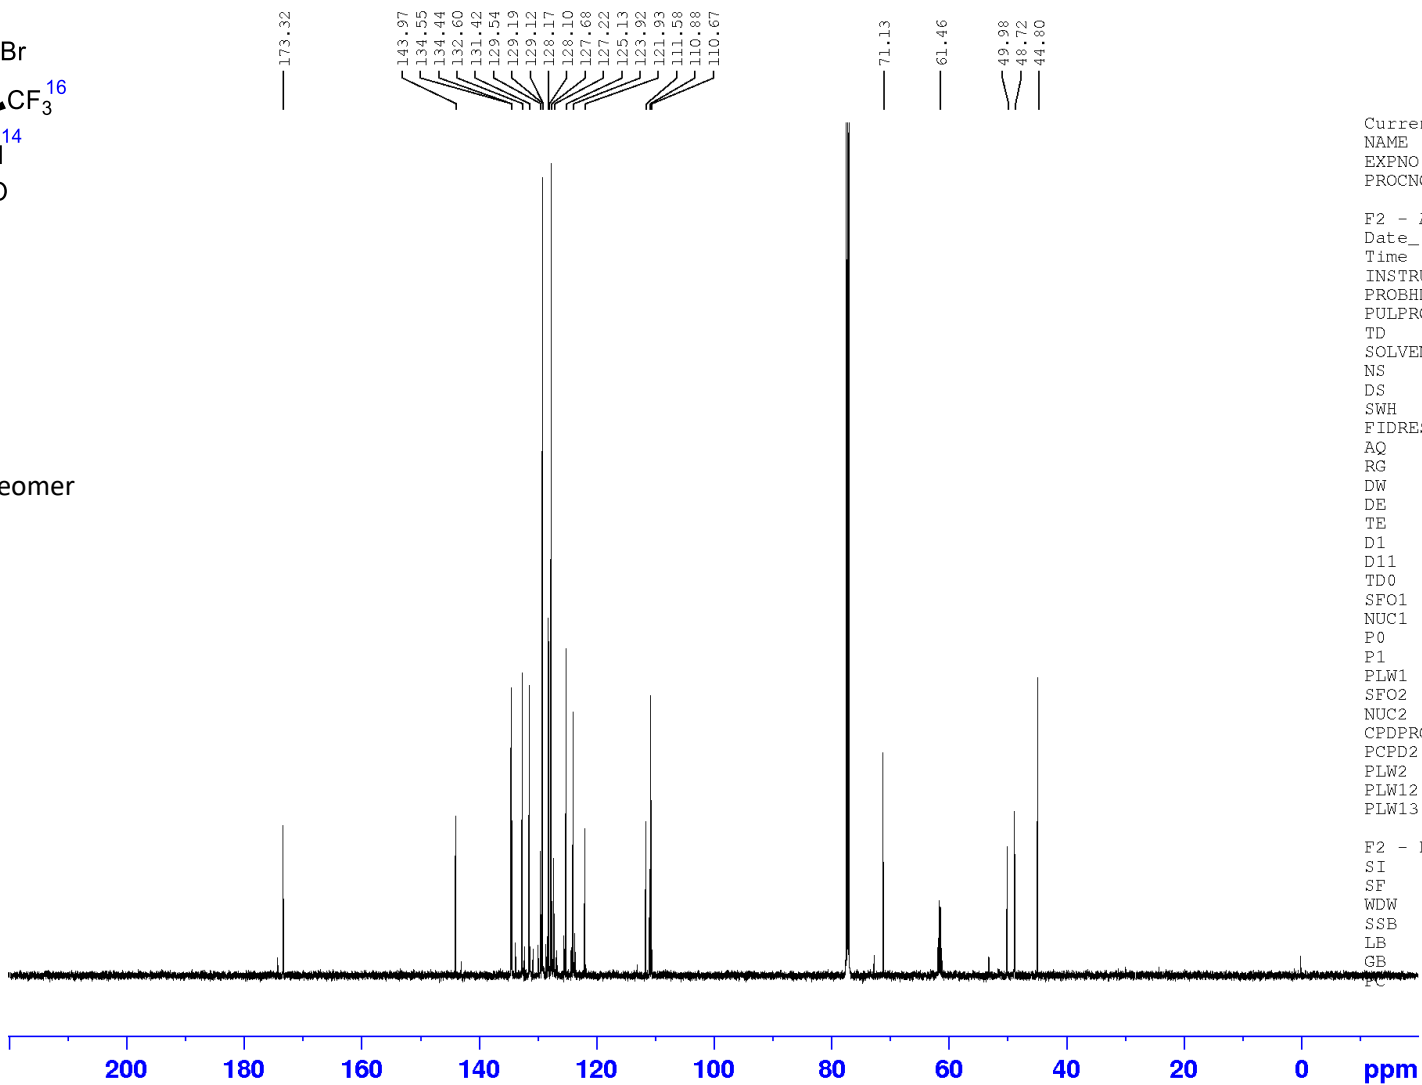

Current Data Parameters  
 NAME WR 2.158 (600)  
 EXPNO 11  
 PROCNO 1

F2 - Acquisition Parameters  
 Date\_ 20210720  
 Time 21.55 h  
 INSTRUM spect  
 PROBHD Z114607\_0188 (  
 PULPROG zgpg30  
 TD 65536  
 SOLVENT CDCl3  
 NS 1024  
 DS 4  
 SWH 36231.883 Hz  
 FIDRES 1.105709 Hz  
 AQ 0.9043968 sec  
 RG 186.92  
 DW 13.800 usec  
 DE 6.50 usec  
 TE 303.2 K  
 D1 2.0000000 sec  
 D11 0.0300000 sec  
 TD0 1  
 SFO1 150.9178988 MHz  
 NUC1 13C  
 P0 3.93 usec  
 P1 11.80 usec  
 PLW1 85.0000000 W  
 SFO2 600.1324005 MHz  
 NUC2 1H  
 CPDPRG[2] waltz65  
 PCPD2 70.00 usec  
 PLW2 27.0000000 W  
 PLW12 0.57327998 W  
 PLW13 0.28836000 W

F2 - Processing parameters  
 SI 32768  
 SF 150.9027885 MHz  
 WDW EM  
 SSB 0  
 LB 1.00 Hz  
 GB 0  
 PC 1.40



3f

Major diastereomer

<sup>19</sup>F NMR

564 MHz

CDCl<sub>3</sub>

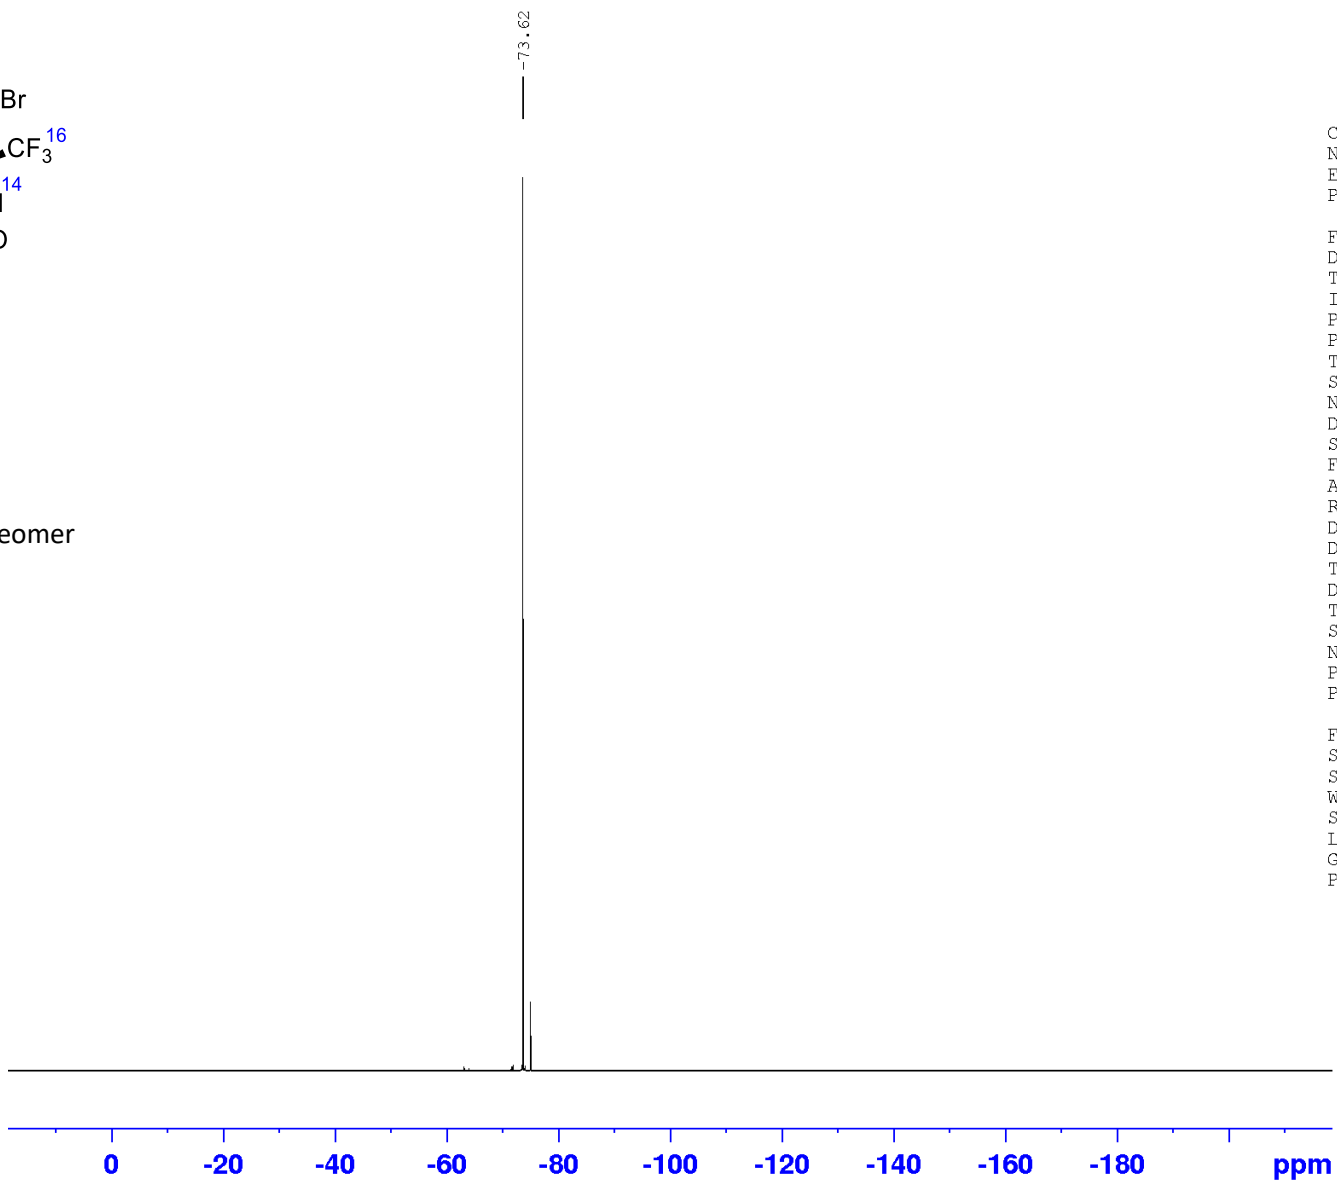

Current Data Parameters  
 NAME WR 2.158 (600)  
 EXPNO 18  
 PROCNO 1

F2 - Acquisition Parameters  
 Date\_ 20210721  
 Time 0.04 h  
 INSTRUM spect  
 PROBHD Z114607\_0188 (  
 PULPROG zgflqn  
 TD 261896  
 SOLVENT CDCl3  
 NS 16  
 DS 4  
 SWH 133928.578 Hz  
 FIDRES 1.022761 Hz  
 AQ 0.9777451 sec  
 RG 186.92  
 DW 3.733 usec  
 DE 6.70 usec  
 TE 301.2 K  
 D1 4.0000000 sec  
 TD0 1  
 SFO1 564.6299217 MHz  
 NUC1 19F  
 P1 12.00 usec  
 PLW1 49.0000000 W

F2 - Processing parameters  
 SI 262144  
 SF 564.6863882 MHz  
 WDW EM  
 SSB 0  
 LB 0.50 Hz  
 GB 0  
 PC 2.00

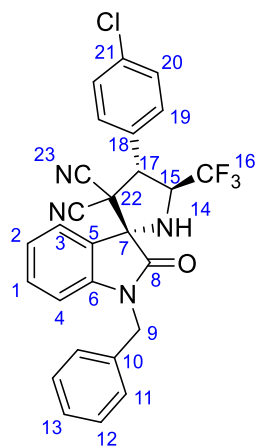

3g

Major diastereomer

<sup>1</sup>H NMR

400 MHz

CDCl<sub>3</sub>

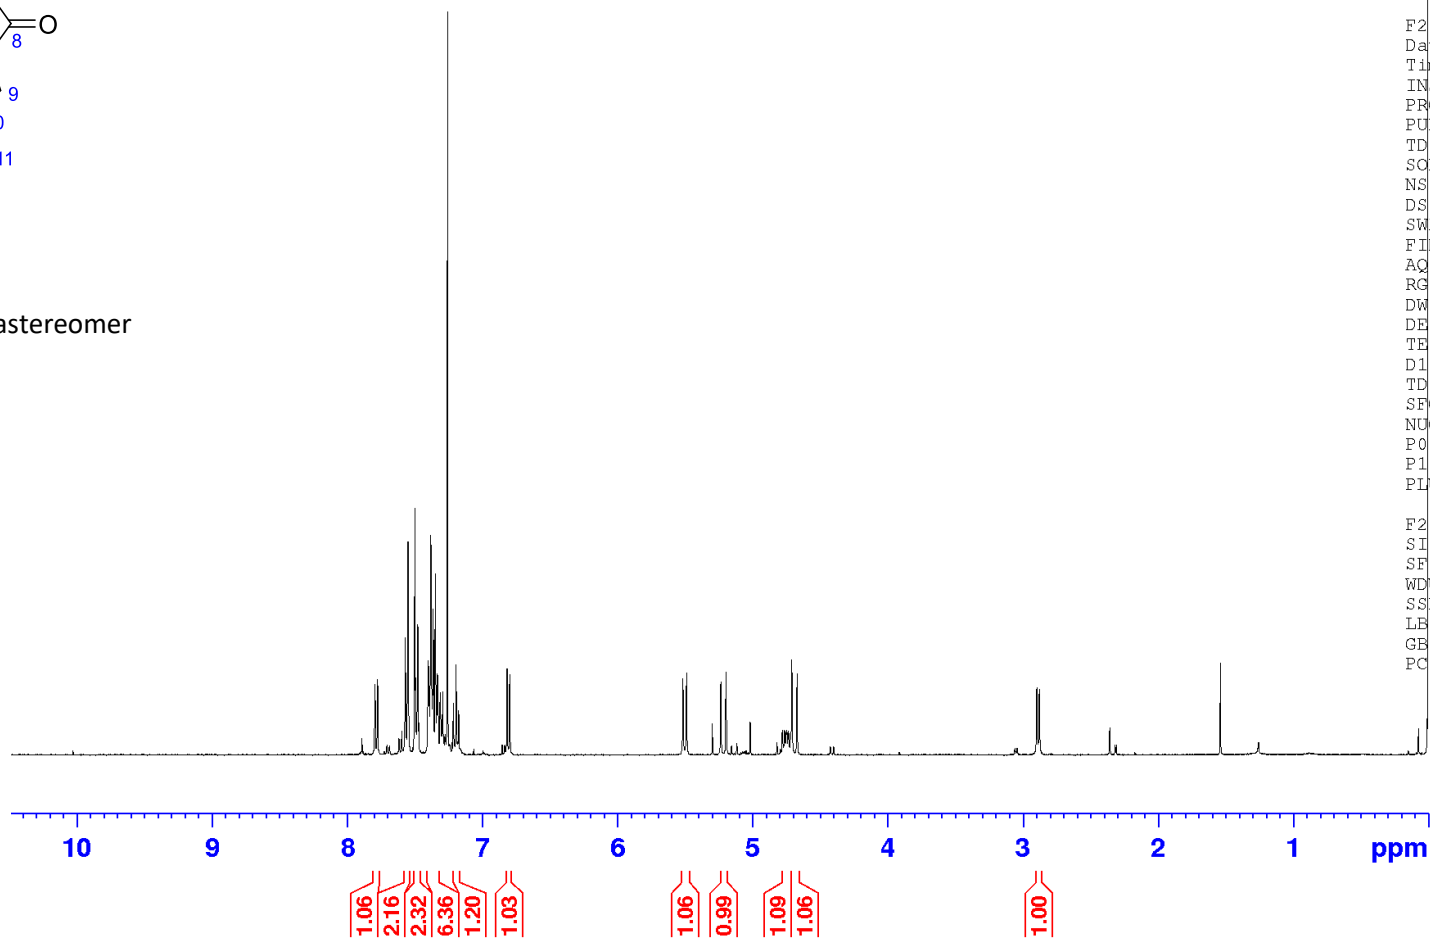

Current Data Parameters  
 NAME WR 2.145  
 EXPNO 10  
 PROCNO 1

F2 - Acquisition Parameters  
 Date\_ 20210415  
 Time 18.10 h  
 INSTRUM AVIII\_400  
 PROBHD Z108618\_0146 (  
 PULPROG zg30  
 TD 65536  
 SOLVENT CDC13  
 NS 16  
 DS 2  
 SWH 8223.685 Hz  
 FIDRES 0.250967 Hz  
 AQ 3.9845889 sec  
 RG 256  
 DW 60.800 usec  
 DE 17.42 usec  
 TE 300.0 K  
 D1 1.00000000 sec  
 TD0 1  
 SFO1 400.1124708 MHz  
 NUC1 1H  
 P0 5.00 usec  
 P1 15.00 usec  
 PLW1 17.29199982 W

F2 - Processing parameters  
 SI 32768  
 SF 400.1100104 MHz  
 WDW EM  
 SSB 0  
 LB 0.30 Hz  
 GB 0  
 PC 1.00

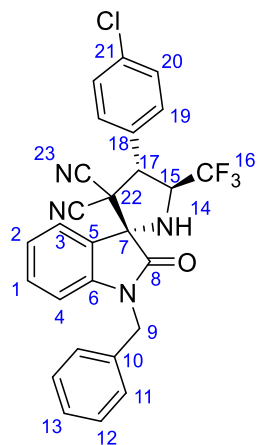

3g

Major diastereomer

<sup>13</sup>C NMR

101 MHz

CDCl<sub>3</sub>

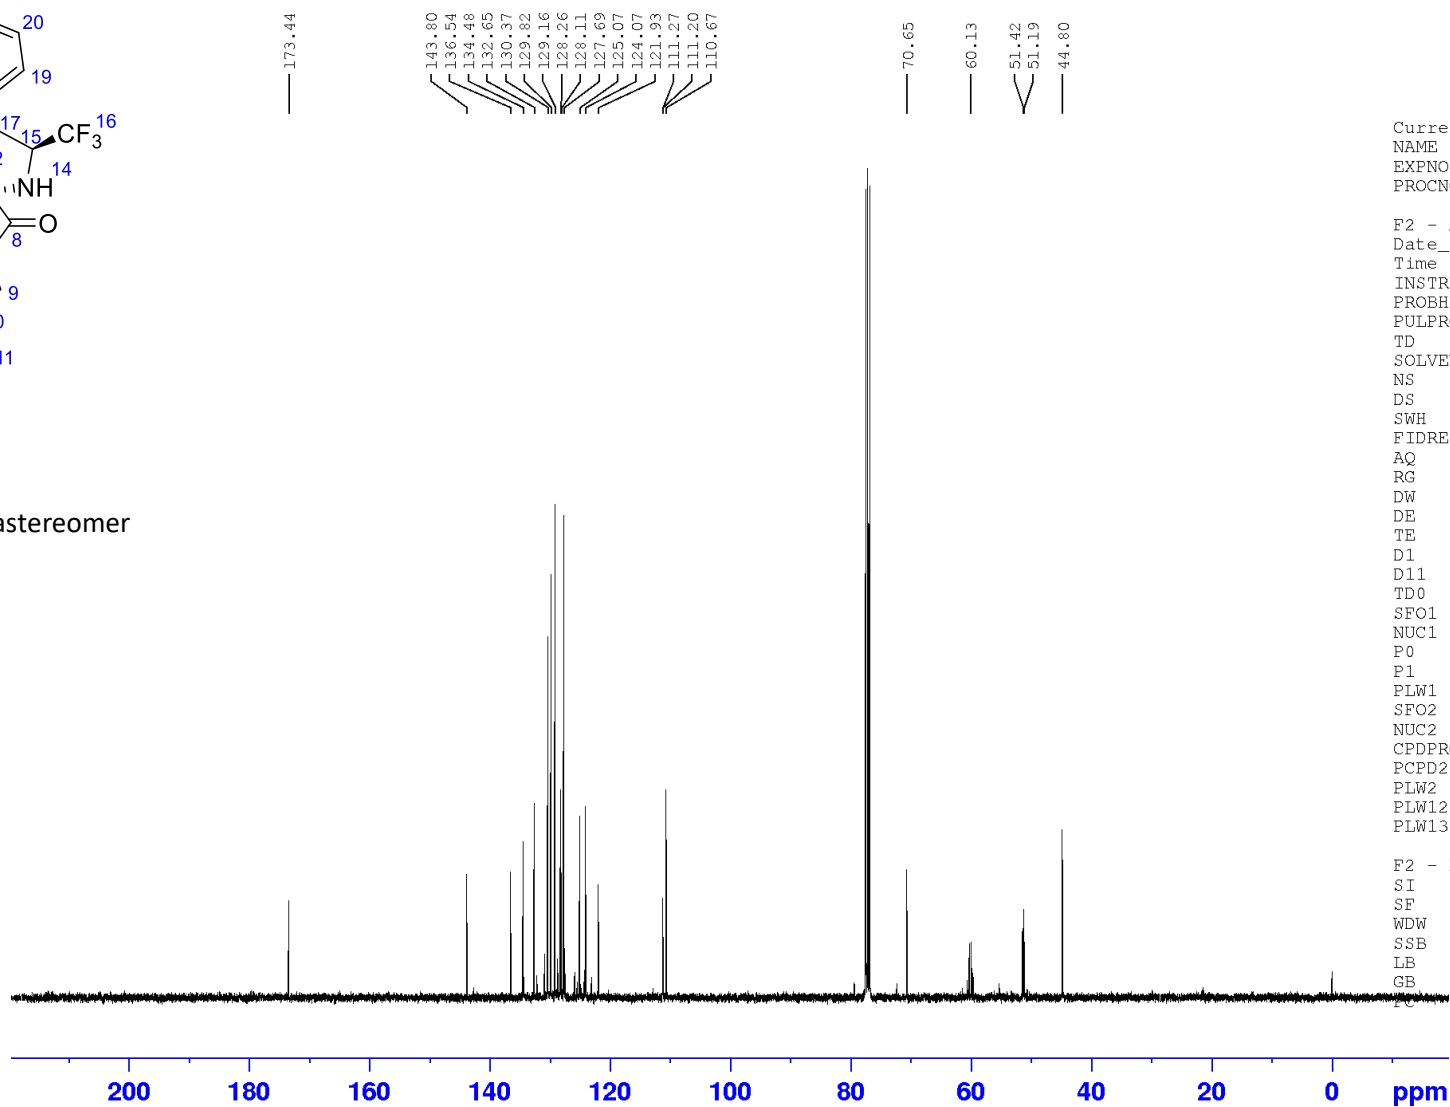

Current Data Parameters  
 NAME WR 2.145  
 EXPNO 21  
 PROCNO 1

F2 - Acquisition Parameters  
 Date\_ 20210603  
 Time 18.17 h  
 INSTRUM AVIII\_400  
 PROBHD Z108618\_0146 ( )  
 PULPROG zgpg30  
 TD 96150  
 SOLVENT CDC13  
 NS 1024  
 DS 4  
 SWH 24038.461 Hz  
 FIDRES 0.500020 Hz  
 AQ 1.9999200 sec  
 RG 2050  
 DW 20.800 usec  
 DE 6.50 usec  
 TE 300.0 K  
 D1 1.00000000 sec  
 D11 0.03000000 sec  
 TD0 1  
 SFO1 100.6178003 MHz  
 NUC1 13C  
 P0 3.00 usec  
 P1 9.00 usec  
 PLW1 96.68000031 W  
 SFO2 400.1116004 MHz  
 NUC2 1H  
 CPDPRG[2] waltz64  
 PCPD2 90.00 usec  
 PLW2 17.29199982 W  
 PLW12 0.48032999 W  
 PLW13 0.24160001 W

F2 - Processing parameters  
 SI 131072  
 SF 100.6077270 MHz  
 WDW EM  
 SSB 0  
 LB 1.00 Hz  
 GB 0  
 PC 1.40



3g

Major diastereomer

<sup>19</sup>F NMR

376 MHz

CDCl<sub>3</sub>

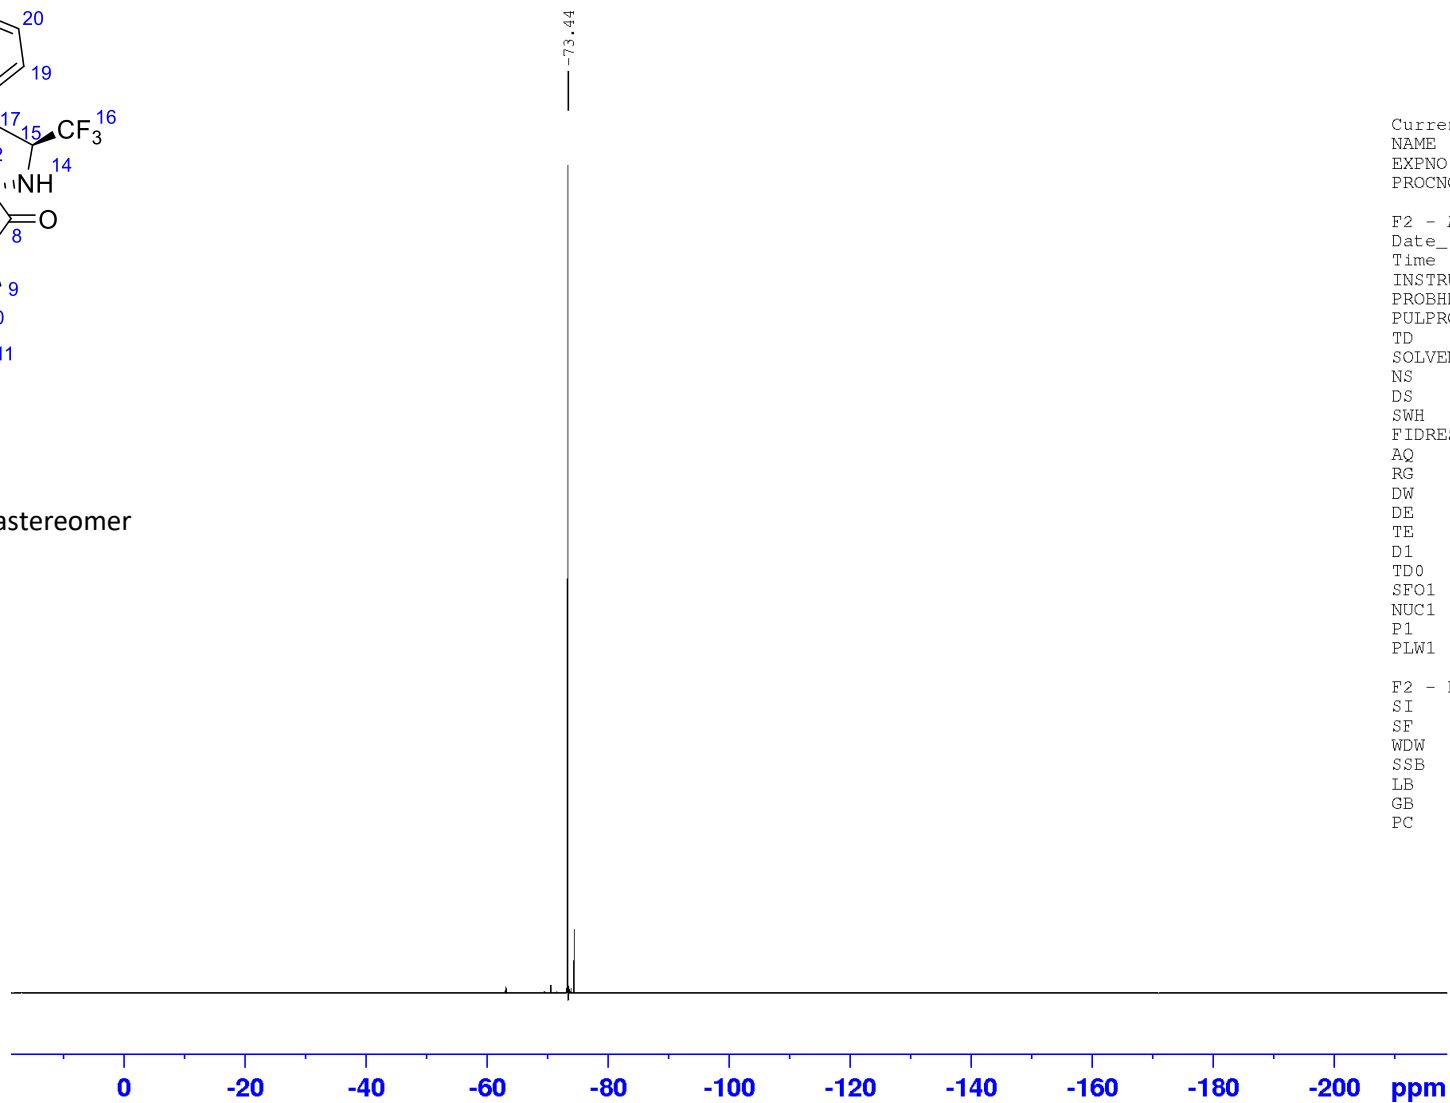

Current Data Parameters  
 NAME WR 2.145  
 EXPNO 27  
 PROCNO 1

F2 - Acquisition Parameters  
 Date\_ 20210603  
 Time 17.12 h  
 INSTRUM AVIIL\_400  
 PROBHD Z108618\_0146 (  
 PULPROG zg  
 TD 261992  
 SOLVENT CDCl3  
 NS 16  
 DS 4  
 SWH 89285.711 Hz  
 FIDRES 0.681591 Hz  
 AQ 1.4671552 sec  
 RG 724  
 DW 5.600 usec  
 DE 7.11 usec  
 TE 300.0 K  
 D1 1.00000000 sec  
 TD0 1  
 SFO1 376.4418995 MHz  
 NUC1 19F  
 P1 11.80 usec  
 PLW1 32.96500015 W

F2 - Processing parameters  
 SI 262144  
 SF 376.4795470 MHz  
 WDW EM  
 SSB 0  
 LB 0.30 Hz  
 GB 0  
 PC 1.00



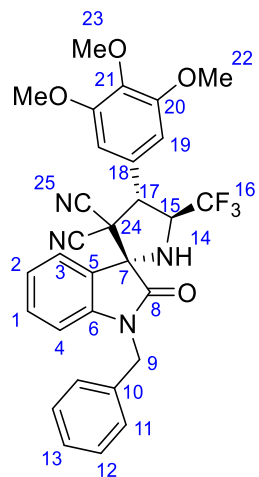

3h

Major diastereomer

<sup>1</sup>H NMR

400 MHz

CDCl<sub>3</sub>

Current Data Parameters  
 NAME WR 2.143  
 EXPNO 10  
 PROCNO 1

F2 - Acquisition Parameters  
 Date\_ 20210416  
 Time 17.50 h  
 INSTRUM AVIII\_400  
 PROBHD Z108618\_0146 (  
 PULPROG zg30  
 TD 65536  
 SOLVENT CDCl3  
 NS 16  
 DS 2  
 SWH 8223.685 Hz  
 FIDRES 0.250967 Hz  
 AQ 3.9845889 sec  
 RG 256  
 DW 60.800 usec  
 DE 17.42 usec  
 TE 300.0 K  
 D1 1.00000000 sec  
 TD0 1  
 SFO1 400.1124708 MHz  
 NUC1 1H  
 P0 5.00 usec  
 P1 15.00 usec  
 PLW1 17.29199982 W

F2 - Processing parameters  
 SI 32768  
 SF 400.1100102 MHz  
 WDW EM  
 SSB 0  
 LB 0.30 Hz  
 GB 0  
 PC 1.00

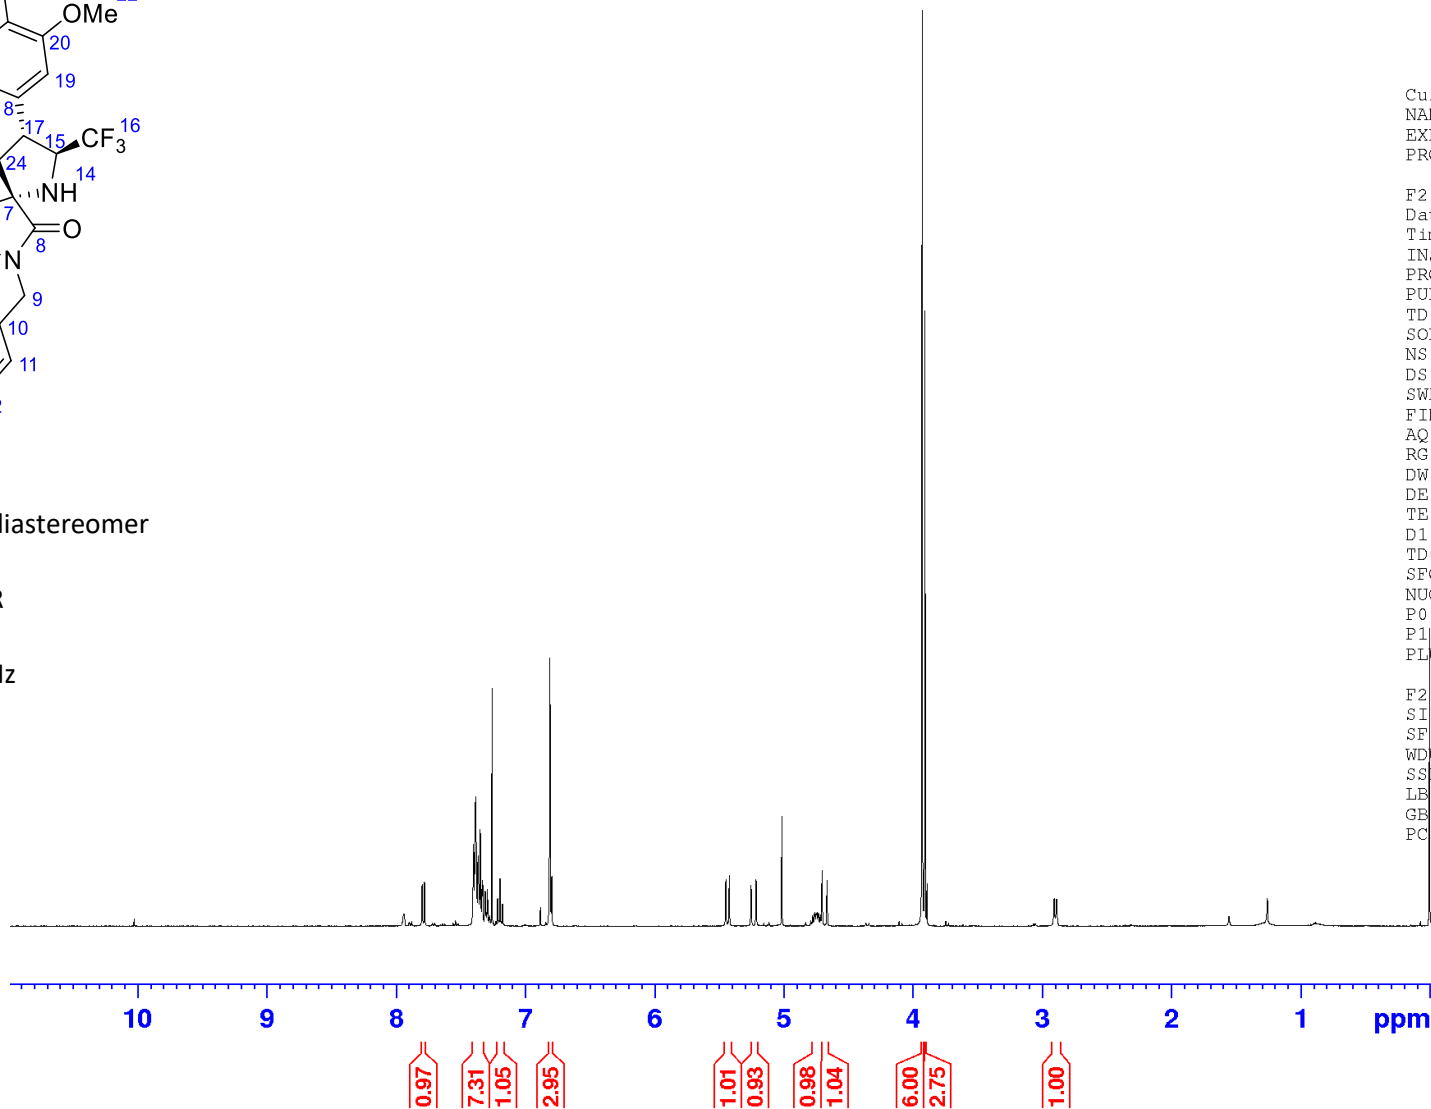



3h

Major diastereomer

<sup>13</sup>C NMR

101 MHz

CDCl<sub>3</sub>

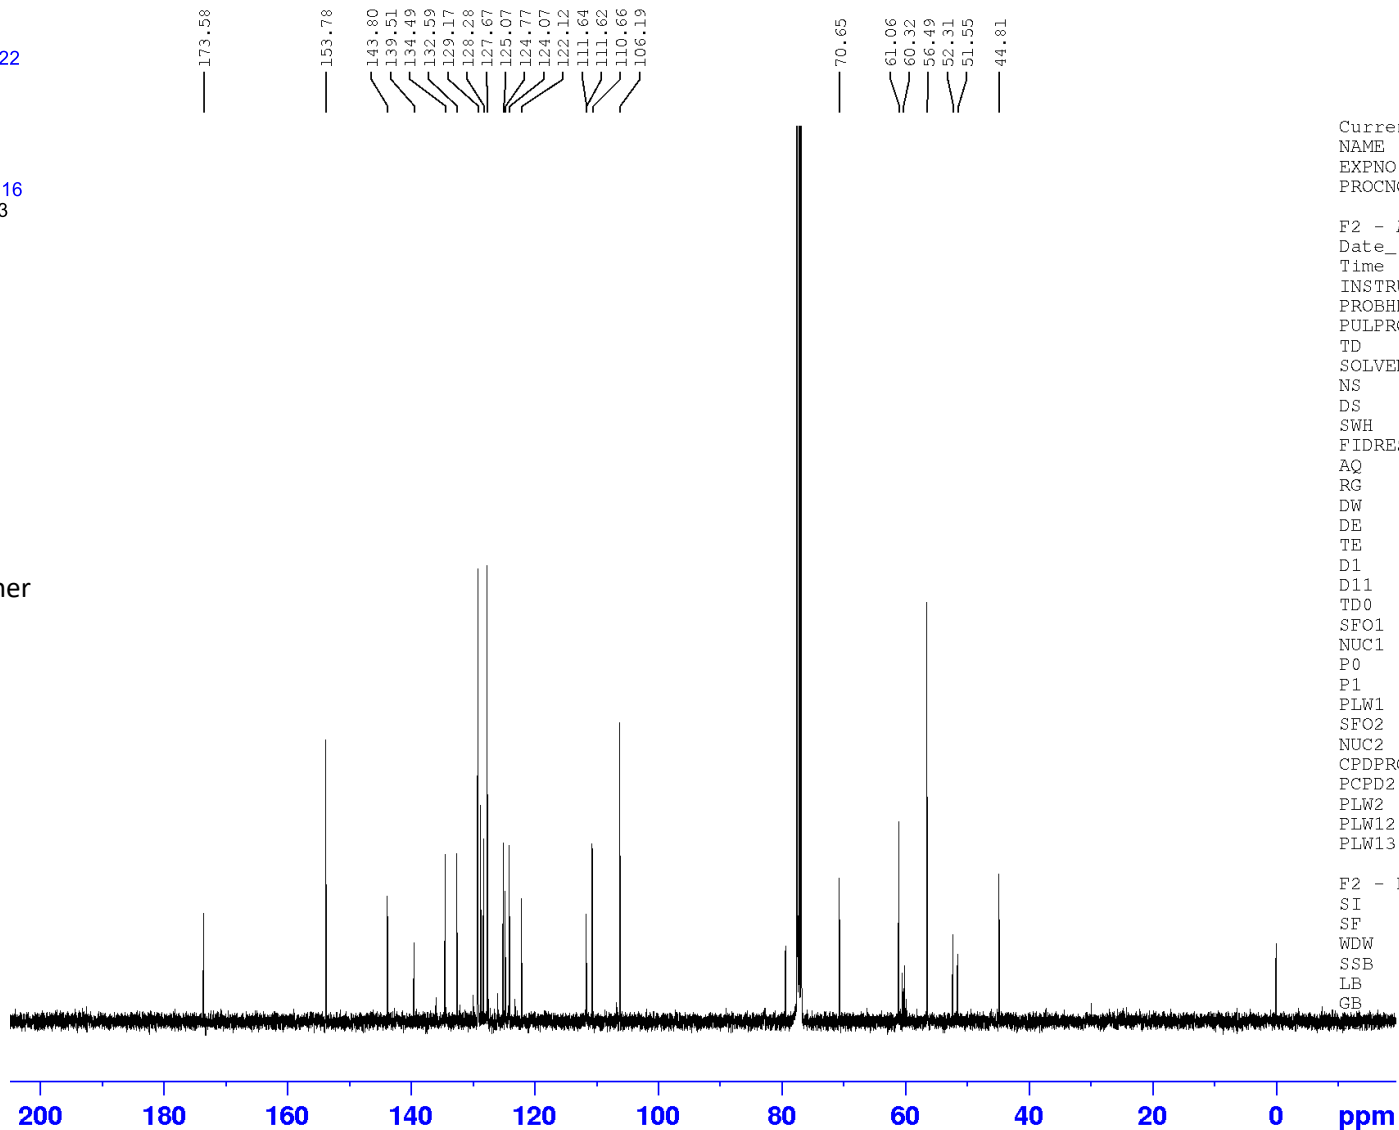

Current Data Parameters  
 NAME WR 2.143  
 EXPNO 11  
 PROCNO 1

F2 - Acquisition Parameters  
 Date\_ 20210417  
 Time 4.56 h  
 INSTRUM AVIII\_400  
 PROBHD Z108618\_0146 ( )  
 PULPROG zgpg30  
 TD 96150  
 SOLVENT CDCl3  
 NS 2048  
 DS 4  
 SWH 24038.461 Hz  
 FIDRES 0.500020 Hz  
 AQ 1.9999200 sec  
 RG 2050  
 DW 20.800 usec  
 DE 6.50 usec  
 TE 300.0 K  
 D1 1.00000000 sec  
 D11 0.03000000 sec  
 TD0 1  
 SFO1 100.6178003 MHz  
 NUC1 13C  
 P0 3.00 usec  
 P1 9.00 usec  
 PLW1 96.68000031 W  
 SFO2 400.1116004 MHz  
 NUC2 1H  
 CPDPRG[2] waltz64  
 PCPD2 90.00 usec  
 PLW2 17.29199982 W  
 PLW12 0.48032999 W  
 PLW13 0.24160001 W

F2 - Processing parameters  
 SI 131072  
 SF 100.6077266 MHz  
 WDW EM  
 SSB 0  
 LB 1.00 Hz  
 GB 0  
 1.40

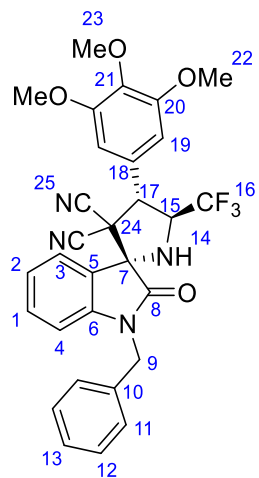

3h

Major diastereomer

<sup>19</sup>F NMR

376 MHz

CDCl<sub>3</sub>

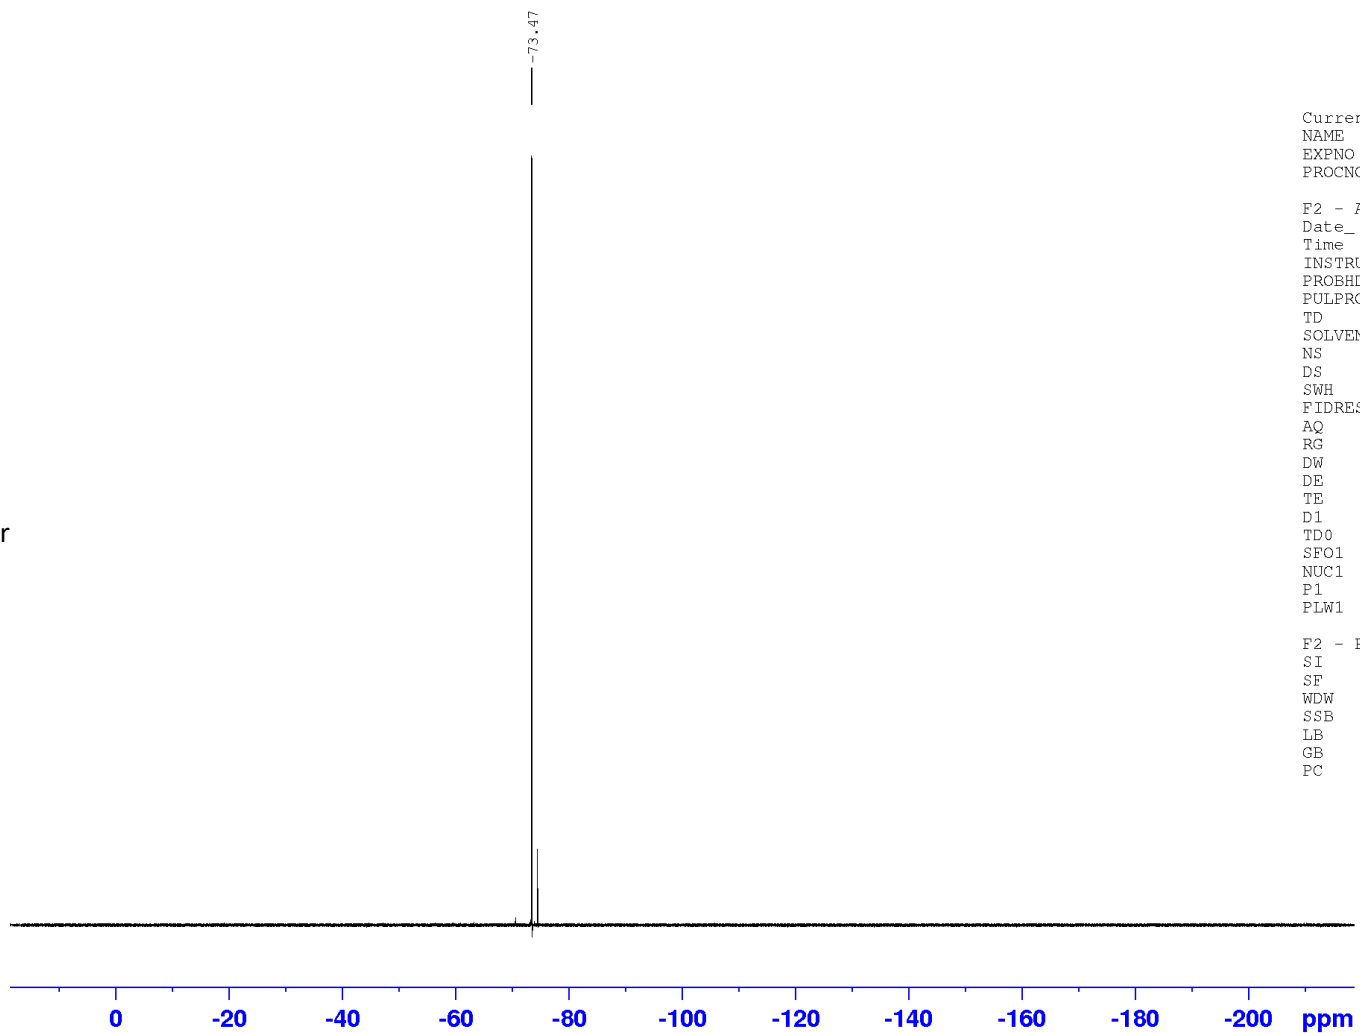

Current Data Parameters  
 NAME WR 2.143  
 EXPNO 33  
 PROCNO 1

F2 - Acquisition Parameters  
 Date\_ 20210621  
 Time 18.30 h  
 INSTRUM AVIII\_400  
 PROBHD Z108618\_0817 (  
 PULPROG zg  
 TD 261992  
 SOLVENT CDCl3  
 NS 16  
 DS 4  
 SWH 89285.711 Hz  
 FIDRES 0.681591 Hz  
 AQ 1.4671552 sec  
 RG 256  
 DW 5.600 usec  
 DE 7.11 usec  
 TE 296.8 K  
 D1 1.00000000 sec  
 TD0 1  
 SFO1 376.2537307 MHz  
 NUC1 19F  
 P1 11.80 usec  
 PLW1 32.96500015 W

F2 - Processing parameters  
 SI 262144  
 SF 376.2913590 MHz  
 WDW EM  
 SSB 0  
 LB 0.30 Hz  
 GB 0  
 PC 1.00

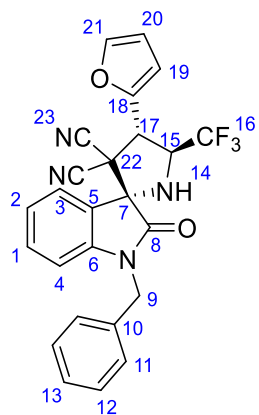

3i

Major diastereomer

<sup>1</sup>H NMR

600 MHz

CDCl<sub>3</sub>

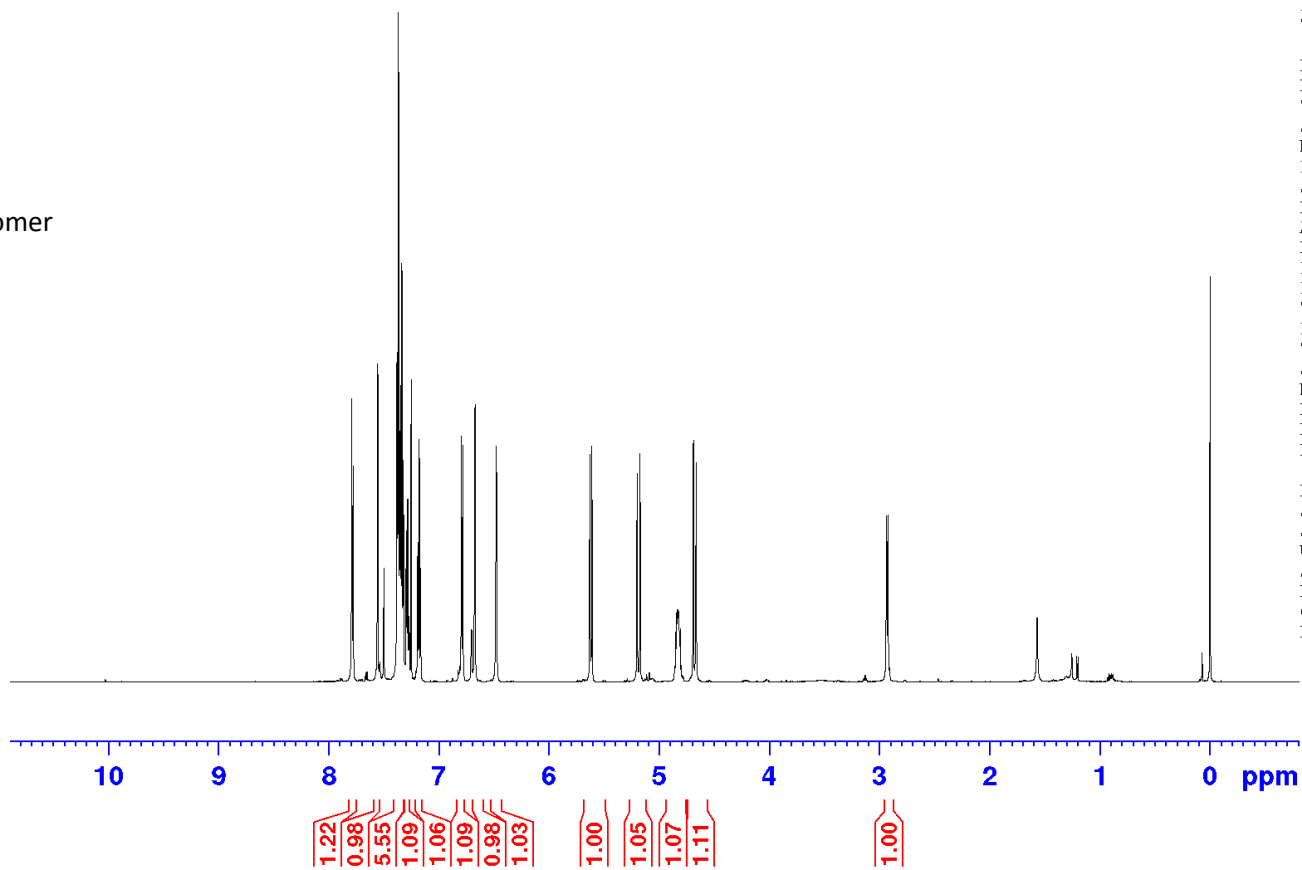

Current Data Parameters  
 NAME WR 2.161 (600)  
 EXPNO 10  
 PROCNO 1

F2 - Acquisition Parameters  
 Date\_ 20210622  
 Time 3.04 h  
 INSTRUM spect  
 PROBHD Z114607\_0188 (  
 PULPROG zg30  
 TD 65536  
 SOLVENT CDCl3  
 NS 16  
 DS 2  
 SWH 12019.230 Hz  
 FIDRES 0.366798 Hz  
 AQ 2.7262976 sec  
 RG 83.95  
 DW 41.600 usec  
 DE 12.10 usec  
 TE 301.7 K  
 D1 1.00000000 sec  
 TD0 1  
 SFO1 600.1337058 MHz  
 NUC1 1H  
 P0 3.33 usec  
 P1 10.00 usec  
 PLW1 26.60000038 W

F2 - Processing parameters  
 SI 65536  
 SF 600.1300169 MHz  
 WDW EM  
 SSB 0  
 LB 0.30 Hz  
 GB 0  
 PC 1.00



3i

Major diastereomer

<sup>13</sup>C NMR

151 MHz

CDCl<sub>3</sub>

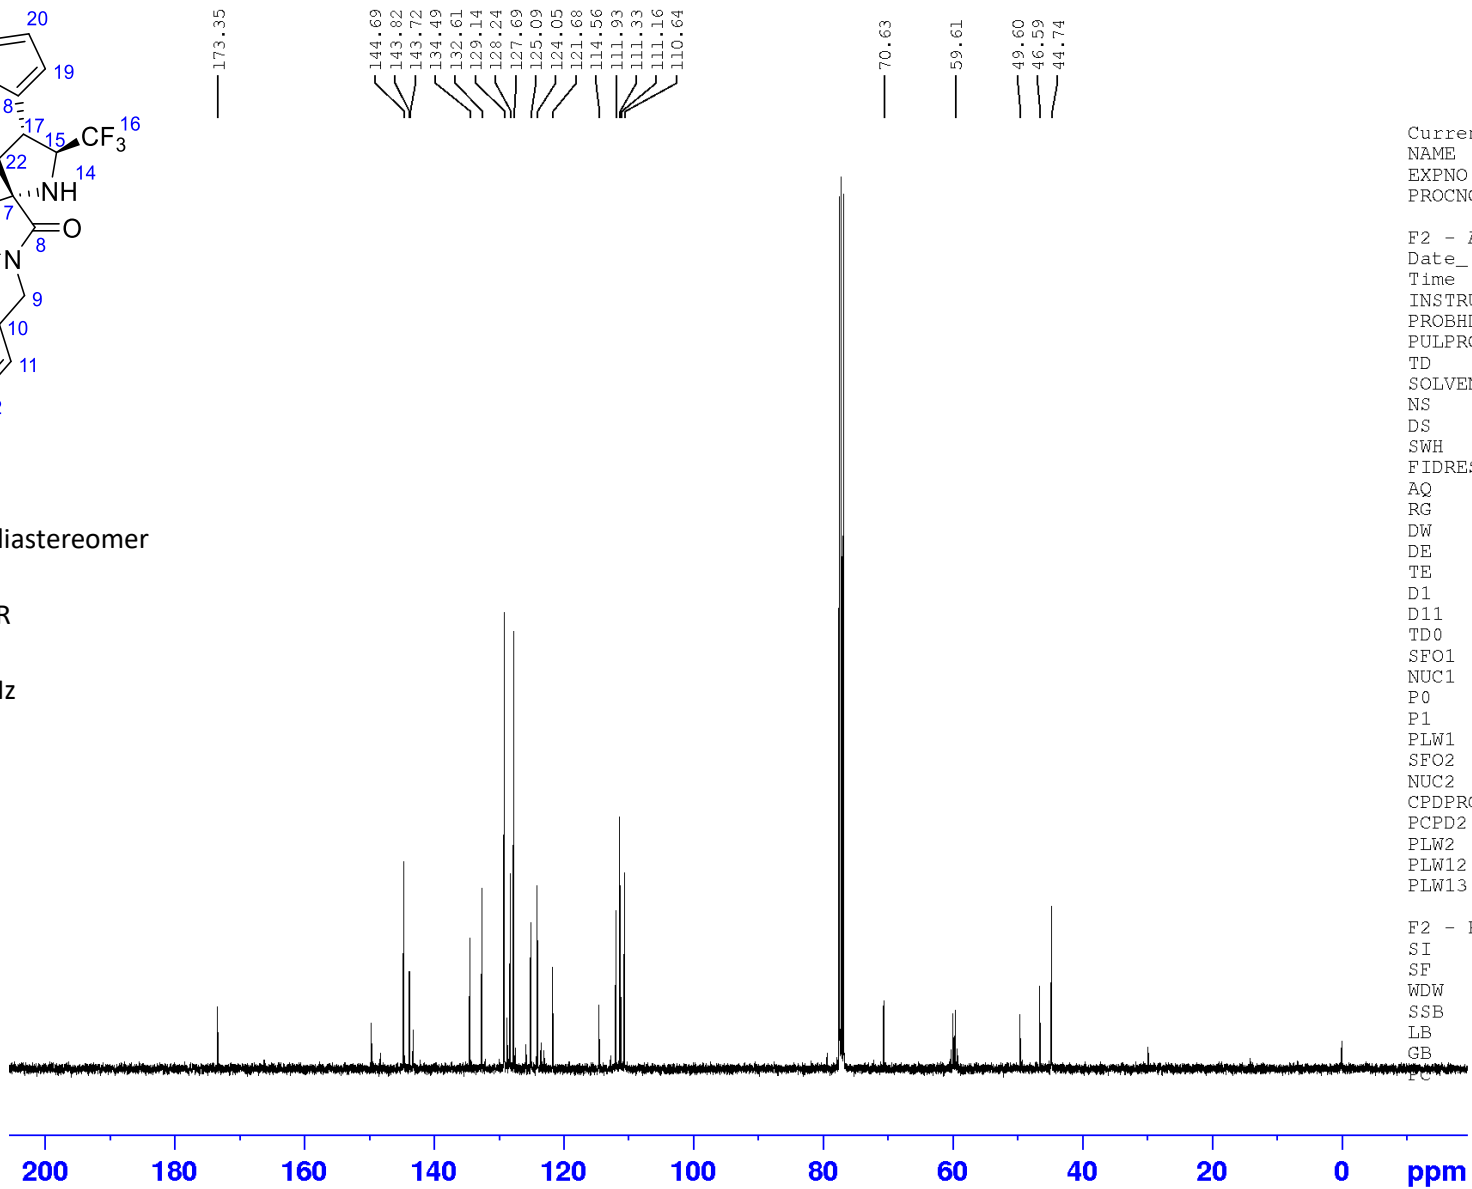

Current Data Parameters  
NAME WR 2.161  
EXPNO 12  
PROCNO 1

F2 - Acquisition Parameters  
Date\_ 20210430  
Time 18.05 h  
INSTRUM AVIII\_400  
PROBHD Z108618\_0146 (  
PULPROG zgpg30  
TD 96150  
SOLVENT CDC13  
NS 1024  
DS 4  
SWH 24038.461 Hz  
FIDRES 0.500020 Hz  
AQ 1.9999200 sec  
RG 2050  
DW 20.800 usec  
DE 6.50 usec  
TE 300.0 K  
D1 1.00000000 sec  
D11 0.03000000 sec  
TD0 1  
SFO1 100.6178003 MHz  
NUC1 13C  
P0 3.00 usec  
P1 9.00 usec  
PLW1 96.68000031 W  
SFO2 400.1116004 MHz  
NUC2 1H  
CPDPRG[2] waltz64  
PCPD2 90.00 usec  
PLW2 17.29199982 W  
PLW12 0.48032999 W  
PLW13 0.24160001 W

F2 - Processing parameters  
SI 131072  
SF 100.6077271 MHz  
WDW EM  
SSB 0  
LB 1.00 Hz  
GB 0  
PC 1.40



3i

Major diastereomer

<sup>19</sup>F NMR

564 MHz

CDCl<sub>3</sub>

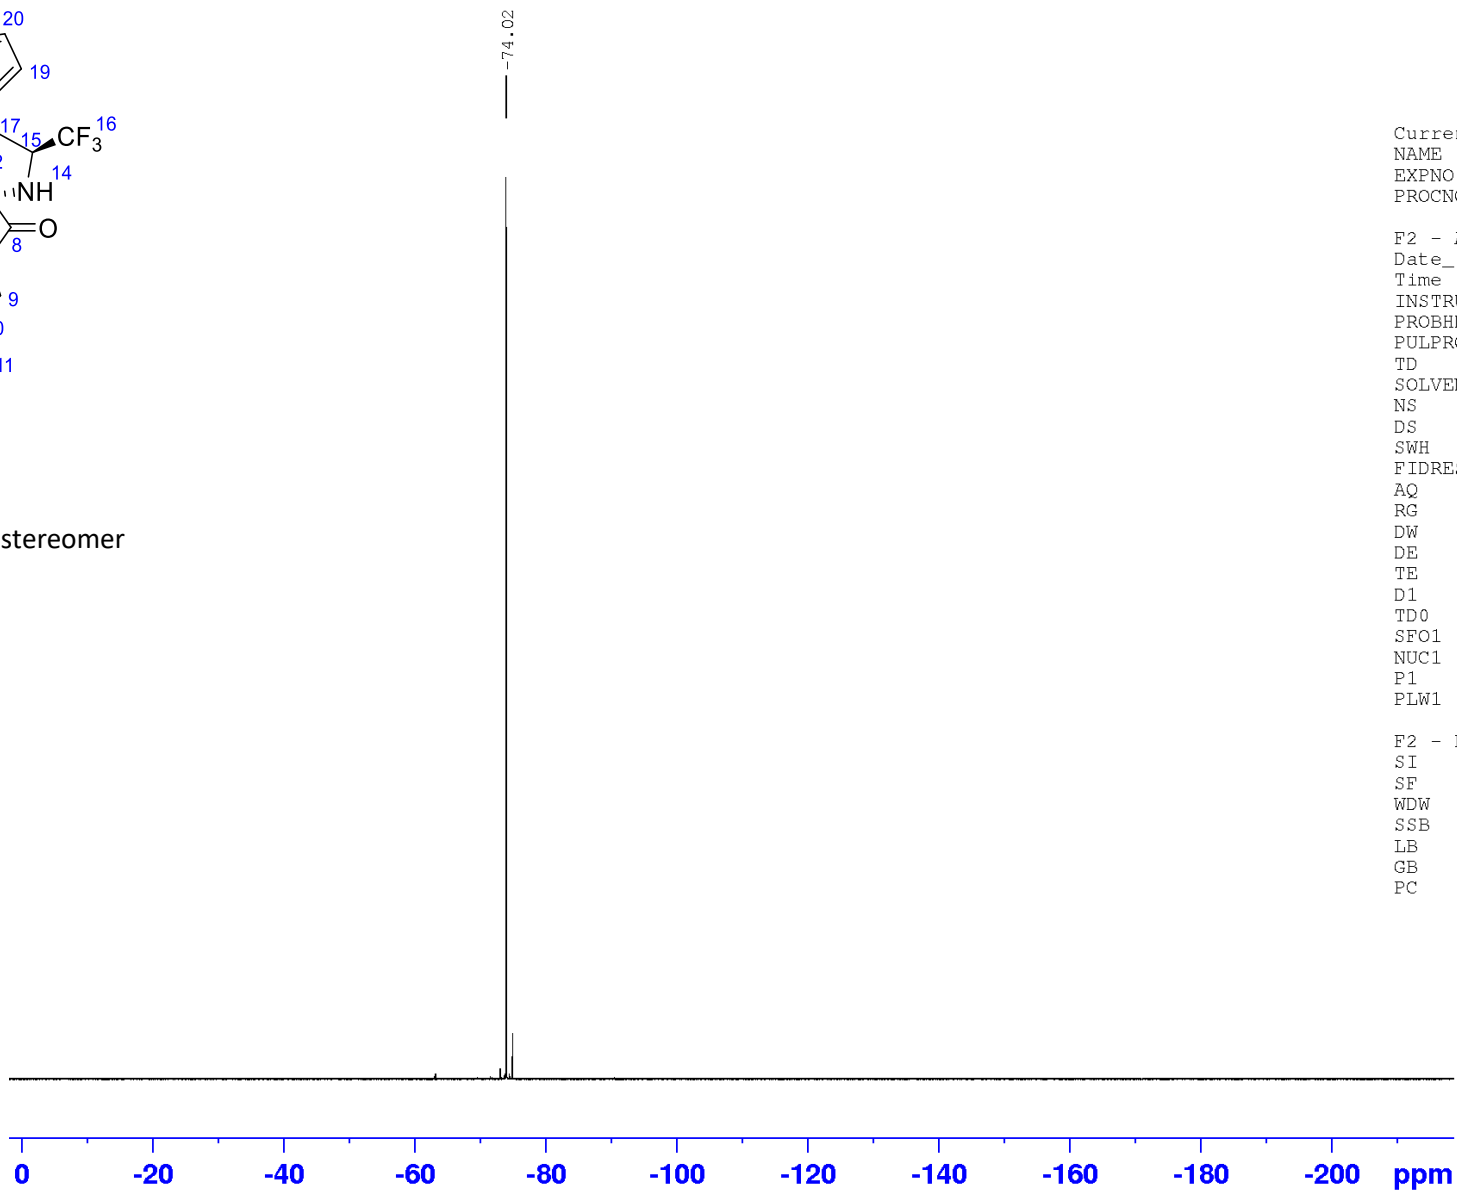

Current Data Parameters  
 NAME WR 2.161  
 EXPNO 11  
 PROCNO 1

F2 - Acquisition Parameters  
 Date\_ 20210430  
 Time 16.55 h  
 INSTRUM AVIII\_400  
 PROBHD Z108618\_0146 ( )  
 PULPROG zg  
 TD 261992  
 SOLVENT CDC13  
 NS 16  
 DS 4  
 SWH 89285.711 Hz  
 FIDRES 0.681591 Hz  
 AQ 1.4671552 sec  
 RG 645  
 DW 5.600 usec  
 DE 7.11 usec  
 TE 300.0 K  
 D1 1.00000000 sec  
 TD0 1  
 SFO1 376.4418995 MHz  
 NUC1 19F  
 P1 11.80 usec  
 PLW1 32.96500015 W

F2 - Processing parameters  
 SI 262144  
 SF 376.4795470 MHz  
 WDW EM  
 SSB 0  
 LB 0.30 Hz  
 GB 0  
 PC 1.00

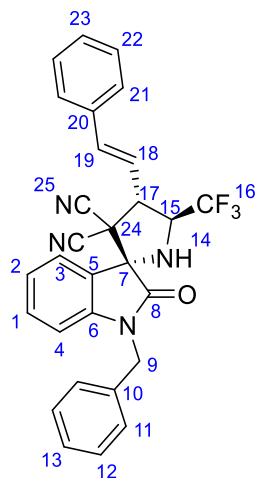

3j

Major diastereomer

<sup>1</sup>H NMR

600 MHz

CDCl<sub>3</sub>

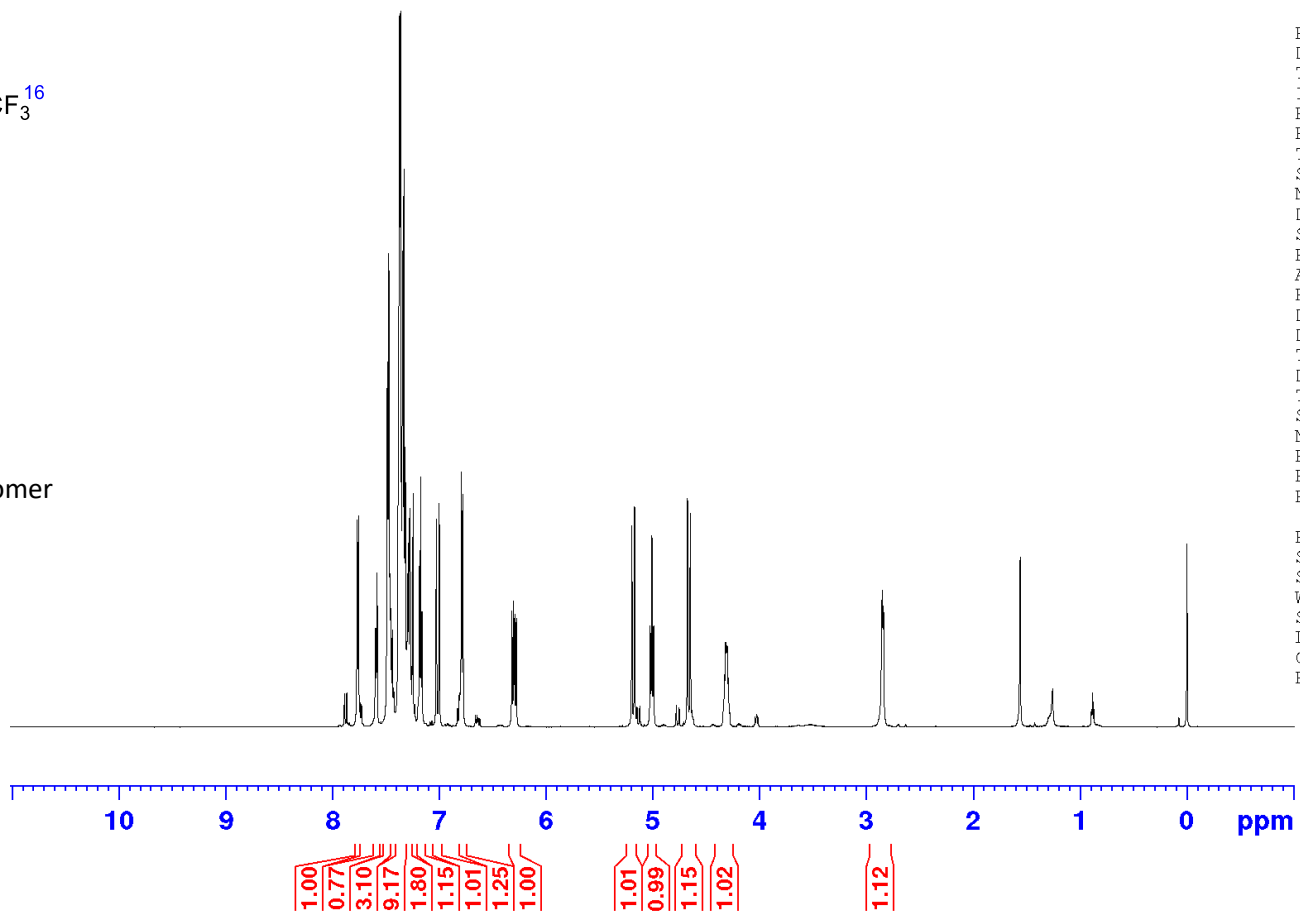

Current Data Parameters  
 NAME WR 2.162 (600)  
 EXPNO 10  
 PROCNO 1

F2 - Acquisition Parameters  
 Date\_ 20210716  
 Time 17.53 h  
 INSTRUM spect  
 PROBHD Z114607\_0188 (  
 PULPROG zg30  
 TD 65536  
 SOLVENT CDCl3  
 NS 16  
 DS 2  
 SWH 12019.230 Hz  
 FIDRES 0.366798 Hz  
 AQ 2.7262976 sec  
 RG 74.91  
 DW 41.600 usec  
 DE 12.10 usec  
 TE 303.8 K  
 D1 1.00000000 sec  
 TD0 1  
 SFO1 600.1337058 MHz  
 NUC1 1H  
 P0 3.33 usec  
 P1 10.00 usec  
 PLW1 26.60000038 W

F2 - Processing parameters  
 SI 65536  
 SF 600.1300211 MHz  
 WDW EM  
 SSB 0  
 LB 0.30 Hz  
 GB 0  
 PC 1.00



3j

Major diastereomer

<sup>13</sup>C NMR

151 MHz

CDCl<sub>3</sub>

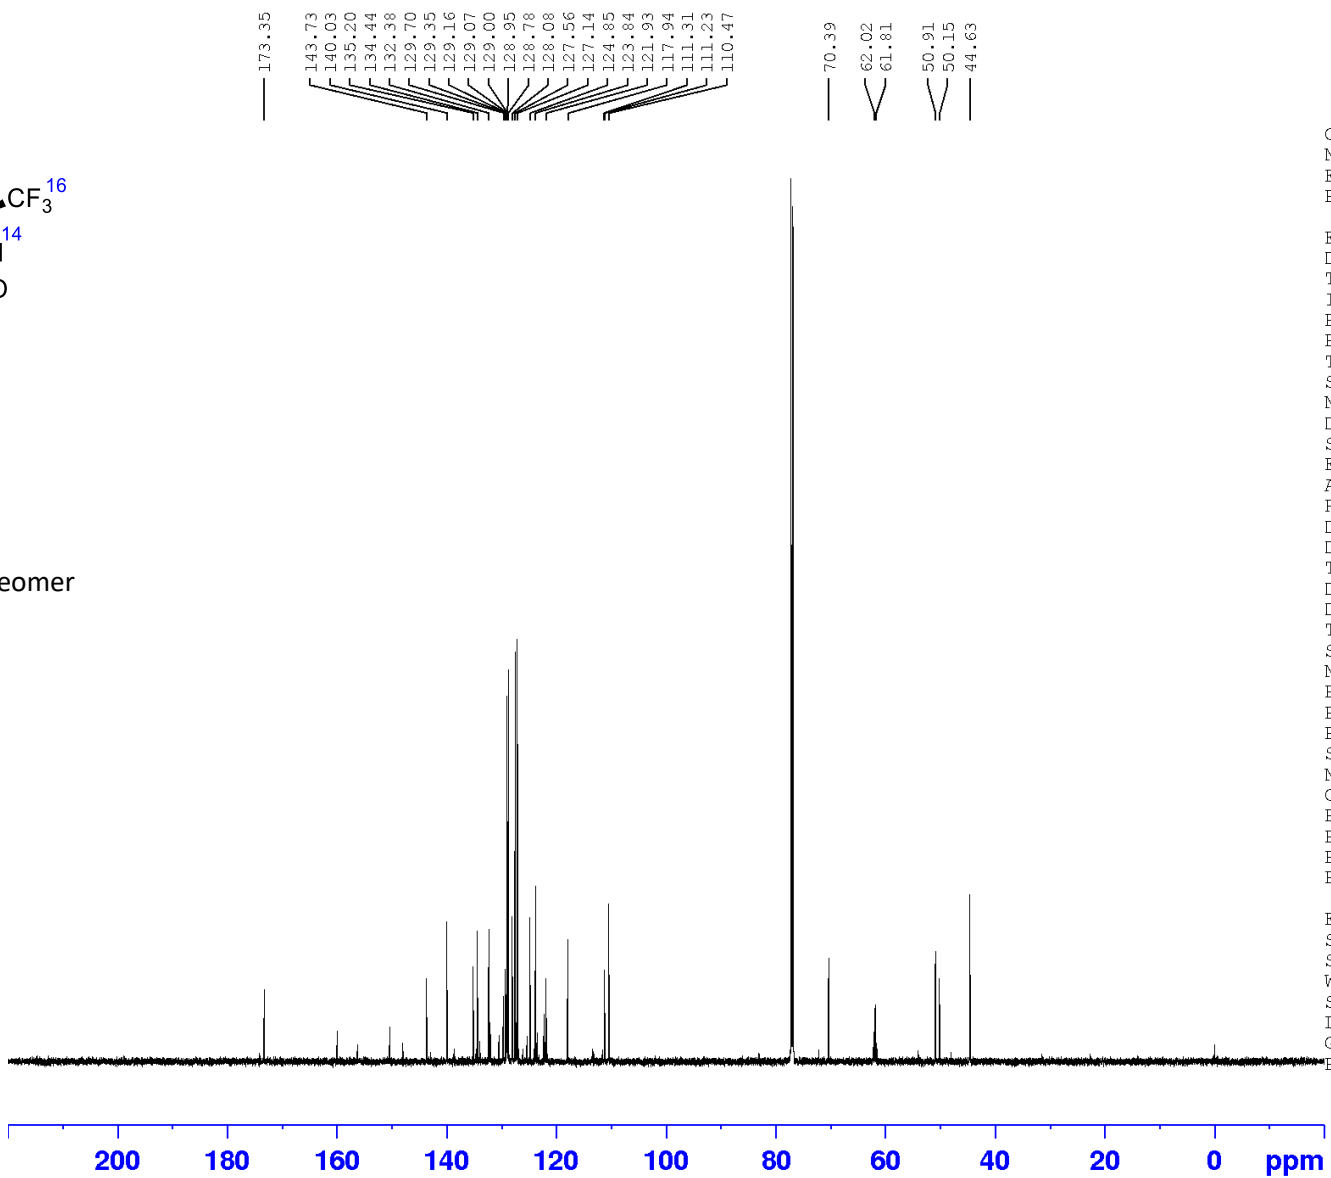

Current Data Parameters  
 NAME WR 2.162 (600)  
 EXPNO 11  
 PROCNO 1

F2 - Acquisition Parameters  
 Date\_ 20210716  
 Time 18.44 h  
 INSTRUM spect  
 PROBHD Z114607\_0188 (  
 PULPROG zgpg30  
 TD 65536  
 SOLVENT CDCl3  
 NS 1024  
 DS 4  
 SWH 36231.883 Hz  
 FIDRES 1.105709 Hz  
 AQ 0.9043968 sec  
 RG 186.92  
 DW 13.800 usec  
 DE 6.50 usec  
 TE 305.6 K  
 D1 2.0000000 sec  
 D11 0.03000000 sec  
 TD0 1  
 SFO1 150.9178988 MHz  
 NUC1 13C  
 P0 3.93 usec  
 P1 11.80 usec  
 PLW1 85.00000000 W  
 SFO2 600.1324005 MHz  
 NUC2 1H  
 CPDPRG[2] waltz65  
 PCPD2 70.00 usec  
 PLW2 27.00000000 W  
 PLW12 0.57327998 W  
 PLW13 0.28836000 W

F2 - Processing parameters  
 SI 32768  
 SF 150.9028085 MHz  
 WDW EM  
 SSB 0  
 LB 1.00 Hz  
 GB 0  
 PC 1.40





3j

Major diastereomer

<sup>19</sup>F NMR

564 MHz

CDCl<sub>3</sub>

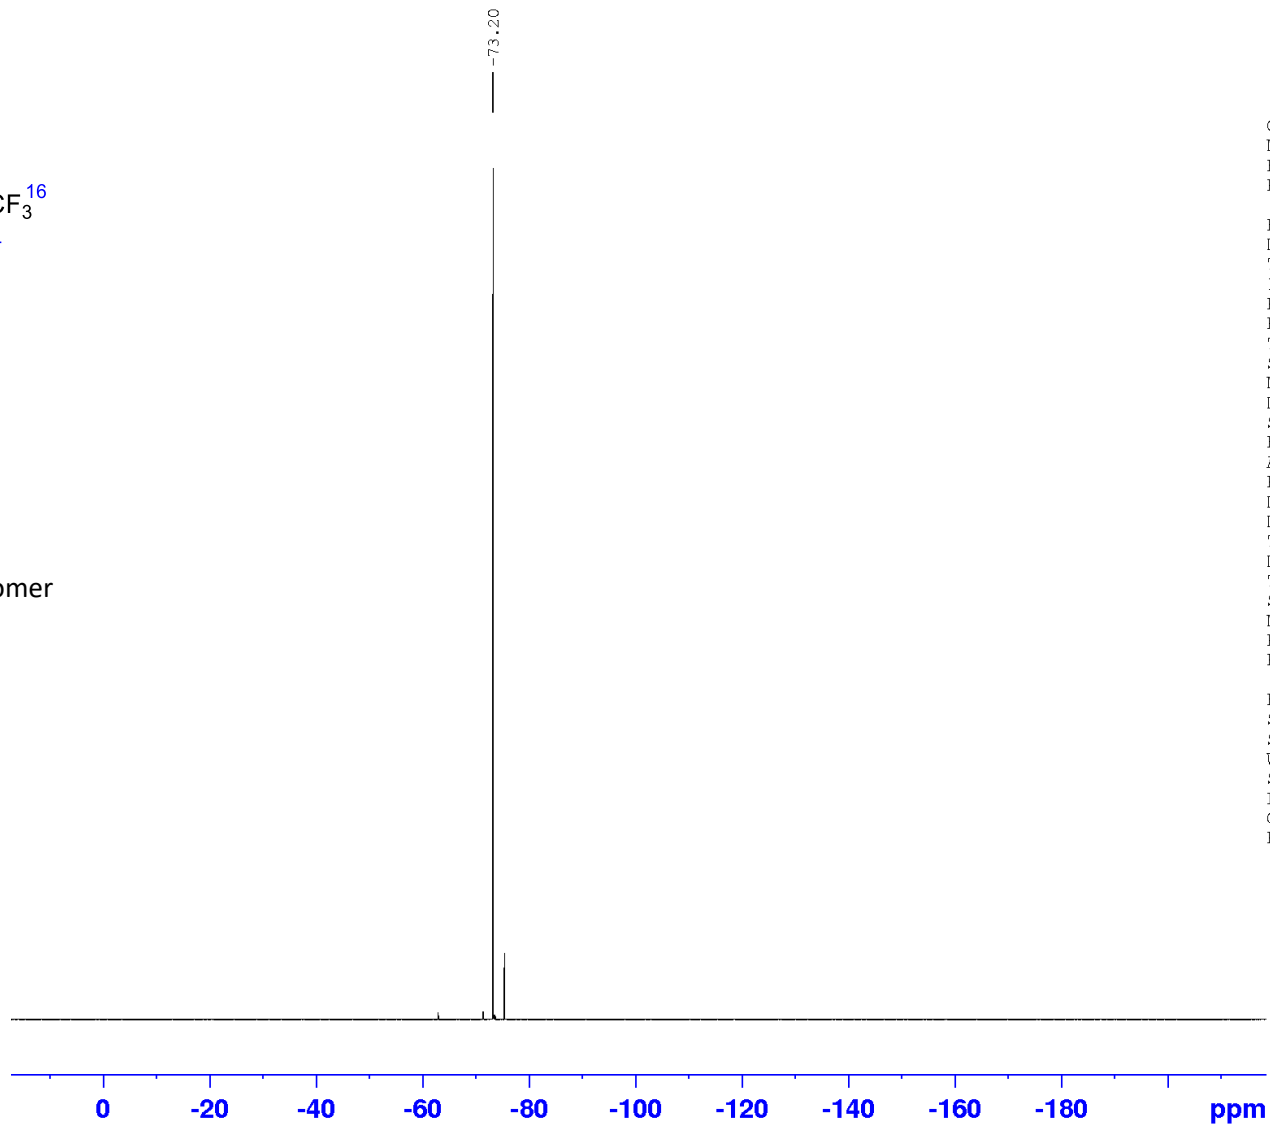

Current Data Parameters  
 NAME WR 2.162 (600)  
 EXPNO 18  
 PROCNO 1

F2 - Acquisition Parameters  
 Date\_ 20210716  
 Time 20.53 h  
 INSTRUM spect  
 PROBHD Z114607\_0188 (  
 PULPROG zgflqn  
 TD 261896  
 SOLVENT CDCl3  
 NS 16  
 DS 4  
 SWH 133928.578 Hz  
 FIDRES 1.022761 Hz  
 AQ 0.9777451 sec  
 RG 186.92  
 DW 3.733 usec  
 DE 6.70 usec  
 TE 303.9 K  
 D1 4.0000000 sec  
 TD0 1  
 SFO1 564.6299217 MHz  
 NUC1 19F  
 P1 12.00 usec  
 PLW1 49.00000000 W

F2 - Processing parameters  
 SI 262144  
 SF 564.6863882 MHz  
 WDW EM  
 SSB 0  
 LB 0.50 Hz  
 GB 0  
 PC 2.00

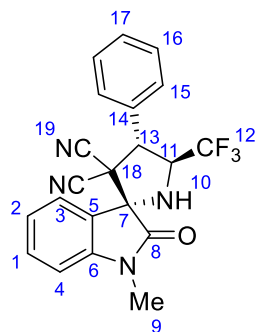

3k

Major diastereomer

<sup>1</sup>H NMR

400 MHz

CDCl<sub>3</sub>

Current Data Parameters  
 NAME WR 2.168 F1  
 EXPNO 20  
 PROCNO 1

F2 - Acquisition Parameters  
 Date\_ 20210706  
 Time 15.20 h  
 INSTRUM AVIII\_400  
 PROBHD Z108618\_0146 (  
 PULPROG zg30  
 TD 65536  
 SOLVENT CDCl3  
 NS 16  
 DS 2  
 SWH 8223.685 Hz  
 FIDRES 0.250967 Hz  
 AQ 3.9845889 sec  
 RG 256  
 DW 60.800 usec  
 DE 17.42 usec  
 TE 300.0 K  
 D1 1.0000000 sec  
 TD0 1  
 SFO1 400.1124708 MHz  
 NUC1 1H  
 P0 5.00 usec  
 P1 15.00 usec  
 PLW1 17.29199982 W

F2 - Processing parameters  
 SI 32768  
 SF 400.1100105 MHz  
 WDW EM  
 SSB 0  
 LB 0.30 Hz  
 GB 0  
 PC 1.00

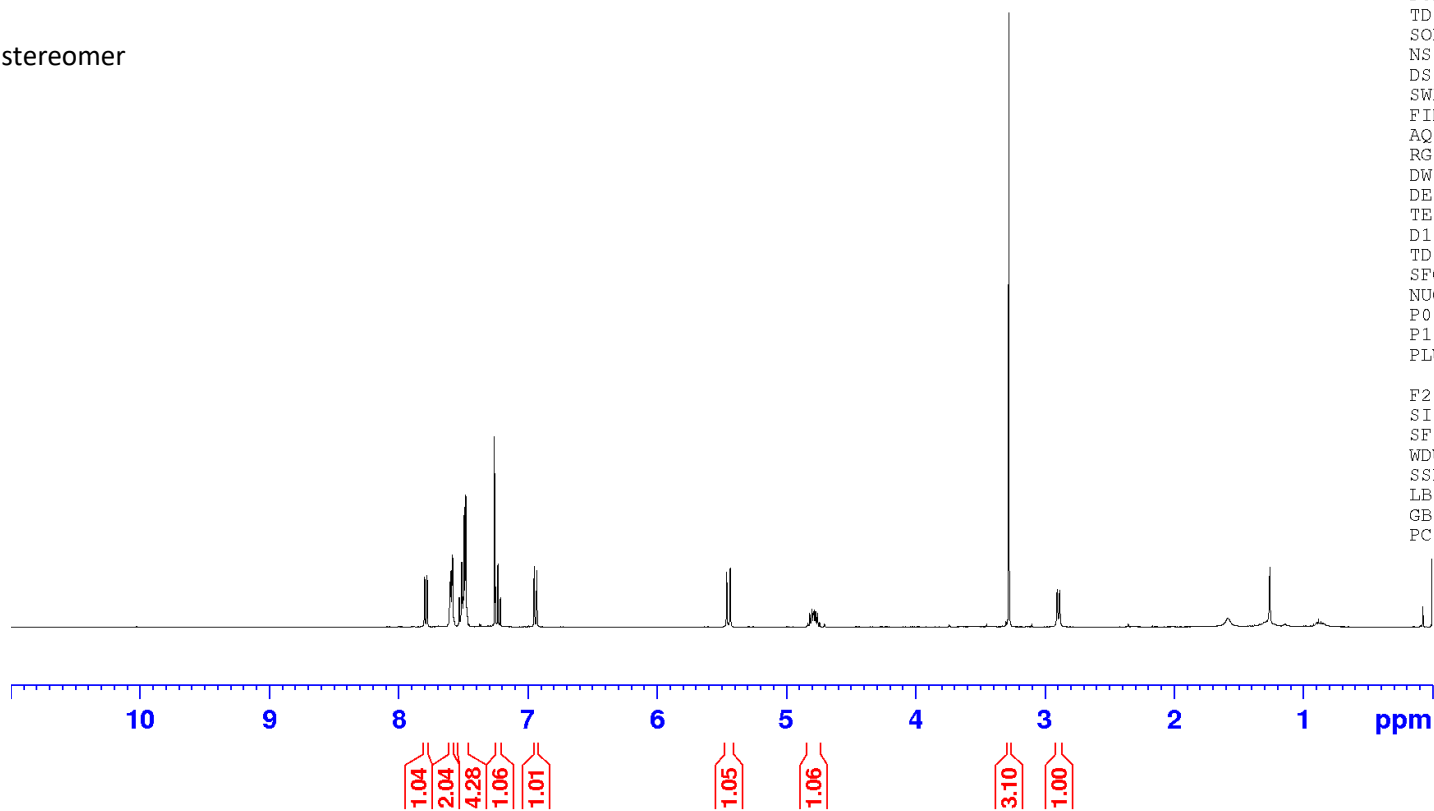

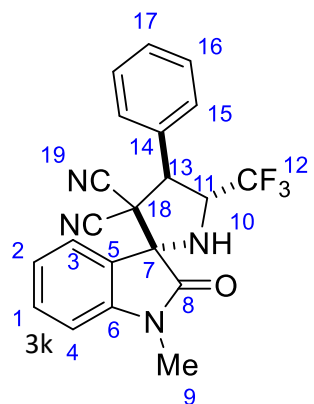

Minor diastereomer

(Purified to ~1:1 mixture with major; peaks corresponding to minor diastereomer integrated)

<sup>1</sup>H NMR

400 MHz

CDCl<sub>3</sub>

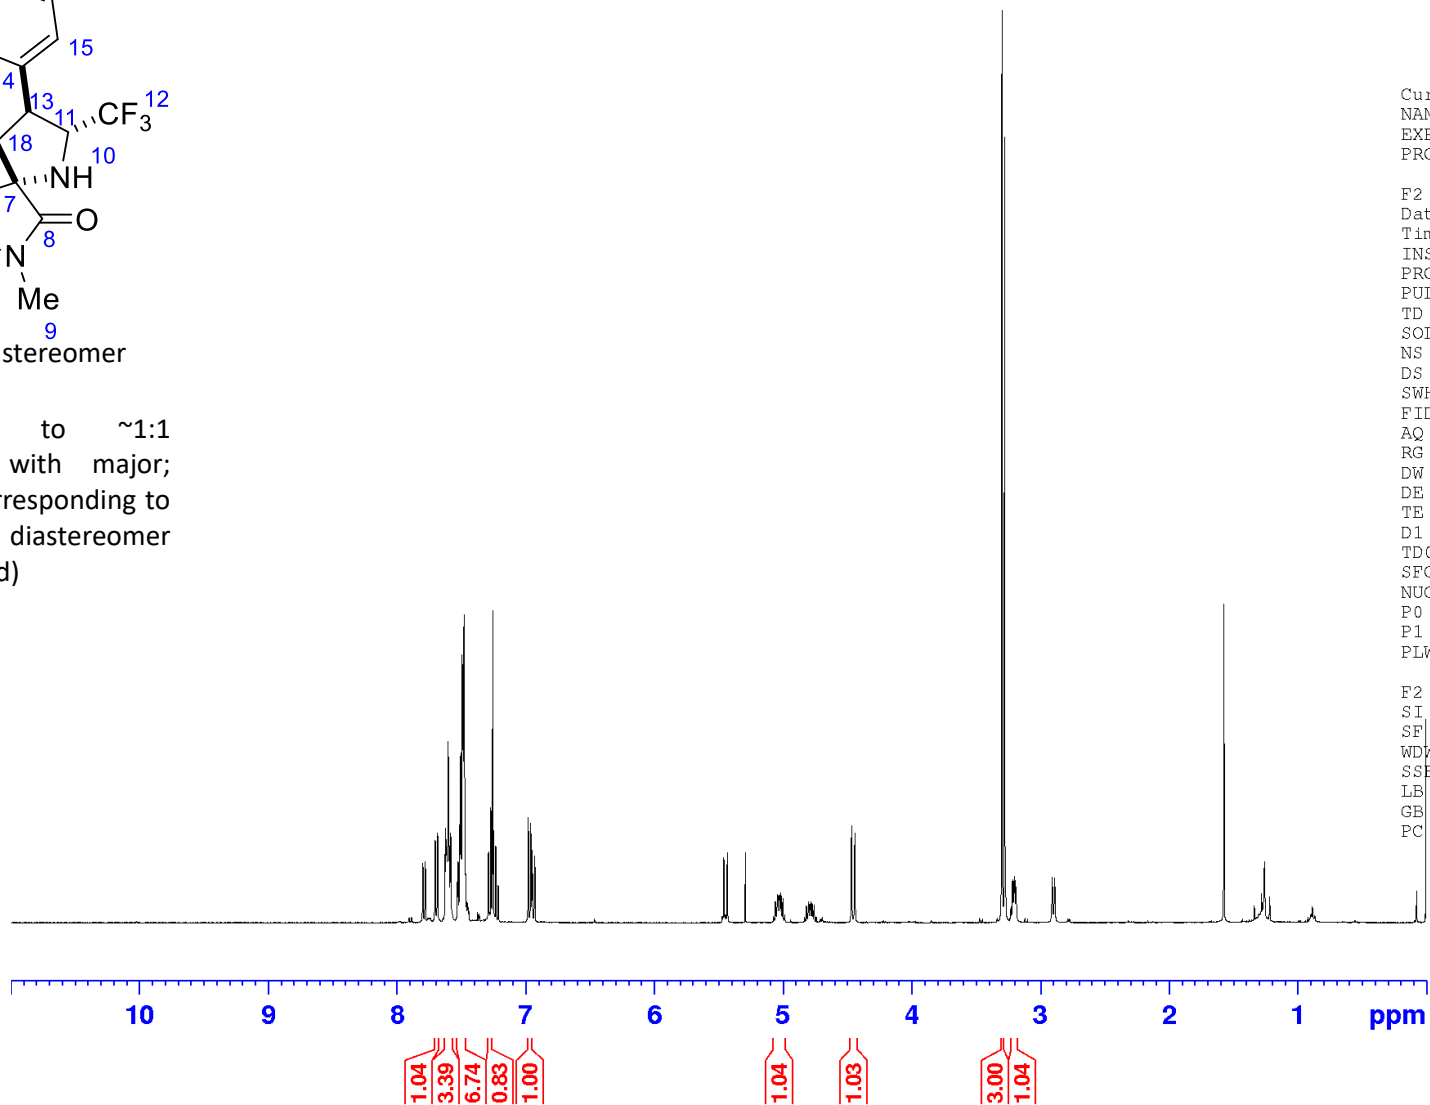

Current Data Parameters  
 NAME WR 2.168 F2  
 EXPNO 20  
 PROCNO 1

F2 - Acquisition Parameters  
 Date\_ 20210706  
 Time 15.28 h  
 INSTRUM AVIII\_400  
 PROBHD Z108618\_0146 ( )  
 PULPROG zg30  
 TD 65536  
 SOLVENT CDCl3  
 NS 16  
 DS 2  
 SWH 8223.685 Hz  
 FIDRES 0.250967 Hz  
 AQ 3.9845889 sec  
 RG 181  
 DW 60.800 usec  
 DE 17.42 usec  
 TE 300.0 K  
 D1 1.0000000 sec  
 TD0 1  
 SFO1 400.1124708 MHz  
 NUC1 1H  
 P0 5.00 usec  
 P1 15.00 usec  
 PLW1 17.29199982 W

F2 - Processing parameters  
 SI 32768  
 SF 400.1100109 MHz  
 WDW EM  
 SSB 0  
 LB 0.30 Hz  
 GB 0  
 PC 1.00



3k

Major diastereomer

<sup>13</sup>C NMR

101 MHz

CDCl<sub>3</sub>

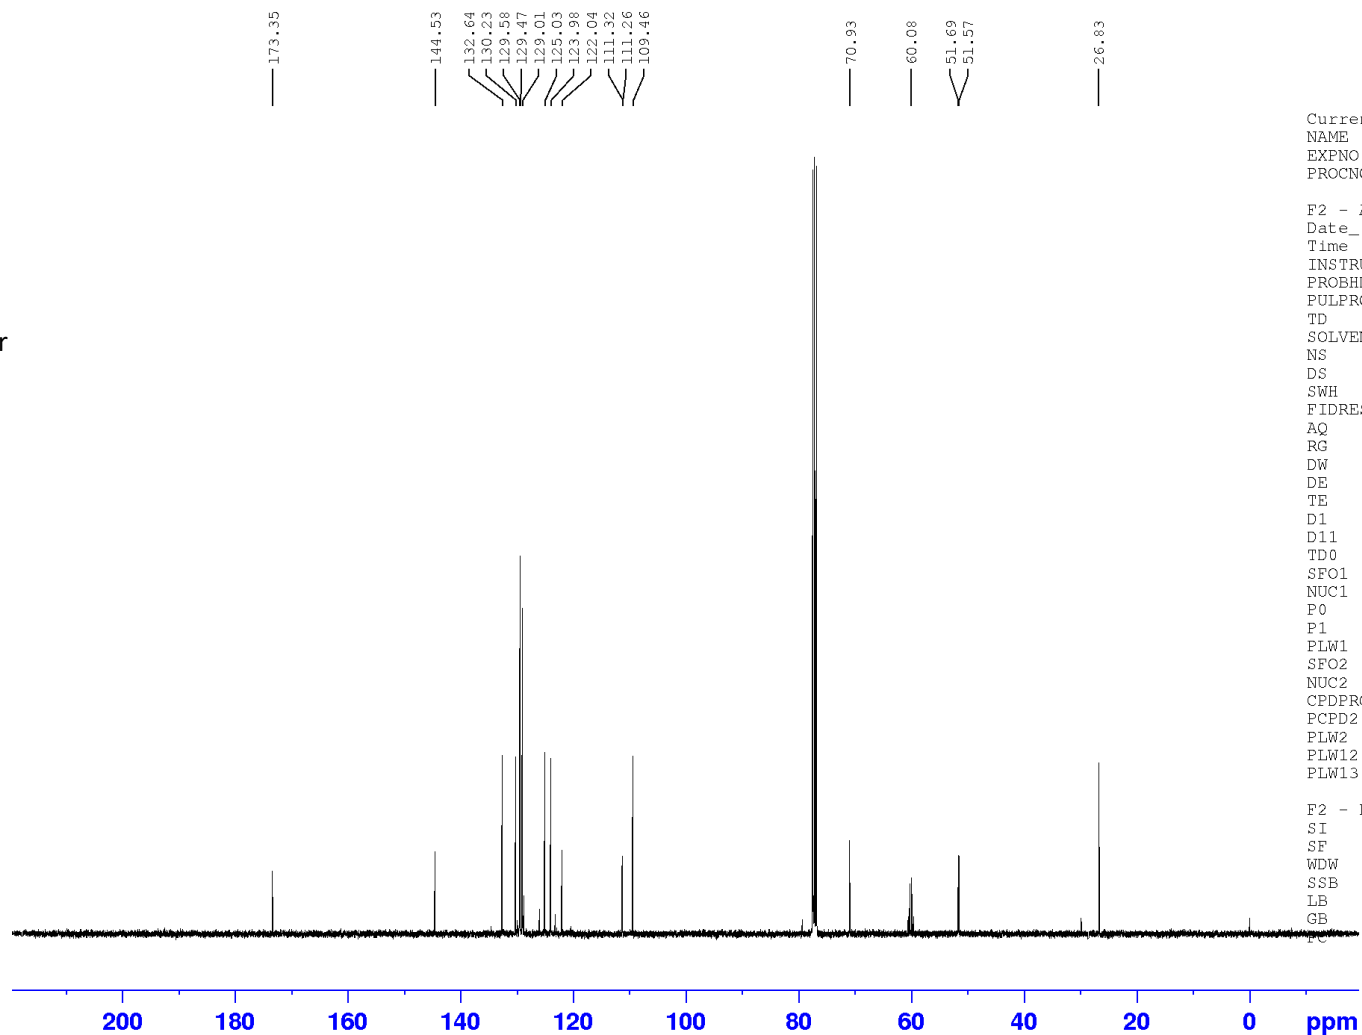

Current Data Parameters  
 NAME WR 2.168 F1 (V2)  
 EXPNO 11  
 PROCNO 1

F2 - Acquisition Parameters  
 Date\_ 20210602  
 Time 19.00 h  
 INSTRUM AVIII\_400  
 PROBHD Z108618\_0146 (  
 PULPROG zgpg30  
 TD 96150  
 SOLVENT CDCl3  
 NS 1024  
 DS 4  
 SWH 24038.461 Hz  
 FIDRES 0.500020 Hz  
 AQ 1.9999200 sec  
 RG 2050  
 DW 20.800 usec  
 DE 6.50 usec  
 TE 300.0 K  
 D1 1.00000000 sec  
 D11 0.03000000 sec  
 TD0 1  
 SFO1 100.6178003 MHz  
 NUC1 13C  
 P0 3.00 usec  
 P1 9.00 usec  
 PLW1 96.68000031 W  
 SFO2 400.1116004 MHz  
 NUC2 1H  
 CPDPRG[2] waltz64  
 PCPD2 90.00 usec  
 PLW2 17.29199982 W  
 PLW12 0.48032999 W  
 PLW13 0.24160001 W

F2 - Processing parameters  
 SI 131072  
 SF 100.6077271 MHz  
 WDW EM  
 SSB 0  
 LB 1.00 Hz  
 GB 0  
 PC 1.40

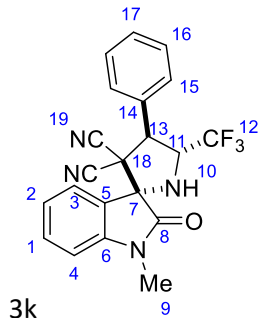

Minor diastereomer

(Purified to ~1:1 mixture with major; peaks corresponding to minor diastereomer indicated)

<sup>13</sup>C NMR

101 MHz

CDCl<sub>3</sub>

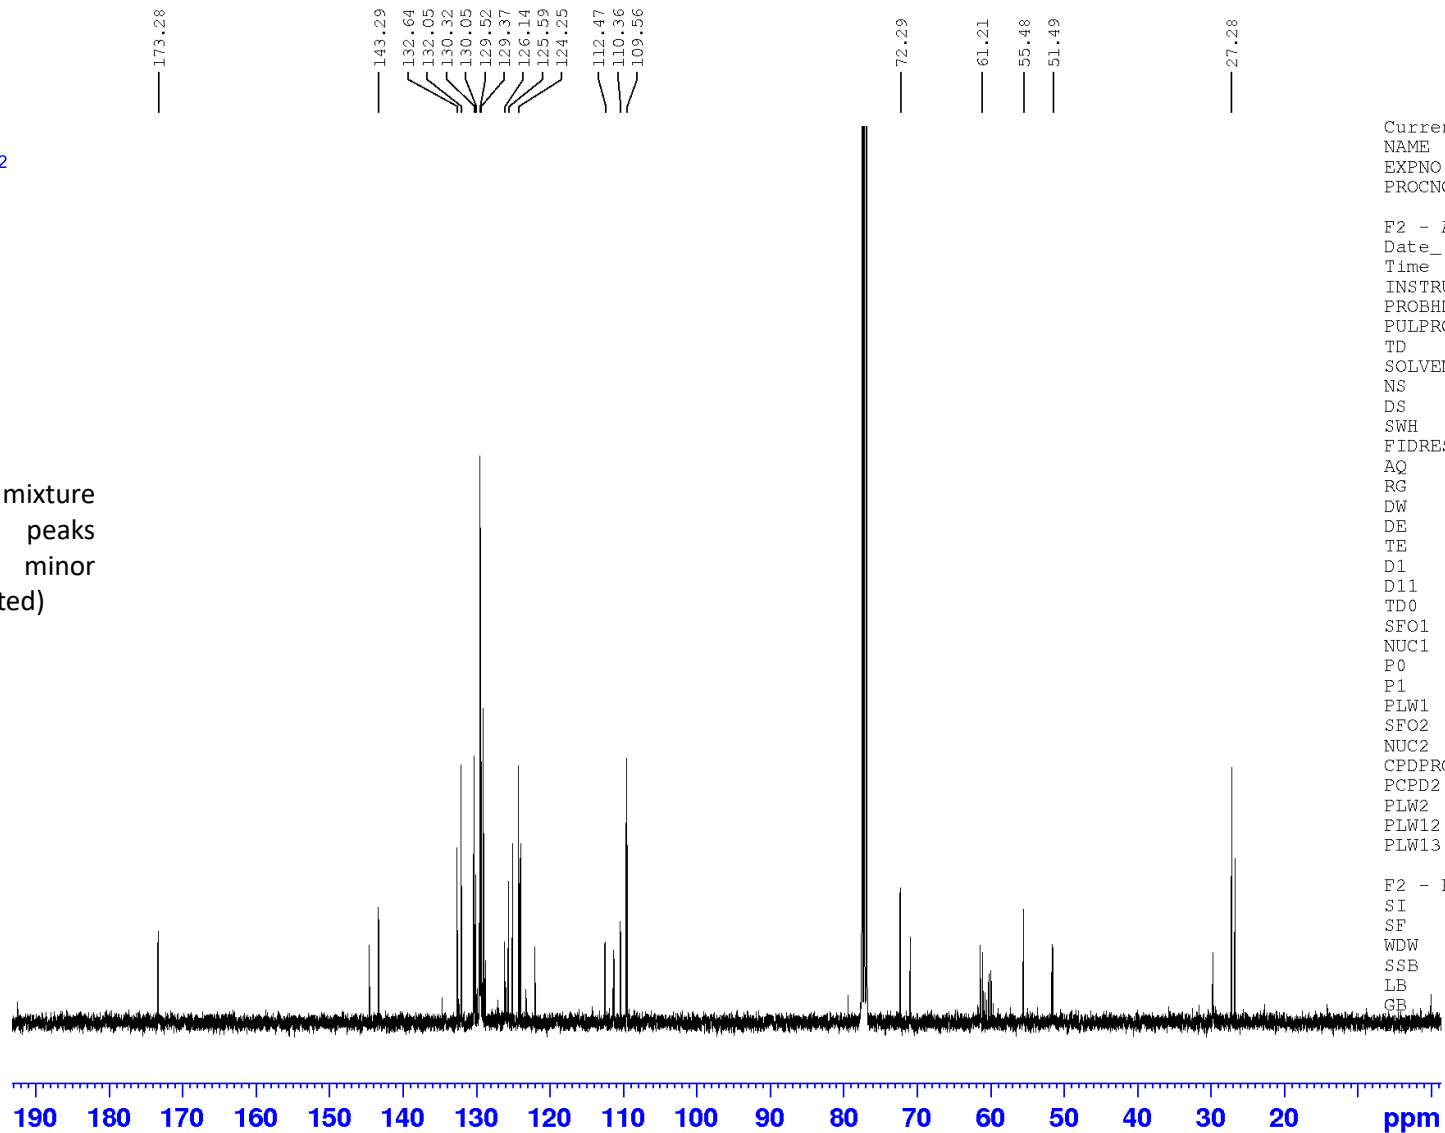

Current Data Parameters  
 NAME WR 2.168 F2 (V2)  
 EXPNO 11  
 PROCNO 1

F2 - Acquisition Parameters  
 Date\_ 20210603  
 Time 5.34 h  
 INSTRUM AVIII\_400  
 PROBHD Z108618\_0146 (  
 PULPROG zgpg30  
 TD 96150  
 SOLVENT CDC13  
 NS 1024  
 DS 4  
 SWH 24038.461 H  
 FIDRES 0.500020 H  
 AQ 1.9999200 s  
 RG 2050  
 DW 20.800 u  
 DE 6.50 u  
 TE 300.0 K  
 D1 1.0000000 s  
 D11 0.0300000 s  
 TD0 1  
 SFO1 100.6178003 M  
 NUC1 13C  
 P0 3.00 u  
 P1 9.00 u  
 PLW1 96.68000031 W  
 SFO2 400.1116004 M  
 NUC2 1H  
 CPDPRG[2] waltz64  
 PCPD2 90.00 u  
 PLW2 17.29199982 W  
 PLW12 0.48032999 W  
 PLW13 0.24160001 W

F2 - Processing parameter  
 SI 131072  
 SF 100.6077271 M  
 WDW EM  
 SSB 0  
 LB 1.00 H  
 GB 0  
 1.40



3k

Major diastereomer

<sup>19</sup>F NMR

376 MHz

CDCl<sub>3</sub>

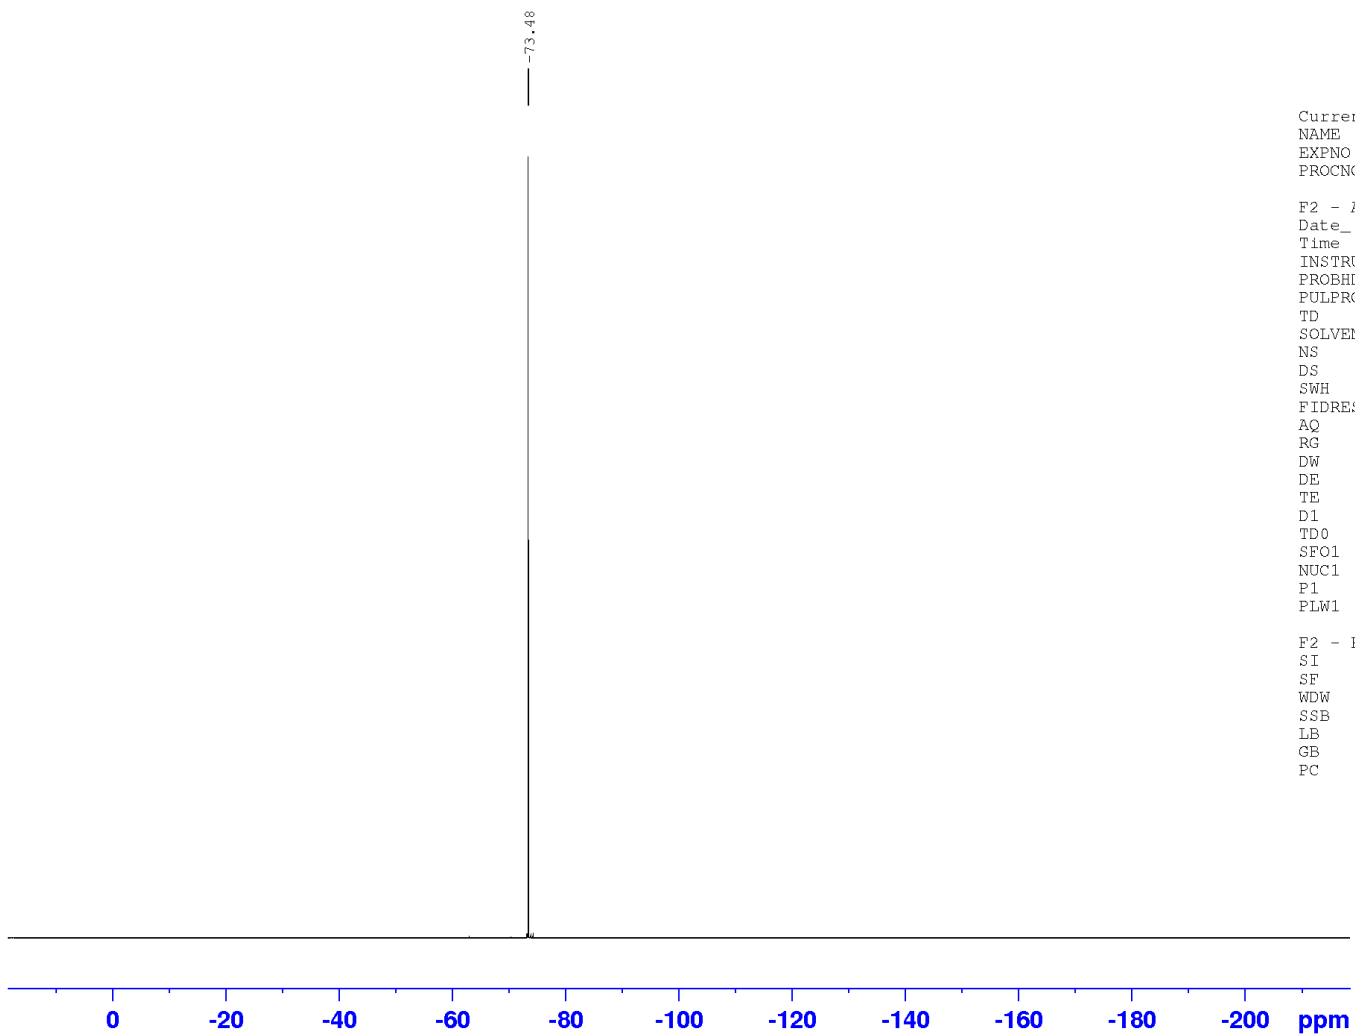

Current Data Parameters  
 NAME WR 2.168 F1 (V2)  
 EXPNO 17  
 PROCNO 1

F2 - Acquisition Parameters  
 Date\_ 20210602  
 Time 17.23 h  
 INSTRUM AVIII\_400  
 PROBHD Z108618\_0146 (  
 PULPROG zg  
 TD 261992  
 SOLVENT CDC13  
 NS 16  
 DS 4  
 SWH 89285.711 Hz  
 FIDRES 0.681591 Hz  
 AQ 1.4671552 sec  
 RG 645  
 DW 5.600 usec  
 DE 7.11 usec  
 TE 300.0 K  
 D1 1.00000000 sec  
 TD0 1  
 SFO1 376.4418995 MHz  
 NUC1 19F  
 P1 11.80 usec  
 PLW1 32.96500015 W

F2 - Processing parameters  
 SI 262144  
 SF 376.4795470 MHz  
 WDW EM  
 SSB 0  
 LB 0.30 Hz  
 GB 0  
 PC 1.00

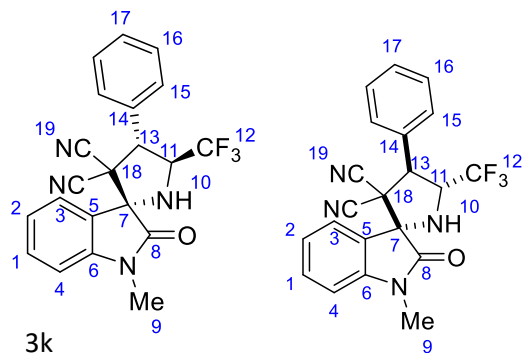

Both diastereomers

(Purified to ~1:1 mixture with major; peak corresponding to minor diastereomer indicated)

$^{19}\text{F}$  NMR

376 MHz

$\text{CDCl}_3$

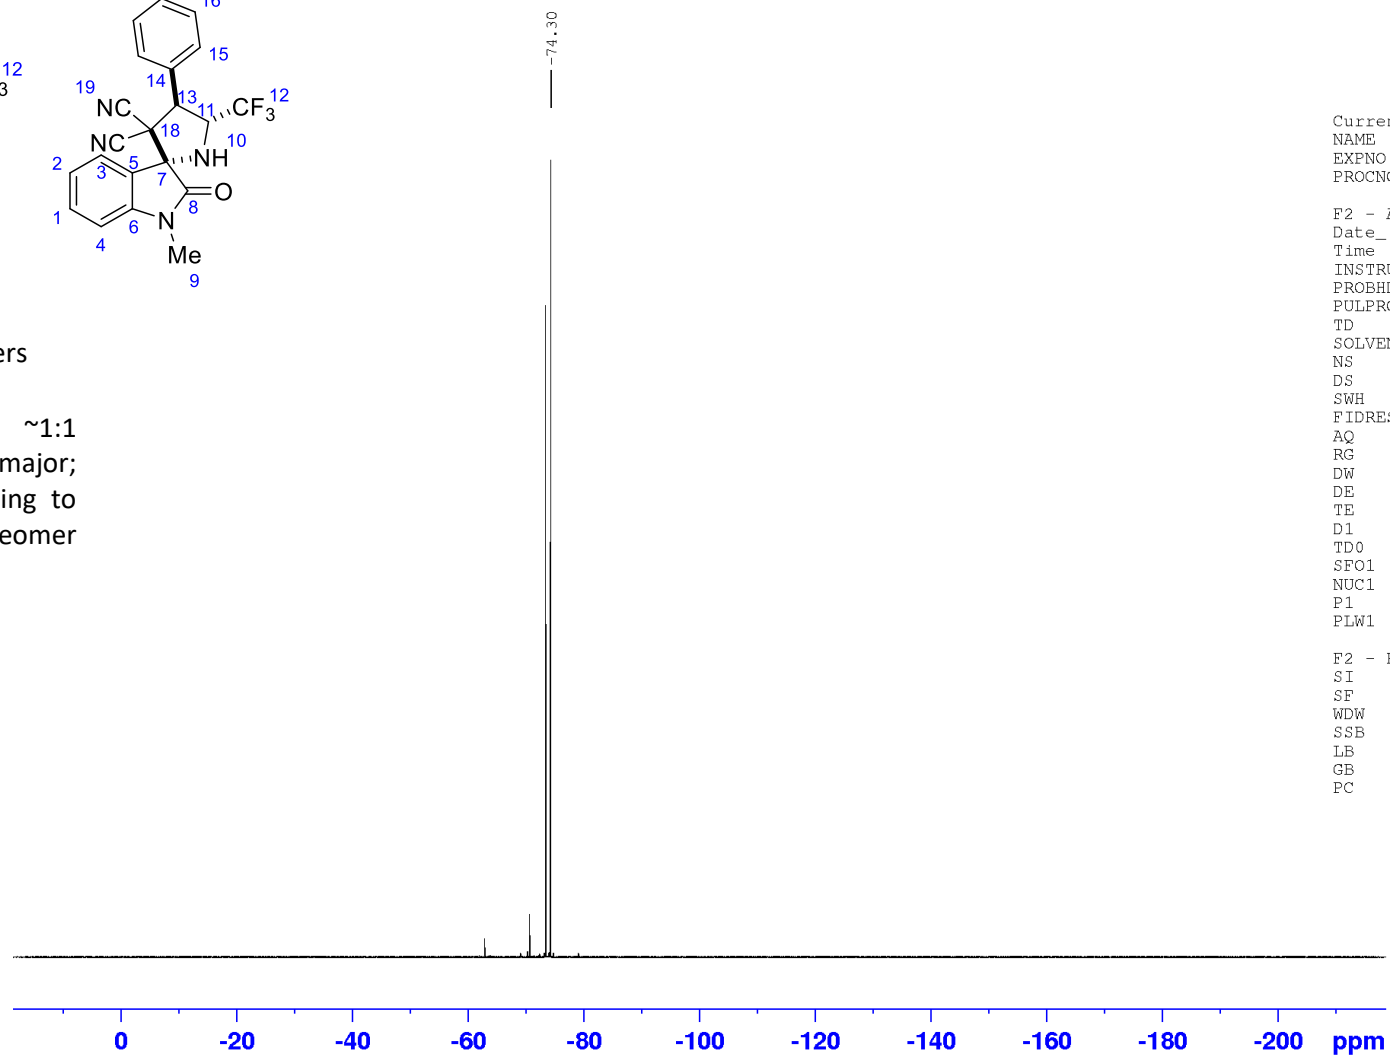

Current Data Parameters  
 NAME WR 2.168 F2 (V2)  
 EXPNO 16  
 PROCNO 1

F2 - Acquisition Parameters  
 Date\_ 20210602  
 Time 17.51 h  
 INSTRUM AVIII\_400  
 PROBHD Z108618\_0146 (  
 PULPROG zg  
 TD 261992  
 SOLVENT CDCl3  
 NS 16  
 DS 4  
 SWH 89285.711 Hz  
 FIDRES 0.681591 Hz  
 AQ 1.4671552 sec  
 RG 645  
 DW 5.600 usec  
 DE 7.11 usec  
 TE 300.0 K  
 D1 1.00000000 sec  
 TD0 1  
 SFO1 376.4418995 MHz  
 NUC1 19F  
 P1 11.80 usec  
 PLW1 32.96500015 W

F2 - Processing parameters  
 SI 262144  
 SF 376.4795470 MHz  
 WDW EM  
 SSB 0  
 LB 0.30 Hz  
 GB 0  
 PC 1.00

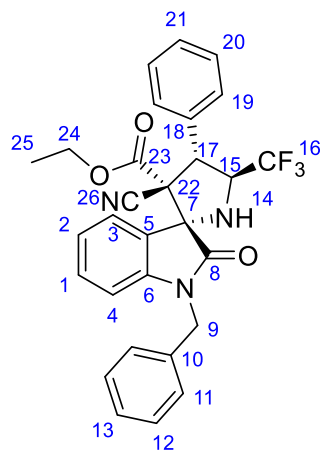

3I

Major diastereomer

<sup>1</sup>H NMR

400 MHz

CDCl<sub>3</sub>

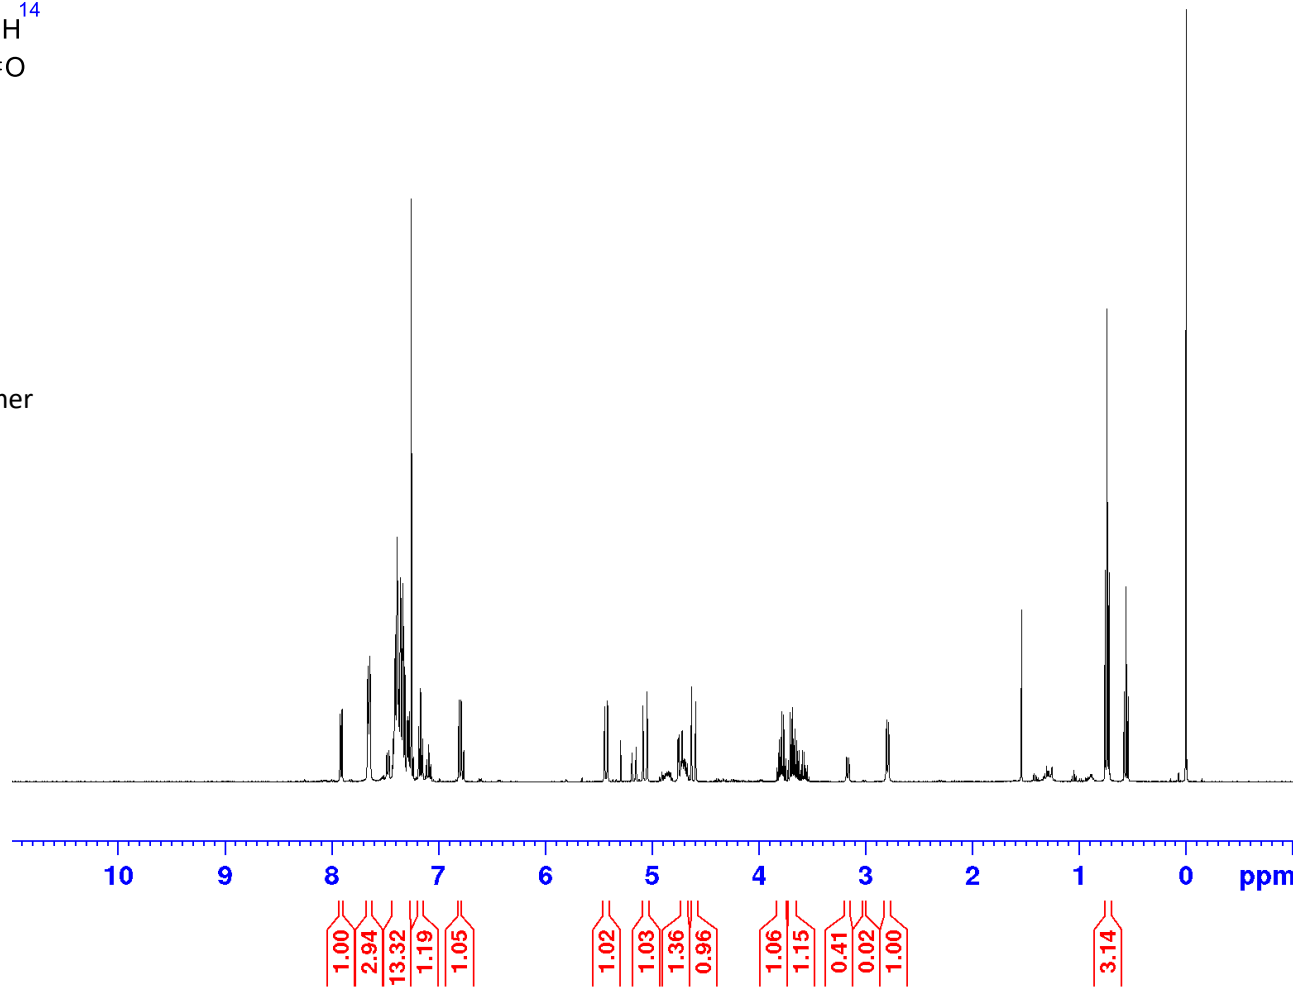

Current Data Parameters  
 NAME WR 2.170  
 EXPNO 30  
 PROCNO 1

F2 - Acquisition Parameters  
 Date\_ 20210702  
 Time 16.51 h  
 INSTRUM AVIII\_400  
 PROBHD Z108618\_0146 {  
 PULPROG zg30  
 TD 65536  
 SOLVENT CDCl3  
 NS 16  
 DS 2  
 SWH 8223.685 Hz  
 FIDRES 0.250967 Hz  
 AQ 3.9845889 sec  
 RG 256  
 DW 60.800 usec  
 DE 17.42 usec  
 TE 300.0 K  
 D1 1.00000000 sec  
 TDO 1  
 SFO1 400.1124708 MHz  
 NUC1 1H  
 P0 5.00 usec  
 P1 15.00 usec  
 PLW1 17.29199982 W

F2 - Processing parameters  
 SI 32768  
 SF 400.1100108 MHz  
 WDW EM  
 SSB 0  
 LB 0.30 Hz  
 GB 0  
 PC 1.00



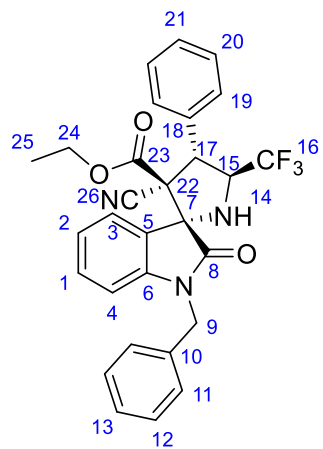

3I

Minor diastereomer

<sup>1</sup>H NMR

400 MHz

CDCl<sub>3</sub>

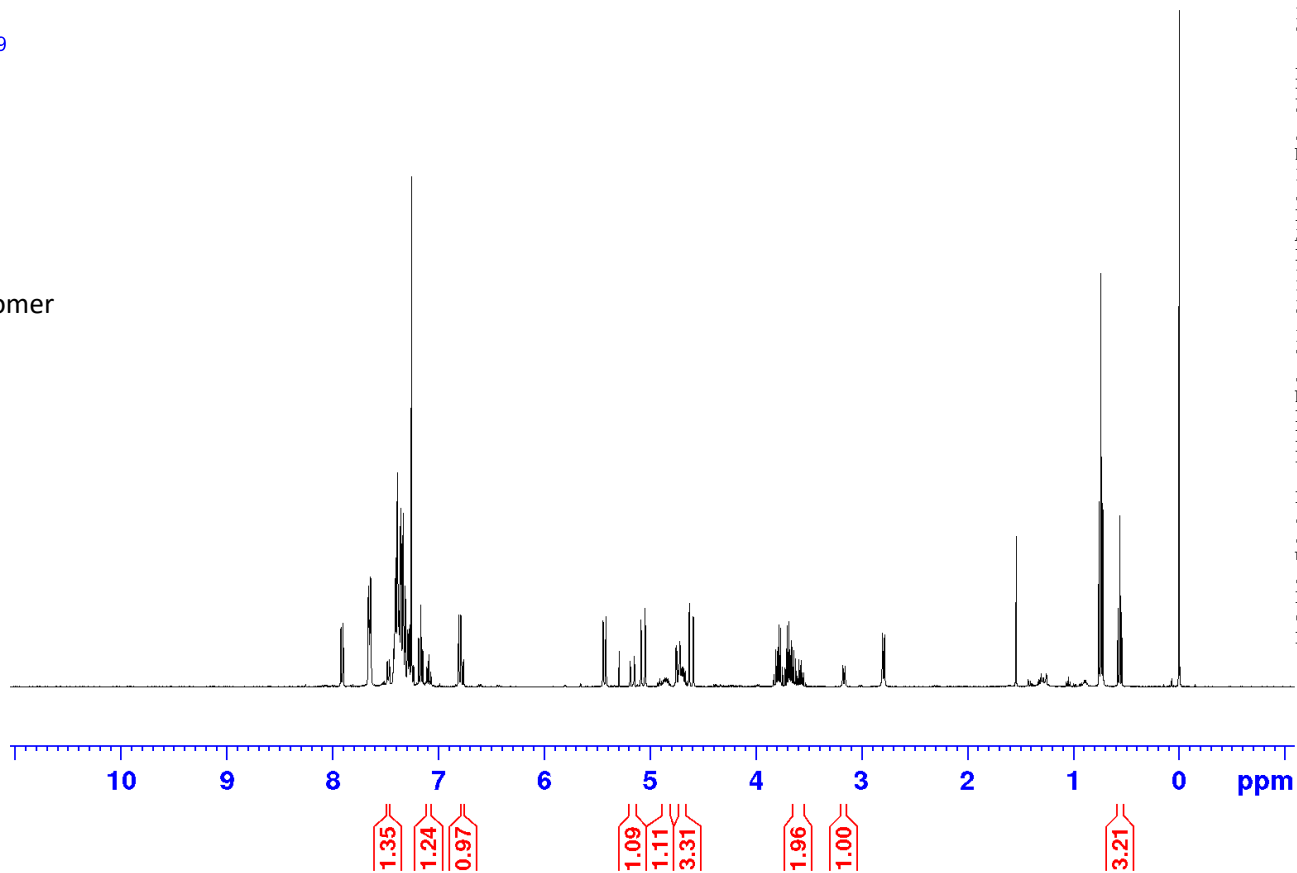

Current Data Parameters  
 NAME WR 2.170  
 EXPNO 32  
 PROCNO 1

F2 - Acquisition Parameters  
 Date\_ 20210702  
 Time 16.51 h  
 INSTRUM AVIII\_400  
 PROBHD Z108618\_0146 (   
 PULPROG zg30  
 TD 65536  
 SOLVENT CDCl3  
 NS 16  
 DS 2  
 SWH 8223.685 Hz  
 FIDRES 0.250967 Hz  
 AQ 3.9845889 sec  
 RG 256  
 DW 60.800 usec  
 DE 17.42 usec  
 TE 300.0 K  
 D1 1.00000000 sec  
 TD0 1  
 SFO1 400.1124708 MHz  
 NUC1 1H  
 P0 5.00 usec  
 P1 15.00 usec  
 PLW1 17.29199982 W

F2 - Processing parameters  
 SI 32768  
 SF 400.1100108 MHz  
 WDW EM  
 SSB 0  
 LB 0.30 Hz  
 GB 0  
 PC 1.00

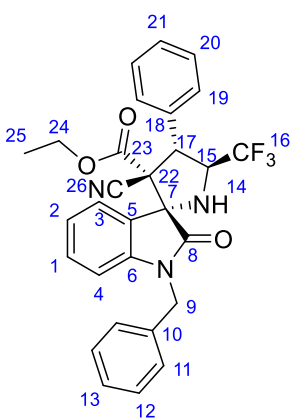

3I

Both diastereomers

<sup>13</sup>C NMR

101 MHz

CDCl<sub>3</sub>

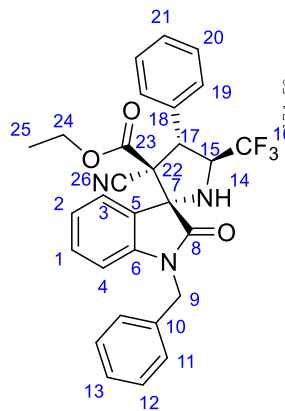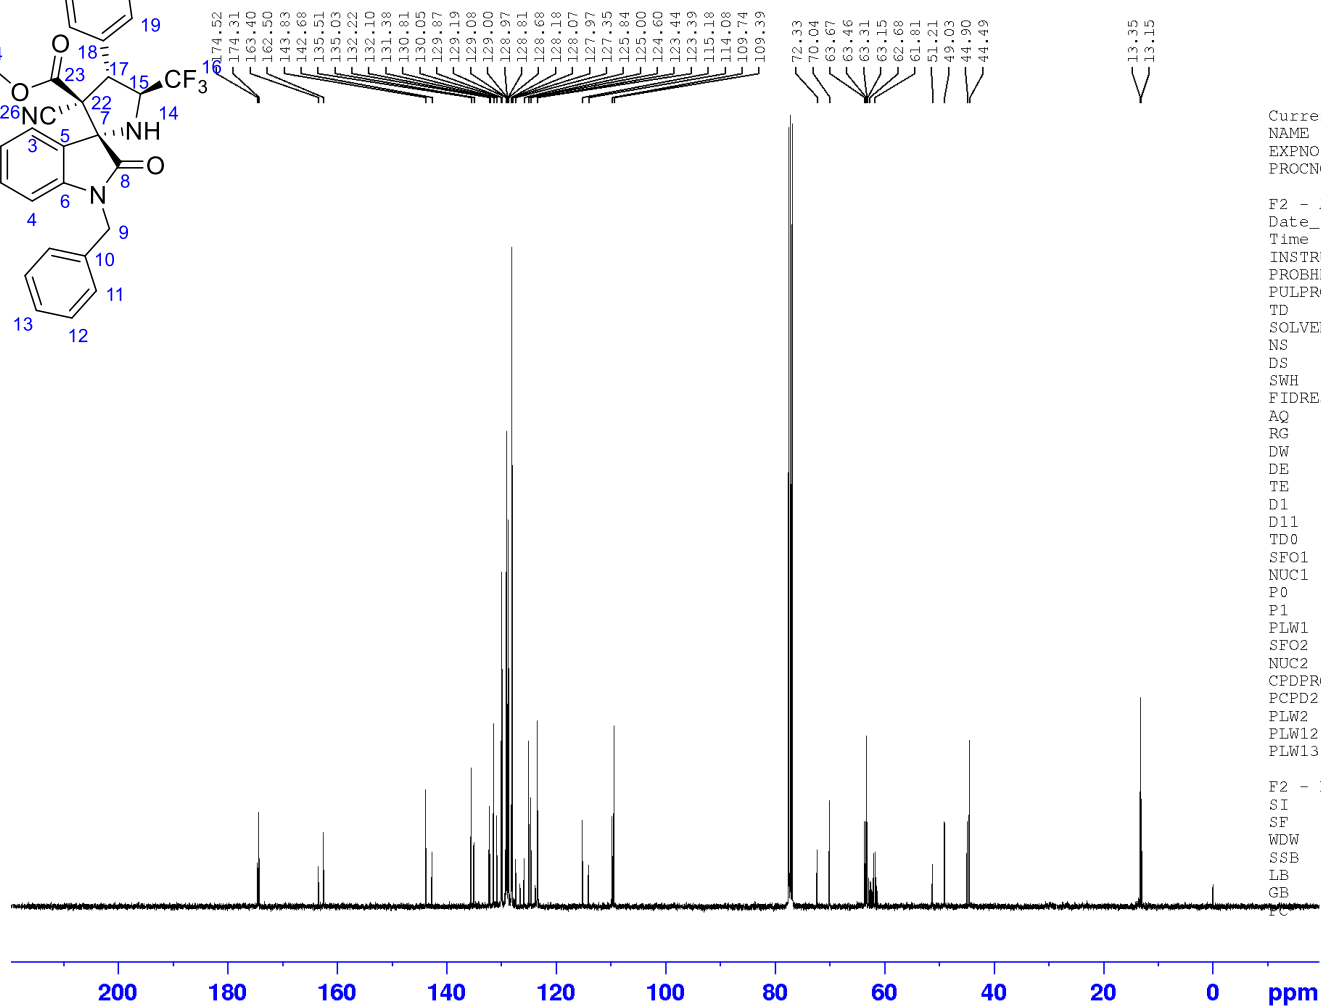

Current Data Parameters  
NAME WR 2.170  
EXPNO 41  
PROCNO 1

F2 - Acquisition Parameters  
Date\_ 20210714  
Time 20.05 h  
INSTRUM AVIII\_400  
PROBHD Z108618\_0146 (  
PULPROG zgpg30  
TD 96150  
SOLVENT CDCl3  
NS 2048  
DS 4  
SWH 24038.461 Hz  
FIDRES 0.500020 Hz  
AQ 1.9999200 sec  
RG 2050  
DW 20.800 usec  
DE 6.50 usec  
TE 300.0 K  
D1 1.0000000 sec  
D11 0.0300000 sec  
TD0 1  
SFO1 100.6178003 MHz  
NUC1 13C  
P0 3.00 usec  
P1 9.00 usec  
PLW1 96.68000031 W  
SFO2 400.1116004 MHz  
NUC2 1H  
CPDPRG2 waltz64  
PCPD2 90.00 usec  
PLW2 17.29199982 W  
PLW12 0.48032999 W  
PLW13 0.24160001 W

F2 - Processing parameters  
SI 131072  
SF 100.6077287 MHz  
WDW EM  
SSB 0  
LB 1.00 Hz  
GB 0  
PC 1.40

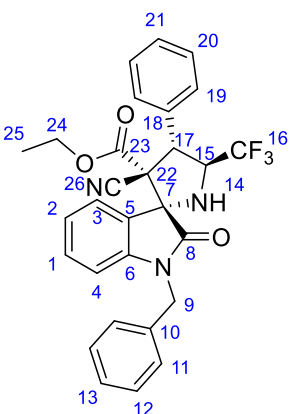

3I  
 Both diastereomers  
<sup>19</sup>F NMR  
 376 MHz  
 CDCl<sub>3</sub>

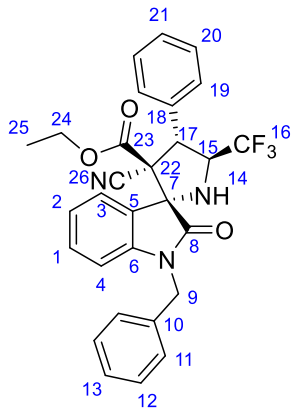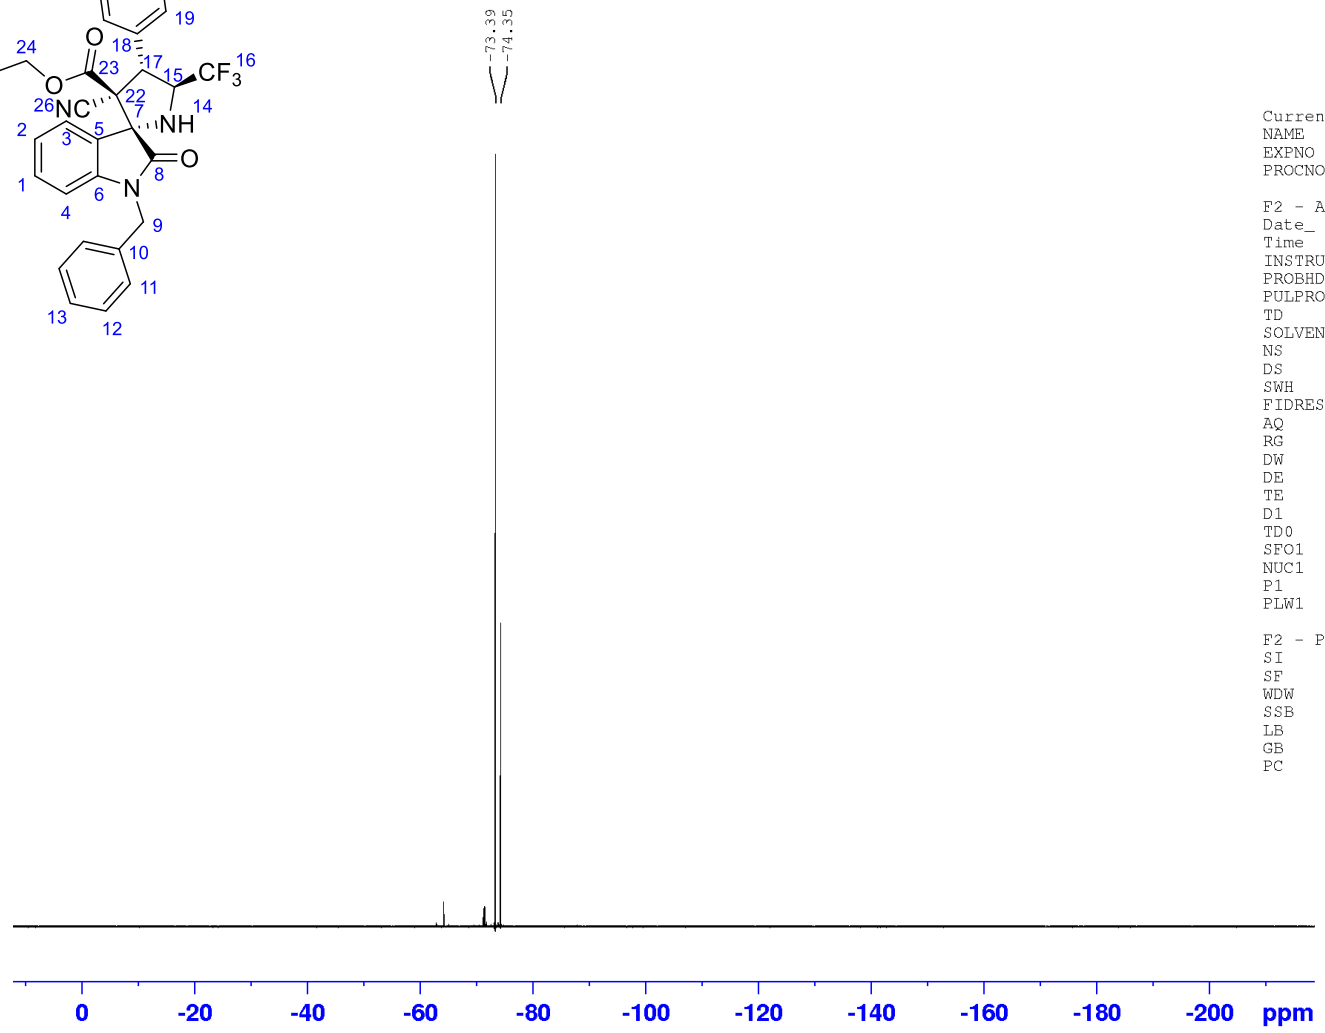

```

Current Data Parameters
NAME          WR 2.170
EXPNO         31
PROCNO        1

F2 - Acquisition Parameters
Date_         20210702
Time          16.53 h
INSTRUM       AVIII_400
PROBHD        Z108618_0146 (
PULPROG       zg
TD            261992
SOLVENT       CDCl3
NS            16
DS            4
SWH           89285.711 Hz
FIDRES        0.681591 Hz
AQ            1.4671552 sec
RG            575
DW            5.600 usec
DE            7.11 usec
TE            300.0 K
D1            1.00000000 sec
TD0           1
SFO1          376.4418995 MHz
NUC1          19F
P1            11.80 usec
PLW1          32.96500015 W

F2 - Processing parameters
SI            262144
SF            376.4795470 MHz
WDW           EM
SSB           0
LB            0.30 Hz
GB            0
PC            1.00
  
```

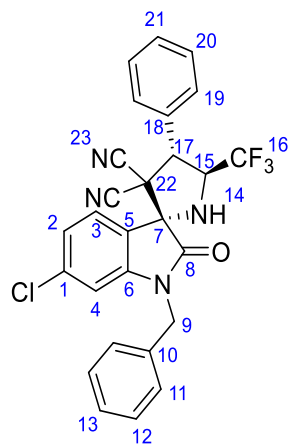

3m

Peaks picked for major diastereomer

<sup>1</sup>H NMR

600 MHz

---

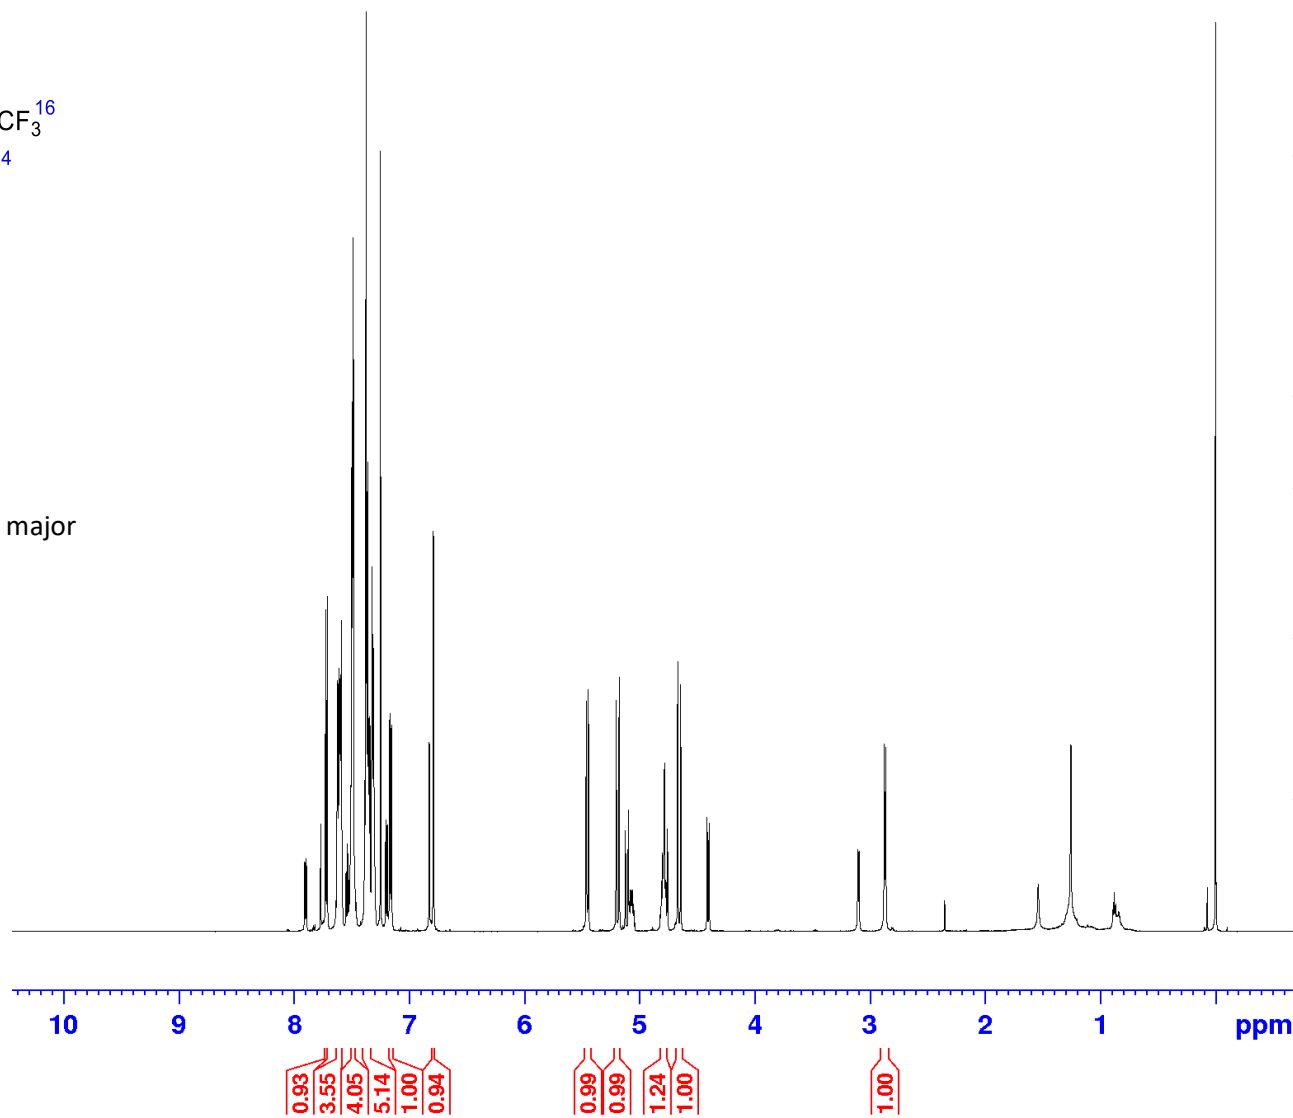

Current Data Parameters  
 NAME WR 2.226 (600)  
 EXPNO 10  
 PROCNO 1

F2 - Acquisition Parameters  
 Date\_ 20211005  
 Time 15.20 h  
 INSTRUM spect  
 PROBHD Z114607\_0188 (  
 PULPROG zg30  
 TD 65536  
 SOLVENT CDC13  
 NS 16  
 DS 2  
 SWH 12019.230 Hz  
 FIDRES 0.366798 Hz  
 AQ 2.7262976 sec  
 RG 97.5  
 DW 41.600 usec  
 DE 12.10 usec  
 TE 300.0 K  
 D1 1.00000000 sec  
 TD0 1  
 SFO1 600.1337058 MHz  
 NUC1 1H  
 P0 3.33 usec  
 P1 10.00 usec  
 PLW1 26.60000038 W

F2 - Processing parameters  
 SI 65536  
 SF 600.1300170 MHz  
 WDW EM  
 SSB 0  
 LB 0.30 Hz  
 GB 0  
 PC 1.00

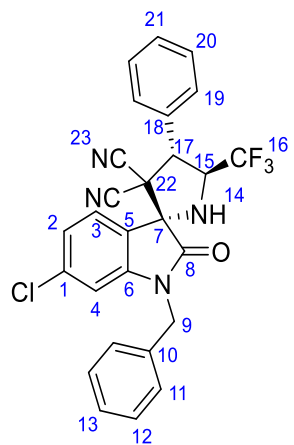

3m

Peaks picked for minor diastereomer

<sup>1</sup>H NMR

600 MHz

---

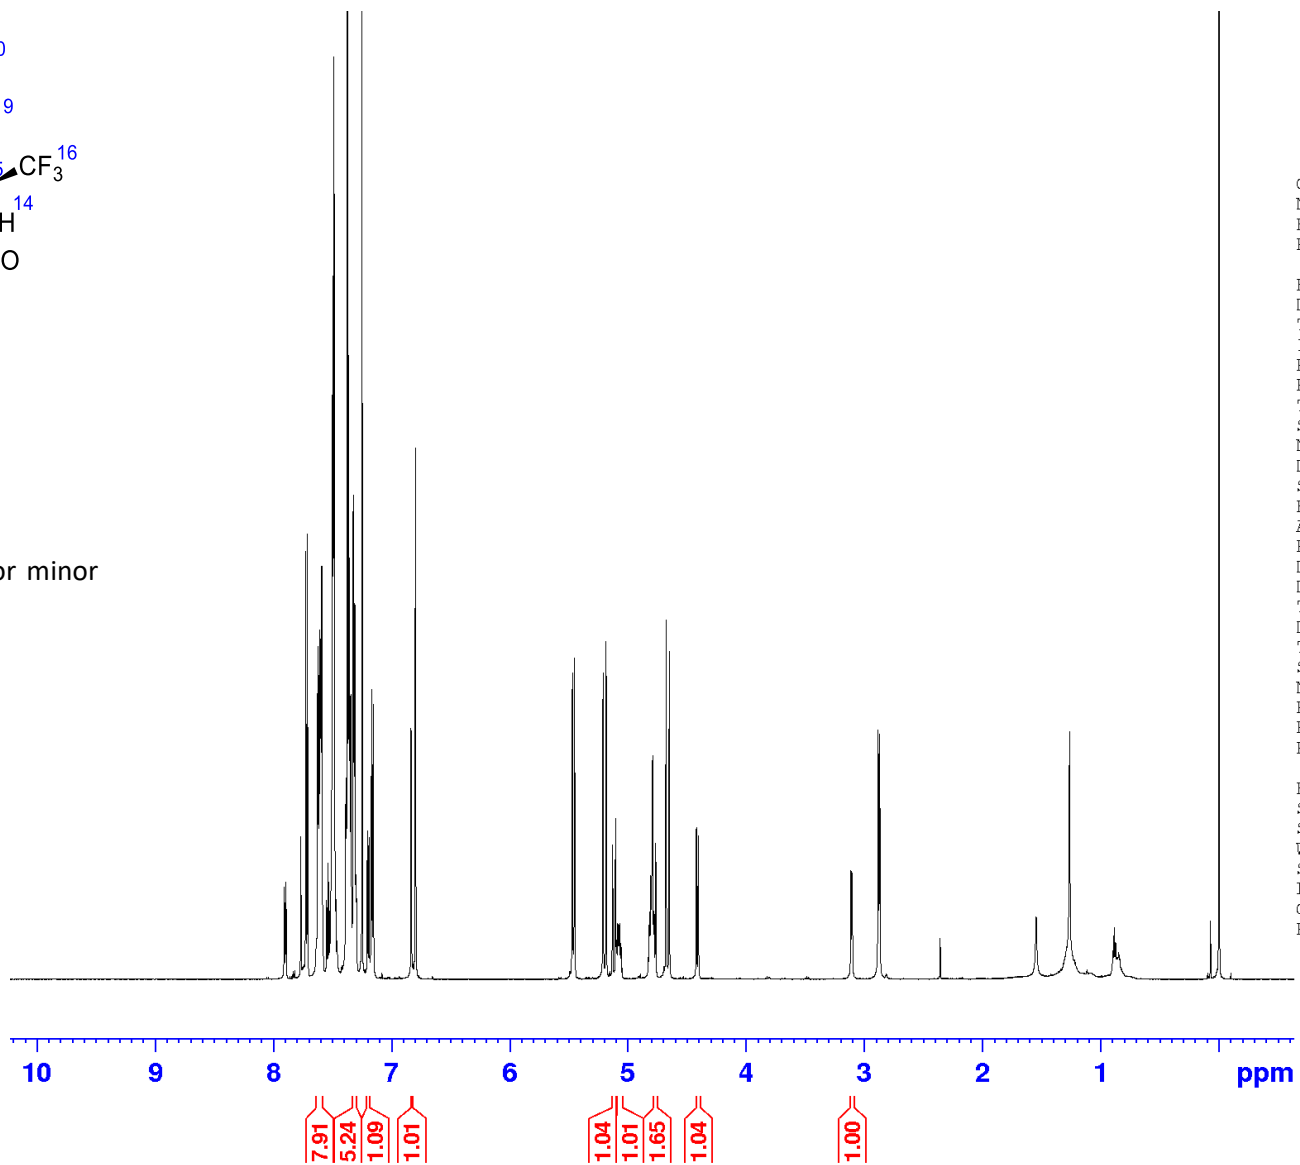

Current Data Parameters  
 NAME WR 2.226 (600)  
 EXPNO 30  
 PROCNO 1

F2 - Acquisition Parameters  
 Date\_ 20211005  
 Time 15.20 h  
 INSTRUM spect  
 PROBHD Z114607\_0188 (  
 PULPROG zg30  
 TD 65536  
 SOLVENT CDCl3  
 NS 16  
 DS 2  
 SWH 12019.230 Hz  
 FIDRES 0.366798 Hz  
 AQ 2.7262976 sec  
 RG 97.5  
 DW 41.600 usec  
 DE 12.10 usec  
 TE 300.0 K  
 D1 1.00000000 sec  
 TD0 1  
 SFO1 600.1337058 MHz  
 NUC1 1H  
 P0 3.33 usec  
 P1 10.00 usec  
 PLW1 26.60000038 W

F2 - Processing parameters  
 SI 65536  
 SF 600.1300170 MHz  
 WDW EM  
 SSB 0  
 LB 0.30 Hz  
 GB 0  
 PC 1.00



3m

Both diastereomers

<sup>13</sup>C NMR

151 MHz

CDCl<sub>3</sub>

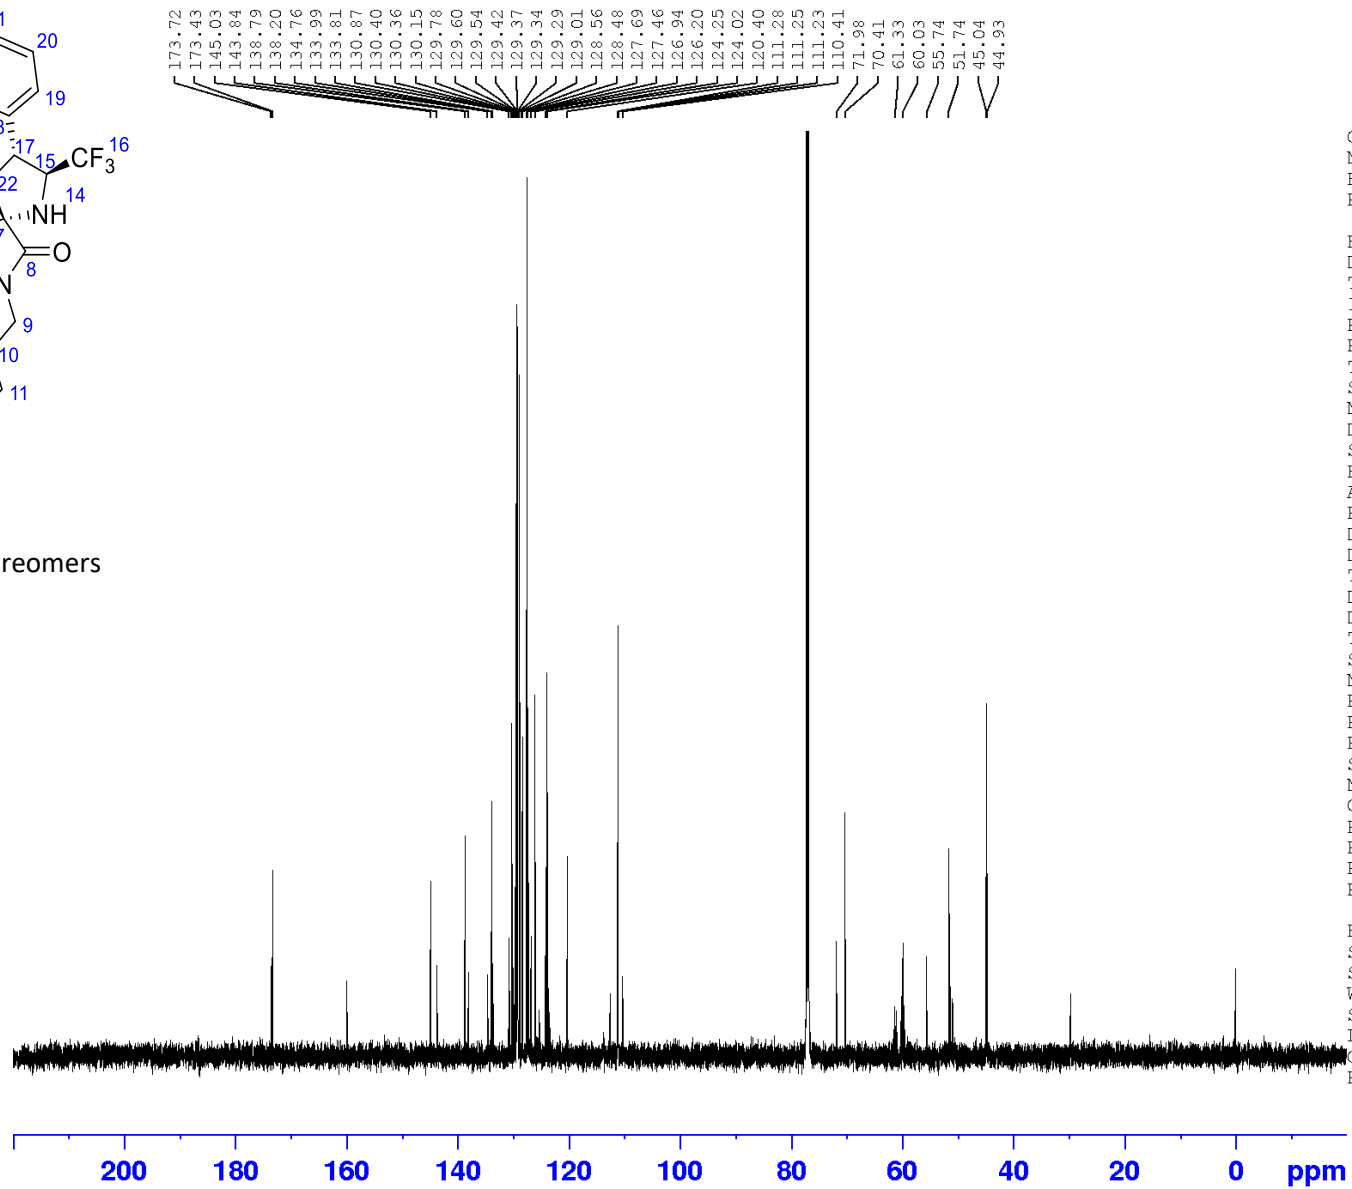

Current Data Parameters  
NAME WR 2.226 (600)  
EXPNO 20  
PROCNO 1

F2 - Acquisition Parameters  
Date\_ 20211006  
Time 20.43 h  
INSTRUM spect  
PROBHD Z114607\_0188 (3  
PULPROG zgpg30  
TD 65536  
SOLVENT CDCl3  
NS 1024  
DS 4  
SWH 36231.883 Hz  
FIDRES 1.105709 Hz  
AQ 0.9043968 sec  
RG 186.92  
DW 13.800 usec  
DE 6.50 usec  
TE 300.0 K  
D1 2.00000000 sec  
D11 0.03000000 sec  
TD0 1  
SFO1 150.9178988 MHz  
NUC1 13C  
P0 3.93 usec  
P1 11.80 usec  
PLW1 85.00000000 W  
SFO2 600.1324005 MHz  
NUC2 1H  
CPDPRG[2] waltz65  
PCPD2 70.00 usec  
PLW2 27.00000000 W  
PLW12 0.57327998 W  
PLW13 0.28836000 W

F2 - Processing parameters  
SI 32768  
SF 150.9027894 MHz  
WDW EM  
SSB 0  
LB 1.00 Hz  
GB 0  
PC 1.40



3m

Both diastereomers

<sup>19</sup>F NMR

564 MHz

CDCl<sub>3</sub>

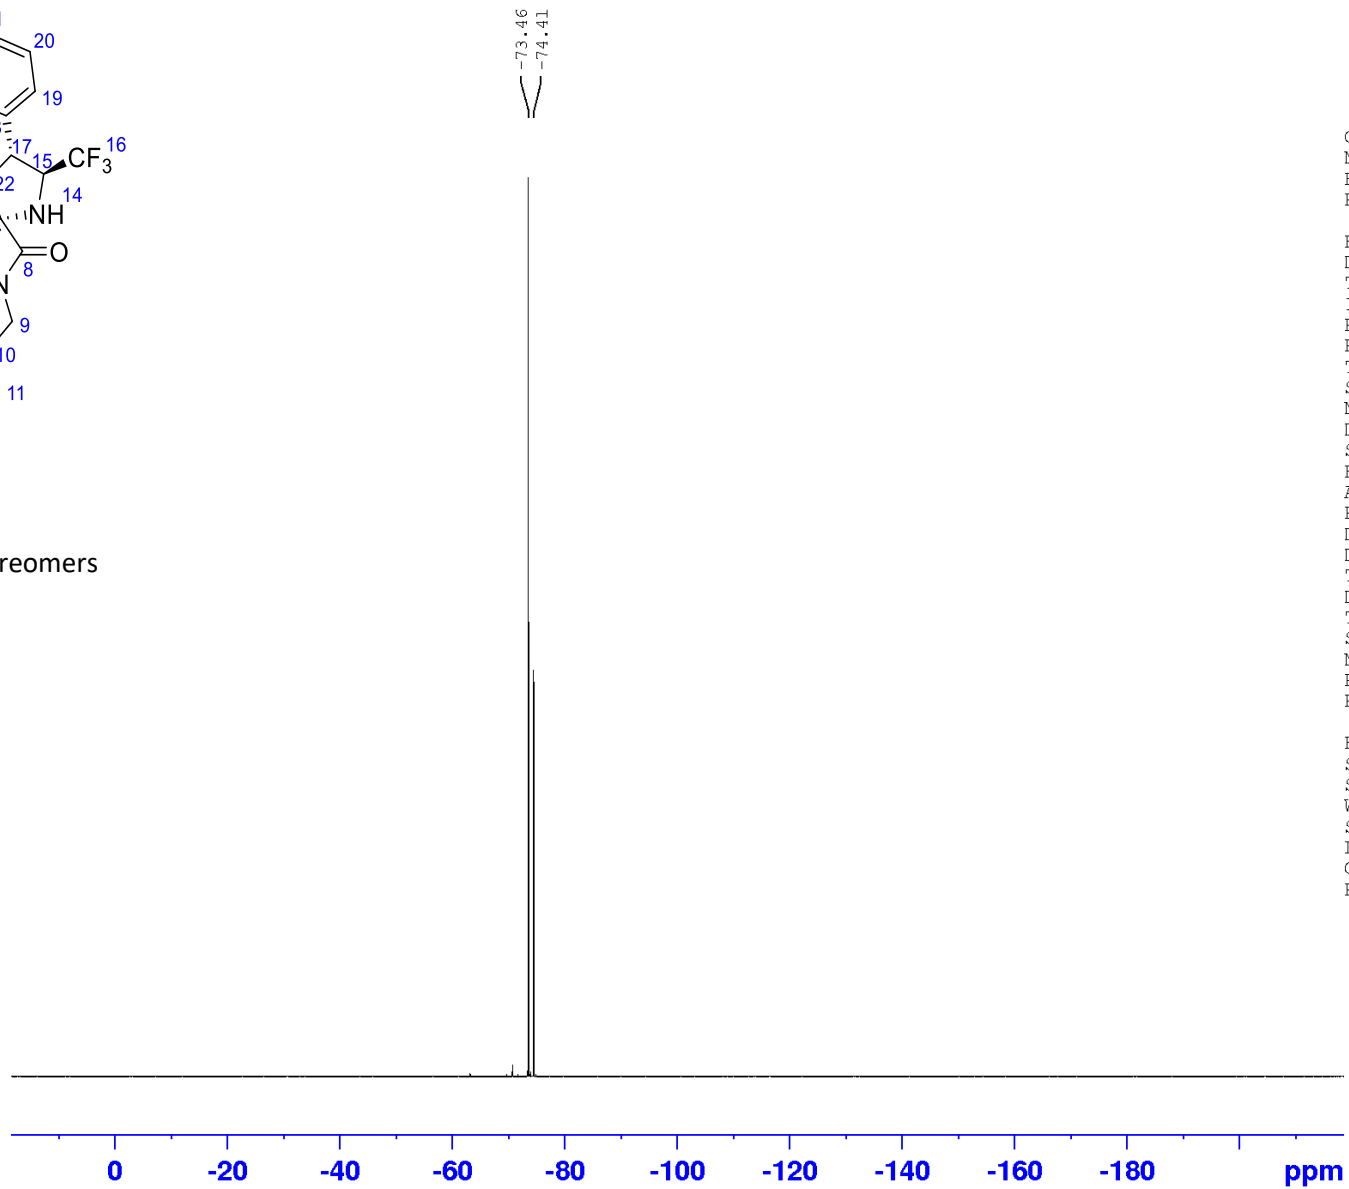

Current Data Parameters  
 NAME WR 2.226 (600)  
 EXPNO 18  
 PROCNO 1

F2 - Acquisition Parameters  
 Date\_ 20211005  
 Time 17.29 h  
 INSTRUM spect  
 PROBHD Z114607\_0188 (  
 PULPROG zgfglqn  
 TD 261896  
 SOLVENT CDCl3  
 NS 16  
 DS 4  
 SWH 133928.578 Hz  
 FIDRES 1.022761 Hz  
 AQ 0.9777451 sec  
 RG 186.92  
 DW 3.733 usec  
 DE 6.70 usec  
 TE 300.0 K  
 D1 4.0000000 sec  
 TD0 1  
 SFO1 564.6299217 MHz  
 NUC1 19F  
 P1 12.00 usec  
 PLW1 49.0000000 W

F2 - Processing parameters  
 SI 262144  
 SF 564.6863882 MHz  
 WDW EM  
 SSB 0  
 LB 0.50 Hz  
 GB 0  
 PC 2.00

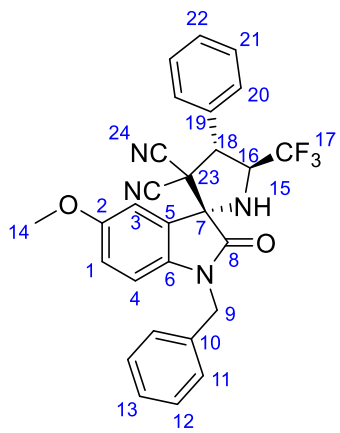

3n

Major diastereomer

<sup>1</sup>H NMR

600 MHz

CDCl<sub>3</sub>

Current Data Parameters  
 NAME WR 2.231 (600)  
 EXPNO 10  
 PROCNO 1

F2 - Acquisition Parameters  
 Date\_ 20211014  
 Time 12.56 h  
 INSTRUM spect  
 PROBHD Z114607\_0188 (  
 PULPROG zg30  
 TD 65536  
 SOLVENT CDC13  
 NS 16  
 DS 2  
 SWH 12019.230 Hz  
 FIDRES 0.366798 Hz  
 AQ 2.7262976 sec  
 RG 74.91  
 DW 41.600 usec  
 DE 12.10 usec  
 TE 297.6 K  
 D1 1.00000000 sec  
 TD0 1  
 SFO1 600.1337058 MHz  
 NUC1 1H  
 P0 3.33 usec  
 P1 10.00 usec  
 PLW1 26.60000038 W

F2 - Processing parameters  
 SI 65536  
 SF 600.1300144 MHz  
 WDW EM  
 SSB 0  
 LB 0.30 Hz  
 GB 0  
 PC 1.00

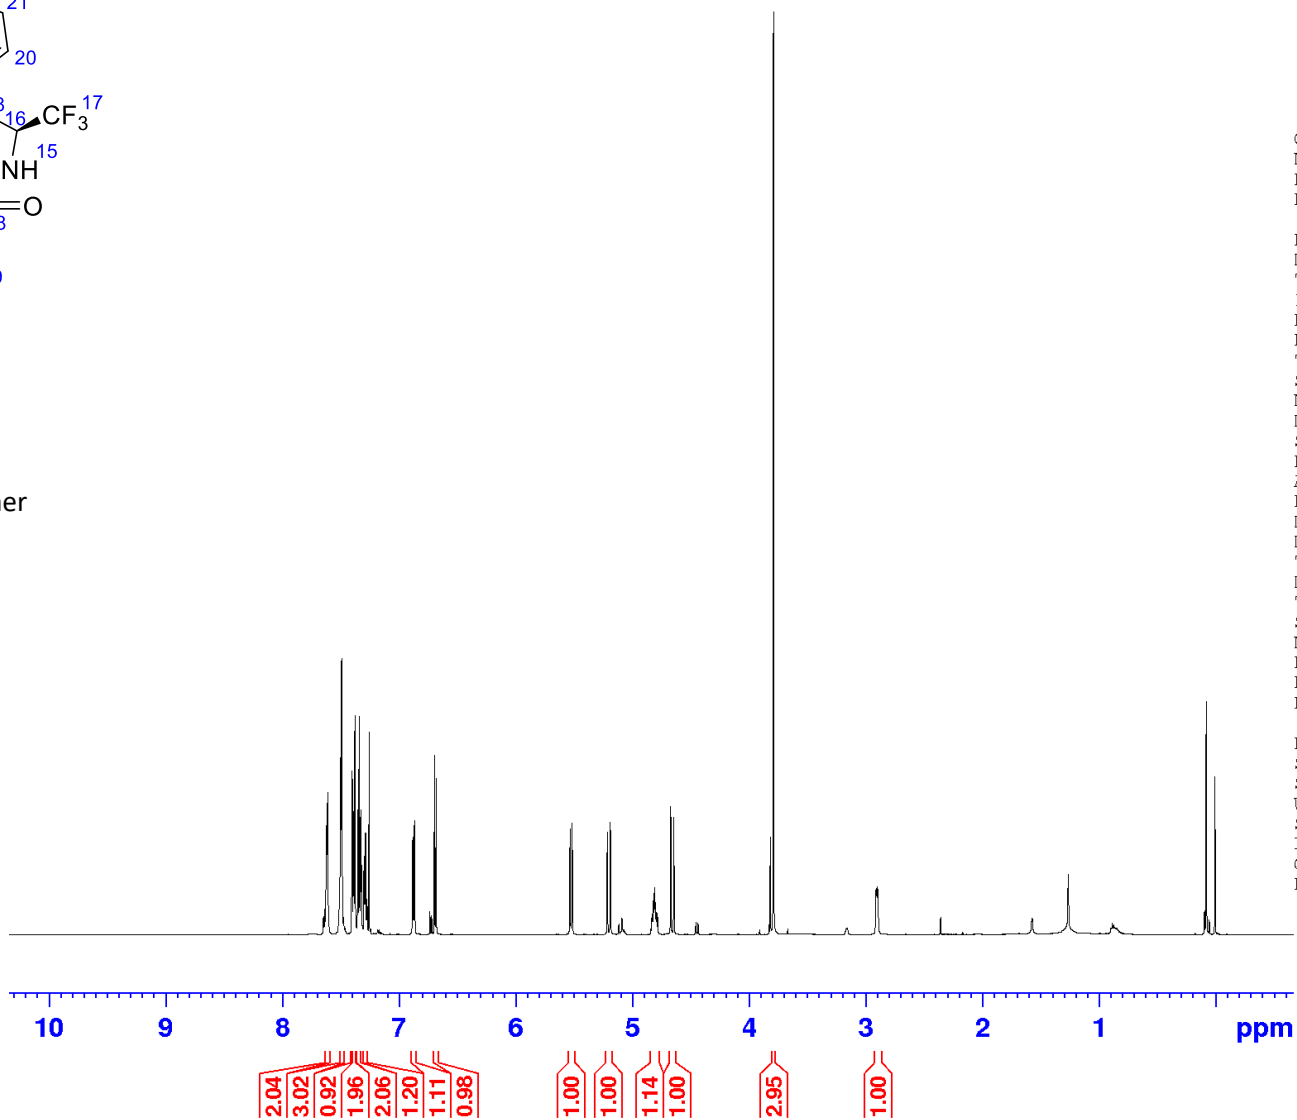



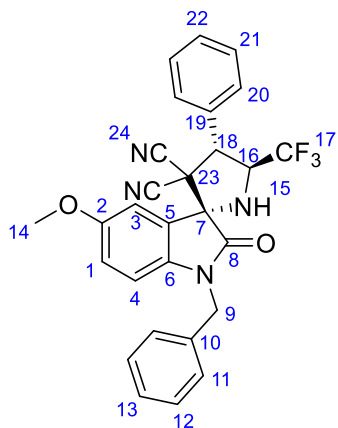

3n

Major diastereomer

<sup>13</sup>C NMR

151 MHz

CDCl<sub>3</sub>

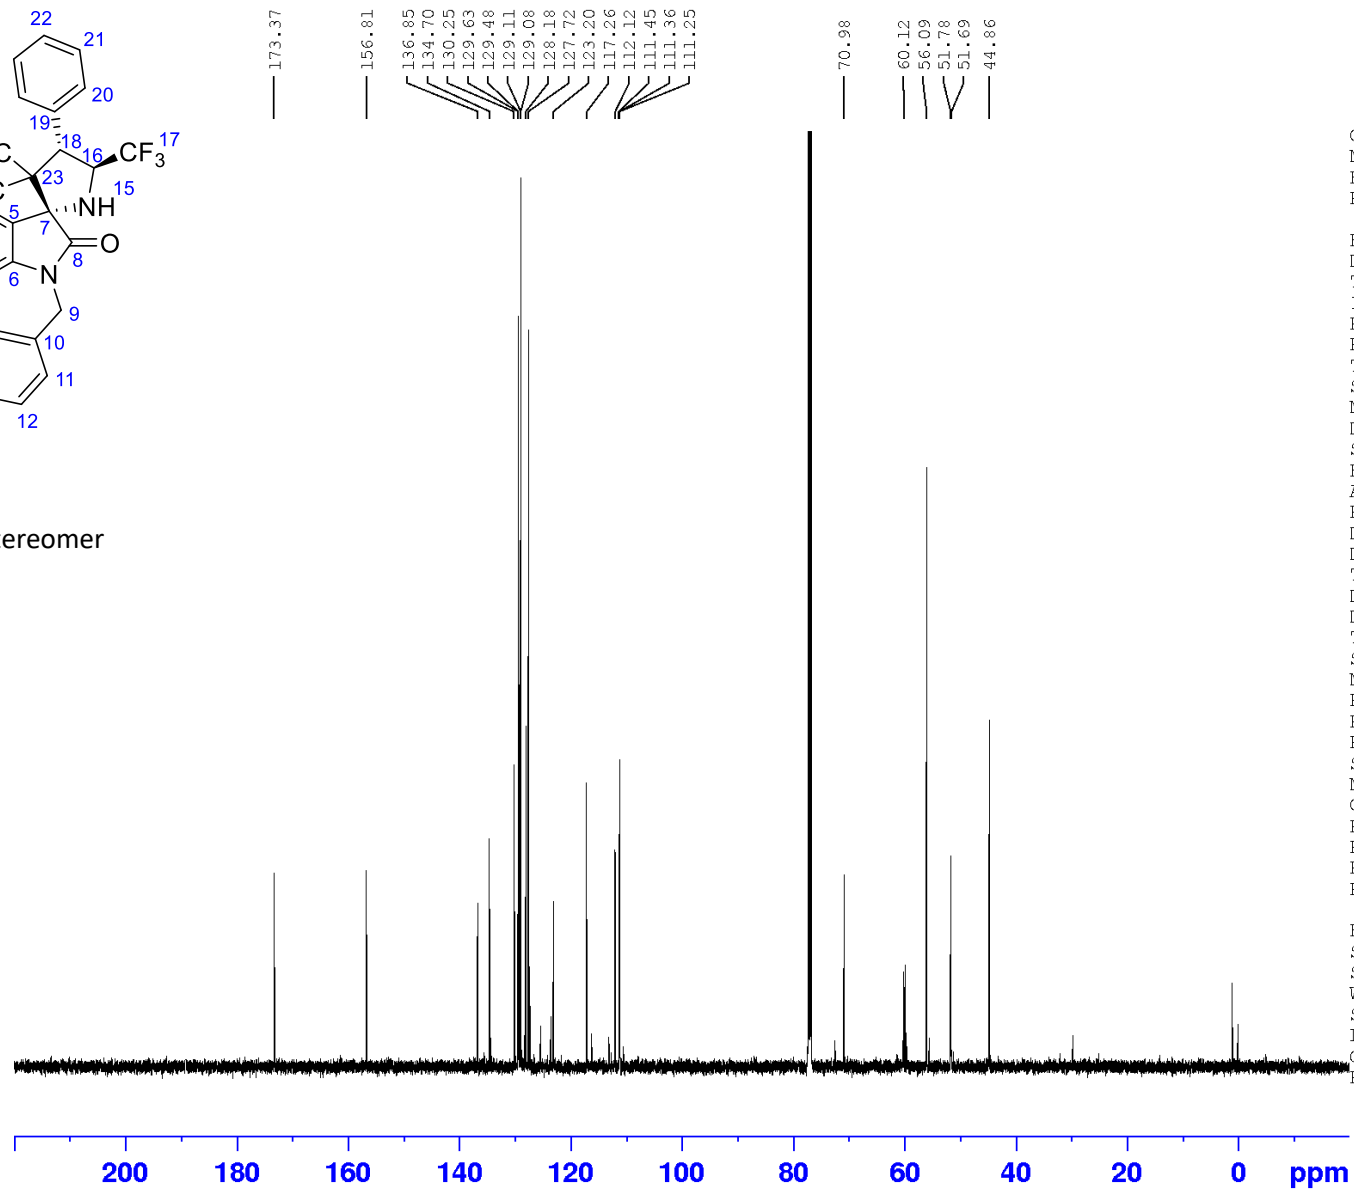

Current Data Parameters  
 NAME WR 2.231 (600)  
 EXPNO 11  
 PROCNO 1

F2 - Acquisition Parameters  
 Date\_ 20211014  
 Time 13.48 h  
 INSTRUM spect  
 PROBHD Z114607\_0188 (  
 PULPROG zgpg30  
 TD 65536  
 SOLVENT CDCl3  
 NS 1024  
 DS 4  
 SWH 36231.883 Hz  
 FIDRES 1.105709 Hz  
 AQ 0.9043968 sec  
 RG 186.92  
 DW 13.800 usec  
 DE 6.50 usec  
 TE 299.5 K  
 D1 2.00000000 sec  
 D11 0.03000000 sec  
 TD0 1  
 SFO1 150.9178988 MHz  
 NUC1 13C  
 P0 3.93 usec  
 P1 11.80 usec  
 PLW1 85.00000000 W  
 SFO2 600.1324005 MHz  
 NUC2 1H  
 CPDPRG[2] waltz65  
 PCPD2 70.00 usec  
 PLW2 27.00000000 W  
 PLW12 0.57327998 W  
 PLW13 0.28836000 W

F2 - Processing parameters  
 SI 32768  
 SF 150.9027877 MHz  
 WDW EM  
 SSB 0  
 LB 1.00 Hz  
 GB 0  
 PC 1.40

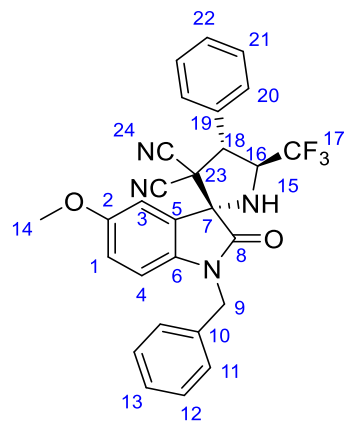

3n

Major diastereomer

<sup>19</sup>F NMR

564 MHz

CDCl<sub>3</sub>

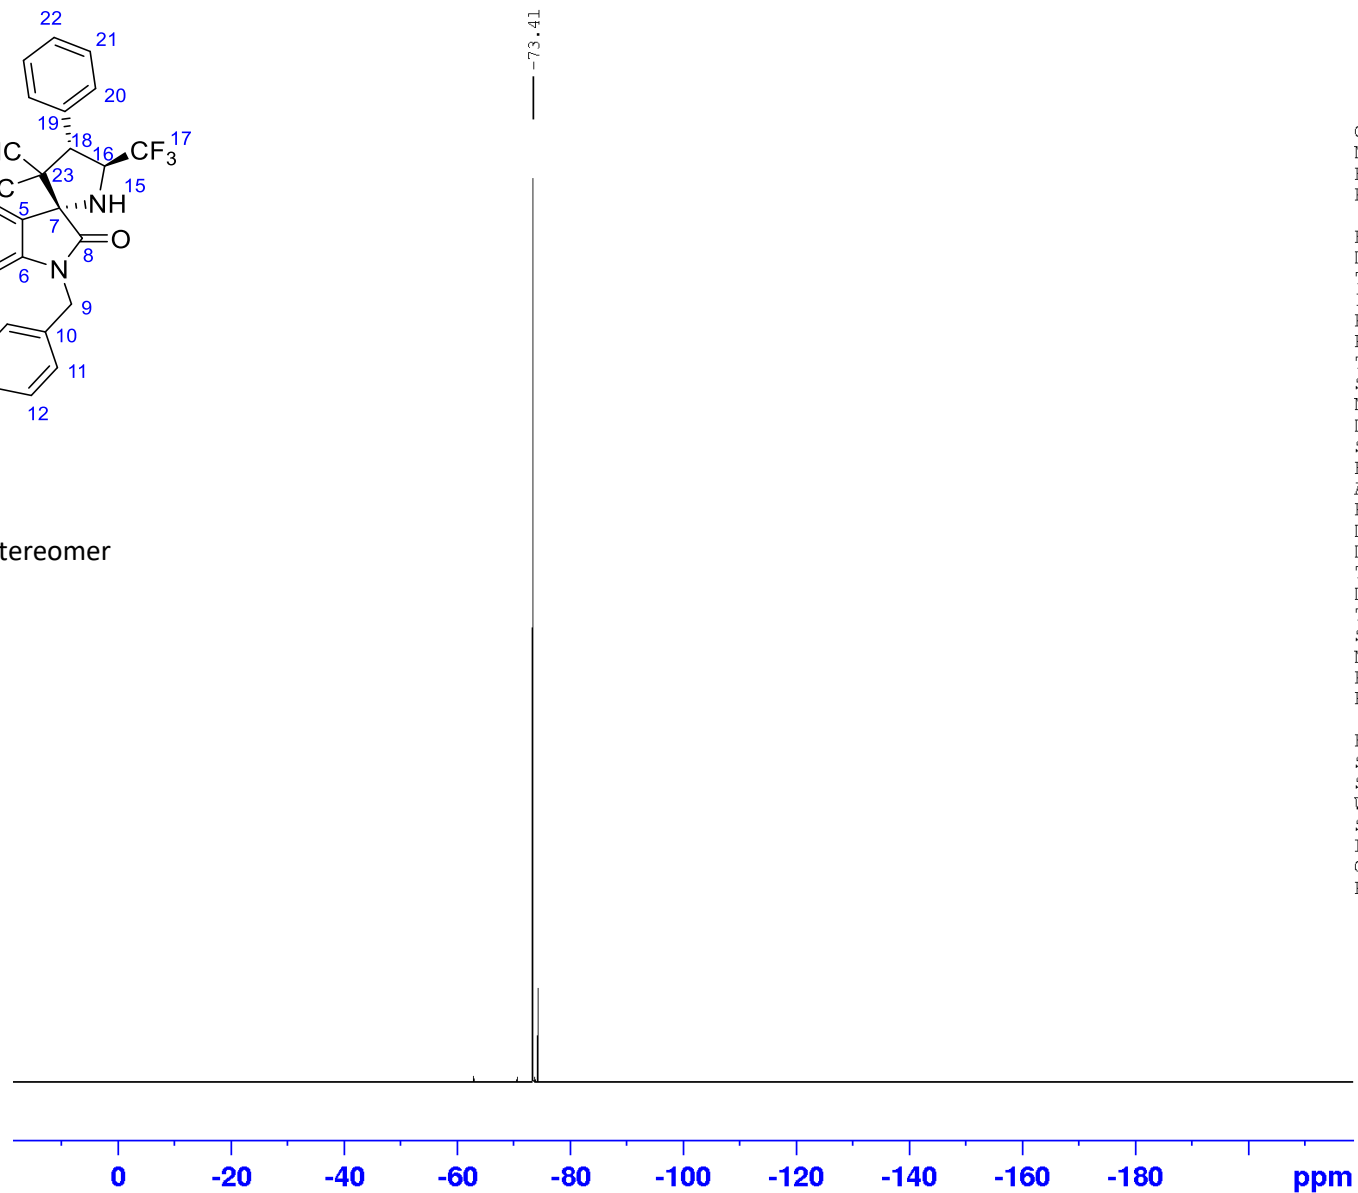

Current Data Parameters

NAME WR 2.231 (600)  
 EXPNO 17  
 PROCNO 1

F2 - Acquisition Parameters

Date\_ 20211014  
 Time 15.33 h  
 INSTRUM spect  
 PROBHD Z114607\_0188 (  
 PULPROG zgflqn  
 TD 261896  
 SOLVENT CDCl3  
 NS 16  
 DS 4  
 SWH 133928.578 Hz  
 FIDRES 1.022761 Hz  
 AQ 0.9777451 sec  
 RG 186.92  
 DW 3.733 usec  
 DE 6.70 usec  
 TE 297.7 K  
 D1 4.00000000 sec  
 TD0 1  
 SFO1 564.6299217 MHz  
 NUC1 19F  
 P1 12.00 usec  
 PLW1 49.00000000 W

F2 - Processing parameters

SI 262144  
 SF 564.6863882 MHz  
 WDW EM  
 SSB 0  
 LB 0.50 Hz  
 GB 0  
 PC 2.00

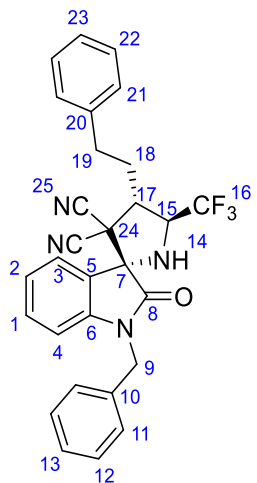

30

Major diastereomer

<sup>1</sup>H NMR

600 MHz

CDCl<sub>3</sub>

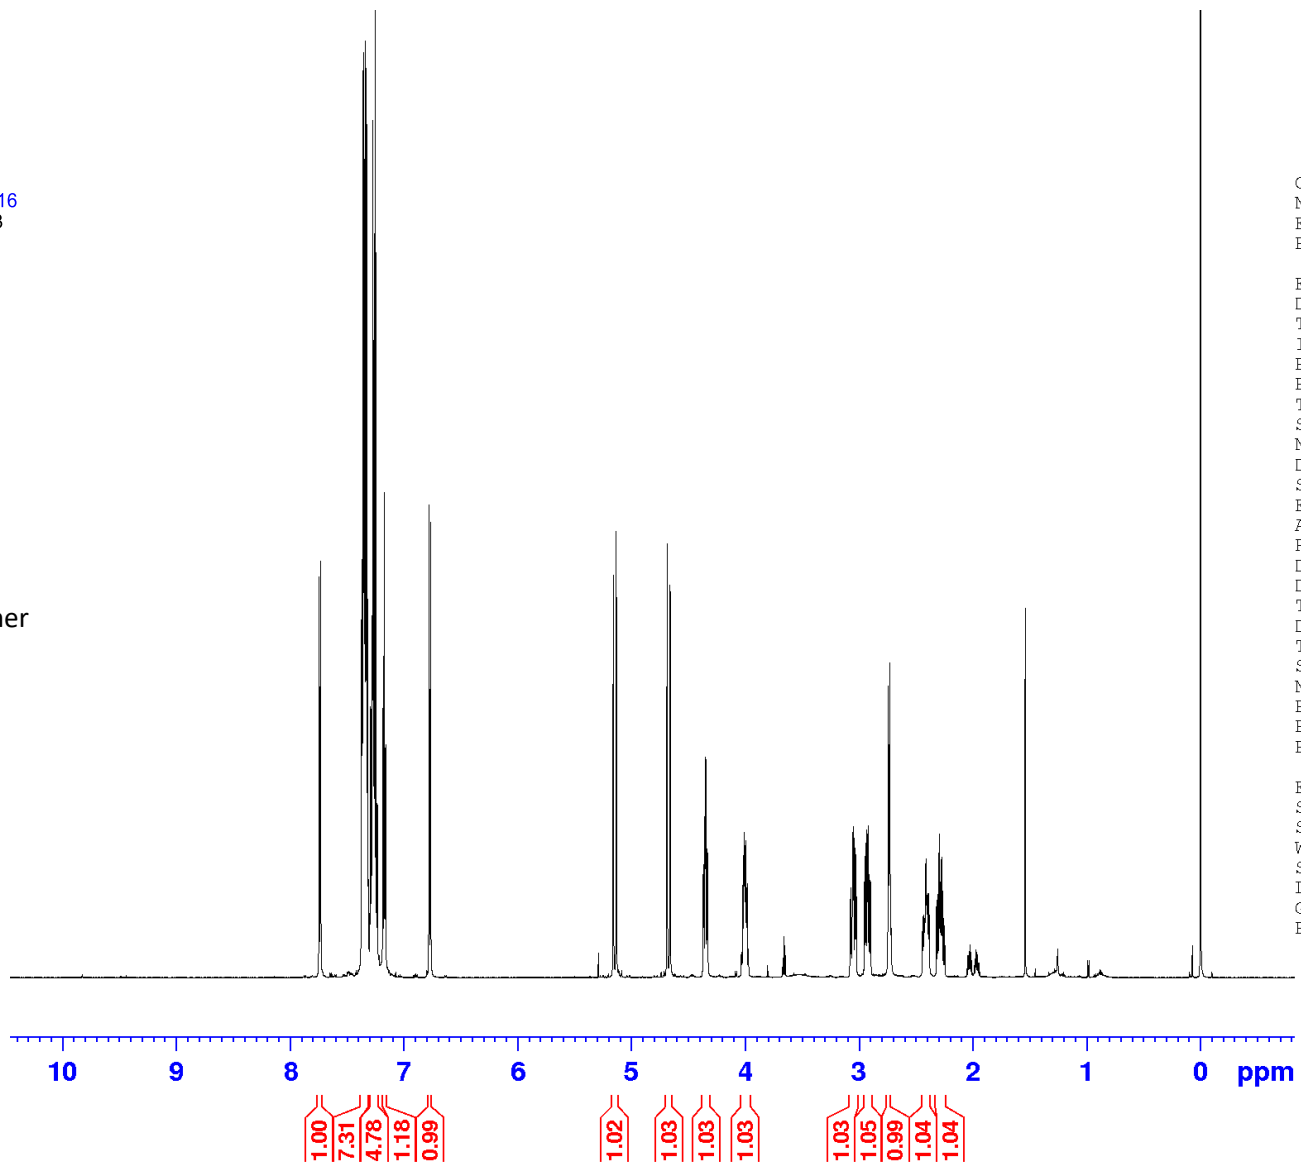

Current Data Parameters  
 NAME WR 2.227 (600)  
 EXPNO 20  
 PROCNO 1

F2 - Acquisition Parameters  
 Date\_ 20211014  
 Time 12.51 h  
 INSTRUM spect  
 PROBHD Z114607\_0188 (  
 PULPROG zg30  
 TD 65536  
 SOLVENT CDC13  
 NS 16  
 DS 2  
 SWH 12019.230 Hz  
 FIDRES 0.366798 Hz  
 AQ 2.7262976 sec  
 RG 97.5  
 DW 41.600 usec  
 DE 12.10 usec  
 TE 297.6 K  
 D1 1.00000000 sec  
 TD0 1  
 SFO1 600.1337058 MHz  
 NUC1 1H  
 P0 3.33 usec  
 P1 10.00 usec  
 PLW1 26.60000038 W

F2 - Processing parameters  
 SI 65536  
 SF 600.1300183 MHz  
 WDW EM  
 SSB 0  
 LB 0.30 Hz  
 GB 0  
 PC 1.00

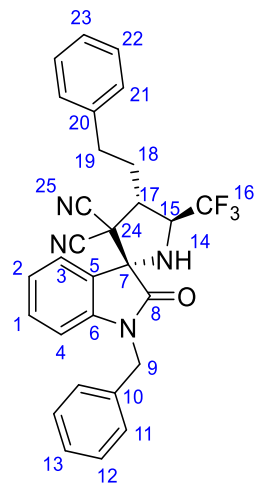

30

Major diastereomer

<sup>13</sup>C NMR

151 MHz

CDCl<sub>3</sub>

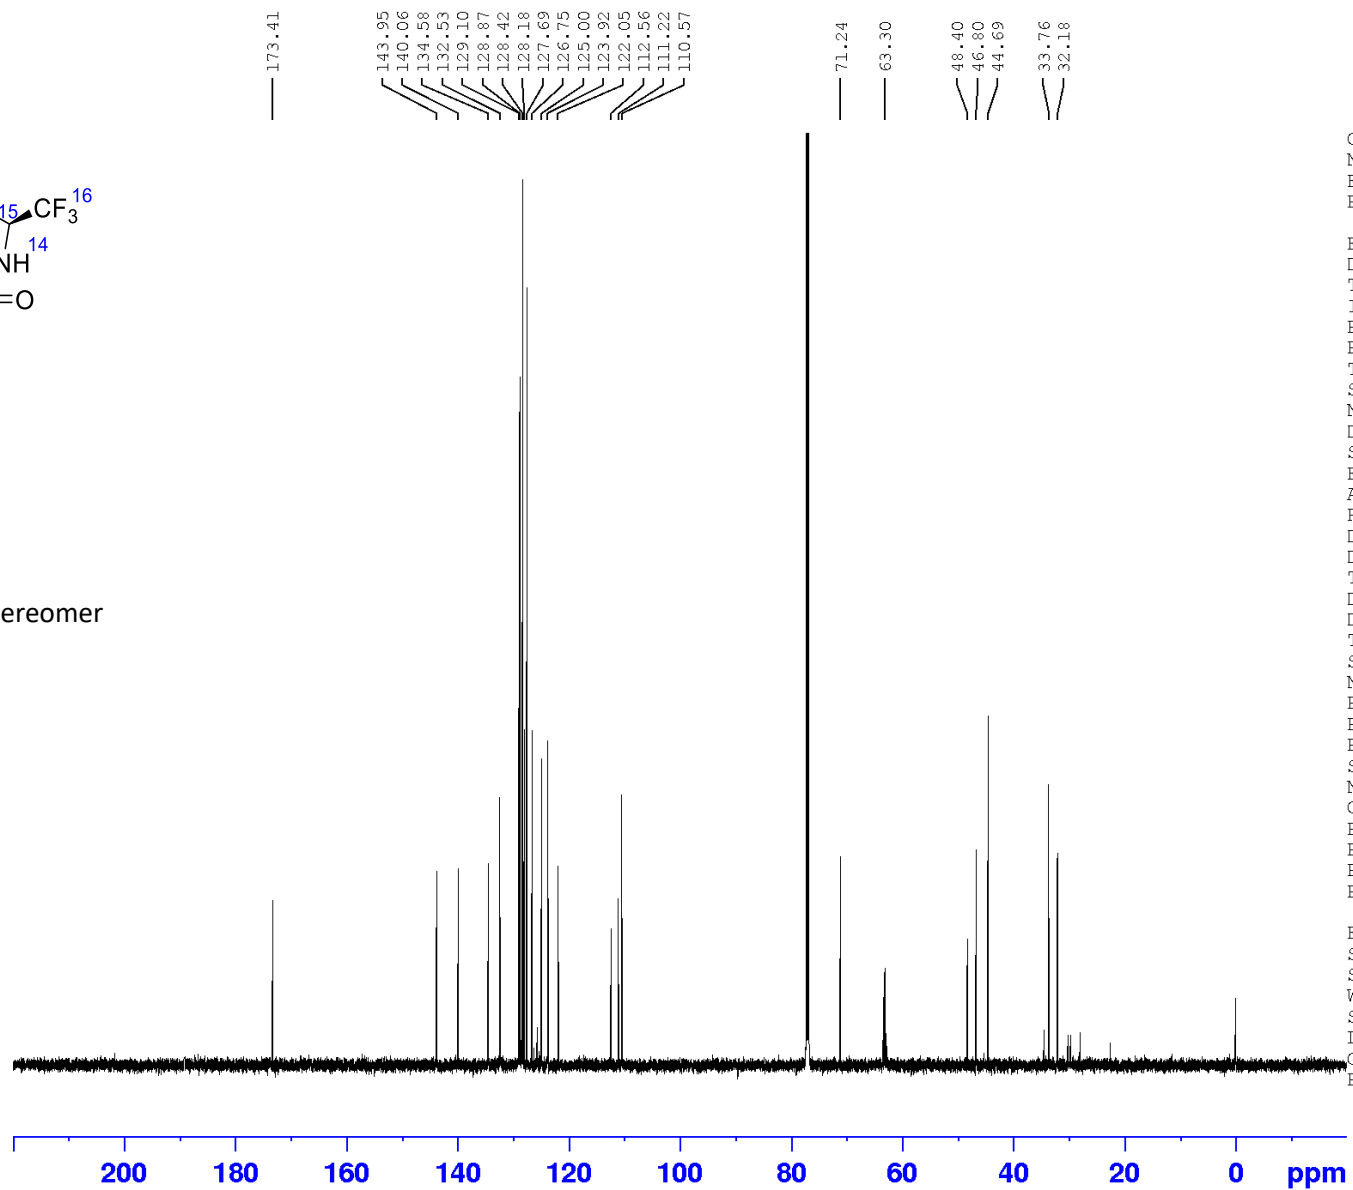

Current Data Parameters  
 NAME WR 2.227 (600)  
 EXPNO 11  
 PROCNO 1

F2 - Acquisition Parameters  
 Date\_ 20211006  
 Time 17.38 h  
 INSTRUM spect  
 PROBHD Z114607\_0188 (  
 PULPROG zgpg30  
 TD 65536  
 SOLVENT CDCl3  
 NS 1024  
 DS 4  
 SWH 36231.883 Hz  
 FIDRES 1.105709 Hz  
 AQ 0.9043968 sec  
 RG 186.92  
 DW 13.800 usec  
 DE 6.50 usec  
 TE 300.0 K  
 D1 2.00000000 sec  
 D11 0.03000000 sec  
 TD0 1  
 SFO1 150.9178988 MHz  
 NUC1 13C  
 P0 3.93 usec  
 P1 11.80 usec  
 PLW1 85.00000000 W  
 SFO2 600.1324005 MHz  
 NUC2 1H  
 CPDPRG[2] waltz65  
 PCPD2 70.00 usec  
 PLW2 27.00000000 W  
 PLW12 0.57327998 W  
 PLW13 0.28836000 W

F2 - Processing parameters  
 SI 32768  
 SF 150.9027895 MHz  
 WDW EM  
 SSB 0  
 LB 1.00 Hz  
 GB 0  
 PC 1.40



30

Major diastereomer

<sup>19</sup>F NMR

564 MHz

CDCl<sub>3</sub>

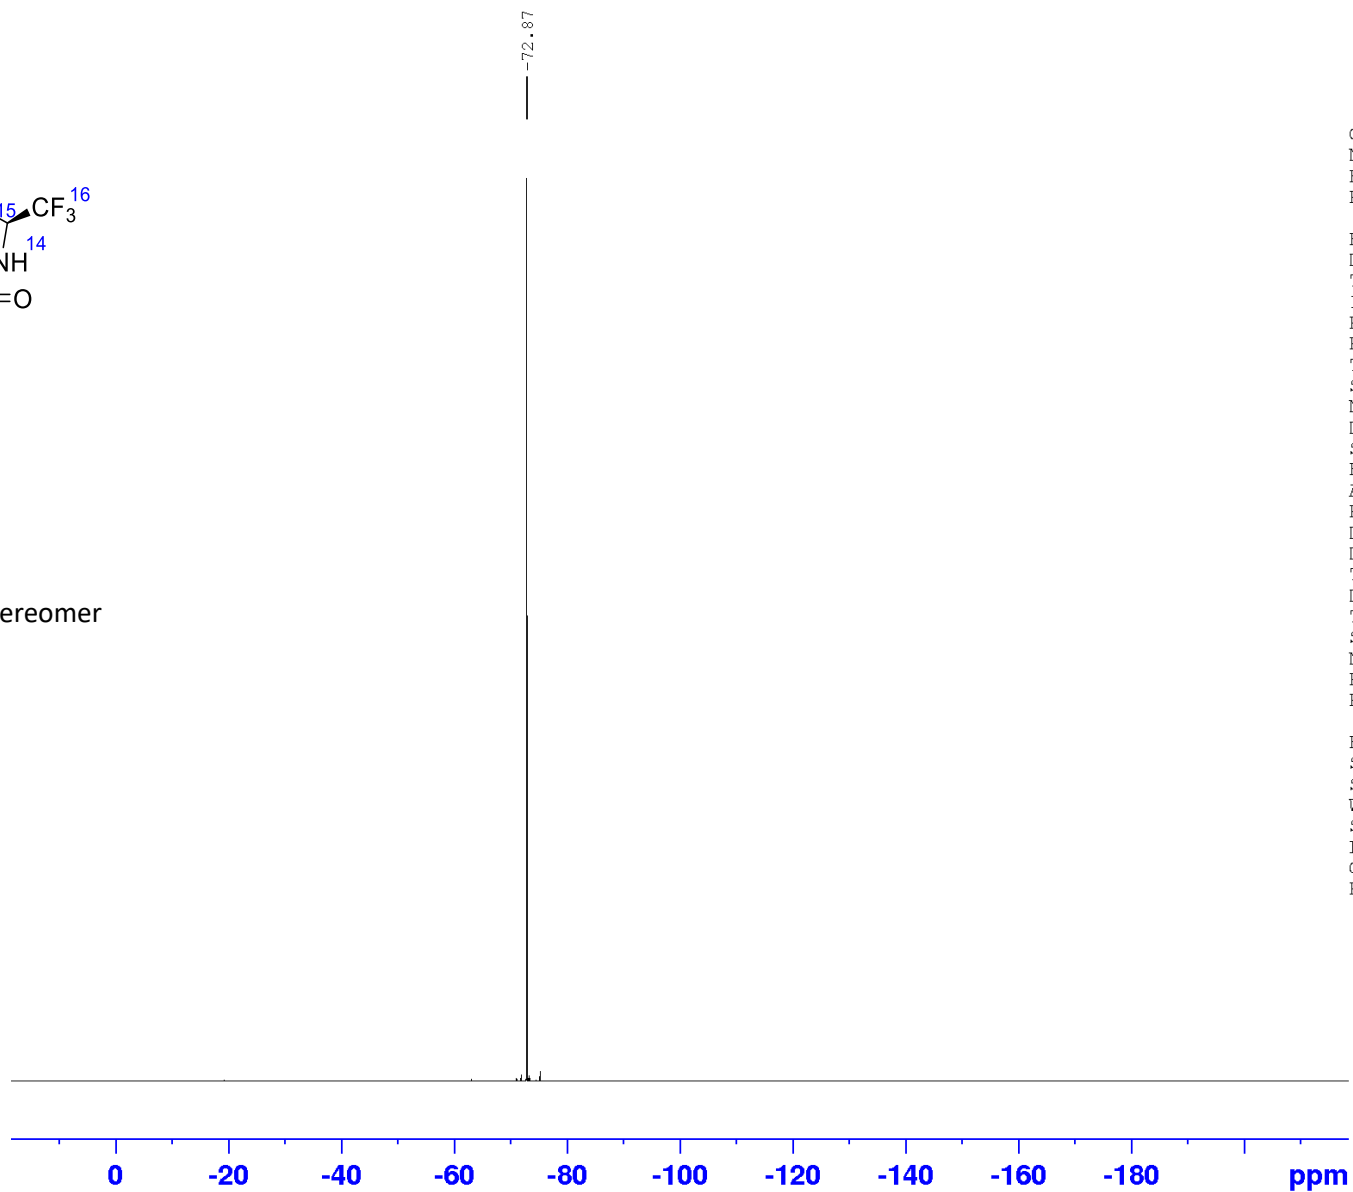

Current Data Parameters  
 NAME WR 2.227 (600)  
 EXPNO 17  
 PROCNO 1

F2 - Acquisition Parameters  
 Date\_ 20211006  
 Time 19.41 h  
 INSTRUM spect  
 PROBHD Z114607\_0188 (  
 PULPROG zgflqn  
 TD 261896  
 SOLVENT CDCl3  
 NS 16  
 DS 4  
 SWH 133928.578 Hz  
 FIDRES 1.022761 Hz  
 AQ 0.9777451 sec  
 RG 186.92  
 DW 3.733 usec  
 DE 6.70 usec  
 TE 300.0 K  
 D1 4.00000000 sec  
 TD0 1  
 SFO1 564.6299217 MHz  
 NUC1 19F  
 P1 12.00 usec  
 PLW1 49.00000000 W

F2 - Processing parameters  
 SI 262144  
 SF 564.6863882 MHz  
 WDW EM  
 SSB 0  
 LB 0.50 Hz  
 GB 0  
 PC 2.00

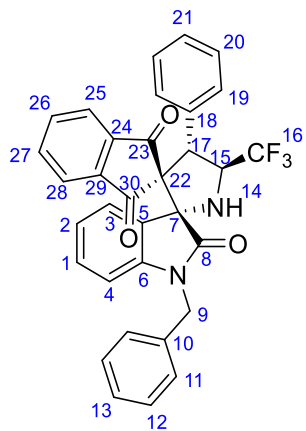

5a

Major diastereomer

<sup>1</sup>H NMR

600 MHz

CDCl<sub>3</sub>

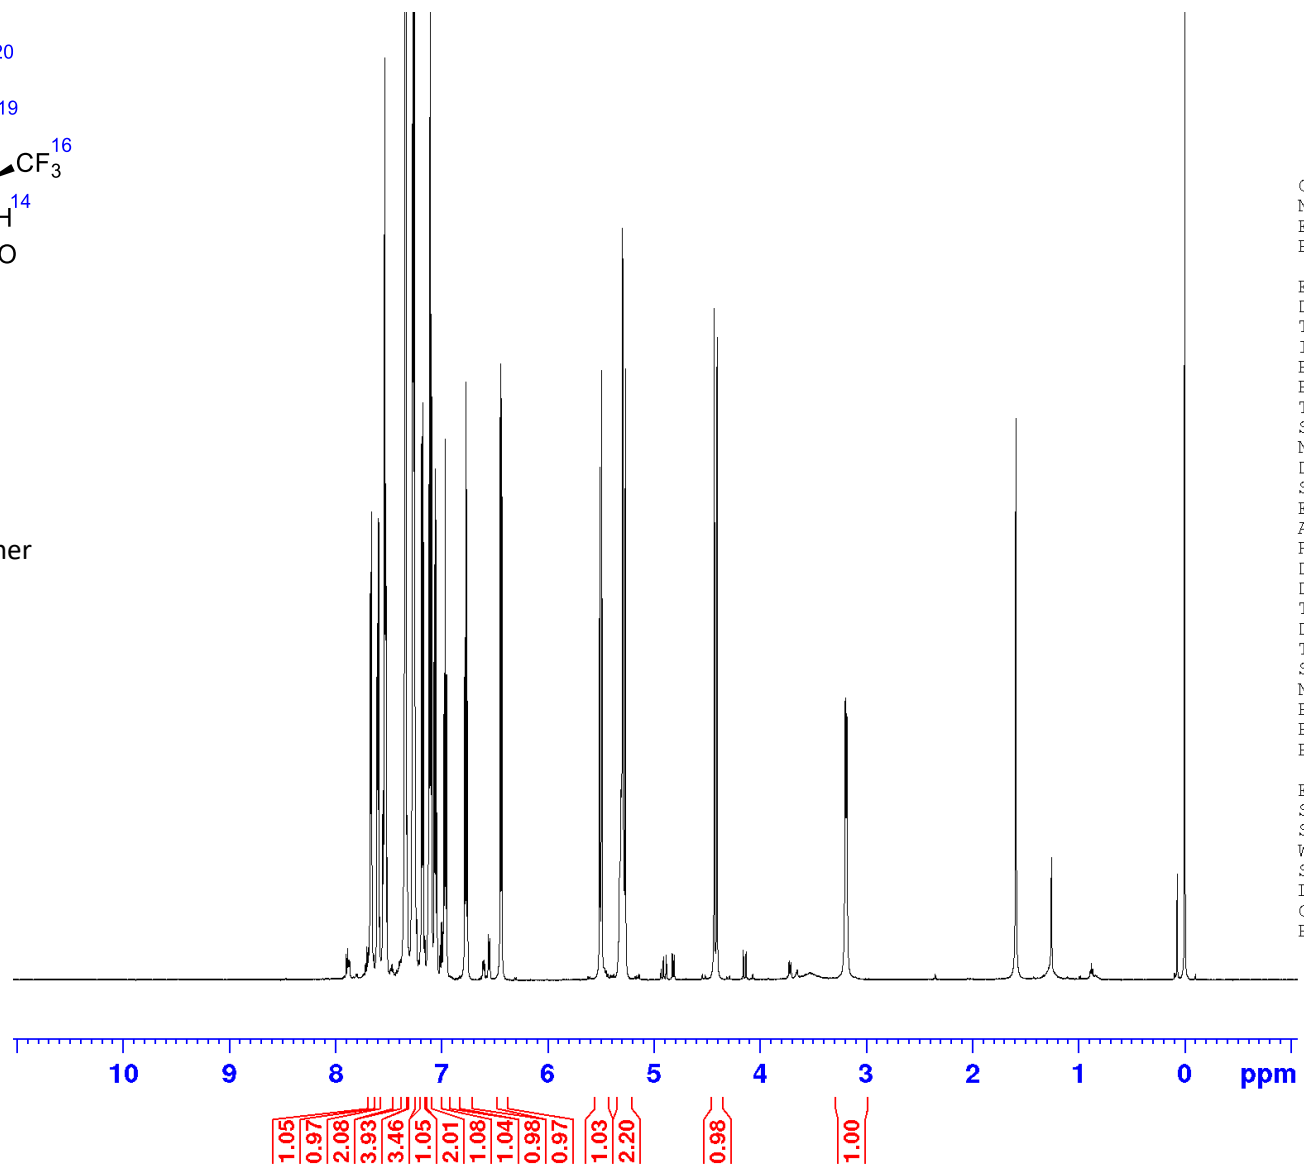

Current Data Parameters  
 NAME WR 1.136 (600)  
 EXPNO 10  
 PROCNO 1

F2 - Acquisition Parameters  
 Date\_ 20210715  
 Time 2.24 h  
 INSTRUM spect  
 PROBHD Z114607\_0188 (  
 PULPROG zg30  
 TD 65536  
 SOLVENT CDCl3  
 NS 16  
 DS 2  
 SWH 12019.230 Hz  
 FIDRES 0.366798 Hz  
 AQ 2.7262976 sec  
 RG 83.95  
 DW 41.600 usec  
 DE 12.10 usec  
 TE 302.4 K  
 D1 1.00000000 sec  
 TD0 1  
 SFO1 600.1337058 MHz  
 NUC1 1H  
 P0 3.33 usec  
 P1 10.00 usec  
 PLW1 26.60000038 W

F2 - Processing parameters  
 SI 65536  
 SF 600.1300152 MHz  
 WDW EM  
 SSB 0  
 LB 0.30 Hz  
 GB 0  
 PC 1.00

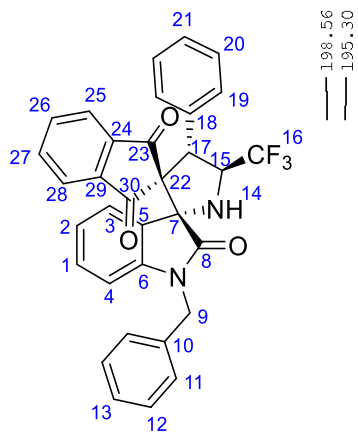

5a

Major diastereomer

<sup>13</sup>C NMR

151 MHz

CDCl<sub>3</sub>

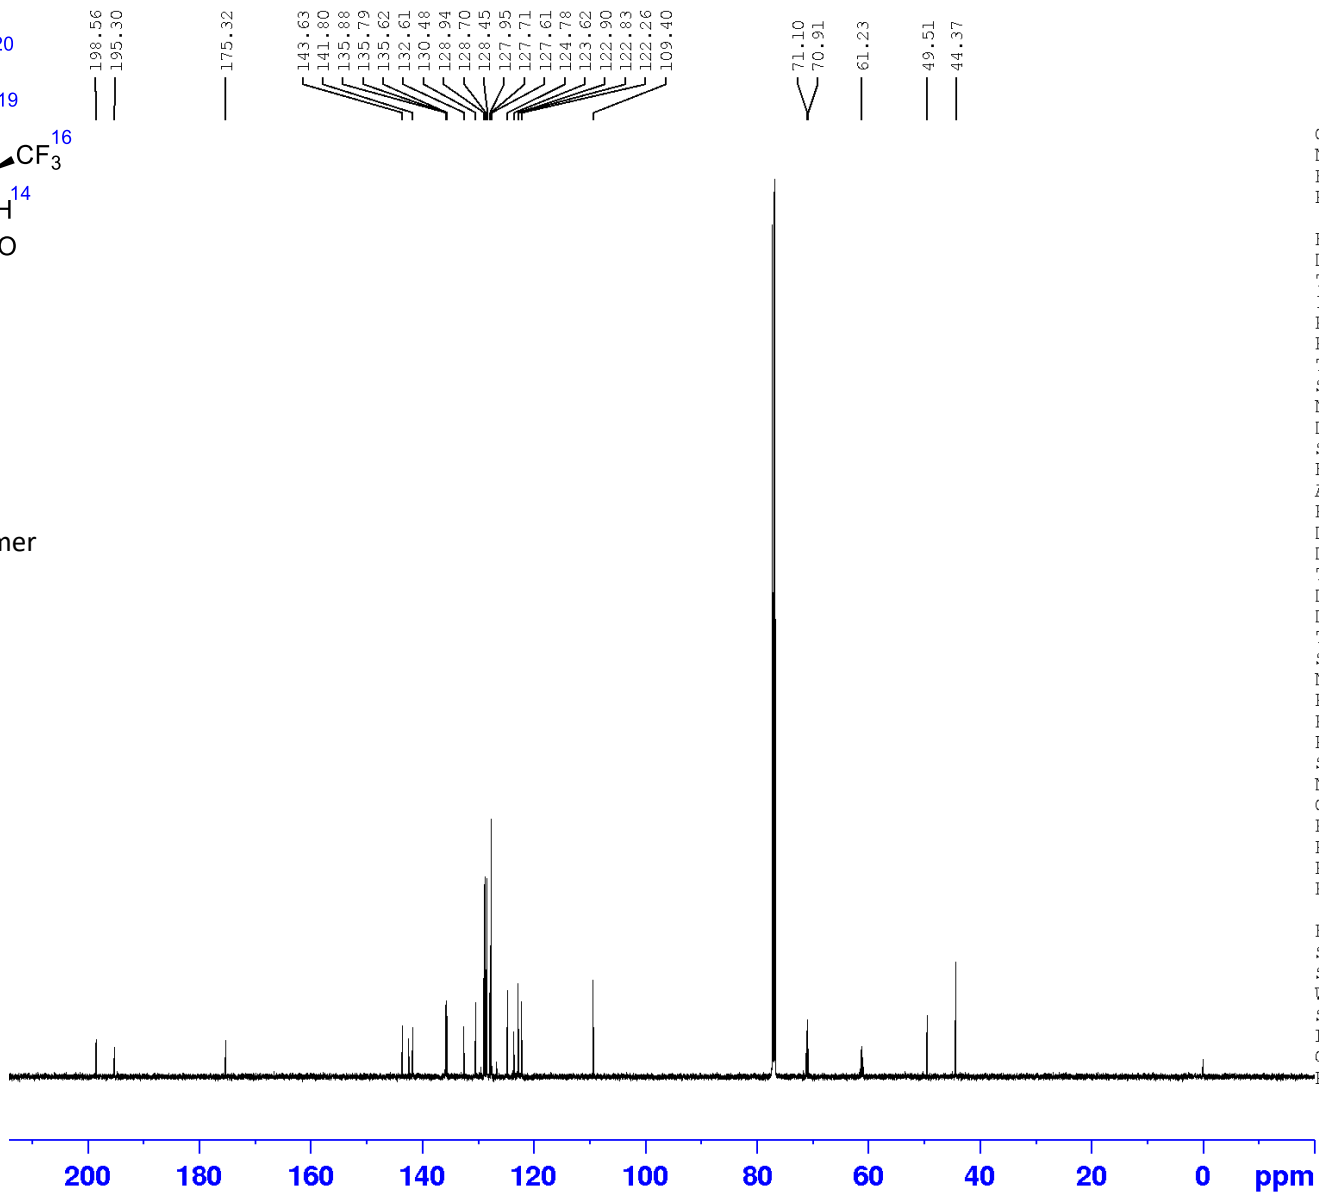

Current Data Parameters  
NAME WR 1.136 (600)  
EXPNO 11  
PROCNO 1

F2 - Acquisition Parameters  
Date\_ 20210715  
Time 3.16 h  
INSTRUM spect  
PROBHD Z114607\_0188 (  
PULPROG zgpg30  
TD 65536  
SOLVENT CDCl3  
NS 1024  
DS 4  
SWH 36231.883 Hz  
FIDRES 1.105709 Hz  
AQ 0.9043968 sec  
RG 186.92  
DW 13.800 usec  
DE 6.50 usec  
TE 304.1 K  
D1 2.00000000 sec  
D11 0.03000000 sec  
TD0 1  
SFO1 150.9178988 MHz  
NUC1 13C  
P0 3.93 usec  
P1 11.80 usec  
PLW1 85.00000000 W  
SFO2 600.1324005 MHz  
NUC2 1H  
CPDPRG[2] waltz65  
PCPD2 70.00 usec  
PLW2 27.00000000 W  
PLW12 0.57327998 W  
PLW13 0.28836000 W

F2 - Processing parameters  
SI 32768  
SF 150.9028085 MHz  
WDW EM  
SSB 0  
LB 1.00 Hz  
GB 0  
PC 1.40



5a

Major diastereomer

<sup>19</sup>F NMR

564 MHz

CDCl<sub>3</sub>

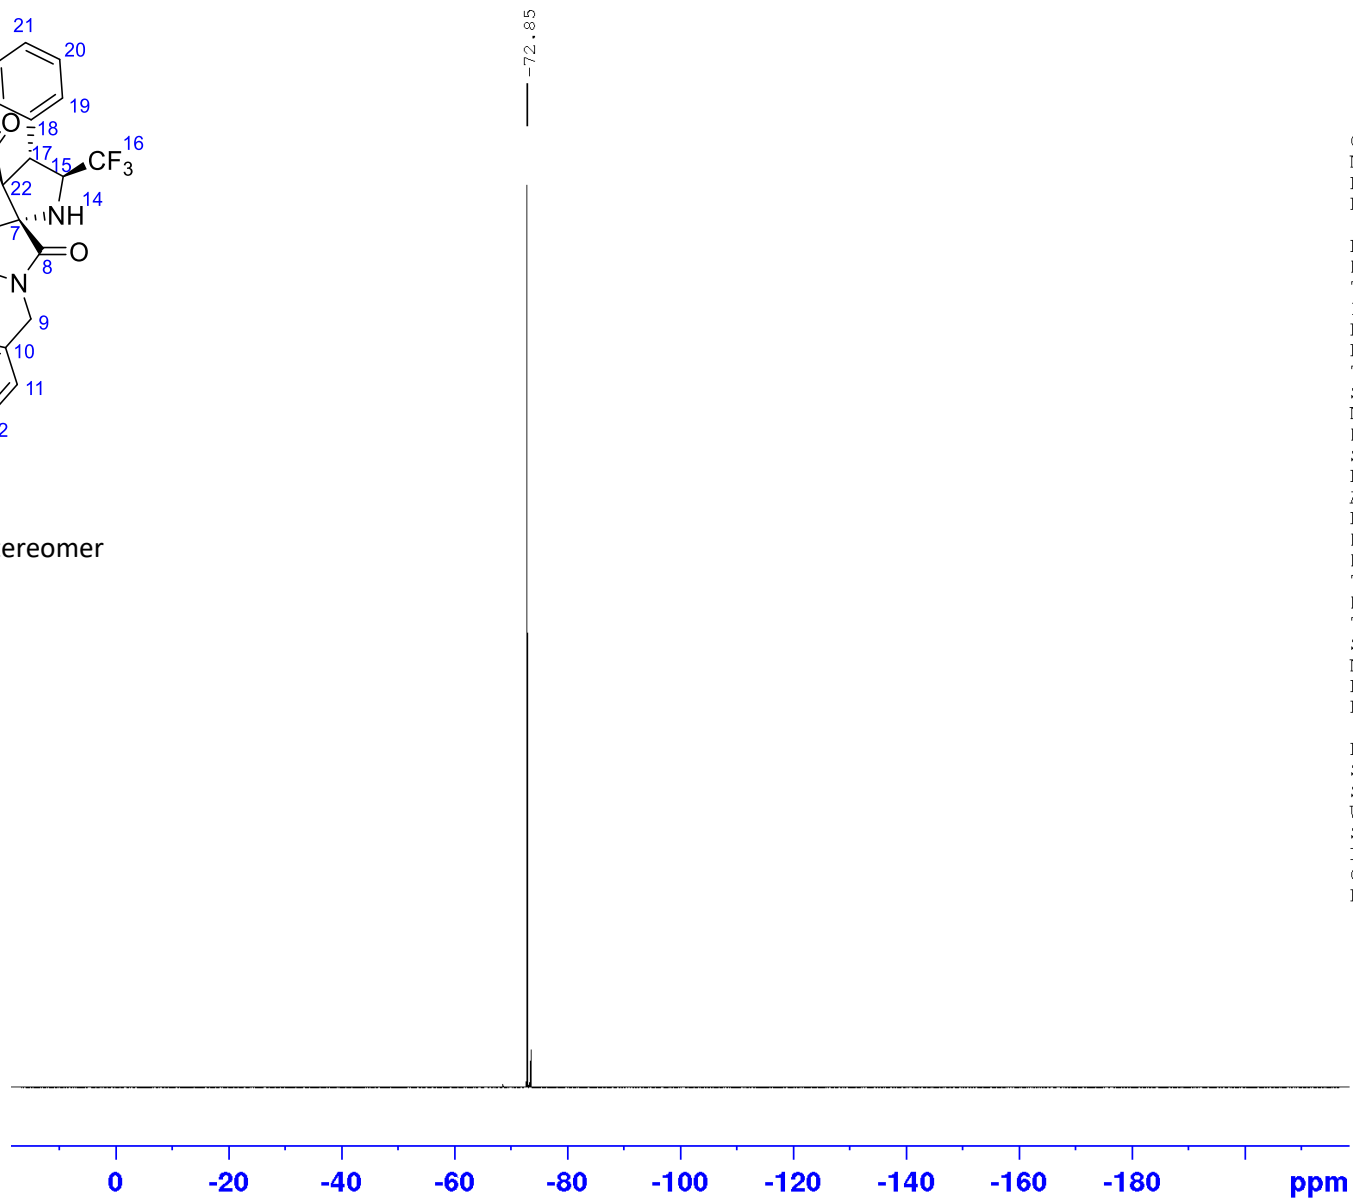

Current Data Parameters  
 NAME WR 1.136 (600)  
 EXPNO 18  
 PROCNO 1

F2 - Acquisition Parameters  
 Date\_ 20210715  
 Time 5.25 h  
 INSTRUM spect  
 PROBHD Z114607\_0188 (  
 PULPROG zgflqn  
 TD 261896  
 SOLVENT CDCl3  
 NS 16  
 DS 4  
 SWH 133928.578 Hz  
 FIDRES 1.022761 Hz  
 AQ 0.9777451 sec  
 RG 186.92  
 DW 3.733 usec  
 DE 6.70 usec  
 TE 302.5 K  
 D1 4.00000000 sec  
 TD0 1  
 SFO1 564.6299217 MHz  
 NUC1 19F  
 P1 12.00 usec  
 PLW1 49.00000000 W

F2 - Processing parameters  
 SI 262144  
 SF 564.6863882 MHz  
 WDW EM  
 SSB 0  
 LB 0.50 Hz  
 GB 0  
 PC 2.00



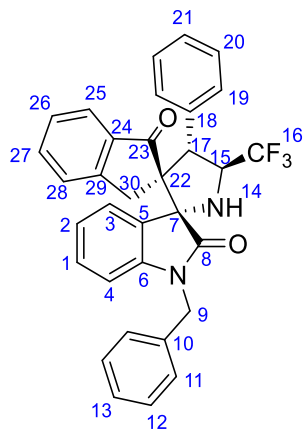

5b

Major diastereomer

<sup>1</sup>H NMR

600 MHz

CDCl<sub>3</sub>

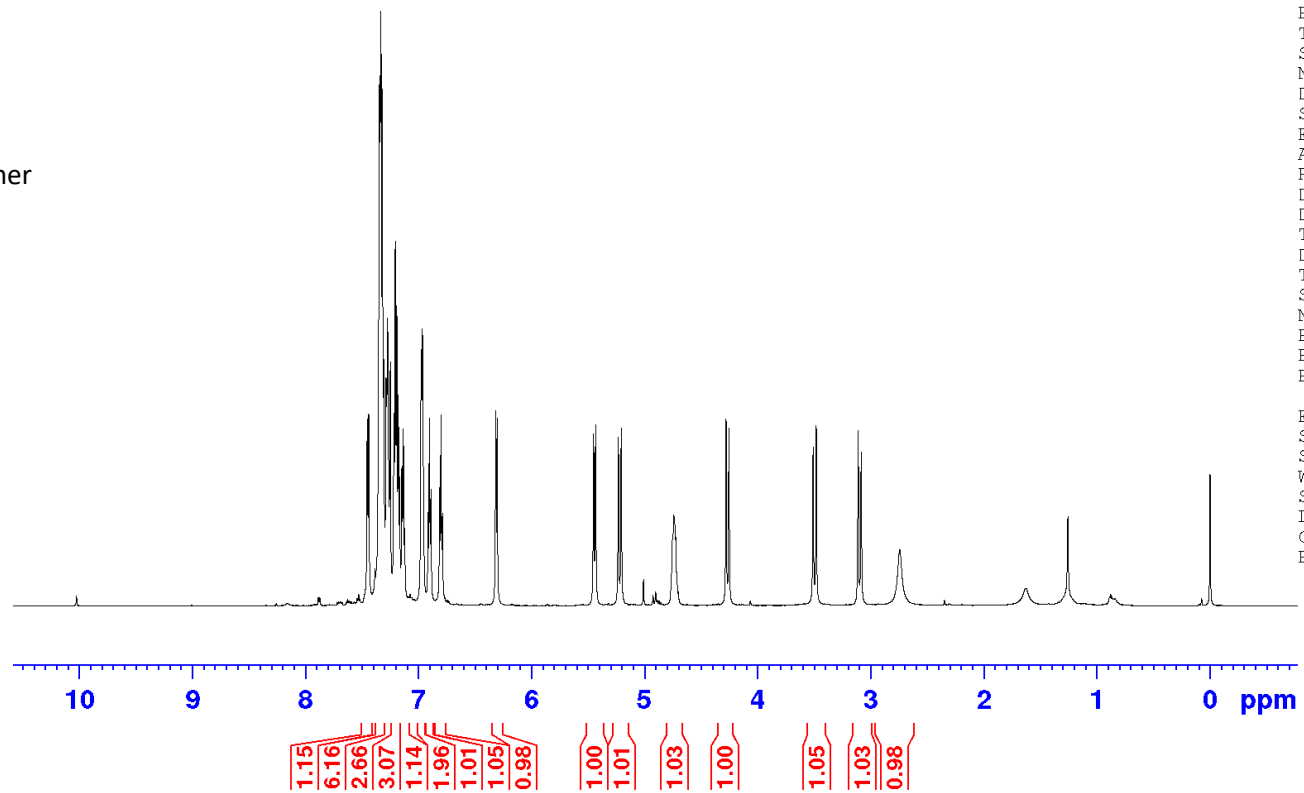

Current Data Parameters  
 NAME WR 1.131 (600)  
 EXPNO 10  
 PROCNO 1

F2 - Acquisition Parameters  
 Date\_ 20210714  
 Time 23.18 h  
 INSTRUM spect  
 PROBHD Z114607\_0188 (  
 PULPROG zg30  
 TD 65536  
 SOLVENT CDCl3  
 NS 16  
 DS 2  
 SWH 12019.230 Hz  
 FIDRES 0.366798 Hz  
 AQ 2.7262976 sec  
 RG 68  
 DW 41.600 usec  
 DE 12.10 usec  
 TE 303.6 K  
 D1 1.00000000 sec  
 TD0 1  
 SFO1 600.1337058 MHz  
 NUC1 1H  
 P0 3.33 usec  
 P1 10.00 usec  
 PLW1 26.60000038 W

F2 - Processing parameters  
 SI 65536  
 SF 600.1300185 MHz  
 WDW EM  
 SSB 0  
 LB 0.30 Hz  
 GB 0  
 PC 1.00

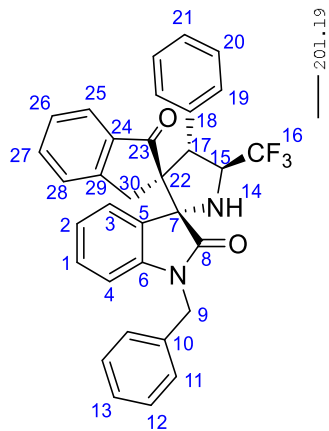

5b

Major diastereomer

<sup>13</sup>C NMR

151 MHz

CDCl<sub>3</sub>

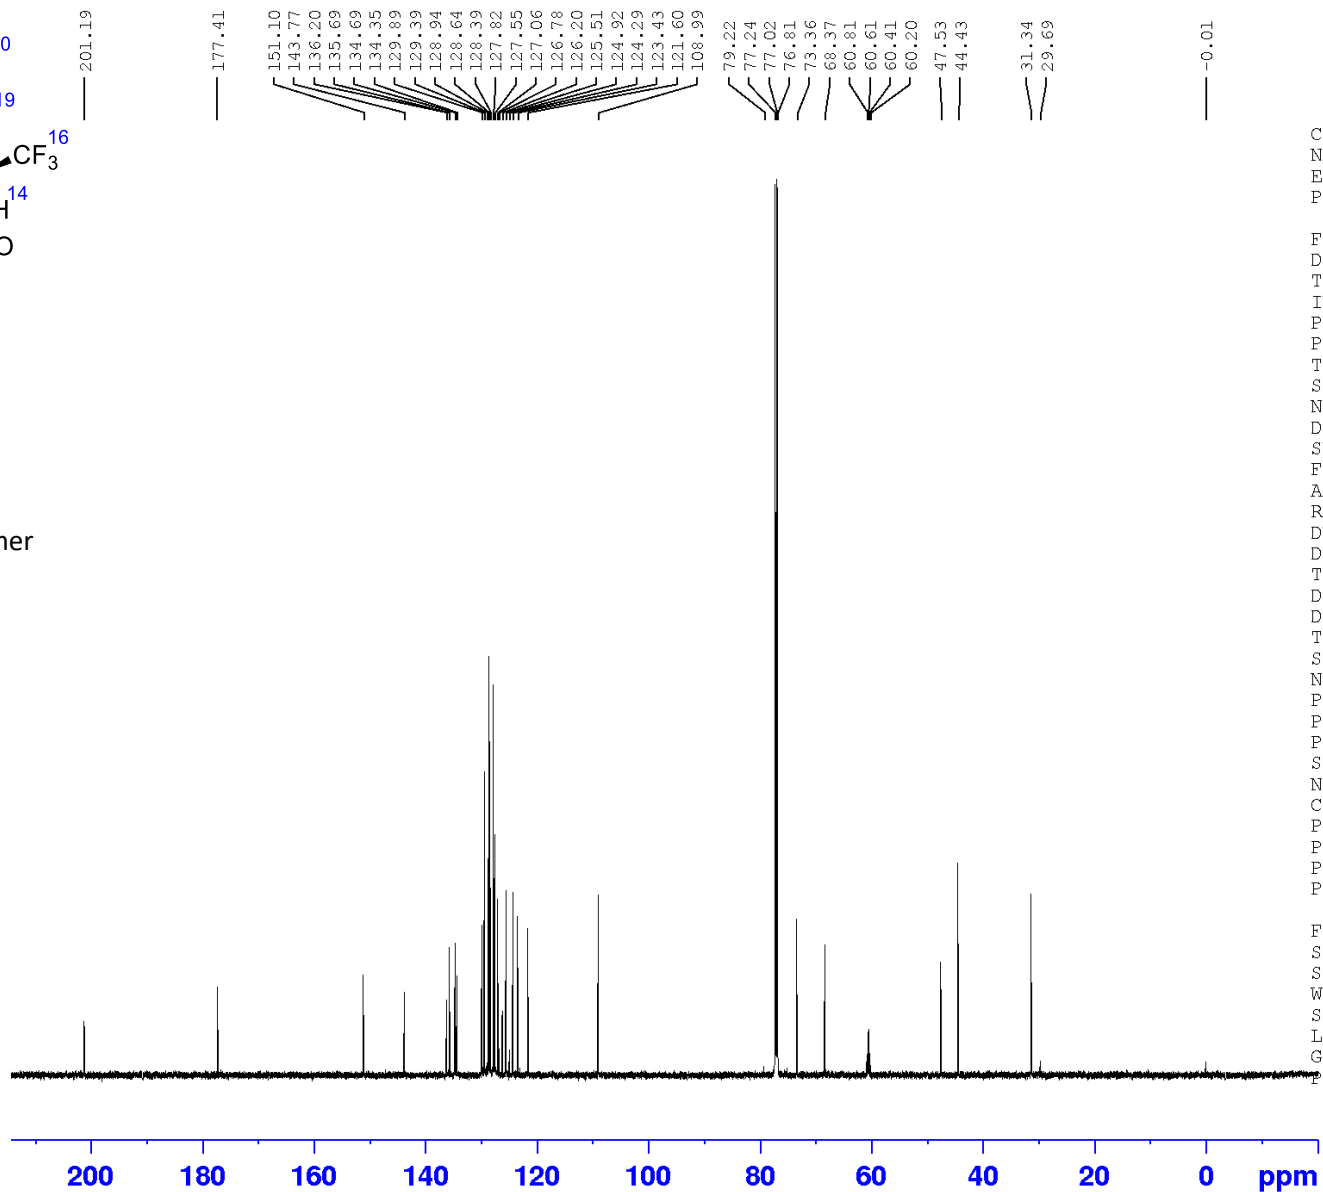

Current Data Parameters  
 NAME WR 1.131 (600)  
 EXPNO 11  
 PROCNO 1

F2 - Acquisition Parameters  
 Date\_ 20210715  
 Time 0.09 h  
 INSTRUM spect  
 PROBHD Z114607\_0188 (  
 PULPROG zgpg30  
 TD 65536  
 SOLVENT CDCl3  
 NS 1024  
 DS 4  
 SWH 36231.883 Hz  
 FIDRES 1.105709 Hz  
 AQ 0.9043968 sec  
 RG 186.92  
 DW 13.800 use  
 DE 6.50 use  
 TE 304.4 K  
 D1 2.00000000 sec  
 D11 0.03000000 sec  
 TD0 1  
 SFO1 150.9178988 MHz  
 NUC1 13C  
 P0 3.93 use  
 P1 11.80 use  
 PLW1 85.00000000 W  
 SFO2 600.1324005 MHz  
 NUC2 1H  
 CPDPRG[2] waltz65  
 PCPD2 70.00 use  
 PLW2 27.00000000 W  
 PLW12 0.57327998 W  
 PLW13 0.28836000 W

F2 - Processing parameters  
 SI 32768  
 SF 150.9028085 MHz  
 WDW EM  
 SSB 0  
 LB 1.00 Hz  
 GB 0  
 PC 1.40



5b

Major diastereomer

<sup>19</sup>F NMR

564 MHz

CDCl<sub>3</sub>

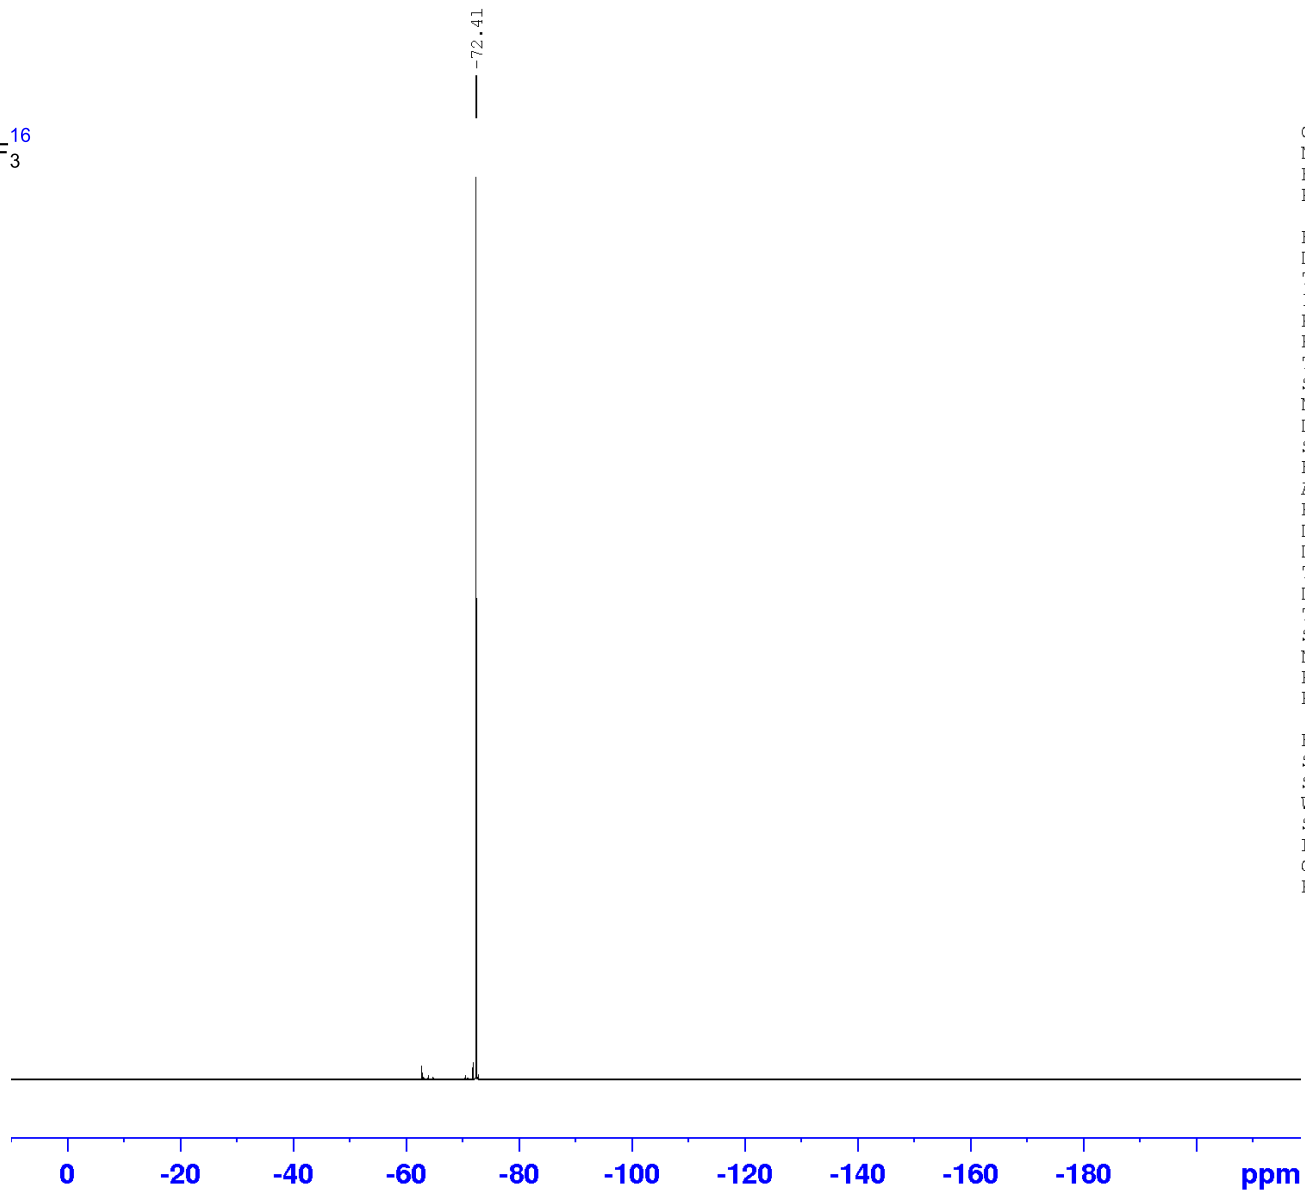

Current Data Parameters  
 NAME WR 1.131 (600)  
 EXPNO 18  
 PROCNO 1

F2 - Acquisition Parameters  
 Date\_ 20210715  
 Time 2.18 h  
 INSTRUM spect  
 PROBHD Z114607\_0188 (  
 PULPROG zgfgqn  
 TD 261896  
 SOLVENT CDCl3  
 NS 16  
 DS 4  
 SWH 133928.578 H:  
 FIDRES 1.022761 H:  
 AQ 0.9777451 s:  
 RG 186.92  
 DW 3.733 u:  
 DE 6.70 u:  
 TE 302.4 K  
 D1 4.00000000 s:  
 TD0 1  
 SFO1 564.6299217 M:  
 NUC1 19F  
 P1 12.00 u:  
 PLW1 49.00000000 W

F2 - Processing parameters:  
 SI 262144  
 SF 564.6863882 M:  
 WDW EM  
 SSB 0  
 LB 0.50 H:  
 GB 0  
 PC 2.00

## 8 References

- 1 J. Cosier and A. M. Glazer, *J. Appl. Crystallogr.*, 1986, **19**, 105–107.
- 2 *CrysAlisPRO*, Oxford Diffraction/Agilent Technologies UK Ltd, Yarnton, England.
- 3 G. M. Sheldrick, *Acta Crystallogr. Sect. A*, 2015, **71**, 3–8.
- 4 L. Palatinus and G. Chapuis, *J. Appl. Crystallogr.*, 2007, **40**, 786–790.
- 5 P. W. Betteridge, J. R. Carruthers, R. I. Cooper, K. Prout and D. J. Watkin, *J. Appl. Crystallogr.*, 2003, **36**, 1487.
- 6 R. I. Cooper, A. L. Thompson and D. J. Watkin, *J. Appl. Crystallogr.*, 2008, **43**, 1100–1107.
- 7 J. M. G. O. Ferreira, J. B. M. De Resende Filho, P. K. Batista, E. E. S. Teotonio and J. A. Vale, *J. Braz. Chem. Soc.*, 2018, **29**, 1382–1387.
- 8 M. Zhang, A. Q. Zhang, H. H. Chen, J. Chen and H. Y. Chen, *Synth. Commun.*, 2006, **36**, 3441–3445.
- 9 Y. Song, H. Jing, B. Li and D. Bai, *Chem. Eur. J*, 2011, **17**, 8731–8738.
- 10 S. P. Bhoite, A. H. Bansode and G. Suryavanshi, *J. Org. Chem.*, 2020, **85**, 14858–14865.
- 11 K. Yamashita, T. Tanaka and M. Hayashi, *Tetrahedron*, 2005, **61**, 7981–7985.
- 12 Z. Li, H. Li, X. Guo, L. Cao, R. Yu, H. Li and S. Pan, *Org. Lett.*, 2008, **10**, 803–805.
- 13 T. M. Kadayat, S. Banskota, P. Gurung, G. Bist, T. B. Thapa Magar, A. Shrestha, J. A. Kim and E. S. Lee, *Eur. J. Med. Chem.*, 2017, **137**, 575–597.
- 14 C. S. Buxton, D. C. Blakemore and J. F. Bower, *Angew. Chem. Int. Ed.*, 2017, **56**, 13824–13828.
- 15 M. Ma, Y. Zhu, Q. Sun, X. Li, J. Su, L. Zhao, Y. Zhao, S. Qiu, W. Yan, K. Wang and R. Wang, *Chem. Commun.*, 2015, **51**, 8789–8792.
- 16 B. Ma, P. Wu, X. Wang, Z. Wang, H. X. Lin and H. X. Dai, *Angew. Chem. Int. Ed.*, 2019, **58**, 13335–13339.
- 17 C. Jin, M. Zhang, L. Wu, Y. Guan, Y. Pan, J. Jiang, C. Lin and L. Wang, *Chem. Commun.*, 2013, **49**, 2025–2027.
- 18 C. J. Thomson, D. M. Barber and D. J. Dixon, *Angew. Chem. Int. Ed.*, 2019, **58**, 2469–2473.
- 19 C. B. Tripathi, S. Kayal and S. Mukherjee, *Org. Lett.*, 2012, **14**, 3296–3299.
- 20 Y. Zhu, J. P. Malerich and V. H. Rawal, *Angew. Chem. Int. Ed.*, 2010, **49**, 153–156.
- 21 E. Matador, M. de Gracia Retamosa, D. Monge, J. Iglesias-Sigüenza, R. Fernández and J. M. Lassaletta, *Chem. Eur. J*, 2018, **24**, 6854–6860.
- 22 F. Yu, Z. Jin, H. Huang, T. Ye, X. Liang and J. Ye, *Org. Biomol. Chem.*, 2010, **8**, 4767–4774.
- 23 N. Akhtar, A. Saha, V. Kumar, N. Pradhan, S. Panda, S. Morla, S. Kumar and D. Manna, *ACS Appl. Mater. Interfaces*, 2018, **10**, 33803–33813.
- 24 M. H. Furigay, M. M. Boucher, N. A. Mizgier and C. S. Brindle, *J. Vis. Exp.*, 2018, 1–10, doi:10.3791/57639.
